# Supplementary material for: SIRT6 enhances telomerase activity to protect against DNA damage and senescence in hypertrophic ligamentum flavum cells from lumbar spinal stenosis patients
Source: Aging (Albany NY). 2021 Feb 10;13(4):6025–40. doi: 10.18632/aging.202536 (PMC7950242; doi:10.18632/aging.202536)
Supplement: Supplementary Table 1 [file aging-13-202536-s002.xlsx]

## Sheet: up.LFH_vs_LFN
Supplementary Table 1. Differentially expressed genes between non-hypertrophic (LFN) and hypertrophic ligamentum flavum (LFH).
LFH vs LFN.up Fold Change: 2.0 p-value: 0.05 FPKM >= 0.1 in at least one group Column A: gene, the gene name. Column B: gene_id, the Ensembl gene identifier. Column C: biotype, protein_coding. Column D: strand, transcription direction. Column E: locus, genomic locus. chromosome: start-end. Column F ~ G, FPKM value of each group. Column H: fold change, fold change between two groups (to avoid divi…
LFH vs LFN up-regulated genes
gene	gene_id	biotype	strand	locus	LFH_FPKM	LFN_FPKM	Fold change	log2(fold change)	p_value	FDR	Regulation	GeneID	Synonyms	dbXrefs	chromosome	map_location	description	pathway	GO-CC	GO-MF	GO-BP
TSPAN6	ENSG00000000003	protein_coding	-	chrX:99883666-99894988	16.93	8.43445	1.90048	1.00522	5e-05	0.000136014	up	7105	T245|TM4SF6|TSPAN-6	MIM:300191|HGNC:HGNC:11858|Ensembl:ENSG00000000003|HPRD:02179	X	Xq22	tetraspanin 6		GO:0016021(integral component of membrane)//GO:0005887(integral component of plasma membrane)//GO:0070062(extracellular exosome)	GO:0004871(signal transducer activity)//GO:0005515(protein binding)	GO:1901223(negative regulation of NIK/NF-kappaB signaling)//GO:0039532(negative regulation of viral-induced cytoplasmic pattern recognition receptor signaling pathway)//GO:0007166(cell surface receptor signaling pathway)//GO:0043123(positive regulation of I-kappaB kinase/NF-kappaB signaling)
DPM1	ENSG00000000419	protein_coding	-	chr20:49505584-49575092	13.9962	5.82163	2.19833	1.26554	5e-05	0.000136014	up	8813	CDGIE|MPDS	MIM:603503|HGNC:HGNC:3005|Ensembl:ENSG00000000419|HPRD:04613|Vega:OTTHUMG00000032742	20	20q13.13	dolichyl-phosphate mannosyltransferase polypeptide 1, catalytic subunit	hsa00510(N-Glycan biosynthesis)//	GO:0005783(endoplasmic reticulum)//GO:0016020(membrane)//GO:0033185(dolichol-phosphate-mannose synthase complex)//GO:0005634(nucleus)//GO:0005789(endoplasmic reticulum membrane)	GO:0004169(dolichyl-phosphate-mannose-protein mannosyltransferase activity)//GO:0016757(transferase activity, transferring glycosyl groups)//GO:0043178(alcohol binding)//GO:0004582(dolichyl-phosphate beta-D-mannosyltransferase activity)//GO:0005537(mannose binding)//GO:0005515(protein binding)	GO:0035269(protein O-linked mannosylation)//GO:0044267(cellular protein metabolic process)//GO:0008152(metabolic process)//GO:0035268(protein mannosylation)//GO:0019673(GDP-mannose metabolic process)//GO:0006488(dolichol-linked oligosaccharide biosynthetic process)//GO:0006506(GPI anchor biosynthetic process)//GO:0006501(C-terminal protein lipidation)//GO:0043687(post-translational protein modifi…
BAD	ENSG00000002330	protein_coding	-	chr11:64037301-64056972	18.3828	5.41936	3.01943	1.76216	5e-05	0.000136014	up	572	BBC2|BCL2L8	MIM:603167|HGNC:HGNC:936|Ensembl:ENSG00000002330|HPRD:04409|Vega:OTTHUMG00000134302	11	11q13.1	BCL2 associated agonist of cell death	hsa04012(ErbB signaling pathway)//hsa04014(Ras signaling pathway)//hsa04022(cGMP-PKG signaling pathway)//hsa04024(cAMP signaling pathway)//hsa04151(PI3K-Akt signaling pathway)//hsa04210(Apoptosis)//hsa04370(VEGF signaling pathway)//hsa04510(Focal adhesion)//hsa04722(Neurotrophin signaling pathway)//hsa04910(Insulin signaling pathway)//hsa04919(Thyroid hormone signaling pathway)//hsa05010(Alzheime…	GO:0005739(mitochondrion)//GO:0005741(mitochondrial outer membrane)//GO:0005829(cytosol)	GO:0019901(protein kinase binding)//GO:0005515(protein binding)//GO:0046982(protein heterodimerization activity)//GO:0008289(lipid binding)//GO:0043422(protein kinase B binding)//GO:0030346(protein phosphatase 2B binding)//GO:0008656(cysteine-type endopeptidase activator activity involved in apoptotic process)//GO:0005543(phospholipid binding)//GO:0071889(14-3-3 protein binding)	GO:0071396(cellular response to lipid)//GO:0045862(positive regulation of proteolysis)//GO:0021987(cerebral cortex development)//GO:0032024(positive regulation of insulin secretion)//GO:0042593(glucose homeostasis)//GO:0097192(extrinsic apoptotic signaling pathway in absence of ligand)//GO:2000078(positive regulation of type B pancreatic cell development)//GO:0007283(spermatogenesis)//GO:0045579(…
MTMR7	ENSG00000003987	protein_coding	-	chr8:17086736-17271037	1.79888	0.474388	1.89833	1.92296	0.0039	0.00770658	up	9108	-	MIM:603562|HGNC:HGNC:7454|Ensembl:ENSG00000003987|HPRD:16027|Vega:OTTHUMG00000163771	8	8p22	myotubularin related protein 7	hsa00562(Inositol phosphate metabolism)//	GO:0016020(membrane)//GO:0005829(cytosol)	GO:0005515(protein binding)//GO:0052866(phosphatidylinositol phosphate phosphatase activity)//GO:0004725(protein tyrosine phosphatase activity)	GO:0006644(phospholipid metabolic process)//GO:0044281(small molecule metabolic process)//GO:0046856(phosphatidylinositol dephosphorylation)//GO:0006661(phosphatidylinositol biosynthetic process)//GO:0046855(inositol phosphate dephosphorylation)//GO:0006470(protein dephosphorylation)//GO:0035335(peptidyl-tyrosine dephosphorylation)
AK2	ENSG00000004455	protein_coding	-	chr1:33452552-33546597	93.5374	40.5721	2.27406	1.20506	5e-05	0.000136014	up	204	ADK2	MIM:103020|HGNC:HGNC:362|Ensembl:ENSG00000004455|HPRD:00047|Vega:OTTHUMG00000004131	1	1p34	adenylate kinase 2	hsa00230(Purine metabolism)//	GO:0005743(mitochondrial inner membrane)//GO:0005758(mitochondrial intermembrane space)//GO:0097226(sperm mitochondrial sheath)//GO:0070062(extracellular exosome)//GO:0005829(cytosol)	GO:0005524(ATP binding)//GO:0019205(nucleobase-containing compound kinase activity)//GO:0004017(adenylate kinase activity)	GO:0046060(dATP metabolic process)//GO:0044281(small molecule metabolic process)//GO:0016310(phosphorylation)//GO:0001889(liver development)//GO:0046939(nucleotide phosphorylation)//GO:0006172(ADP biosynthetic process)//GO:0007420(brain development)//GO:0015949(nucleobase-containing small molecule interconversion)//GO:0046033(AMP metabolic process)//GO:0006119(oxidative phosphorylation)//GO:00970…
ZMYND10	ENSG00000004838	protein_coding	-	chr3:50378536-50384283	1.68866	0.151344	2.33524	3.47998	0.049	0.074384	up	51364	BLU|CILD22|FLU	MIM:607070|HGNC:HGNC:19412|Ensembl:ENSG00000004838|HPRD:06145|Vega:OTTHUMG00000156874	3	3p21.3	zinc finger MYND-type containing 10		GO:0034451(centriolar satellite)//GO:0005737(cytoplasm)	GO:0046872(metal ion binding)//GO:0005515(protein binding)	GO:0036158(outer dynein arm assembly)//GO:0044458(motile cilium assembly)//GO:0036159(inner dynein arm assembly)
HCCS	ENSG00000004961	protein_coding	+	chrX:11129420-11683821	4.85635	2.32018	1.76387	1.06564	0.0002	0.000503289	up	3052	CCHL|LSDMCA1|MCOPS7|MLS	MIM:300056|HGNC:HGNC:4837|Ensembl:ENSG00000004961|HPRD:02085|Vega:OTTHUMG00000021128	X	Xp22.3	holocytochrome c synthase	hsa00860(Porphyrin and chlorophyll metabolism)	GO:0005743(mitochondrial inner membrane)//GO:0005739(mitochondrion)	GO:0046872(metal ion binding)//GO:0004408(holocytochrome-c synthase activity)	GO:0009887(organ morphogenesis)//GO:0055114(oxidation-reduction process)
UPF1	ENSG00000005007	protein_coding	+	chr19:18942746-18979045	35.5265	14.9945	2.28369	1.24446	5e-05	0.000136014	up	5976	HUPF1|NORF1|RENT1|pNORF1|smg-2	MIM:601430|HGNC:HGNC:9962|Ensembl:ENSG00000005007|HPRD:03254|Vega:OTTHUMG00000183025	19	19p13.11	UPF1 regulator of nonsense transcripts homolog (yeast)	hsa03013(RNA transport)//hsa03015(mRNA surveillance pathway)	GO:0035145(exon-exon junction complex)//GO:0000932(cytoplasmic mRNA processing body)//GO:0005829(cytosol)//GO:0000784(nuclear chromosome, telomeric region)//GO:0044530(supraspliceosomal complex)//GO:0000785(chromatin)//GO:0005654(nucleoplasm)//GO:0005634(nucleus)//GO:0005737(cytoplasm)	GO:0008270(zinc ion binding)//GO:0005524(ATP binding)//GO:0003723(RNA binding)//GO:0003682(chromatin binding)//GO:0004386(helicase activity)//GO:0042162(telomeric DNA binding)//GO:0044822(poly(A) RNA binding)//GO:0005515(protein binding)//GO:0004004(ATP-dependent RNA helicase activity)	GO:0006406(mRNA export from nucleus)//GO:0000723(telomere maintenance)//GO:0000184(nuclear-transcribed mRNA catabolic process, nonsense-mediated decay)//GO:0061158(3'-UTR-mediated mRNA destabilization)//GO:0000956(nuclear-transcribed mRNA catabolic process)//GO:0061014(positive regulation of mRNA catabolic process)//GO:0010467(gene expression)//GO:0009048(dosage compensation by inactivation of X …
SKAP2	ENSG00000005020	protein_coding	-	chr7:26706680-27034858	17.3089	7.58997	2.13143	1.18935	5e-05	0.000136014	up	8935	PRAP|RA70|SAPS|SCAP2|SKAP-HOM|SKAP55R	MIM:605215|HGNC:HGNC:15687|Ensembl:ENSG00000005020|HPRD:05558|Vega:OTTHUMG00000023495	7	7p15.2	src kinase associated phosphoprotein 2		GO:0005654(nucleoplasm)//GO:0005886(plasma membrane)//GO:0005737(cytoplasm)//GO:0005829(cytosol)	GO:0005515(protein binding)//GO:0005070(SH3/SH2 adaptor activity)	GO:0006461(protein complex assembly)//GO:0002757(immune response-activating signal transduction)//GO:0042113(B cell activation)//GO:0009967(positive regulation of signal transduction)//GO:0007165(signal transduction)
CCDC109B	ENSG00000005059	protein_coding	+	chr4:110481360-110624739	18.1316	4.40972	3.53652	2.03975	5e-05	0.000136014	up	55013	MCUb	HGNC:HGNC:26076|Ensembl:ENSG00000005059|HPRD:07939|Vega:OTTHUMG00000161103	4	4q25	coiled-coil domain containing 109B		GO:0034704(calcium channel complex)//GO:0031305(integral component of mitochondrial inner membrane)//GO:0005739(mitochondrion)//GO:0031224(intrinsic component of membrane)//GO:1990246(uniplex complex)	GO:0015292(uniporter activity)//GO:0019855(calcium channel inhibitor activity)//GO:0005262(calcium channel activity)//GO:0005216(ion channel activity)	GO:0036444(calcium ion transmembrane import into mitochondrion)//GO:0051560(mitochondrial calcium ion homeostasis)//GO:0006851(mitochondrial calcium ion transport)
MEOX1	ENSG00000005102	protein_coding	-	chr17:41717755-41739322	10.3218	5.11748	1.85073	1.01218	5e-05	0.000136014	up	4222	KFS2|MOX1	MIM:600147|HGNC:HGNC:7013|Ensembl:ENSG00000005102|HPRD:02537|Vega:OTTHUMG00000170513	17	17q21	mesenchyme homeobox 1		GO:0005634(nucleus)//GO:0005737(cytoplasm)	GO:0003674(molecular_function)//GO:0003682(chromatin binding)//GO:0003700(transcription factor activity, sequence-specific DNA binding)//GO:0043565(sequence-specific DNA binding)//GO:0000978(RNA polymerase II core promoter proximal region sequence-specific DNA binding)//GO:0071837(HMG box domain binding)//GO:0001077(transcriptional activator activity, RNA polymerase II core promoter proximal regi…	GO:0061056(sclerotome development)//GO:0001757(somite specification)//GO:0061053(somite development)//GO:0060218(hematopoietic stem cell differentiation)//GO:0006366(transcription from RNA polymerase II promoter)//GO:0007275(multicellular organism development)//GO:0045944(positive regulation of transcription from RNA polymerase II promoter)//GO:0008150(biological_process)
AC004381.6	ENSG00000005189	protein_coding	+	chr16:20621564-20936331	1.62115	0.72283	1.52142	1.16529	0.0119	0.021094	up
PRKAR2B	ENSG00000005249	protein_coding	+	chr7:106685093-106802256	12.8239	4.22011	2.6482	1.60348	5e-05	0.000136014	up	5577	PRKAR2|RII-BETA	MIM:176912|HGNC:HGNC:9392|Ensembl:ENSG00000005249|HPRD:01486|Vega:OTTHUMG00000137418	7	7q22	protein kinase cAMP-dependent type II regulatory subunit beta	hsa04910(Insulin signaling pathway)	GO:0005743(mitochondrial inner membrane)//GO:0070062(extracellular exosome)//GO:0048471(perinuclear region of cytoplasm)//GO:0005886(plasma membrane)//GO:0005829(cytosol)//GO:0005952(cAMP-dependent protein kinase complex)//GO:0005813(centrosome)//GO:0045121(membrane raft)//GO:0097546(ciliary base)//GO:0043198(dendritic shaft)//GO:0043197(dendritic spine)//GO:0005737(cytoplasm)//GO:0043025(neurona…	GO:0004862(cAMP-dependent protein kinase inhibitor activity)//GO:0008603(cAMP-dependent protein kinase regulator activity)//GO:0019904(protein domain specific binding)//GO:0030552(cAMP binding)//GO:0034236(protein kinase A catalytic subunit binding)//GO:0031625(ubiquitin protein ligase binding)	GO:0097332(response to antipsychotic drug)//GO:2000480(negative regulation of cAMP-dependent protein kinase activity)//GO:0034199(activation of protein kinase A activity)//GO:0006112(energy reserve metabolic process)//GO:0000086(G2/M transition of mitotic cell cycle)//GO:0097338(response to clozapine)//GO:0055085(transmembrane transport)//GO:0050796(regulation of insulin secretion)//GO:0007596(bl…
WDR54	ENSG00000005448	protein_coding	+	chr2:74648804-74652882	5.78584	1.98718	2.27165	1.54181	5e-05	0.000136014	up	84058	-	HGNC:HGNC:25770|Ensembl:ENSG00000005448|HPRD:08577|Vega:OTTHUMG00000129951	2	2p13.1	WD repeat domain 54
ABCB4	ENSG00000005471	protein_coding	-	chr7:87031012-87109751	3.48633	1.13001	2.10625	1.62537	5e-05	0.000136014	up	5244	ABC21|GBD1|ICP3|MDR2|MDR2/3|MDR3|PFIC-3|PGY3	MIM:171060|HGNC:HGNC:45|Ensembl:ENSG00000005471|HPRD:01371|Vega:OTTHUMG00000023396	7	7q21.1	ATP binding cassette subfamily B member 4	hsa02010(ABC transporters)//hsa04976(Bile secretion)	GO:0030136(clathrin-coated vesicle)//GO:0005886(plasma membrane)//GO:0005887(integral component of plasma membrane)//GO:0046581(intercellular canaliculus)//GO:0016020(membrane)//GO:0045121(membrane raft)//GO:0005737(cytoplasm)//GO:0070062(extracellular exosome)//GO:0016324(apical plasma membrane)	GO:0008525(phosphatidylcholine transporter activity)//GO:0090554(phosphatidylcholine-translocating ATPase activity)//GO:0005524(ATP binding)//GO:0008559(xenobiotic-transporting ATPase activity)//GO:0042626(ATPase activity, coupled to transmembrane movement of substances)//GO:0005515(protein binding)	GO:0044255(cellular lipid metabolic process)//GO:0006855(drug transmembrane transport)//GO:0032376(positive regulation of cholesterol transport)//GO:0044281(small molecule metabolic process)//GO:0042493(response to drug)//GO:2001140(positive regulation of phospholipid transport)//GO:0002481(antigen processing and presentation of exogenous protein antigen via MHC class Ib, TAP-dependent)//GO:00024…
SOX8	ENSG00000005513	protein_coding	+	chr16:1031807-1036979	5.52915	1.4225	2.69521	1.95863	5e-05	0.000136014	up	30812	-	MIM:605923|HGNC:HGNC:11203|Ensembl:ENSG00000005513|HPRD:16175|Vega:OTTHUMG00000122101	16	16p13.3	SRY-box 8		GO:0044798(nuclear transcription factor complex)//GO:0005634(nucleus)//GO:0005737(cytoplasm)	GO:0000981(RNA polymerase II transcription factor activity, sequence-specific DNA binding)//GO:0000979(RNA polymerase II core promoter sequence-specific DNA binding)//GO:0008134(transcription factor binding)//GO:0046982(protein heterodimerization activity)//GO:0003677(DNA binding)	GO:0008584(male gonad development)//GO:0046533(negative regulation of photoreceptor cell differentiation)//GO:0048709(oligodendrocyte differentiation)//GO:0007283(spermatogenesis)//GO:0072034(renal vesicle induction)//GO:0072197(ureter morphogenesis)//GO:0043066(negative regulation of apoptotic process)//GO:0033690(positive regulation of osteoblast proliferation)//GO:0045444(fat cell differentiat…
ITGA2B	ENSG00000005961	protein_coding	-	chr17:42449547-42466873	3.2626	1.58093	1.65158	1.04525	0.037	0.0580149	up	3674	BDPLT16|BDPLT2|CD41|CD41B|GP2B|GPIIb|GT|GTA|HPA3|PPP1R93	MIM:607759|HGNC:HGNC:6138|Ensembl:ENSG00000005961|HPRD:06377|Vega:OTTHUMG00000177935	17	17q21.32	integrin subunit alpha 2b	hsa04015(Rap1 signaling pathway)//hsa04151(PI3K-Akt signaling pathway)//hsa04510(Focal adhesion)//hsa04512(ECM-receptor interaction)//hsa04611(Platelet activation)//hsa04640(Hematopoietic cell lineage)//hsa04810(Regulation of actin cytoskeleton)//hsa05200(Pathways in cancer)//hsa05222(Small cell lung cancer)//hsa05410(Hypertrophic cardiomyopathy (HCM))//hsa05412(Arrhythmogenic right ventricular c…	GO:0009897(external side of plasma membrane)//GO:0005887(integral component of plasma membrane)//GO:0009986(cell surface)//GO:0031092(platelet alpha granule membrane)//GO:0005886(plasma membrane)//GO:0070062(extracellular exosome)//GO:0008305(integrin complex)//GO:0072562(blood microparticle)//GO:0005925(focal adhesion)	GO:0050840(extracellular matrix binding)//GO:0070051(fibrinogen binding)//GO:0046872(metal ion binding)//GO:0005515(protein binding)//GO:0042802(identical protein binding)	GO:0030168(platelet activation)//GO:0007411(axon guidance)//GO:0002576(platelet degranulation)//GO:0070527(platelet aggregation)//GO:0007596(blood coagulation)//GO:0007155(cell adhesion)//GO:0002687(positive regulation of leukocyte migration)//GO:0030198(extracellular matrix organization)//GO:0007229(integrin-mediated signaling pathway)//GO:0007160(cell-matrix adhesion)
C19orf60	ENSG00000006015	protein_coding	+	chr19:18682539-18731849	22.4427	9.94779	2.14132	1.1738	5e-05	0.000136014	up	55049	-	HGNC:HGNC:26098|Ensembl:ENSG00000006015|HPRD:07948|Vega:OTTHUMG00000183112	19	19p13.11	chromosome 19 open reading frame 60			GO:0005515(protein binding)
CRLF1	ENSG00000006016	protein_coding	-	chr19:18682539-18731849	132.14	15.3891	8.12369	3.10209	5e-05	0.000136014	up	9244	CISS|CISS1|CLF|CLF-1|NR6|zcytor5	MIM:604237|HGNC:HGNC:2364|Ensembl:ENSG00000006016|HPRD:09177|Vega:OTTHUMG00000183111	19	19p12	cytokine receptor-like factor 1		GO:0097058(CRLF-CLCF1 complex)//GO:0005576(extracellular region)//GO:0005615(extracellular space)	GO:0005127(ciliary neurotrophic factor receptor binding)//GO:0005125(cytokine activity)//GO:0004872(receptor activity)//GO:0046982(protein heterodimerization activity)//GO:0019955(cytokine binding)//GO:0005515(protein binding)	GO:0043524(negative regulation of neuron apoptotic process)//GO:0008284(positive regulation of cell proliferation)//GO:0001657(ureteric bud development)//GO:2000672(negative regulation of motor neuron apoptotic process)//GO:0042517(positive regulation of tyrosine phosphorylation of Stat3 protein)
TAC1	ENSG00000006128	protein_coding	+	chr7:97361219-97369784	8.49175	1.01673	4.70651	3.06212	5e-05	0.000136014	up	6863	Hs.2563|NK2|NKNA|NPK|TAC2	MIM:162320|HGNC:HGNC:11517|Ensembl:ENSG00000006128|HPRD:08876|Vega:OTTHUMG00000154069	7	7q21-q22	tachykinin precursor 1		GO:0005886(plasma membrane)//GO:0005576(extracellular region)//GO:0030424(axon)//GO:0005829(cytosol)//GO:0005615(extracellular space)//GO:0043025(neuronal cell body)	GO:0005102(receptor binding)//GO:0005515(protein binding)//GO:0031835(substance P receptor binding)	GO:1990090(cellular response to nerve growth factor stimulus)//GO:0010459(negative regulation of heart rate)//GO:0050829(defense response to Gram-negative bacterium)//GO:0019731(antibacterial humoral response)//GO:0007204(positive regulation of cytosolic calcium ion concentration)//GO:2000854(positive regulation of corticosterone secretion)//GO:0043278(response to morphine)//GO:0007268(synaptic t…
DLX6	ENSG00000006377	protein_coding	+	chr7:96584452-96643377	3.26357	0.87724	2.27119	1.89541	0.0022	0.00456006	up	1750	-	MIM:600030|HGNC:HGNC:2919|Ensembl:ENSG00000006377|HPRD:02493|Vega:OTTHUMG00000154201	7	7q22	distal-less homeobox 6		GO:0005634(nucleus)	GO:0043565(sequence-specific DNA binding)//GO:0003700(transcription factor activity, sequence-specific DNA binding)	GO:0042472(inner ear morphogenesis)//GO:0060021(palate development)//GO:0030326(embryonic limb morphogenesis)//GO:0001501(skeletal system development)//GO:0050679(positive regulation of epithelial cell proliferation)//GO:0030855(epithelial cell differentiation)//GO:0048646(anatomical structure formation involved in morphogenesis)//GO:0007399(nervous system development)//GO:0006355(regulation of t…
PHTF2	ENSG00000006576	protein_coding	+	chr7:77428121-77586818	16.3186	4.59462	3.09558	1.8285	5e-05	0.000136014	up	57157	-	MIM:616785|HGNC:HGNC:13411|Ensembl:ENSG00000006576|HPRD:15130|Vega:OTTHUMG00000155557	7	7q11.23-q21	putative homeodomain transcription factor 2		GO:0005783(endoplasmic reticulum)//GO:0005634(nucleus)	GO:0003677(DNA binding)	GO:0006351(transcription, DNA-templated)//GO:0006355(regulation of transcription, DNA-templated)
ELAC2	ENSG00000006744	protein_coding	-	chr17:12895707-12921504	39.2131	9.72506	3.74945	2.01156	5e-05	0.000136014	up	60528	COXPD17|ELC2|HPC2	MIM:605367|HGNC:HGNC:14198|HPRD:05641	17	17p11.2	elaC ribonuclease Z 2	hsa03013(RNA transport)	GO:0042645(mitochondrial nucleoid)//GO:0005654(nucleoplasm)//GO:0005634(nucleus)//GO:0005759(mitochondrial matrix)//GO:0005739(mitochondrion)	GO:0044822(poly(A) RNA binding)//GO:0004519(endonuclease activity)//GO:0046872(metal ion binding)	GO:0072684(mitochondrial tRNA 3'-trailer cleavage, endonucleolytic)//GO:0010467(gene expression)//GO:0090646(mitochondrial tRNA processing)//GO:0008033(tRNA processing)
NOS2	ENSG00000007171	protein_coding	-	chr17:26083791-26221778	2.20588	0.467216	2.18501	2.23919	0.00015	0.000384245	up	4843	HEP-NOS|INOS|NOS|NOS2A	MIM:163730|HGNC:HGNC:7873|Ensembl:ENSG00000007171|HPRD:01225|Vega:OTTHUMG00000132445	17	17q11.2	nitric oxide synthase 2		GO:0005777(peroxisome)//GO:0030863(cortical cytoskeleton)//GO:0048471(perinuclear region of cytoplasm)//GO:0005829(cytosol)//GO:0005622(intracellular)//GO:0005634(nucleus)//GO:0005737(cytoplasm)	GO:0042803(protein homodimerization activity)//GO:0005102(receptor binding)//GO:0010181(FMN binding)//GO:0005516(calmodulin binding)//GO:0005506(iron ion binding)//GO:0034618(arginine binding)//GO:0034617(tetrahydrobiopterin binding)//GO:0050661(NADP binding)//GO:0020037(heme binding)//GO:0050660(flavin adenine dinucleotide binding)//GO:0005515(protein binding)//GO:0004517(nitric-oxide synthase a…	GO:0055114(oxidation-reduction process)//GO:0031284(positive regulation of guanylate cyclase activity)//GO:0050829(defense response to Gram-negative bacterium)//GO:0072606(interleukin-8 secretion)//GO:0042177(negative regulation of protein catabolic process)//GO:0045454(cell redox homeostasis)//GO:0007623(circadian rhythm)//GO:0072604(interleukin-6 secretion)//GO:0001912(positive regulation of le…
ST7L	ENSG00000007341	protein_coding	-	chr1:113009162-113214241	15.88	5.60636	2.55511	1.50207	5e-05	0.000136014	up	54879	FAM4B|ST7R|STLR	HGNC:HGNC:18441|Ensembl:ENSG00000007341|HPRD:18112|Vega:OTTHUMG00000011753	1	1p13.2	suppression of tumorigenicity 7 like		GO:0016021(integral component of membrane)		GO:0030308(negative regulation of cell growth)
ADAM22	ENSG00000008277	protein_coding	+	chr7:87563457-87832204	17.651	7.09031	2.30535	1.31583	5e-05	0.000136014	up	53616	ADAM 22|MDC2	MIM:603709|HGNC:HGNC:201|Ensembl:ENSG00000008277|HPRD:04751|Vega:OTTHUMG00000137417	7	7q21	ADAM metallopeptidase domain 22		GO:0016021(integral component of membrane)//GO:0030424(axon)//GO:0005886(plasma membrane)	GO:0005515(protein binding)//GO:0008270(zinc ion binding)//GO:0004222(metalloendopeptidase activity)//GO:0005178(integrin binding)	GO:0007162(negative regulation of cell adhesion)//GO:0022011(myelination in peripheral nervous system)//GO:0007155(cell adhesion)//GO:0006508(proteolysis)//GO:0008344(adult locomotory behavior)//GO:0007417(central nervous system development)
UBE3C	ENSG00000009335	protein_coding	+	chr7:156931606-157062066	27.5068	13.6168	1.95028	1.0144	5e-05	0.000136014	up	9690	HECTH2	MIM:614454|HGNC:HGNC:16803|Ensembl:ENSG00000009335|HPRD:15604|Vega:OTTHUMG00000157239	7	7q36.3	ubiquitin protein ligase E3C	hsa04120(Ubiquitin mediated proteolysis)	GO:0005622(intracellular)//GO:0005634(nucleus)//GO:0000502(proteasome complex)	GO:0016874(ligase activity)//GO:0004842(ubiquitin-protein transferase activity)//GO:0005515(protein binding)	GO:0000209(protein polyubiquitination)//GO:0042787(protein ubiquitination involved in ubiquitin-dependent protein catabolic process)
POMT2	ENSG00000009830	protein_coding	-	chr14:77741298-77797940	23.9806	1.797	8.93121	3.7382	5e-05	0.000136014	up	29954	LGMD2N|MDDGA2|MDDGB2|MDDGC2	MIM:607439|HGNC:HGNC:19743|Ensembl:ENSG00000009830|HPRD:09592|Vega:OTTHUMG00000171556	14	14q24	protein O-mannosyltransferase 2	hsa00514(Other types of O-glycan biosynthesis)	GO:0016021(integral component of membrane)//GO:0031502(dolichyl-phosphate-mannose-protein mannosyltransferase complex)	GO:0004169(dolichyl-phosphate-mannose-protein mannosyltransferase activity)//GO:0046872(metal ion binding)//GO:0000030(mannosyltransferase activity)	GO:0035269(protein O-linked mannosylation)//GO:1900101(regulation of endoplasmic reticulum unfolded protein response)//GO:0006493(protein O-linked glycosylation)//GO:0097502(mannosylation)//GO:0007275(multicellular organism development)//GO:0044845(chain elongation of O-linked mannose residue)//GO:0000032(cell wall mannoprotein biosynthetic process)
LRRC23	ENSG00000010626	protein_coding	+	chr12:6976282-7032861	15.1798	3.68324	3.45483	2.04311	5e-05	0.000136014	up	10233	LRPB7	HGNC:HGNC:19138|Ensembl:ENSG00000010626|HPRD:09818|Vega:OTTHUMG00000156668	12	12p13	leucine rich repeat containing 23		GO:0005575(cellular_component)	GO:0003674(molecular_function)	GO:0008150(biological_process)
BTK	ENSG00000010671	protein_coding	-	chrX:100604434-100641183	4.36356	1.61504	2.05104	1.43394	0.00735	0.0136657	up	695	AGMX1|AT|ATK|BPK|IMD1|PSCTK1|XLA	MIM:300300|HGNC:HGNC:1133|Ensembl:ENSG00000010671|HPRD:02248|Vega:OTTHUMG00000022022	X	Xq21.33-q22	Bruton tyrosine kinase	hsa04064(NF-kappa B signaling pathway)//hsa04380(Osteoclast differentiation)//hsa04611(Platelet activation)//hsa04662(B cell receptor signaling pathway)//hsa04664(Fc epsilon RI signaling pathway)//hsa05340(Primary immunodeficiency)	GO:0005886(plasma membrane)//GO:0005829(cytosol)//GO:0043231(intracellular membrane-bounded organelle)//GO:0045121(membrane raft)//GO:0031410(cytoplasmic vesicle)//GO:0005634(nucleus)//GO:0031234(extrinsic component of cytoplasmic side of plasma membrane)//GO:0005737(cytoplasm)	GO:0004713(protein tyrosine kinase activity)//GO:0005524(ATP binding)//GO:0042802(identical protein binding)//GO:0004715(non-membrane spanning protein tyrosine kinase activity)//GO:0005547(phosphatidylinositol-3,4,5-trisphosphate binding)//GO:0046872(metal ion binding)//GO:0005515(protein binding)//GO:0005102(receptor binding)	GO:0007249(I-kappaB kinase/NF-kappaB signaling)//GO:0007169(transmembrane receptor protein tyrosine kinase signaling pathway)//GO:0045579(positive regulation of B cell differentiation)//GO:0034142(toll-like receptor 4 signaling pathway)//GO:0001818(negative regulation of cytokine production)//GO:0042113(B cell activation)//GO:0002721(regulation of B cell cytokine production)//GO:0019722(calcium-m…
MKS1	ENSG00000011143	protein_coding	-	chr17:56282802-56345879	10.3065	3.15466	2.7214	1.70799	5e-05	0.000136014	up	54903	BBS13|MES|MKS|POC12	MIM:609883|HGNC:HGNC:7121|Ensembl:ENSG00000011143|HPRD:07900|Vega:OTTHUMG00000133714	17	17q22	Meckel syndrome, type 1		GO:0036038(TCTN-B9D complex)//GO:0016020(membrane)//GO:0005829(cytosol)//GO:0005813(centrosome)//GO:0005814(centriole)//GO:0036064(ciliary basal body)//GO:0005737(cytoplasm)	GO:0005515(protein binding)	GO:0042384(cilium assembly)//GO:0042733(embryonic digit morphogenesis)//GO:1901620(regulation of smoothened signaling pathway involved in dorsal/ventral neural tube patterning)//GO:1990403(embryonic brain development)//GO:2000095(regulation of Wnt signaling pathway, planar cell polarity pathway)//GO:0006996(organelle organization)//GO:0061009(common bile duct development)//GO:0048754(branching mo…
UTP18	ENSG00000011260	protein_coding	+	chr17:49337888-49375297	7.35389	2.95164	2.11403	1.31699	5e-05	0.000136014	up	51096	CGI-48|WDR50	MIM:612816|HGNC:HGNC:24274|Ensembl:ENSG00000011260|Vega:OTTHUMG00000162370	17	17q21.33	UTP18, small subunit processome component	hsa03008(Ribosome biogenesis in eukaryotes)	GO:0005730(nucleolus)//GO:0016021(integral component of membrane)//GO:0005634(nucleus)//GO:0032040(small-subunit processome)//GO:0034388(Pwp2p-containing subcomplex of 90S preribosome)	GO:0044822(poly(A) RNA binding)	GO:0006364(rRNA processing)
DCN	ENSG00000011465	protein_coding	-	chr12:91539024-91576900	5901.2	1431.53	4.12012	2.04345	5e-05	0.000136014	up	1634	CSCD|DSPG2|PG40|PGII|PGS2|SLRR1B	MIM:125255|HGNC:HGNC:2705|Ensembl:ENSG00000011465|HPRD:00501	12	12q21.33	decorin	hsa04350(TGF-beta signaling pathway)//hsa05205(Proteoglycans in cancer)	GO:0005589(collagen type VI trimer)//GO:0005576(extracellular region)//GO:0005796(Golgi lumen)//GO:0043202(lysosomal lumen)//GO:0031012(extracellular matrix)//GO:0005615(extracellular space)//GO:0005737(cytoplasm)	GO:0004860(protein kinase inhibitor activity)//GO:0005518(collagen binding)//GO:0047485(protein N-terminus binding)//GO:0050840(extracellular matrix binding)//GO:0044822(poly(A) RNA binding)//GO:0005539(glycosaminoglycan binding)	GO:1904030(negative regulation of cyclin-dependent protein kinase activity)//GO:0030208(dermatan sulfate biosynthetic process)//GO:0022617(extracellular matrix disassembly)//GO:0051901(positive regulation of mitochondrial depolarization)//GO:0042060(wound healing)//GO:0005975(carbohydrate metabolic process)//GO:0001822(kidney development)//GO:0016525(negative regulation of angiogenesis)//GO:00302…
CD22	ENSG00000012124	protein_coding	+	chr19:35810163-35838264	3.43764	1.45013	1.81119	1.24523	0.00055	0.00128077	up	933	SIGLEC-2|SIGLEC2	MIM:107266|HGNC:HGNC:1643|Ensembl:ENSG00000012124|HPRD:00114|Vega:OTTHUMG00000183298	19	19q13.1	CD22 molecule	hsa04514(Cell adhesion molecules (CAMs))//hsa04640(Hematopoietic cell lineage)//hsa04662(B cell receptor signaling pathway)	GO:0009897(external side of plasma membrane)//GO:0016021(integral component of membrane)//GO:0005887(integral component of plasma membrane)//GO:0005886(plasma membrane)//GO:0070062(extracellular exosome)	GO:0030246(carbohydrate binding)//GO:0005515(protein binding)	GO:0007155(cell adhesion)
KDM5D	ENSG00000012817	protein_coding	-	chrY:21865750-21906825	37.477	0.362448	28.2411	6.69209	5e-05	0.000136014	up	8284	HY|HYA|JARID1D|SMCY	MIM:426000|HGNC:HGNC:11115|Ensembl:ENSG00000012817|HPRD:02464|Vega:OTTHUMG00000036508	Y	Yq11	lysine demethylase 5D		GO:0005575(cellular_component)//GO:0005654(nucleoplasm)//GO:0005634(nucleus)	GO:0016706(oxidoreductase activity, acting on paired donors, with incorporation or reduction of molecular oxygen, 2-oxoglutarate as one donor, and incorporation of one atom each of oxygen into both donors)//GO:0008270(zinc ion binding)//GO:0003677(DNA binding)//GO:0032453(histone demethylase activity (H3-K4 specific))	GO:0055114(oxidation-reduction process)//GO:0002457(T cell antigen processing and presentation)//GO:0034720(histone H3-K4 demethylation)//GO:0006325(chromatin organization)
CALCOCO1	ENSG00000012822	protein_coding	-	chr12:54104901-54125008	105.455	46.3375	2.24885	1.18637	5e-05	0.000136014	up	57658	Cocoa|PP13275|calphoglin	HGNC:HGNC:29306|Ensembl:ENSG00000012822|HPRD:13868|Vega:OTTHUMG00000170095	12	12q13.13	calcium binding and coiled-coil domain 1		GO:0043231(intracellular membrane-bounded organelle)//GO:0005634(nucleus)//GO:0005737(cytoplasm)//GO:0000790(nuclear chromatin)	GO:0030374(ligand-dependent nuclear receptor transcription coactivator activity)//GO:0003712(transcription cofactor activity)//GO:0008013(beta-catenin binding)//GO:0043565(sequence-specific DNA binding)//GO:0001047(core promoter binding)//GO:0003682(chromatin binding)//GO:0044212(transcription regulatory region DNA binding)//GO:0070016(armadillo repeat domain binding)//GO:0005515(protein binding)…	GO:0030518(intracellular steroid hormone receptor signaling pathway)//GO:0016055(Wnt signaling pathway)//GO:0006351(transcription, DNA-templated)//GO:0045944(positive regulation of transcription from RNA polymerase II promoter)//GO:0007165(signal transduction)//GO:0045893(positive regulation of transcription, DNA-templated)
RWDD2A	ENSG00000013392	protein_coding	+	chr6:83777384-83908651	2.47537	0.836623	1.89226	1.56499	0.0001	0.00026153	up	112611	RWDD2|dJ747H23.2	HGNC:HGNC:21385|HPRD:15287	6	6q14.2	RWD domain containing 2A
DDX11	ENSG00000013573	protein_coding	+	chr12:31173696-31257725	25.6148	8.9289	2.68054	1.52042	5e-05	0.000136014	up	1663	CHL1|CHLR1|KRG2|WABS	MIM:601150|HGNC:HGNC:2736|Ensembl:ENSG00000013573|HPRD:03095|Vega:OTTHUMG00000168435	12	12p11	DEAD/H-box helicase 11		GO:0070062(extracellular exosome)//GO:0000790(nuclear chromatin)//GO:0030496(midbody)//GO:0005654(nucleoplasm)//GO:0005730(nucleolus)//GO:0005634(nucleus)//GO:0000922(spindle pole)	GO:0003676(nucleic acid binding)//GO:0008026(ATP-dependent helicase activity)//GO:0005524(ATP binding)//GO:0003723(RNA binding)//GO:0051539(4 iron, 4 sulfur cluster binding)//GO:0004003(ATP-dependent DNA helicase activity)//GO:0008094(DNA-dependent ATPase activity)//GO:0004386(helicase activity)//GO:0003697(single-stranded DNA binding)//GO:0046872(metal ion binding)//GO:0005515(protein binding)//…	GO:0044267(cellular protein metabolic process)//GO:0008152(metabolic process)//GO:0030968(endoplasmic reticulum unfolded protein response)//GO:0032508(DNA duplex unwinding)//GO:0036498(IRE1-mediated unfolded protein response)//GO:0016032(viral process)//GO:0007062(sister chromatid cohesion)//GO:0006139(nucleobase-containing compound metabolic process)
MTMR11	ENSG00000014914	protein_coding	-	chr1:149900542-149908791	37.7977	16.8444	2.17422	1.16603	5e-05	0.000136014	up	10903	CRA	HGNC:HGNC:24307|Ensembl:ENSG00000014914|HPRD:16748|Vega:OTTHUMG00000012207	1	1q21.2	myotubularin related protein 11		GO:0070062(extracellular exosome)
RGPD5	ENSG00000015568	protein_coding	+	chr2:110550334-110615272	8.71066	1.75654	3.52277	2.31005	5e-05	0.000136014	up	84220	BS-63|BS63|HEL161|RGP5	MIM:612708|HGNC:HGNC:32418|Ensembl:ENSG00000015568|HPRD:04128|Vega:OTTHUMG00000130985	2	2q13	RANBP2-like and GRIP domain containing 5	hsa03013(RNA transport)	GO:0005737(cytoplasm)		GO:0000042(protein targeting to Golgi)
ZNF582	ENSG00000018869	protein_coding	-	chr19:56732680-56904914	4.11352	1.24689	2.27582	1.72204	5e-05	0.000136014	up	147948	-	MIM:615600|HGNC:HGNC:26421|Ensembl:ENSG00000018869|HPRD:15859|Vega:OTTHUMG00000181939	19	19q13.43	zinc finger protein 582		GO:0005622(intracellular)//GO:0005634(nucleus)	GO:0003676(nucleic acid binding)//GO:0046872(metal ion binding)//GO:0003677(DNA binding)	GO:0006351(transcription, DNA-templated)//GO:0006355(regulation of transcription, DNA-templated)
MARCO	ENSG00000019169	protein_coding	+	chr2:119699741-119752236	2.46876	0	3.46876	inf	5e-05	0.000136014	up	8685	SCARA2	MIM:604870|HGNC:HGNC:6895|Ensembl:ENSG00000019169|HPRD:05337|Vega:OTTHUMG00000131400	2	2q14.2	macrophage receptor with collagenous structure	hsa04145(Phagosome)	GO:0005886(plasma membrane)//GO:0005581(collagen trimer)//GO:0005887(integral component of plasma membrane)//GO:0030666(endocytic vesicle membrane)	GO:0005044(scavenger receptor activity)//GO:0008329(signaling pattern recognition receptor activity)//GO:0004888(transmembrane signaling receptor activity)	GO:0007166(cell surface receptor signaling pathway)//GO:0043277(apoptotic cell clearance)//GO:0002221(pattern recognition receptor signaling pathway)//GO:0045087(innate immune response)//GO:0006898(receptor-mediated endocytosis)
SYT13	ENSG00000019505	protein_coding	-	chr11:45261851-45307870	1.44264	0	2.44264	inf	5e-05	0.000136014	up	57586	-	MIM:607716|HGNC:HGNC:14962|Ensembl:ENSG00000019505|HPRD:12128|Vega:OTTHUMG00000166504	11	11p11.2	synaptotagmin 13		GO:0030133(transport vesicle)//GO:0043231(intracellular membrane-bounded organelle)//GO:0005887(integral component of plasma membrane)	GO:0005544(calcium-dependent phospholipid binding)//GO:0030276(clathrin binding)//GO:0019905(syntaxin binding)//GO:0005509(calcium ion binding)	GO:0016192(vesicle-mediated transport)
ZFP64	ENSG00000020256	protein_coding	-	chr20:50668201-50820847	7.33931	3.14755	2.01066	1.22141	5e-05	0.000136014	up	55734	ZNF338	HGNC:HGNC:15940|Ensembl:ENSG00000020256|HPRD:15728|Vega:OTTHUMG00000032756	20	20q13.2	ZFP64 zinc finger protein		GO:0005634(nucleus)	GO:0003676(nucleic acid binding)//GO:0046872(metal ion binding)//GO:0005515(protein binding)//GO:0003677(DNA binding)	GO:0048026(positive regulation of mRNA splicing, via spliceosome)//GO:0006351(transcription, DNA-templated)//GO:0006355(regulation of transcription, DNA-templated)
CYP3A43	ENSG00000021461	protein_coding	+	chr7:99425635-99463718	1.83156	0.166476	2.42745	3.45969	0.0405	0.0628484	up	64816	-	MIM:606534|HGNC:HGNC:17450|Ensembl:ENSG00000021461|HPRD:05942|Vega:OTTHUMG00000156498	7	7q21.1	cytochrome P450 family 3 subfamily A member 43	hsa05204(Chemical carcinogenesis)	GO:0016021(integral component of membrane)//GO:0005789(endoplasmic reticulum membrane)	GO:0004497(monooxygenase activity)//GO:0005506(iron ion binding)//GO:0016705(oxidoreductase activity, acting on paired donors, with incorporation or reduction of molecular oxygen)//GO:0070330(aromatase activity)//GO:0020037(heme binding)	GO:0055114(oxidation-reduction process)//GO:0006805(xenobiotic metabolic process)//GO:0044281(small molecule metabolic process)
GLRX2	ENSG00000023572	protein_coding	-	chr1:193065597-193075244	3.28702	0.888471	2.2701	1.88738	0.00055	0.00128077	up	51022	CGI-133|GRX2	MIM:606820|HGNC:HGNC:16065|Ensembl:ENSG00000023572|HPRD:12112|Vega:OTTHUMG00000035677	1	1q31.2	glutaredoxin 2		GO:0030425(dendrite)//GO:0043231(intracellular membrane-bounded organelle)//GO:0005759(mitochondrial matrix)//GO:0005739(mitochondrion)//GO:0005654(nucleoplasm)//GO:0005634(nucleus)//GO:0043025(neuronal cell body)	GO:0015038(glutathione disulfide oxidoreductase activity)//GO:0008794(arsenate reductase (glutaredoxin) activity)//GO:0009055(electron carrier activity)//GO:0003756(protein disulfide isomerase activity)//GO:0051537(2 iron, 2 sulfur cluster binding)//GO:0015035(protein disulfide oxidoreductase activity)//GO:0046872(metal ion binding)	GO:0055114(oxidation-reduction process)//GO:0071451(cellular response to superoxide)//GO:0007568(aging)//GO:0042542(response to hydrogen peroxide)//GO:0051775(response to redox state)//GO:0030154(cell differentiation)//GO:0009266(response to temperature stimulus)//GO:0042262(DNA protection)//GO:0009966(regulation of signal transduction)//GO:0006457(protein folding)//GO:0045454(cell redox homeosta…
SEC63	ENSG00000025796	protein_coding	-	chr6:108188959-108281190	40.913	18.626	2.13559	1.13524	5e-05	0.000136014	up	11231	DNAJC23|ERdj2|PRO2507|SEC63L	MIM:608648|HGNC:HGNC:21082|Ensembl:ENSG00000025796|HPRD:09783|Vega:OTTHUMG00000015316	6	6q21	SEC63 homolog, protein translocation regulator	hsa03060(Protein export)//hsa04141(Protein processing in endoplasmic reticulum)	GO:0005783(endoplasmic reticulum)//GO:0016020(membrane)//GO:0016021(integral component of membrane)//GO:0005789(endoplasmic reticulum membrane)//GO:0005829(cytosol)	GO:0004872(receptor activity)//GO:0044822(poly(A) RNA binding)//GO:0005515(protein binding)	GO:0006807(nitrogen compound metabolic process)//GO:0044267(cellular protein metabolic process)//GO:0030968(endoplasmic reticulum unfolded protein response)//GO:0001889(liver development)//GO:0072001(renal system development)//GO:0006614(SRP-dependent cotranslational protein targeting to membrane)//GO:0036498(IRE1-mediated unfolded protein response)//GO:0010259(multicellular organism aging)//GO:0…
AGPAT4	ENSG00000026652	protein_coding	-	chr6:161551010-161695093	29.5092	12.9731	2.18342	1.18564	5e-05	0.000136014	up	56895	1-AGPAT4|LPAAT-delta|dJ473J16.2	MIM:614795|HGNC:HGNC:20885|Ensembl:ENSG00000026652|HPRD:12437|Vega:OTTHUMG00000015966	6	6q26	1-acylglycerol-3-phosphate O-acyltransferase 4	hsa00561(Glycerolipid metabolism)//hsa00564(Glycerophospholipid metabolism)//	GO:0016021(integral component of membrane)//GO:0005789(endoplasmic reticulum membrane)	GO:0005515(protein binding)//GO:0016746(transferase activity, transferring acyl groups)//GO:0003841(1-acylglycerol-3-phosphate O-acyltransferase activity)	GO:0044255(cellular lipid metabolic process)//GO:0006644(phospholipid metabolic process)//GO:0008152(metabolic process)//GO:0008654(phospholipid biosynthetic process)//GO:0016024(CDP-diacylglycerol biosynthetic process)//GO:0006654(phosphatidic acid biosynthetic process)//GO:0019432(triglyceride biosynthetic process)//GO:0046474(glycerophospholipid biosynthetic process)//GO:0044281(small molecule…
IBSP	ENSG00000029559	protein_coding	+	chr4:88720732-88733074	63.7545	8.79521	6.61083	2.85774	5e-05	0.000136014	up	3381	BNSP|BSP|BSP-II|SP-II	MIM:147563|HGNC:HGNC:5341|Ensembl:ENSG00000029559|HPRD:00951|Vega:OTTHUMG00000130600	4	4q21.1	integrin binding sialoprotein	hsa04151(PI3K-Akt signaling pathway)//hsa04510(Focal adhesion)//hsa04512(ECM-receptor interaction)	GO:0031988(membrane-bounded vesicle)//GO:0016020(membrane)//GO:0005576(extracellular region)//GO:0005615(extracellular space)//GO:0031012(extracellular matrix)	GO:0003674(molecular_function)	GO:0071363(cellular response to growth factor stimulus)//GO:0001649(osteoblast differentiation)//GO:0030282(bone mineralization)//GO:0007155(cell adhesion)//GO:0030198(extracellular matrix organization)
ALG1	ENSG00000033011	protein_coding	+	chr16:4932507-5147809	4.41091	1.75256	1.96577	1.33161	0.0047	0.00911	up	56052	CDG1K|HMAT1|HMT-1|HMT1|MT-1|Mat-1|hMat-1	MIM:605907|HGNC:HGNC:18294|Ensembl:ENSG00000033011|HPRD:10437|Vega:OTTHUMG00000129529	16	16p13.3	ALG1, chitobiosyldiphosphodolichol beta-mannosyltransferase	hsa00510(N-Glycan biosynthesis)//	GO:0005783(endoplasmic reticulum)//GO:0016020(membrane)//GO:0016021(integral component of membrane)//GO:0005789(endoplasmic reticulum membrane)	GO:0004578(chitobiosyldiphosphodolichol beta-mannosyltransferase activity)//GO:0016757(transferase activity, transferring glycosyl groups)//GO:0000030(mannosyltransferase activity)	GO:0044267(cellular protein metabolic process)//GO:0008152(metabolic process)//GO:0009103(lipopolysaccharide biosynthetic process)//GO:0006488(dolichol-linked oligosaccharide biosynthetic process)//GO:0097502(mannosylation)//GO:0043687(post-translational protein modification)//GO:0018279(protein N-linked glycosylation via asparagine)//GO:0006486(protein glycosylation)
METTL1	ENSG00000037897	protein_coding	-	chr12:58156116-58212487	14.9534	3.50767	3.53917	2.09189	5e-05	0.000136014	up	4234	C12orf1|TRM8|TRMT8|YDL201w	MIM:604466|HGNC:HGNC:7030|Ensembl:ENSG00000037897|HPRD:06834|Vega:OTTHUMG00000150143	12	12q13	methyltransferase like 1		GO:0005654(nucleoplasm)//GO:0005634(nucleus)//GO:0043527(tRNA methyltransferase complex)//GO:0005737(cytoplasm)//GO:0005730(nucleolus)	GO:0008176(tRNA (guanine-N7-)-methyltransferase activity)//GO:0005515(protein binding)//GO:0000049(tRNA binding)	GO:0030488(tRNA methylation)//GO:0010467(gene expression)//GO:0006400(tRNA modification)//GO:0036265(RNA (guanine-N7)-methylation)//GO:0008033(tRNA processing)
VCAN	ENSG00000038427	protein_coding	+	chr5:82767283-82878122	221.256	45.2127	4.80941	2.29092	5e-05	0.000136014	up	1462	CSPG2|ERVR|GHAP|PG-M|WGN|WGN1	MIM:118661|HGNC:HGNC:2464|Ensembl:ENSG00000038427|HPRD:00340|Vega:OTTHUMG00000131321	5	5q14.3	versican	hsa04514(Cell adhesion molecules (CAMs))	GO:0005576(extracellular region)//GO:0005796(Golgi lumen)//GO:0016020(membrane)//GO:0043202(lysosomal lumen)//GO:0043231(intracellular membrane-bounded organelle)//GO:0005578(proteinaceous extracellular matrix)//GO:0031012(extracellular matrix)//GO:0005615(extracellular space)	GO:0019903(protein phosphatase binding)//GO:0005540(hyaluronic acid binding)//GO:0030246(carbohydrate binding)//GO:0005539(glycosaminoglycan binding)//GO:0005515(protein binding)//GO:0005509(calcium ion binding)	GO:0044281(small molecule metabolic process)//GO:0007507(heart development)//GO:0030208(dermatan sulfate biosynthetic process)//GO:0030198(extracellular matrix organization)//GO:0008037(cell recognition)//GO:0001501(skeletal system development)//GO:0007155(cell adhesion)//GO:0030206(chondroitin sulfate biosynthetic process)//GO:0001649(osteoblast differentiation)//GO:0007275(multicellular organis…
DNAH5	ENSG00000039139	protein_coding	-	chr5:13690439-13944652	1.5944	0.354457	1.91545	2.16933	0.00395	0.00779564	up	1767	CILD3|DNAHC5|HL1|KTGNR|PCD	MIM:603335|HGNC:HGNC:2950|Ensembl:ENSG00000039139|HPRD:04514|Vega:OTTHUMG00000090533	5	5p15.2	dynein, axonemal, heavy chain 5	hsa05016(Huntington's disease)	GO:0005575(cellular_component)//GO:0005874(microtubule)//GO:0005930(axoneme)//GO:0036157(outer dynein arm)	GO:0005524(ATP binding)//GO:0016887(ATPase activity)//GO:0003777(microtubule motor activity)	GO:0042384(cilium assembly)//GO:0008152(metabolic process)//GO:0007507(heart development)//GO:0030317(sperm motility)//GO:0021670(lateral ventricle development)//GO:0003341(cilium movement)//GO:0036158(outer dynein arm assembly)//GO:0008150(biological_process)//GO:0007368(determination of left/right symmetry)
SPDL1	ENSG00000040275	protein_coding	+	chr5:169010637-169031782	5.71078	1.49741	2.6871	1.93122	5e-05	0.000136014	up	54908	CCDC99	MIM:616401|HGNC:HGNC:26010|Ensembl:ENSG00000040275|HPRD:08623|Vega:OTTHUMG00000130438	5	5q35.1	spindle apparatus coiled-coil protein 1		GO:0005815(microtubule organizing center)//GO:0005634(nucleus)//GO:0000940(condensed chromosome outer kinetochore)//GO:0005829(cytosol)//GO:0000922(spindle pole)	GO:0043515(kinetochore binding)//GO:0019899(enzyme binding)//GO:0005515(protein binding)	GO:0007080(mitotic metaphase plate congression)//GO:0000132(establishment of mitotic spindle orientation)//GO:0051301(cell division)//GO:0000278(mitotic cell cycle)//GO:0007264(small GTPase mediated signal transduction)//GO:0034501(protein localization to kinetochore)//GO:0031577(spindle checkpoint)
CTNS	ENSG00000040531	protein_coding	+	chr17:3539761-3564836	9.67657	2.00314	3.55514	2.27224	5e-05	0.000136014	up	1497	CTNS-LSB|PQLC4	MIM:606272|HGNC:HGNC:2518|Ensembl:ENSG00000040531|HPRD:05885|Vega:OTTHUMG00000090693	17	17p13	cystinosin, lysosomal cystine transporter	hsa04142(Lysosome)	GO:0016021(integral component of membrane)//GO:0070062(extracellular exosome)//GO:0005886(plasma membrane)//GO:0045111(intermediate filament cytoskeleton)//GO:0005770(late endosome)//GO:0005765(lysosomal membrane)//GO:0043231(intracellular membrane-bounded organelle)//GO:0042470(melanosome)//GO:0005769(early endosome)//GO:0005764(lysosome)	GO:0015184(L-cystine transmembrane transporter activity)	GO:0007625(grooming behavior)//GO:0007616(long-term memory)//GO:0007628(adult walking behavior)//GO:0007420(brain development)//GO:0002088(lens development in camera-type eye)//GO:0008542(visual learning)//GO:0046034(ATP metabolic process)//GO:0042438(melanin biosynthetic process)//GO:0006520(cellular amino acid metabolic process)//GO:0050890(cognition)//GO:0055085(transmembrane transport)//GO:00…
CAPG	ENSG00000042493	protein_coding	-	chr2:85621870-85645555	32.3049	13.7297	2.26107	1.23445	5e-05	0.000136014	up	822	AFCP|HEL-S-66|MCP	MIM:153615|HGNC:HGNC:1474|Ensembl:ENSG00000042493|HPRD:01088|Vega:OTTHUMG00000130183	2	2p11.2	capping actin protein, gelsolin like		GO:0070062(extracellular exosome)//GO:0090543(Flemming body)//GO:0005814(centriole)//GO:0042470(melanosome)//GO:0005730(nucleolus)//GO:0005654(nucleoplasm)//GO:0008290(F-actin capping protein complex)//GO:0005634(nucleus)//GO:0005737(cytoplasm)//GO:0072686(mitotic spindle)	GO:0005515(protein binding)//GO:0003779(actin binding)//GO:0019904(protein domain specific binding)//GO:0032403(protein complex binding)	GO:0071803(positive regulation of podosome assembly)//GO:0006461(protein complex assembly)//GO:0022617(extracellular matrix disassembly)//GO:0051016(barbed-end actin filament capping)//GO:0030031(cell projection assembly)
TG	ENSG00000042832	protein_coding	+	chr8:133879202-134147147	3.05238	0.548472	2.61702	2.47644	5e-05	0.000136014	up	7038	AITD3|TGN	MIM:188450|HGNC:HGNC:11764|Ensembl:ENSG00000042832|HPRD:01782|Vega:OTTHUMG00000164649	8	8q24	thyroglobulin	hsa04918(Thyroid hormone synthesis)//hsa05320(Autoimmune thyroid disease)	GO:0048471(perinuclear region of cytoplasm)//GO:0005576(extracellular region)//GO:0043234(protein complex)//GO:0005794(Golgi apparatus)//GO:0005783(endoplasmic reticulum)//GO:0005615(extracellular space)	GO:0032403(protein complex binding)//GO:0042803(protein homodimerization activity)//GO:0052689(carboxylic ester hydrolase activity)//GO:0051087(chaperone binding)//GO:0043168(anion binding)//GO:0005179(hormone activity)	GO:0045056(transcytosis)//GO:0042403(thyroid hormone metabolic process)//GO:0031641(regulation of myelination)//GO:0032496(response to lipopolysaccharide)//GO:0009268(response to pH)//GO:0015705(iodide transport)//GO:0042446(hormone biosynthetic process)//GO:0030878(thyroid gland development)//GO:0007165(signal transduction)
GEMIN8	ENSG00000046647	protein_coding	-	chrX:14026397-14048012	8.0771	3.31011	2.106	1.28696	5e-05	0.000136014	up	54960	FAM51A1	MIM:300962|HGNC:HGNC:26044|HPRD:06533	X	Xp22.2	gem nuclear organelle associated protein 8	hsa03013(RNA transport)	GO:0005829(cytosol)//GO:0034719(SMN-Sm protein complex)//GO:0005737(cytoplasm)//GO:0097504(Gemini of coiled bodies)//GO:0005634(nucleus)//GO:0032797(SMN complex)	GO:0005515(protein binding)	GO:0000387(spliceosomal snRNP assembly)
GPM6B	ENSG00000046653	protein_coding	-	chrX:13789149-13956757	6.07241	1.62476	2.6945	1.90204	5e-05	0.000136014	up	2824	M6B	MIM:300051|HGNC:HGNC:4461|Ensembl:ENSG00000046653|HPRD:02082|Vega:OTTHUMG00000021162	X	Xp22.2	glycoprotein M6B		GO:0016021(integral component of membrane)//GO:0045121(membrane raft)//GO:0005886(plasma membrane)	GO:0003674(molecular_function)	GO:0051612(negative regulation of serotonin uptake)//GO:2000009(negative regulation of protein localization to cell surface)//GO:0032956(regulation of actin cytoskeleton organization)//GO:0030501(positive regulation of bone mineralization)//GO:0030154(cell differentiation)//GO:0051893(regulation of focal adhesion assembly)//GO:0001503(ossification)//GO:0007399(nervous system development)//GO:0015…
CP	ENSG00000047457	protein_coding	-	chr3:148847370-148939842	43.973	20.4011	2.10143	1.10797	5e-05	0.000136014	up	1356	CP-2	MIM:117700|HGNC:HGNC:2295|Ensembl:ENSG00000047457|HPRD:00317|Vega:OTTHUMG00000159563	3	3q23-q25	ceruloplasmin (ferroxidase)	hsa00860(Porphyrin and chlorophyll metabolism)	GO:0070062(extracellular exosome)//GO:0005576(extracellular region)//GO:0005623(cell)//GO:0005765(lysosomal membrane)//GO:0072562(blood microparticle)//GO:0005615(extracellular space)//GO:0046658(anchored component of plasma membrane)	GO:0005507(copper ion binding)//GO:0051087(chaperone binding)//GO:0004322(ferroxidase activity)	GO:0055114(oxidation-reduction process)//GO:0007568(aging)//GO:0046688(response to copper ion)//GO:0001889(liver development)//GO:0006879(cellular iron ion homeostasis)//GO:0007584(response to nutrient)//GO:0055085(transmembrane transport)//GO:0006825(copper ion transport)//GO:0030324(lung development)
WWC3	ENSG00000047644	protein_coding	+	chrX:9983601-10112518	8.59701	4.25537	1.82613	1.01455	0.00305	0.00615384	up	55841	BM042	HGNC:HGNC:29237|Ensembl:ENSG00000047644|HPRD:11136|Vega:OTTHUMG00000021123	X	Xp22.32	WWC family member 3		GO:0005829(cytosol)	GO:0019900(kinase binding)//GO:0032947(protein complex scaffold)	GO:0046621(negative regulation of organ growth)//GO:0035331(negative regulation of hippo signaling)//GO:0000122(negative regulation of transcription from RNA polymerase II promoter)
RRM2B	ENSG00000048392	protein_coding	-	chr8:103216729-103251346	18.757	9.30615	1.91701	1.01118	5e-05	0.000136014	up	50484	MTDPS8A|MTDPS8B|P53R2	MIM:604712|HGNC:HGNC:17296|Ensembl:ENSG00000048392|HPRD:05276|Vega:OTTHUMG00000164776	8	8q23.1	ribonucleotide reductase regulatory TP53 inducible subunit M2B	hsa00230(Purine metabolism)//hsa00240(Pyrimidine metabolism)//hsa00480(Glutathione metabolism)//	GO:0016021(integral component of membrane)//GO:0070062(extracellular exosome)//GO:0005971(ribonucleoside-diphosphate reductase complex)//GO:0005829(cytosol)//GO:0005739(mitochondrion)//GO:0005654(nucleoplasm)//GO:0005737(cytoplasm)	GO:0004748(ribonucleoside-diphosphate reductase activity, thioredoxin disulfide as acceptor)//GO:0016491(oxidoreductase activity)//GO:0005515(protein binding)//GO:0046872(metal ion binding)	GO:0055114(oxidation-reduction process)//GO:0003014(renal system process)//GO:0044281(small molecule metabolic process)//GO:0006979(response to oxidative stress)//GO:0009186(deoxyribonucleoside diphosphate metabolic process)//GO:0009200(deoxyribonucleoside triphosphate metabolic process)//GO:0006264(mitochondrial DNA replication)//GO:0010467(gene expression)//GO:1902254(negative regulation of int…
LMO3	ENSG00000048540	protein_coding	-	chr12:16500075-16763528	44.3858	11.9448	3.5061	1.89372	5e-05	0.000136014	up	55885	RBTN3|RBTNL2|RHOM3|Rhom-3	MIM:180386|HGNC:HGNC:6643|Ensembl:ENSG00000048540|HPRD:11832|Vega:OTTHUMG00000168837	12	12p12.3	LIM domain only 3		GO:0005737(cytoplasm)	GO:0008270(zinc ion binding)//GO:0005515(protein binding)	GO:0035360(positive regulation of peroxisome proliferator activated receptor signaling pathway)//GO:0045600(positive regulation of fat cell differentiation)//GO:0006351(transcription, DNA-templated)//GO:0070373(negative regulation of ERK1 and ERK2 cascade)//GO:0006355(regulation of transcription, DNA-templated)//GO:2000324(positive regulation of glucocorticoid receptor signaling pathway)
ERCC8	ENSG00000049167	protein_coding	-	chr5:60169657-60240900	4.9449	1.13037	2.79055	2.12915	5e-05	0.000136014	up	1161	CKN1|CSA|UVSS2	MIM:609412|HGNC:HGNC:3439|Ensembl:ENSG00000049167|HPRD:07523|Vega:OTTHUMG00000097741	5	5q12.1	excision repair cross-complementation group 8	hsa03420(Nucleotide excision repair)//hsa04120(Ubiquitin mediated proteolysis)	GO:0043234(protein complex)//GO:0000109(nucleotide-excision repair complex)//GO:0016363(nuclear matrix)//GO:0031464(Cul4A-RING E3 ubiquitin ligase complex)//GO:0005654(nucleoplasm)//GO:0005634(nucleus)	GO:0003678(DNA helicase activity)//GO:0004842(ubiquitin-protein transferase activity)//GO:0005515(protein binding)//GO:0008094(DNA-dependent ATPase activity)//GO:0032403(protein complex binding)	GO:0006283(transcription-coupled nucleotide-excision repair)//GO:0006979(response to oxidative stress)//GO:0006974(cellular response to DNA damage stimulus)//GO:0045739(positive regulation of DNA repair)//GO:0051865(protein autoubiquitination)//GO:0000209(protein polyubiquitination)//GO:0010165(response to X-ray)//GO:0043161(proteasome-mediated ubiquitin-dependent protein catabolic process)//GO:0…
ADAMTS6	ENSG00000049192	protein_coding	-	chr5:64444562-64777747	58.4447	18.115	3.10985	1.68989	5e-05	0.000136014	up	11174	ADAM-TS 6|ADAM-TS6|ADAMTS-6	MIM:605008|HGNC:HGNC:222|Ensembl:ENSG00000049192|HPRD:05421|Vega:OTTHUMG00000074079	5	5q12	ADAM metallopeptidase with thrombospondin type 1 motif 6		GO:0005578(proteinaceous extracellular matrix)	GO:0008237(metallopeptidase activity)//GO:0008270(zinc ion binding)//GO:0004222(metalloendopeptidase activity)	GO:0006508(proteolysis)//GO:0060976(coronary vasculature development)//GO:0035904(aorta development)//GO:0003279(cardiac septum development)
ELN	ENSG00000049540	protein_coding	+	chr7:73442118-73484237	153.581	73.1715	2.0841	1.06965	5e-05	0.000136014	up	2006	SVAS|WBS|WS	MIM:130160|HGNC:HGNC:3327|Ensembl:ENSG00000049540|HPRD:00556|Vega:OTTHUMG00000150229	7	7q11.23	elastin	hsa04974(Protein digestion and absorption)	GO:0005578(proteinaceous extracellular matrix)//GO:0005739(mitochondrion)//GO:0005576(extracellular region)//GO:0005615(extracellular space)//GO:0071953(elastic fiber)	GO:0005201(extracellular matrix structural constituent)//GO:0050840(extracellular matrix binding)//GO:0030023(extracellular matrix constituent conferring elasticity)//GO:0005515(protein binding)	GO:0007568(aging)//GO:0035904(aorta development)//GO:0071300(cellular response to retinoic acid)//GO:0055093(response to hyperoxia)//GO:0022617(extracellular matrix disassembly)//GO:0030198(extracellular matrix organization)//GO:0009887(organ morphogenesis)//GO:0071456(cellular response to hypoxia)//GO:0030833(regulation of actin filament polymerization)//GO:0008283(cell proliferation)//GO:000758…
PPP1R3F	ENSG00000049769	protein_coding	+	chrX:49126305-49157929	7.72493	1.77844	3.14023	2.11891	5e-05	0.000136014	up	89801	HB2E|R3F	HGNC:HGNC:14944|Ensembl:ENSG00000049769|HPRD:15170|Vega:OTTHUMG00000024139	X	Xp11.23	protein phosphatase 1 regulatory subunit 3F	hsa04910(Insulin signaling pathway)	GO:0016020(membrane)//GO:0016021(integral component of membrane)	GO:2001069(glycogen binding)//GO:0019903(protein phosphatase binding)	GO:0005979(regulation of glycogen biosynthetic process)//GO:2000465(regulation of glycogen (starch) synthase activity)
THOC3	ENSG00000051596	protein_coding	-	chr5:175333941-175461683	4.32366	2.00381	1.7723	1.10951	0.0017	0.00360319	up	84321	THO3|hTREX45	MIM:606929|HGNC:HGNC:19072|Ensembl:ENSG00000051596|HPRD:09497|Vega:OTTHUMG00000130658	5	5q35.2	THO complex 3	hsa03013(RNA transport)//hsa03040(Spliceosome)	GO:0000784(nuclear chromosome, telomeric region)//GO:0016021(integral component of membrane)//GO:0000445(THO complex part of transcription export complex)//GO:0016607(nuclear speck)//GO:0000346(transcription export complex)	GO:0003723(RNA binding)	GO:0006397(mRNA processing)//GO:0006406(mRNA export from nucleus)//GO:0008380(RNA splicing)//GO:0046784(viral mRNA export from host cell nucleus)
USE1	ENSG00000053501	protein_coding	+	chr19:17326154-17330638	17.8951	5.77508	2.78891	1.63165	5e-05	0.000136014	up	55850	D12|MDS032|P31|SLT1	MIM:610675|HGNC:HGNC:30882|Ensembl:ENSG00000053501|HPRD:11299|Vega:OTTHUMG00000182723	19	19p13.11	unconventional SNARE in the ER 1 homolog (S. cerevisiae)	hsa04130(SNARE interactions in vesicular transport)	GO:0005783(endoplasmic reticulum)//GO:0016021(integral component of membrane)//GO:0005789(endoplasmic reticulum membrane)//GO:0005764(lysosome)	GO:0005515(protein binding)	GO:0007041(lysosomal transport)//GO:0032940(secretion by cell)//GO:0060628(regulation of ER to Golgi vesicle-mediated transport)//GO:0030163(protein catabolic process)//GO:0006888(ER to Golgi vesicle-mediated transport)//GO:0015031(protein transport)//GO:0071786(endoplasmic reticulum tubular network organization)
PLEKHH1	ENSG00000054690	protein_coding	+	chr14:67913800-68067004	1.68927	0.435616	1.87325	1.95527	0.0049	0.00946864	up	57475	-	HGNC:HGNC:17733|Ensembl:ENSG00000054690|HPRD:17862|Vega:OTTHUMG00000171272	14	14q24.1	pleckstrin homology, MyTH4 and FERM domain containing H1		GO:0005856(cytoskeleton)
MCOLN3	ENSG00000055732	protein_coding	-	chr1:85464829-85598821	8.40312	0.205943	7.79732	5.3506	5e-05	0.000136014	up	55283	TRP-ML3|TRPML3	MIM:607400|HGNC:HGNC:13358|Ensembl:ENSG00000055732|HPRD:09585|Vega:OTTHUMG00000009955	1	1p22.3	mucolipin 3		GO:0016021(integral component of membrane)//GO:0005886(plasma membrane)//GO:0005737(cytoplasm)		GO:0055085(transmembrane transport)//GO:0070588(calcium ion transmembrane transport)//GO:0042491(auditory receptor cell differentiation)//GO:0007626(locomotory behavior)//GO:0034220(ion transmembrane transport)
DCBLD2	ENSG00000057019	protein_coding	-	chr3:98433173-98620533	10.9203	5.40952	1.85978	1.01344	5e-05	0.000136014	up	131566	CLCP1|ESDN	MIM:608698|HGNC:HGNC:24627|Ensembl:ENSG00000057019|HPRD:10567|Vega:OTTHUMG00000151985	3	3q12.1|3	discoidin, CUB and LCCL domain containing 2		GO:0005887(integral component of plasma membrane)//GO:0009986(cell surface)	GO:0005515(protein binding)	GO:0042060(wound healing)//GO:0030308(negative regulation of cell growth)//GO:0030522(intracellular receptor signaling pathway)
CAMK2B	ENSG00000058404	protein_coding	-	chr7:44256748-44374176	1.90032	0.265126	2.29251	2.84149	5e-05	0.000136014	up	816	CAM2|CAMK2|CAMKB	MIM:607707|HGNC:HGNC:1461|Ensembl:ENSG00000058404|HPRD:12127|Vega:OTTHUMG00000023491	7	7p14.3-p14.1	calcium/calmodulin-dependent protein kinase II beta	hsa04012(ErbB signaling pathway)//hsa04020(Calcium signaling pathway)//hsa04024(cAMP signaling pathway)//hsa04066(HIF-1 signaling pathway)//hsa04114(Oocyte meiosis)//hsa04261(Adrenergic signaling in cardiomyocytes)//hsa04310(Wnt signaling pathway)//hsa04713(Circadian entrainment)//hsa04720(Long-term potentiation)//hsa04722(Neurotrophin signaling pathway)//hsa04725(Cholinergic synapse)//hsa04728(D…	GO:0005886(plasma membrane)//GO:0043204(perikaryon)//GO:0005815(microtubule organizing center)//GO:0030425(dendrite)//GO:0005829(cytosol)//GO:0033017(sarcoplasmic reticulum membrane)//GO:0097481(neuronal postsynaptic density)//GO:0030666(endocytic vesicle membrane)//GO:0005654(nucleoplasm)//GO:0051233(spindle midzone)	GO:0004674(protein serine/threonine kinase activity)//GO:0019901(protein kinase binding)//GO:0042803(protein homodimerization activity)//GO:0005524(ATP binding)//GO:0005515(protein binding)//GO:0005516(calmodulin binding)//GO:0004683(calmodulin-dependent protein kinase activity)//GO:0004672(protein kinase activity)//GO:0043274(phospholipase binding)//GO:0003779(actin binding)	GO:0010976(positive regulation of neuron projection development)//GO:0060466(activation of meiosis involved in egg activation)//GO:0051823(regulation of synapse structural plasticity)//GO:0090129(positive regulation of synapse maturation)//GO:0000082(G1/S transition of mitotic cell cycle)//GO:0002030(inhibitory G-protein coupled receptor phosphorylation)//GO:0032430(positive regulation of phospho…
NDC1	ENSG00000058804	protein_coding	-	chr1:54231132-54304533	3.01635	1.37044	1.69435	1.13817	5e-05	0.000136014	up	55706	NET3|TMEM48	MIM:610115|HGNC:HGNC:25525|Ensembl:ENSG00000058804|HPRD:08547|Vega:OTTHUMG00000008073	1	1p32.3	NDC1 transmembrane nucleoporin	hsa03013(RNA transport)	GO:0005886(plasma membrane)//GO:0005635(nuclear envelope)//GO:0031965(nuclear membrane)//GO:0016020(membrane)//GO:0015629(actin cytoskeleton)//GO:0016021(integral component of membrane)//GO:0005643(nuclear pore)//GO:0005737(cytoplasm)	GO:0017056(structural constituent of nuclear pore)	GO:0044267(cellular protein metabolic process)//GO:0007283(spermatogenesis)//GO:0005975(carbohydrate metabolic process)//GO:0015758(glucose transport)//GO:0031081(nuclear pore distribution)//GO:0043687(post-translational protein modification)//GO:0019054(modulation by virus of host process)//GO:0008645(hexose transport)//GO:0008033(tRNA processing)//GO:0031047(gene silencing by RNA)//GO:0015031(p…
ALDH18A1	ENSG00000059573	protein_coding	-	chr10:97365695-97416463	21.313	6.90209	2.82368	1.62662	5e-05	0.000136014	up	5832	ADCL3|ARCL3A|GSAS|P5CS|PYCS|SPG9A|SPG9B	MIM:138250|HGNC:HGNC:9722|Ensembl:ENSG00000059573|HPRD:00696|Vega:OTTHUMG00000018815	10	10q24.3	aldehyde dehydrogenase 18 family member A1	hsa00330(Arginine and proline metabolism)//	GO:0005743(mitochondrial inner membrane)//GO:0005739(mitochondrion)//GO:0005737(cytoplasm)	GO:0004349(glutamate 5-kinase activity)//GO:0005524(ATP binding)//GO:0005515(protein binding)//GO:0044822(poly(A) RNA binding)//GO:0004350(glutamate-5-semialdehyde dehydrogenase activity)	GO:0055114(oxidation-reduction process)//GO:0008652(cellular amino acid biosynthetic process)//GO:0006561(proline biosynthetic process)//GO:0044281(small molecule metabolic process)//GO:0016310(phosphorylation)//GO:0019240(citrulline biosynthetic process)//GO:0006592(ornithine biosynthetic process)//GO:0034641(cellular nitrogen compound metabolic process)//GO:0006536(glutamate metabolic process)/…
PIGV	ENSG00000060642	protein_coding	+	chr1:27113962-27124889	4.08388	1.38823	2.12872	1.55669	5e-05	0.000136014	up	55650	GPI-MT-II|HPMRS1|PIG-V	MIM:610274|HGNC:HGNC:26031|Ensembl:ENSG00000060642|HPRD:07912|Vega:OTTHUMG00000004005	1	1p36.11	phosphatidylinositol glycan anchor biosynthesis class V	hsa00563(Glycosylphosphatidylinositol(GPI)-anchor biosynthesis)//	GO:0016021(integral component of membrane)//GO:0031501(mannosyltransferase complex)//GO:0005789(endoplasmic reticulum membrane)	GO:0004584(dolichyl-phosphate-mannose-glycolipid alpha-mannosyltransferase activity)//GO:0000030(mannosyltransferase activity)	GO:0044267(cellular protein metabolic process)//GO:0016254(preassembly of GPI anchor in ER membrane)//GO:0006506(GPI anchor biosynthetic process)//GO:0097502(mannosylation)//GO:0006501(C-terminal protein lipidation)//GO:0043687(post-translational protein modification)
COL11A1	ENSG00000060718	protein_coding	-	chr1:103342022-103574052	61.9037	6.43469	8.46084	3.26608	5e-05	0.000136014	up	1301	CO11A1|COLL6|STL2	MIM:120280|HGNC:HGNC:2186|Ensembl:ENSG00000060718|HPRD:00375|Vega:OTTHUMG00000010872	1	1p21	collagen type XI alpha 1	hsa04974(Protein digestion and absorption)	GO:0005592(collagen type XI trimer)//GO:0005576(extracellular region)//GO:0005788(endoplasmic reticulum lumen)	GO:0005201(extracellular matrix structural constituent)//GO:0050840(extracellular matrix binding)//GO:0046872(metal ion binding)//GO:0030674(protein binding, bridging)	GO:0042472(inner ear morphogenesis)//GO:0035987(endodermal cell differentiation)//GO:0022617(extracellular matrix disassembly)//GO:0030198(extracellular matrix organization)//GO:0006029(proteoglycan metabolic process)//GO:0001502(cartilage condensation)//GO:0050910(detection of mechanical stimulus involved in sensory perception of sound)//GO:0001503(ossification)//GO:0055010(ventricular cardiac m…
QSER1	ENSG00000060749	protein_coding	+	chr11:32914723-33014862	21.7614	8.14293	2.48951	1.41815	5e-05	0.000136014	up	79832	-	HGNC:HGNC:26154|Ensembl:ENSG00000060749|HPRD:08645|Vega:OTTHUMG00000166220	11	11p13	glutamine and serine rich 1
BCAT1	ENSG00000060982	protein_coding	-	chr12:24964294-25113092	81.7974	27.347	2.92085	1.58067	5e-05	0.000136014	up	586	BCATC|BCT1|ECA39|MECA39|PNAS121|PP18	MIM:113520|HGNC:HGNC:976|Ensembl:ENSG00000060982|HPRD:00216|Vega:OTTHUMG00000169053	12	12p12.1	branched chain amino-acid transaminase 1, cytosolic	hsa00270(Cysteine and methionine metabolism)//hsa00280(Valine, leucine and isoleucine degradation)//hsa00290(Valine, leucine and isoleucine biosynthesis)//hsa00770(Pantothenate and CoA biosynthesis)//	GO:0005739(mitochondrion)//GO:0005829(cytosol)	GO:0052654(L-leucine transaminase activity)//GO:0042802(identical protein binding)//GO:0052655(L-valine transaminase activity)//GO:0004084(branched-chain-amino-acid transaminase activity)//GO:0052656(L-isoleucine transaminase activity)//GO:0003824(catalytic activity)	GO:0008152(metabolic process)//GO:0044281(small molecule metabolic process)//GO:0009082(branched-chain amino acid biosynthetic process)//GO:0009083(branched-chain amino acid catabolic process)//GO:0008283(cell proliferation)//GO:0000082(G1/S transition of mitotic cell cycle)//GO:0034641(cellular nitrogen compound metabolic process)
SPAG4	ENSG00000061656	protein_coding	+	chr20:34203813-34208971	2.62388	0.977286	1.83275	1.42485	0.00385	0.00761571	up	6676	CT127|SUN4	MIM:603038|HGNC:HGNC:11214|Ensembl:ENSG00000061656|HPRD:04330|Vega:OTTHUMG00000032352	20	20q11.21	sperm associated antigen 4		GO:0016021(integral component of membrane)//GO:0031514(motile cilium)//GO:0005737(cytoplasm)//GO:0005635(nuclear envelope)//GO:0005856(cytoskeleton)	GO:0043495(protein anchor)//GO:0005198(structural molecule activity)//GO:0005515(protein binding)	GO:0006998(nuclear envelope organization)//GO:0007283(spermatogenesis)//GO:0090286(cytoskeletal anchoring at nuclear membrane)
HAGH	ENSG00000063854	protein_coding	-	chr16:1845620-1934295	18.7095	9.29386	1.91469	1.00942	5e-05	0.000136014	up	3029	GLO2|GLX2|GLXII|HAGH1	MIM:138760|HGNC:HGNC:4805|HPRD:00731	16	16p13.3	hydroxyacylglutathione hydrolase	hsa00620(Pyruvate metabolism)	GO:0070062(extracellular exosome)//GO:0005759(mitochondrial matrix)//GO:0005737(cytoplasm)//GO:0005829(cytosol)	GO:0046872(metal ion binding)//GO:0005515(protein binding)//GO:0004416(hydroxyacylglutathione hydrolase activity)	GO:0019243(methylglyoxal catabolic process to D-lactate via S-lactoyl-glutathione)//GO:0006750(glutathione biosynthetic process)//GO:0044281(small molecule metabolic process)//GO:0005975(carbohydrate metabolic process)//GO:0044237(cellular metabolic process)//GO:0006090(pyruvate metabolic process)
ASUN	ENSG00000064102	protein_coding	-	chr12:27058113-27091259	16.3084	2.05144	5.67221	2.9909	5e-05	0.000136014	up	55726	C12orf11|GCT1|Mat89Bb|NET48|SPATA30	MIM:615079|HGNC:HGNC:20174|Ensembl:ENSG00000064102|HPRD:07689|Vega:OTTHUMG00000169193	12	12p11.23	asunder spermatogenesis regulator		GO:0005634(nucleus)//GO:0005737(cytoplasm)	GO:0005515(protein binding)	GO:0007067(mitotic nuclear division)//GO:0007052(mitotic spindle organization)//GO:0030317(sperm motility)//GO:0051642(centrosome localization)//GO:0080154(regulation of fertilization)//GO:0007346(regulation of mitotic cell cycle)//GO:0051301(cell division)//GO:0090435(protein localization to nuclear envelope)
DLX3	ENSG00000064195	protein_coding	-	chr17:48067368-48072588	2.45221	0.695306	2.03633	1.81837	5e-05	0.000136014	up	1747	AI4|TDO	MIM:600525|HGNC:HGNC:2916|Ensembl:ENSG00000064195|HPRD:02752|Vega:OTTHUMG00000161892	17	17q21	distal-less homeobox 3		GO:0005634(nucleus)	GO:0001077(transcriptional activator activity, RNA polymerase II core promoter proximal region sequence-specific binding)//GO:0043565(sequence-specific DNA binding)//GO:0003682(chromatin binding)//GO:0003700(transcription factor activity, sequence-specific DNA binding)	GO:0071895(odontoblast differentiation)//GO:0042475(odontogenesis of dentin-containing tooth)//GO:0001568(blood vessel development)//GO:0006366(transcription from RNA polymerase II promoter)//GO:0045944(positive regulation of transcription from RNA polymerase II promoter)//GO:0001890(placenta development)//GO:0006355(regulation of transcription, DNA-templated)
ST3GAL6	ENSG00000064225	protein_coding	+	chr3:98433173-98620533	5.0173	1.62387	2.29329	1.62748	5e-05	0.000136014	up	10402	SIAT10|ST3GALVI	MIM:607156|HGNC:HGNC:18080|Ensembl:ENSG00000064225|HPRD:06195	3	3q12.1	ST3 beta-galactoside alpha-2,3-sialyltransferase 6	hsa00601(Glycosphingolipid biosynthesis - lacto and neolacto series)//	GO:0016021(integral component of membrane)//GO:0030173(integral component of Golgi membrane)//GO:0005794(Golgi apparatus)//GO:0000139(Golgi membrane)//GO:0070062(extracellular exosome)	GO:0052798(beta-galactoside alpha-2,3-sialyltransferase activity)//GO:0003836(beta-galactoside (CMP) alpha-2,3-sialyltransferase activity)//GO:0008373(sialyltransferase activity)	GO:0044267(cellular protein metabolic process)//GO:0044281(small molecule metabolic process)//GO:0006488(dolichol-linked oligosaccharide biosynthetic process)//GO:0006664(glycolipid metabolic process)//GO:0009311(oligosaccharide metabolic process)//GO:0018279(protein N-linked glycosylation via asparagine)//GO:0018146(keratan sulfate biosynthetic process)//GO:0005975(carbohydrate metabolic process…
CDON	ENSG00000064309	protein_coding	-	chr11:125820010-125933230	138.364	47.2744	2.88691	1.54933	5e-05	0.000136014	up	50937	CDO|CDON1|HPE11|ORCAM	MIM:608707|HGNC:HGNC:17104|Ensembl:ENSG00000064309|HPRD:16372|Vega:OTTHUMG00000165862	11	11q24.2	cell adhesion associated, oncogene regulated		GO:0031012(extracellular matrix)//GO:0016021(integral component of membrane)//GO:0005886(plasma membrane)//GO:0009986(cell surface)	GO:0005515(protein binding)	GO:0043497(regulation of protein heterodimerization activity)//GO:0045666(positive regulation of neuron differentiation)//GO:2000179(positive regulation of neural precursor cell proliferation)//GO:0045944(positive regulation of transcription from RNA polymerase II promoter)//GO:0021987(cerebral cortex development)//GO:0002088(lens development in camera-type eye)//GO:0001708(cell fate specificatio…
CHI3L2	ENSG00000064886	protein_coding	+	chr1:111729795-111786062	23.6559	0.722743	14.312	5.03257	5e-05	0.000136014	up	1117	CHIL2|YKL-39|YKL39	MIM:601526|HGNC:HGNC:1933|Ensembl:ENSG00000064886|HPRD:03315|Vega:OTTHUMG00000012174	1	1p13.3	chitinase 3 like 2		GO:0005615(extracellular space)	GO:0008061(chitin binding)//GO:0004568(chitinase activity)//GO:0030246(carbohydrate binding)//GO:0004553(hydrolase activity, hydrolyzing O-glycosyl compounds)	GO:0006032(chitin catabolic process)//GO:0005975(carbohydrate metabolic process)
PMS1	ENSG00000064933	protein_coding	+	chr2:190649106-190742355	32.3594	11.5193	2.66464	1.49013	5e-05	0.000136014	up	5378	HNPCC3|MLH2|PMSL1|hPMS1	MIM:600258|HGNC:HGNC:9121|Ensembl:ENSG00000064933|HPRD:02597|Vega:OTTHUMG00000132664	2	2q31.1	PMS1 homolog 1, mismatch repair system component		GO:0005634(nucleus)//GO:0000795(synaptonemal complex)//GO:0032389(MutLalpha complex)//GO:0005712(chiasma)	GO:0005524(ATP binding)//GO:0003697(single-stranded DNA binding)//GO:0030983(mismatched DNA binding)//GO:0003677(DNA binding)//GO:0016887(ATPase activity)	GO:0006298(mismatch repair)
OAT	ENSG00000065154	protein_coding	-	chr10:126085871-126107545	67.563	20.2641	3.22435	1.73731	5e-05	0.000136014	up	4942	GACR|HOGA|OATASE|OKT	MIM:613349|HGNC:HGNC:8091|Ensembl:ENSG00000065154|HPRD:02021|Vega:OTTHUMG00000019213	10	10q26	ornithine aminotransferase	hsa00330(Arginine and proline metabolism)//	GO:0005739(mitochondrion)//GO:0005759(mitochondrial matrix)	GO:0030170(pyridoxal phosphate binding)//GO:0042802(identical protein binding)//GO:0004587(ornithine-oxo-acid transaminase activity)	GO:0008652(cellular amino acid biosynthetic process)//GO:0044281(small molecule metabolic process)//GO:0019544(arginine catabolic process to glutamate)//GO:0010121(arginine catabolic process to proline via ornithine)//GO:0034214(protein hexamerization)//GO:0007601(visual perception)//GO:0034641(cellular nitrogen compound metabolic process)//GO:0055129(L-proline biosynthetic process)
WDR18	ENSG00000065268	protein_coding	+	chr19:983173-994569	8.19176	1.9427	3.12358	2.07611	5e-05	0.000136014	up	57418	Ipi3|R32184_1	HGNC:HGNC:17956|Ensembl:ENSG00000065268|HPRD:18296|Vega:OTTHUMG00000181903	19	19p13.3	WD repeat domain 18		GO:0005654(nucleoplasm)//GO:0005737(cytoplasm)	GO:0005515(protein binding)	GO:0007275(multicellular organism development)
TBC1D22B	ENSG00000065491	protein_coding	+	chr6:37179955-37300746	3.9285	1.87743	1.71281	1.06522	5e-05	0.000136014	up	55633	C6orf197	HGNC:HGNC:21602|Ensembl:ENSG00000065491|HPRD:15475|Vega:OTTHUMG00000014619	6	6p21.2	TBC1 domain family member 22B			GO:0005096(GTPase activator activity)//GO:0005515(protein binding)	GO:1902017(regulation of cilium assembly)//GO:0043547(positive regulation of GTPase activity)
NDUFB4	ENSG00000065518	protein_coding	+	chr3:120315155-120321347	17.3032	5.37427	2.87142	1.6869	5e-05	0.000136014	up	4710	B15|CI-B15	MIM:603840|HGNC:HGNC:7699|Ensembl:ENSG00000065518|HPRD:11955|Vega:OTTHUMG00000159442	3	3q13.33	NADH:ubiquinone oxidoreductase subunit B4	hsa00190(Oxidative phosphorylation)//	GO:0005743(mitochondrial inner membrane)//GO:0070062(extracellular exosome)//GO:0005747(mitochondrial respiratory chain complex I)//GO:0031965(nuclear membrane)//GO:0016021(integral component of membrane)//GO:0005739(mitochondrion)//GO:0005654(nucleoplasm)	GO:0008137(NADH dehydrogenase (ubiquinone) activity)	GO:0055114(oxidation-reduction process)//GO:0032981(mitochondrial respiratory chain complex I assembly)//GO:0044281(small molecule metabolic process)//GO:0006979(response to oxidative stress)//GO:0022904(respiratory electron transport chain)//GO:0006120(mitochondrial electron transport, NADH to ubiquinone)//GO:0044237(cellular metabolic process)
CYB5R4	ENSG00000065615	protein_coding	+	chr6:84569361-84677143	5.15747	1.54925	2.4154	1.73509	5e-05	0.000136014	up	51167	NCB5OR|cb5/cb5R|dJ676J13.1	MIM:608343|HGNC:HGNC:20147|HPRD:12218	6	6pter-q22.33	cytochrome b5 reductase 4	hsa00520(Amino sugar and nucleotide sugar metabolism)	GO:0005783(endoplasmic reticulum)//GO:0048471(perinuclear region of cytoplasm)	GO:0050660(flavin adenine dinucleotide binding)//GO:0046872(metal ion binding)//GO:0016653(oxidoreductase activity, acting on NAD(P)H, heme protein as acceptor)//GO:0020037(heme binding)//GO:0004128(cytochrome-b5 reductase activity, acting on NAD(P)H)//GO:0016174(NAD(P)H oxidase activity)//GO:0003958(NADPH-hemoprotein reductase activity)	GO:0006739(NADP metabolic process)//GO:0055114(oxidation-reduction process)//GO:0030073(insulin secretion)//GO:0006801(superoxide metabolic process)//GO:0003032(detection of oxygen)//GO:0042593(glucose homeostasis)//GO:0006091(generation of precursor metabolites and energy)//GO:0048468(cell development)//GO:0046677(response to antibiotic)
SEC61A2	ENSG00000065665	protein_coding	+	chr10:12171635-12292588	7.47625	2.16308	2.67975	1.78923	5e-05	0.000136014	up	55176	-	HGNC:HGNC:17702|Ensembl:ENSG00000065665|HPRD:15317|Vega:OTTHUMG00000017679	10	10p14	Sec61 translocon alpha 2 subunit	hsa03060(Protein export)//hsa04141(Protein processing in endoplasmic reticulum)//hsa04145(Phagosome)//hsa05110(Vibrio cholerae infection)	GO:0016021(integral component of membrane)//GO:0005789(endoplasmic reticulum membrane)//GO:0005829(cytosol)	GO:0003674(molecular_function)//GO:0043022(ribosome binding)	GO:0044267(cellular protein metabolic process)//GO:0042590(antigen processing and presentation of exogenous peptide antigen via MHC class I)//GO:0002479(antigen processing and presentation of exogenous peptide antigen via MHC class I, TAP-dependent)//GO:0030968(endoplasmic reticulum unfolded protein response)//GO:0002474(antigen processing and presentation of peptide antigen via MHC class I)//GO:…
ASB1	ENSG00000065802	protein_coding	+	chr2:239335382-239360891	31.7894	9.66937	3.07323	1.71705	5e-05	0.000136014	up	51665	ASB-1	MIM:605758|HGNC:HGNC:16011|Ensembl:ENSG00000065802|HPRD:05767|Vega:OTTHUMG00000152866	2	2q37	ankyrin repeat and SOCS box containing 1		GO:0005622(intracellular)	GO:0003674(molecular_function)	GO:0030539(male genitalia development)//GO:0035556(intracellular signal transduction)//GO:0042036(negative regulation of cytokine biosynthetic process)//GO:0016567(protein ubiquitination)
ME1	ENSG00000065833	protein_coding	-	chr6:83920107-84140797	5.79821	2.84458	1.76826	1.02739	5e-05	0.000136014	up	4199	HUMNDME|MES	MIM:154250|HGNC:HGNC:6983|Ensembl:ENSG00000065833|HPRD:01102|Vega:OTTHUMG00000015111	6	6q12	malic enzyme 1, NADP(+)-dependent, cytosolic	hsa00620(Pyruvate metabolism)//	GO:0005739(mitochondrion)//GO:0005829(cytosol)	GO:0004471(malate dehydrogenase (decarboxylating) (NAD+) activity)//GO:0008948(oxaloacetate decarboxylase activity)//GO:0051287(NAD binding)//GO:0050661(NADP binding)//GO:0009055(electron carrier activity)//GO:0004470(malic enzyme activity)//GO:0004473(malate dehydrogenase (decarboxylating) (NADP+) activity)//GO:0043531(ADP binding)//GO:0030145(manganese ion binding)	GO:0044255(cellular lipid metabolic process)//GO:0055114(oxidation-reduction process)//GO:0009743(response to carbohydrate)//GO:0044281(small molecule metabolic process)//GO:0006108(malate metabolic process)//GO:0051262(protein tetramerization)//GO:0005975(carbohydrate metabolic process)//GO:0006741(NADP biosynthetic process)//GO:1902031(regulation of NADP metabolic process)//GO:0009725(response …
ZMYND12	ENSG00000066185	protein_coding	-	chr1:42895999-43120335	1.37889	0.101619	2.15945	3.76226	0.0026	0.00532058	up	84217	-	HGNC:HGNC:21192|Ensembl:ENSG00000066185|HPRD:15740|Vega:OTTHUMG00000007333	1	1p34.2	zinc finger MYND-type containing 12		GO:0005622(intracellular)	GO:0046872(metal ion binding)
NGEF	ENSG00000066248	protein_coding	-	chr2:233562008-233880595	49.5834	13.7595	3.42718	1.84943	5e-05	0.000136014	up	25791	ARHGEF27|EPHEXIN	MIM:605991|HGNC:HGNC:7807|Ensembl:ENSG00000066248|HPRD:10442|Vega:OTTHUMG00000133272	2	2q37	neuronal guanine nucleotide exchange factor	hsa04360(Axon guidance)	GO:0016020(membrane)//GO:0030426(growth cone)//GO:0005829(cytosol)	GO:0005089(Rho guanyl-nucleotide exchange factor activity)//GO:0005085(guanyl-nucleotide exchange factor activity)	GO:0061002(negative regulation of dendritic spine morphogenesis)//GO:0007411(axon guidance)//GO:0048013(ephrin receptor signaling pathway)//GO:0043065(positive regulation of apoptotic process)//GO:0007264(small GTPase mediated signal transduction)//GO:0043547(positive regulation of GTPase activity)//GO:0048011(neurotrophin TRK receptor signaling pathway)//GO:0035023(regulation of Rho protein sign…
CD84	ENSG00000066294	protein_coding	-	chr1:160506862-160549306	2.85837	1.14253	1.80085	1.32296	0.00015	0.000384245	up	8832	LY9B|SLAMF5|hCD84|mCD84	MIM:604513|HGNC:HGNC:1704|Ensembl:ENSG00000066294|HPRD:05151|Vega:OTTHUMG00000022788	1	1q24	CD84 molecule		GO:0005886(plasma membrane)//GO:0005887(integral component of plasma membrane)//GO:0070062(extracellular exosome)	GO:0005515(protein binding)	GO:0006952(defense response)//GO:0032685(negative regulation of granulocyte macrophage colony-stimulating factor production)//GO:0045087(innate immune response)//GO:0007596(blood coagulation)//GO:0007156(homophilic cell adhesion via plasma membrane adhesion molecules)//GO:0032701(negative regulation of interleukin-18 production)//GO:2001256(regulation of store-operated calcium entry)//GO:0033004(…
ZNRD1	ENSG00000066379	protein_coding	+	chr6:29968787-30032686	22.4231	9.23729	2.28802	1.27945	5e-05	0.000136014	up	30834	HTEX-6|HTEX6|Rpa12|TCTEX6|TEX6|ZR14|hZR14|tctex-6	MIM:607525|HGNC:HGNC:13182|Ensembl:ENSG00000066379|HPRD:09601|Vega:OTTHUMG00000031149	6	6p21.3	zinc ribbon domain containing 1	hsa00230(Purine metabolism)//hsa00240(Pyrimidine metabolism)//	GO:0005654(nucleoplasm)//GO:0005736(DNA-directed RNA polymerase I complex)	GO:0001054(RNA polymerase I activity)//GO:0003676(nucleic acid binding)//GO:0008270(zinc ion binding)	GO:0045815(positive regulation of gene expression, epigenetic)//GO:0006362(transcription elongation from RNA polymerase I promoter)//GO:0006360(transcription from RNA polymerase I promoter)//GO:0040029(regulation of gene expression, epigenetic)//GO:0010467(gene expression)//GO:0045814(negative regulation of gene expression, epigenetic)//GO:0006363(termination of RNA polymerase I transcription)//G…
ATXN3	ENSG00000066427	protein_coding	-	chr14:92524895-92572965	38.2072	18.5138	2.0092	1.04524	5e-05	0.000136014	up	4287	AT3|ATX3|JOS|MJD|MJD1|SCA3	MIM:607047|HGNC:HGNC:7106|Ensembl:ENSG00000066427|HPRD:06131	14	14q21	ataxin 3	hsa04141(Protein processing in endoplasmic reticulum)	GO:0042405(nuclear inclusion body)//GO:0005789(endoplasmic reticulum membrane)//GO:0005829(cytosol)//GO:0016363(nuclear matrix)//GO:0005759(mitochondrial matrix)//GO:0005654(nucleoplasm)//GO:0031966(mitochondrial membrane)//GO:0005634(nucleus)//GO:0005737(cytoplasm)	GO:1990380(Lys48-specific deubiquitinase activity)//GO:0031625(ubiquitin protein ligase binding)//GO:0061578(Lys63-specific deubiquitinase activity)//GO:0042802(identical protein binding)//GO:0008242(omega peptidase activity)//GO:0051117(ATPase binding)//GO:0005515(protein binding)//GO:0004843(thiol-dependent ubiquitin-specific protease activity)//GO:0008234(cysteine-type peptidase activity)	GO:1904379(protein localization to cytosolic proteasome complex involved in ERAD pathway)//GO:0071108(protein K48-linked deubiquitination)//GO:0010810(regulation of cell-substrate adhesion)//GO:0035520(monoubiquitinated protein deubiquitination)//GO:0070536(protein K63-linked deubiquitination)//GO:0007268(synaptic transmission)//GO:0071218(cellular response to misfolded protein)//GO:0006351(trans…
EML1	ENSG00000066629	protein_coding	+	chr14:100204029-100408397	44.8538	22.1562	1.9802	1.01752	5e-05	0.000136014	up	2009	ELP79|EMAP|EMAPL|HuEMAP	MIM:602033|HGNC:HGNC:3330|Ensembl:ENSG00000066629|HPRD:03613|Vega:OTTHUMG00000171529	14	14q32	echinoderm microtubule associated protein like 1		GO:0005874(microtubule)//GO:0048471(perinuclear region of cytoplasm)//GO:0097431(mitotic spindle pole)//GO:0005829(cytosol)//GO:0005875(microtubule associated complex)//GO:1990023(mitotic spindle midzone)	GO:0008017(microtubule binding)//GO:0005515(protein binding)//GO:0015631(tubulin binding)//GO:0005509(calcium ion binding)	GO:0007420(brain development)//GO:0007405(neuroblast proliferation)//GO:0007052(mitotic spindle organization)//GO:0002244(hematopoietic progenitor cell differentiation)//GO:0000226(microtubule cytoskeleton organization)
DDX3Y	ENSG00000067048	protein_coding	+	chrY:15016018-15032390	35.3125	0.040643	34.8943	9.76296	0.0473	0.0720918	up	8653	DBY	MIM:400010|HGNC:HGNC:2699|Ensembl:ENSG00000067048|HPRD:02452|Vega:OTTHUMG00000036324	Y	Yq11	DEAD-box helicase 3, Y-linked		GO:0016020(membrane)//GO:0005634(nucleus)//GO:0036464(cytoplasmic ribonucleoprotein granule)//GO:0005737(cytoplasm)	GO:0005524(ATP binding)//GO:0003723(RNA binding)//GO:0003676(nucleic acid binding)//GO:0003677(DNA binding)//GO:0004004(ATP-dependent RNA helicase activity)	GO:0010501(RNA secondary structure unwinding)//GO:0006413(translational initiation)//GO:0010468(regulation of gene expression)//GO:0007059(chromosome segregation)
CACNB1	ENSG00000067191	protein_coding	-	chr17:37329542-37353956	18.2085	7.08646	2.37539	1.36147	5e-05	0.000136014	up	782	CAB1|CACNLB1|CCHLB1	MIM:114207|HGNC:HGNC:1401|Ensembl:ENSG00000067191|HPRD:11743|Vega:OTTHUMG00000133217	17	17q12	calcium voltage-gated channel auxiliary subunit beta 1	hsa04010(MAPK signaling pathway)//hsa04260(Cardiac muscle contraction)//hsa04261(Adrenergic signaling in cardiomyocytes)//hsa04921(Oxytocin signaling pathway)//hsa05410(Hypertrophic cardiomyopathy (HCM))//hsa05412(Arrhythmogenic right ventricular cardiomyopathy (ARVC))//hsa05414(Dilated cardiomyopathy)	GO:0005891(voltage-gated calcium channel complex)//GO:0016529(sarcoplasmic reticulum)//GO:0005886(plasma membrane)//GO:0030315(T-tubule)	GO:0008331(high voltage-gated calcium channel activity)//GO:0019901(protein kinase binding)//GO:0051219(phosphoprotein binding)//GO:0005245(voltage-gated calcium channel activity)//GO:0019904(protein domain specific binding)	GO:0007411(axon guidance)//GO:0061337(cardiac conduction)//GO:0070588(calcium ion transmembrane transport)//GO:0007268(synaptic transmission)//GO:1901385(regulation of voltage-gated calcium channel activity)//GO:0007528(neuromuscular junction development)//GO:0006810(transport)//GO:0006612(protein targeting to membrane)
RRP15	ENSG00000067533	protein_coding	+	chr1:218458628-218511325	6.5668	2.30671	2.28832	1.50936	5e-05	0.000136014	up	51018	CGI-115|KIAA0507	MIM:611193|HGNC:HGNC:24255|Ensembl:ENSG00000067533|HPRD:10822|Vega:OTTHUMG00000039494	1	1q41	ribosomal RNA processing 15 homolog		GO:0005730(nucleolus)//GO:0005634(nucleus)//GO:0005739(mitochondrion)
ZFY	ENSG00000067646	protein_coding	+	chrY:2803111-2870667	12.4718	0	13.4718	inf	5e-05	0.000136014	up	7544	ZNF911	MIM:490000|HGNC:HGNC:12870|Ensembl:ENSG00000067646|HPRD:02466|Vega:OTTHUMG00000036159	Y	Yp11.3	zinc finger protein, Y-linked		GO:0005634(nucleus)	GO:0046872(metal ion binding)//GO:0000977(RNA polymerase II regulatory region sequence-specific DNA binding)//GO:0003700(transcription factor activity, sequence-specific DNA binding)	GO:0007275(multicellular organism development)//GO:0006351(transcription, DNA-templated)//GO:0006355(regulation of transcription, DNA-templated)
FGFR3	ENSG00000068078	protein_coding	+	chr4:1795033-1810599	7.94747	2.34735	2.673	1.75946	0.00705	0.0131557	up	2261	ACH|CD333|CEK2|HSFGFR3EX|JTK4	MIM:134934|HGNC:HGNC:3690|Ensembl:ENSG00000068078|HPRD:00624|Vega:OTTHUMG00000121148	4	4p16.3	fibroblast growth factor receptor 3	hsa04010(MAPK signaling pathway)//hsa04014(Ras signaling pathway)//hsa04015(Rap1 signaling pathway)//hsa04144(Endocytosis)//hsa04151(PI3K-Akt signaling pathway)//hsa04550(Signaling pathways regulating pluripotency of stem cells)//hsa04810(Regulation of actin cytoskeleton)//hsa05200(Pathways in cancer)//hsa05206(MicroRNAs in cancer)//hsa05219(Bladder cancer)//hsa05230(Central carbon metabolism in …	GO:0016021(integral component of membrane)//GO:0005887(integral component of plasma membrane)//GO:0005576(extracellular region)//GO:0005886(plasma membrane)//GO:0009986(cell surface)//GO:0030133(transport vesicle)//GO:0048471(perinuclear region of cytoplasm)//GO:0005794(Golgi apparatus)//GO:0005764(lysosome)//GO:0005783(endoplasmic reticulum)//GO:0005634(nucleus)//GO:0005925(focal adhesion)//GO:0…	GO:0005524(ATP binding)//GO:0004713(protein tyrosine kinase activity)//GO:0005007(fibroblast growth factor-activated receptor activity)//GO:0005515(protein binding)//GO:0017134(fibroblast growth factor binding)	GO:0072148(epithelial cell fate commitment)//GO:0010518(positive regulation of phospholipase activity)//GO:0048011(neurotrophin TRK receptor signaling pathway)//GO:0008285(negative regulation of cell proliferation)//GO:0000122(negative regulation of transcription from RNA polymerase II promoter)//GO:0090102(cochlea development)//GO:0060113(inner ear receptor cell differentiation)//GO:0035988(chon…
FTSJ1	ENSG00000068438	protein_coding	+	chrX:48334540-48344752	12.8318	5.46153	2.14064	1.23235	5e-05	0.000136014	up	24140	CDLIV|JM23|MRX44|MRX9|SPB1|TRMT7	MIM:300499|HGNC:HGNC:13254|Ensembl:ENSG00000068438|HPRD:06568|Vega:OTTHUMG00000024118	X	Xp11.23	FtsJ RNA methyltransferase homolog 1 (E. coli)		GO:0005737(cytoplasm)	GO:0008175(tRNA methyltransferase activity)//GO:0008168(methyltransferase activity)	GO:0030488(tRNA methylation)//GO:0002128(tRNA nucleoside ribose methylation)//GO:0001510(RNA methylation)//GO:0002181(cytoplasmic translation)
REEP1	ENSG00000068615	protein_coding	-	chr2:86441115-86565206	8.34224	3.83327	1.9329	1.12186	5e-05	0.000136014	up	65055	C2orf23|HMN5B|SPG31|Yip2a	MIM:609139|HGNC:HGNC:25786|Ensembl:ENSG00000068615|HPRD:07810|Vega:OTTHUMG00000130205	2	2p11.2	receptor accessory protein 1		GO:0016021(integral component of membrane)//GO:0016020(membrane)//GO:0005789(endoplasmic reticulum membrane)//GO:0005783(endoplasmic reticulum)//GO:0031966(mitochondrial membrane)//GO:0005737(cytoplasm)	GO:0008017(microtubule binding)//GO:0005515(protein binding)//GO:0031849(olfactory receptor binding)	GO:0051205(protein insertion into membrane)//GO:0032386(regulation of intracellular transport)//GO:0071786(endoplasmic reticulum tubular network organization)
SDK2	ENSG00000069188	protein_coding	-	chr17:71330522-71640228	5.35089	2.18317	1.99515	1.29336	5e-05	0.000136014	up	54549	-	MIM:607217|HGNC:HGNC:19308|Ensembl:ENSG00000069188|HPRD:06239|Vega:OTTHUMG00000152726	17	17q25.1	sidekick cell adhesion molecule 2		GO:0045202(synapse)//GO:0016021(integral component of membrane)//GO:0030054(cell junction)//GO:0005886(plasma membrane)		GO:0010842(retina layer formation)//GO:0007156(homophilic cell adhesion via plasma membrane adhesion molecules)//GO:0007416(synapse assembly)//GO:0060219(camera-type eye photoreceptor cell differentiation)
NEDD4	ENSG00000069869	protein_coding	-	chr15:56119119-56285944	22.3178	7.16783	2.85483	1.63859	5e-05	0.000136014	up	4734	NEDD4-1|RPF1	MIM:602278|HGNC:HGNC:7727|Ensembl:ENSG00000069869|HPRD:03786|Vega:OTTHUMG00000132015	15	15q	neural precursor cell expressed, developmentally down-regulated 4, E3 ubiquitin protein ligase	hsa04120(Ubiquitin mediated proteolysis)//hsa04144(Endocytosis)//hsa05169(Epstein-Barr virus infection)	GO:0005886(plasma membrane)//GO:0048471(perinuclear region of cytoplasm)//GO:0005938(cell cortex)//GO:0005902(microvillus)//GO:0005794(Golgi apparatus)//GO:0005829(cytosol)//GO:0070062(extracellular exosome)//GO:0045121(membrane raft)//GO:0016327(apicolateral plasma membrane)//GO:0000785(chromatin)//GO:0005737(cytoplasm)//GO:0000151(ubiquitin ligase complex)	GO:0031698(beta-2 adrenergic receptor binding)//GO:0019904(protein domain specific binding)//GO:0070063(RNA polymerase binding)//GO:0043130(ubiquitin binding)//GO:0004842(ubiquitin-protein transferase activity)//GO:0050815(phosphoserine binding)//GO:0061630(ubiquitin protein ligase activity)//GO:0016874(ligase activity)//GO:0050816(phosphothreonine binding)//GO:0070064(proline-rich region binding…	GO:0050807(regulation of synapse organization)//GO:0070534(protein K63-linked ubiquitination)//GO:0030948(negative regulation of vascular endothelial growth factor receptor signaling pathway)//GO:0034765(regulation of ion transmembrane transport)//GO:0043162(ubiquitin-dependent protein catabolic process via the multivesicular body sorting pathway)//GO:0042110(T cell activation)//GO:0046824(positi…
PIGB	ENSG00000069943	protein_coding	+	chr15:55495163-55800432	15.7343	6.8322	2.1366	1.20349	5e-05	0.000136014	up	9488	GPI-MT-III|PIG-B	MIM:604122|HGNC:HGNC:8959|Ensembl:ENSG00000069943|HPRD:04988|Vega:OTTHUMG00000172654	15	15q21.3	phosphatidylinositol glycan anchor biosynthesis class B	hsa00563(Glycosylphosphatidylinositol(GPI)-anchor biosynthesis)//	GO:0016021(integral component of membrane)//GO:0005789(endoplasmic reticulum membrane)	GO:0016757(transferase activity, transferring glycosyl groups)//GO:0000030(mannosyltransferase activity)	GO:0044267(cellular protein metabolic process)//GO:0008152(metabolic process)//GO:0016254(preassembly of GPI anchor in ER membrane)//GO:0006506(GPI anchor biosynthetic process)//GO:0097502(mannosylation)//GO:0006501(C-terminal protein lipidation)//GO:0043687(post-translational protein modification)
CECR5	ENSG00000069998	protein_coding	-	chr22:17618400-17646335	14.7572	5.59459	2.38941	1.39931	5e-05	0.000136014	up	27440	-	HGNC:HGNC:1843|Ensembl:ENSG00000069998|HPRD:16703|Vega:OTTHUMG00000150071	22	-	cat eye syndrome chromosome region, candidate 5		GO:0005739(mitochondrion)		GO:0046474(glycerophospholipid biosynthetic process)
FSTL3	ENSG00000070404	protein_coding	+	chr19:676391-683385	9.82029	3.8389	2.23611	1.35507	5e-05	0.000136014	up	10272	FLRG|FSRP	MIM:605343|HGNC:HGNC:3973|Ensembl:ENSG00000070404|HPRD:05632|Vega:OTTHUMG00000180593	19	19p13	follistatin like 3		GO:0005576(extracellular region)//GO:0044306(neuron projection terminus)//GO:0005794(Golgi apparatus)//GO:0005654(nucleoplasm)//GO:0005634(nucleus)//GO:0005615(extracellular space)//GO:0030141(secretory granule)	GO:0005515(protein binding)//GO:0001968(fibronectin binding)//GO:0048185(activin binding)	GO:0030514(negative regulation of BMP signaling pathway)//GO:0008584(male gonad development)//GO:0032926(negative regulation of activin receptor signaling pathway)//GO:0022409(positive regulation of cell-cell adhesion)//GO:0006351(transcription, DNA-templated)//GO:0002244(hematopoietic progenitor cell differentiation)//GO:0007283(spermatogenesis)//GO:0001503(ossification)//GO:0030325(adrenal glan…
ASNS	ENSG00000070669	protein_coding	-	chr7:97481429-97501854	19.8078	8.41885	2.20917	1.23437	5e-05	0.000136014	up	440	ASNSD|TS11	MIM:108370|HGNC:HGNC:753|Ensembl:ENSG00000070669|HPRD:00153|Vega:OTTHUMG00000022892	7	7q21.3	asparagine synthetase (glutamine-hydrolyzing)	hsa00250(Alanine, aspartate and glutamate metabolism)//	GO:0005829(cytosol)	GO:0005524(ATP binding)//GO:0048037(cofactor binding)//GO:0005515(protein binding)//GO:0004066(asparagine synthase (glutamine-hydrolyzing) activity)//GO:0042803(protein homodimerization activity)	GO:0008652(cellular amino acid biosynthetic process)//GO:0044267(cellular protein metabolic process)//GO:0043200(response to amino acid)//GO:0044281(small molecule metabolic process)//GO:0043066(negative regulation of apoptotic process)//GO:0036499(PERK-mediated unfolded protein response)//GO:0006541(glutamine metabolic process)//GO:0030968(endoplasmic reticulum unfolded protein response)//GO:000…
EIF2B3	ENSG00000070785	protein_coding	-	chr1:45316449-45452282	17.5967	6.37516	2.52153	1.46477	5e-05	0.000136014	up	8891	EIF-2B|EIF2Bgamma	MIM:606273|HGNC:HGNC:3259|Ensembl:ENSG00000070785|HPRD:09379|Vega:OTTHUMG00000008585	1	1p34.1	eukaryotic translation initiation factor 2B subunit gamma	hsa03013(RNA transport)	GO:0005851(eukaryotic translation initiation factor 2B complex)//GO:0005737(cytoplasm)//GO:0005829(cytosol)	GO:0005085(guanyl-nucleotide exchange factor activity)//GO:0008135(translation factor activity, RNA binding)//GO:0005515(protein binding)//GO:0003743(translation initiation factor activity)//GO:0016779(nucleotidyltransferase activity)	GO:0044267(cellular protein metabolic process)//GO:0009408(response to heat)//GO:0009749(response to glucose)//GO:0051716(cellular response to stimulus)//GO:0010467(gene expression)//GO:0043547(positive regulation of GTPase activity)//GO:0006412(translation)//GO:0006413(translational initiation)//GO:0014003(oligodendrocyte development)//GO:0032057(negative regulation of translational initiation i…
NCK2	ENSG00000071051	protein_coding	+	chr2:106361353-106510730	26.3582	12.0096	2.10292	1.13407	5e-05	0.000136014	up	8440	GRB4|NCKbeta	MIM:604930|HGNC:HGNC:7665|Ensembl:ENSG00000071051|HPRD:05378|Vega:OTTHUMG00000153116	2	2q12	NCK adaptor protein 2	hsa04012(ErbB signaling pathway)//hsa04360(Axon guidance)//hsa04660(T cell receptor signaling pathway)//hsa05130(Pathogenic Escherichia coli infection)	GO:0012506(vesicle membrane)//GO:0005802(trans-Golgi network)//GO:0005829(cytosol)//GO:0097481(neuronal postsynaptic density)//GO:0005783(endoplasmic reticulum)//GO:0005737(cytoplasm)	GO:0032403(protein complex binding)//GO:0008093(cytoskeletal adaptor activity)//GO:0005086(ARF guanyl-nucleotide exchange factor activity)//GO:0030159(receptor signaling complex scaffold activity)//GO:0097110(scaffold protein binding)//GO:0005515(protein binding)//GO:0005070(SH3/SH2 adaptor activity)	GO:1903912(negative regulation of endoplasmic reticulum stress-induced eIF2 alpha phosphorylation)//GO:0036493(positive regulation of translation in response to endoplasmic reticulum stress)//GO:0048013(ephrin receptor signaling pathway)//GO:0007015(actin filament organization)//GO:0016477(cell migration)//GO:0042110(T cell activation)//GO:0016192(vesicle-mediated transport)//GO:0008285(negative …
ATP6AP1	ENSG00000071553	protein_coding	+	chrX:153656977-153664862	20.3022	7.91191	2.39031	1.35954	5e-05	0.000136014	up	537	16A|ATP6IP1|ATP6S1|Ac45|CF2|VATPS1|XAP-3|XAP3	MIM:300197|HGNC:HGNC:868|Ensembl:ENSG00000071553|HPRD:02184|Vega:OTTHUMG00000033291	X	Xq28	ATPase H+ transporting accessory protein 1	hsa00190(Oxidative phosphorylation)//	GO:0016021(integral component of membrane)//GO:0070062(extracellular exosome)//GO:0010008(endosome membrane)//GO:0016469(proton-transporting two-sector ATPase complex)//GO:0005774(vacuolar membrane)//GO:0033180(proton-transporting V-type ATPase, V1 domain)	GO:0005524(ATP binding)//GO:0017137(Rab GTPase binding)//GO:0046961(proton-transporting ATPase activity, rotational mechanism)//GO:0046933(proton-transporting ATP synthase activity, rotational mechanism)//GO:0005215(transporter activity)	GO:0045780(positive regulation of bone resorption)//GO:0015992(proton transport)//GO:0045851(pH reduction)//GO:0008286(insulin receptor signaling pathway)//GO:0015991(ATP hydrolysis coupled proton transport)//GO:2001206(positive regulation of osteoclast development)//GO:0070374(positive regulation of ERK1 and ERK2 cascade)//GO:0033572(transferrin transport)//GO:0006879(cellular iron ion homeostas…
MARK2	ENSG00000072518	protein_coding	+	chr11:63606399-63678491	13.9302	6.69115	1.94122	1.05789	5e-05	0.000136014	up	2011	EMK-1|EMK1|PAR-1|Par-1b|Par1b	MIM:600526|HGNC:HGNC:3332|Ensembl:ENSG00000072518|HPRD:02753	11	11q13.1	microtubule affinity regulating kinase 2		GO:0005886(plasma membrane)//GO:0016328(lateral plasma membrane)//GO:0016020(membrane)//GO:0097427(microtubule bundle)//GO:0005884(actin filament)//GO:0005739(mitochondrion)//GO:0045180(basal cortex)//GO:0005634(nucleus)	GO:0030295(protein kinase activator activity)//GO:0004674(protein serine/threonine kinase activity)//GO:0004672(protein kinase activity)//GO:0000287(magnesium ion binding)//GO:0008289(lipid binding)//GO:0005524(ATP binding)//GO:0016301(kinase activity)//GO:0050321(tau-protein kinase activity)//GO:0044822(poly(A) RNA binding)//GO:0005515(protein binding)	GO:0010976(positive regulation of neuron projection development)//GO:0032147(activation of protein kinase activity)//GO:0035556(intracellular signal transduction)//GO:0016310(phosphorylation)//GO:0006468(protein phosphorylation)//GO:0050770(regulation of axonogenesis)//GO:0051646(mitochondrion localization)//GO:0045197(establishment or maintenance of epithelial cell apical/basal polarity)//GO:004…
TRHDE	ENSG00000072657	protein_coding	+	chr12:72332625-73059422	1.40832	0.655871	1.45441	1.10249	0.0163	0.0279584	up	29953	PAP-II|PGPEP2|TRH-DE	MIM:606950|HGNC:HGNC:30748|HPRD:09506	12	12q21.1	thyrotropin releasing hormone degrading enzyme		GO:0016020(membrane)//GO:0005887(integral component of plasma membrane)//GO:0005737(cytoplasm)//GO:0070062(extracellular exosome)	GO:0008237(metallopeptidase activity)//GO:0008270(zinc ion binding)//GO:0004177(aminopeptidase activity)//GO:0042277(peptide binding)//GO:0070006(metalloaminopeptidase activity)	GO:0006508(proteolysis)//GO:0008217(regulation of blood pressure)//GO:0007267(cell-cell signaling)//GO:0043171(peptide catabolic process)//GO:0007165(signal transduction)
P4HA2	ENSG00000072682	protein_coding	-	chr5:131520568-131731306	71.5661	19.8937	3.47311	1.84696	5e-05	0.000136014	up	8974	-	MIM:600608|HGNC:HGNC:8547|Ensembl:ENSG00000072682|HPRD:11862|Vega:OTTHUMG00000059647	5	5q31	prolyl 4-hydroxylase subunit alpha 2	hsa00330(Arginine and proline metabolism)//	GO:0016222(procollagen-proline 4-dioxygenase complex)//GO:0005788(endoplasmic reticulum lumen)//GO:0043231(intracellular membrane-bounded organelle)//GO:0005783(endoplasmic reticulum)//GO:0005634(nucleus)//GO:0005737(cytoplasm)	GO:0031418(L-ascorbic acid binding)//GO:0009055(electron carrier activity)//GO:0004656(procollagen-proline 4-dioxygenase activity)//GO:0005506(iron ion binding)//GO:0016702(oxidoreductase activity, acting on single donors with incorporation of molecular oxygen, incorporation of two atoms of oxygen)//GO:0005515(protein binding)	GO:0055114(oxidation-reduction process)//GO:0019511(peptidyl-proline hydroxylation)//GO:0018401(peptidyl-proline hydroxylation to 4-hydroxy-L-proline)
TMEM38A	ENSG00000072954	protein_coding	+	chr19:16771937-16800840	3.34262	0.806568	2.4038	2.05111	5e-05	0.000136014	up	79041	TRIC-A|TRICA	MIM:611235|HGNC:HGNC:28462|HPRD:15537	19	19p13.11	transmembrane protein 38A		GO:0031965(nuclear membrane)//GO:0033017(sarcoplasmic reticulum membrane)//GO:0016021(integral component of membrane)//GO:0070062(extracellular exosome)	GO:0005267(potassium channel activity)//GO:0005261(cation channel activity)	GO:0098655(cation transmembrane transport)//GO:0071805(potassium ion transmembrane transport)//GO:0015672(monovalent inorganic cation transport)
SMARCE1	ENSG00000073584	protein_coding	-	chr17:38781213-38821433	49.8899	16.3896	2.92646	1.60596	5e-05	0.000136014	up	6605	BAF57	MIM:603111|HGNC:HGNC:11109|HPRD:04382	17	17q21.2	SWI/SNF related, matrix associated, actin dependent regulator of chromatin, subfamily e, member 1		GO:0071565(nBAF complex)//GO:0071564(npBAF complex)//GO:0000790(nuclear chromatin)//GO:0043234(protein complex)//GO:0017053(transcriptional repressor complex)//GO:0000228(nuclear chromosome)//GO:0016514(SWI/SNF complex)//GO:0005654(nucleoplasm)//GO:0005634(nucleus)	GO:0047485(protein N-terminus binding)//GO:0008080(N-acetyltransferase activity)//GO:0000978(RNA polymerase II core promoter proximal region sequence-specific DNA binding)//GO:0003723(RNA binding)//GO:0003682(chromatin binding)//GO:0016922(ligand-dependent nuclear receptor binding)//GO:0000980(RNA polymerase II distal enhancer sequence-specific DNA binding)//GO:0031492(nucleosomal DNA binding)//G…	GO:0006337(nucleosome disassembly)//GO:0006338(chromatin remodeling)//GO:0006357(regulation of transcription from RNA polymerase II promoter)//GO:0022008(neurogenesis)//GO:0045892(negative regulation of transcription, DNA-templated)//GO:0043044(ATP-dependent chromatin remodeling)
GSDMB	ENSG00000073605	protein_coding	-	chr17:38060847-38076107	12.0518	2.53822	3.6888	2.24736	5e-05	0.000136014	up	55876	GSDML|PP4052|PRO2521	MIM:611221|HGNC:HGNC:23690|Ensembl:ENSG00000073605|HPRD:17082|Vega:OTTHUMG00000133248	17	17q12	gasdermin B		GO:0005737(cytoplasm)
ADAM11	ENSG00000073670	protein_coding	+	chr17:42836398-42859214	1.67632	0.269822	2.10763	2.63522	5e-05	0.000136014	up	4185	MDC	MIM:155120|HGNC:HGNC:189|Ensembl:ENSG00000073670|HPRD:01114|Vega:OTTHUMG00000179038	17	17q21.3	ADAM metallopeptidase domain 11		GO:0031012(extracellular matrix)//GO:0016021(integral component of membrane)//GO:0005886(plasma membrane)	GO:0008237(metallopeptidase activity)//GO:0008270(zinc ion binding)//GO:0004222(metalloendopeptidase activity)//GO:0005178(integrin binding)	GO:0006508(proteolysis)//GO:0007229(integrin-mediated signaling pathway)
PPP2R3A	ENSG00000073711	protein_coding	+	chr3:135684514-135866733	10.4447	5.02539	1.89941	1.05547	5e-05	0.000136014	up	5523	PPP2R3|PR130|PR72	MIM:604944|HGNC:HGNC:9307|Ensembl:ENSG00000073711|HPRD:09225|Vega:OTTHUMG00000159766	3	3q22.1	protein phosphatase 2 regulatory subunit B'', alpha	hsa03015(mRNA surveillance pathway)//hsa04071(Sphingolipid signaling pathway)//hsa04151(PI3K-Akt signaling pathway)//hsa04152(AMPK signaling pathway)//hsa04261(Adrenergic signaling in cardiomyocytes)//hsa04728(Dopaminergic synapse)	GO:0000159(protein phosphatase type 2A complex)	GO:0008601(protein phosphatase type 2A regulator activity)//GO:0030674(protein binding, bridging)//GO:0005515(protein binding)//GO:0005509(calcium ion binding)	GO:0045732(positive regulation of protein catabolic process)//GO:0090249(regulation of cell motility involved in somitogenic axis elongation)//GO:0001754(eye photoreceptor cell differentiation)//GO:0090244(Wnt signaling pathway involved in somitogenesis)//GO:0061053(somite development)//GO:0090263(positive regulation of canonical Wnt signaling pathway)//GO:0034047(regulation of protein phosphatas…
NSF	ENSG00000073969	protein_coding	+	chr17:44668034-44834830	9.29528	3.46026	2.30822	1.42562	5e-05	0.000136014	up	4905	SKD2	MIM:601633|HGNC:HGNC:8016|Ensembl:ENSG00000073969|HPRD:03380|Vega:OTTHUMG00000134315	17	17q21	N-ethylmaleimide sensitive factor	hsa04721(Synaptic vesicle cycle)//hsa04727(GABAergic synapse)//hsa04962(Vasopressin-regulated water reabsorption)	GO:0014069(postsynaptic density)//GO:0005886(plasma membrane)//GO:0043209(myelin sheath)//GO:0005829(cytosol)//GO:0005765(lysosomal membrane)//GO:0070062(extracellular exosome)//GO:0000139(Golgi membrane)//GO:0005795(Golgi stack)//GO:0043198(dendritic shaft)//GO:0005737(cytoplasm)	GO:0017137(Rab GTPase binding)//GO:0042623(ATPase activity, coupled)//GO:0032403(protein complex binding)//GO:0005524(ATP binding)//GO:0030165(PDZ domain binding)//GO:0017075(syntaxin-1 binding)//GO:0019901(protein kinase binding)//GO:0016887(ATPase activity)//GO:0046872(metal ion binding)//GO:0005515(protein binding)	GO:0061024(membrane organization)//GO:0044267(cellular protein metabolic process)//GO:0048211(Golgi vesicle docking)//GO:0001921(positive regulation of receptor recycling)//GO:0045026(plasma membrane fusion)//GO:0006887(exocytosis)//GO:0017157(regulation of exocytosis)//GO:0007268(synaptic transmission)//GO:0043001(Golgi to plasma membrane protein transport)//GO:0048208(COPII vesicle coating)//GO…
PTPLAD1	ENSG00000074696	protein_coding	+	chr15:65822755-65870687	12.7605	3.79393	2.8704	1.74992	5e-05	0.000136014	up
IPCEF1	ENSG00000074706	protein_coding	-	chr6:154331630-154677926	3.23221	1.15528	1.96365	1.48429	0.00045	0.00106569	up	26034	PIP3-E	HGNC:HGNC:21204|Ensembl:ENSG00000074706|HPRD:17851|Vega:OTTHUMG00000015872	6	6q25.2	interaction protein for cytohesin exchange factors 1		GO:0005886(plasma membrane)//GO:0005829(cytosol)	GO:0005344(oxygen transporter activity)//GO:0019904(protein domain specific binding)//GO:0004601(peroxidase activity)	GO:0098869(cellular oxidant detoxification)//GO:0015671(oxygen transport)//GO:0006979(response to oxidative stress)
TUBE1	ENSG00000074935	protein_coding	-	chr6:112375274-112408732	14.9744	5.66219	2.39777	1.40306	5e-05	0.000136014	up	51175	TUBE|dJ142L7.2	MIM:607345|HGNC:HGNC:20775|Ensembl:ENSG00000074935|HPRD:06298|Vega:OTTHUMG00000015382	6	6q21	tubulin epsilon 1		GO:0000242(pericentriolar material)//GO:0005874(microtubule)	GO:0003924(GTPase activity)//GO:0005525(GTP binding)//GO:0005200(structural constituent of cytoskeleton)	GO:0007098(centrosome cycle)//GO:0008152(metabolic process)//GO:0007017(microtubule-based process)
TIPIN	ENSG00000075131	protein_coding	-	chr15:66628543-66679084	3.11395	0.499974	2.74268	2.63882	0.0004	0.000954907	up	54962	-	MIM:610716|HGNC:HGNC:30750|Ensembl:ENSG00000075131|HPRD:16917|Vega:OTTHUMG00000133188	15	15q22.31	TIMELESS interacting protein		GO:0000790(nuclear chromatin)//GO:0005794(Golgi apparatus)//GO:0043231(intracellular membrane-bounded organelle)//GO:0005654(nucleoplasm)//GO:0005634(nucleus)//GO:0005737(cytoplasm)	GO:0005515(protein binding)	GO:0031573(intra-S DNA damage checkpoint)//GO:0008284(positive regulation of cell proliferation)//GO:0007067(mitotic nuclear division)//GO:0033262(regulation of nuclear cell cycle DNA replication)//GO:0006974(cellular response to DNA damage stimulus)//GO:0051301(cell division)//GO:0000076(DNA replication checkpoint)//GO:0006302(double-strand break repair)//GO:0007049(cell cycle)//GO:0044770(cell …
SRI	ENSG00000075142	protein_coding	-	chr7:87834432-87936206	53.7341	24.6356	2.13508	1.12509	5e-05	0.000136014	up	6717	CP-22|CP22|SCN|V19	MIM:182520|HGNC:HGNC:11292|Ensembl:ENSG00000075142|HPRD:01680|Vega:OTTHUMG00000157267	7	7q21.1	sorcin		GO:0030018(Z disc)//GO:0016529(sarcoplasmic reticulum)//GO:0070062(extracellular exosome)//GO:0043679(axon terminus)//GO:0042584(chromaffin granule membrane)//GO:0005790(smooth endoplasmic reticulum)//GO:0005789(endoplasmic reticulum membrane)//GO:0005829(cytosol)//GO:0033017(sarcoplasmic reticulum membrane)//GO:0030315(T-tubule)//GO:0005739(mitochondrion)//GO:0044326(dendritic spine neck)//GO:00…	GO:0002020(protease binding)//GO:0005102(receptor binding)//GO:0046982(protein heterodimerization activity)//GO:0042802(identical protein binding)//GO:0044325(ion channel binding)//GO:0005246(calcium channel regulator activity)//GO:0004198(calcium-dependent cysteine-type endopeptidase activity)//GO:0070491(repressing transcription factor binding)//GO:0005515(protein binding)//GO:0005509(calcium i…	GO:0010459(negative regulation of heart rate)//GO:0007517(muscle organ development)//GO:0010649(regulation of cell communication by electrical coupling)//GO:1901841(regulation of high voltage-gated calcium channel activity)//GO:0035774(positive regulation of insulin secretion involved in cellular response to glucose stimulus)//GO:0006508(proteolysis)//GO:0086004(regulation of cardiac muscle cell …
NUP37	ENSG00000075188	protein_coding	-	chr12:102457132-102513902	9.96657	4.26045	2.08472	1.22609	5e-05	0.000136014	up	79023	p37	MIM:609264|HGNC:HGNC:29929|Ensembl:ENSG00000075188|HPRD:14853	12	12q23.2	nucleoporin 37kDa	hsa03013(RNA transport)	GO:0000776(kinetochore)//GO:0005635(nuclear envelope)//GO:0031080(nuclear pore outer ring)//GO:0005829(cytosol)//GO:0005654(nucleoplasm)//GO:0005634(nucleus)//GO:0000777(condensed chromosome kinetochore)	GO:0005515(protein binding)	GO:0044267(cellular protein metabolic process)//GO:0051301(cell division)//GO:0005975(carbohydrate metabolic process)//GO:0007077(mitotic nuclear envelope disassembly)//GO:0043687(post-translational protein modification)//GO:0019054(modulation by virus of host process)//GO:0008645(hexose transport)//GO:0008033(tRNA processing)//GO:0031047(gene silencing by RNA)//GO:0015031(protein transport)//GO:…
SEMA3C	ENSG00000075223	protein_coding	-	chr7:80371853-80551675	59.842	15.3321	3.7253	1.96461	5e-05	0.000136014	up	10512	SEMAE|SemE	MIM:602645|HGNC:HGNC:10725|Ensembl:ENSG00000075223|HPRD:04034|Vega:OTTHUMG00000023447	7	7q21-q31	semaphorin 3C	hsa04360(Axon guidance)	GO:0070062(extracellular exosome)//GO:0005615(extracellular space)	GO:0038191(neuropilin binding)//GO:0045499(chemorepellent activity)//GO:0030215(semaphorin receptor binding)	GO:0007411(axon guidance)//GO:0003151(outflow tract morphogenesis)//GO:0071526(semaphorin-plexin signaling pathway)//GO:0060666(dichotomous subdivision of terminal units involved in salivary gland branching)//GO:0021915(neural tube development)//GO:0009791(post-embryonic development)//GO:0048843(negative regulation of axon extension involved in axon guidance)//GO:0001756(somitogenesis)//GO:000321…
CELSR1	ENSG00000075275	protein_coding	-	chr22:46756730-46933067	7.3141	2.44852	2.41092	1.57877	5e-05	0.000136014	up	9620	ADGRC1|CDHF9|FMI2|HFMI2|ME2	MIM:604523|HGNC:HGNC:1850|Ensembl:ENSG00000075275|HPRD:05160|Vega:OTTHUMG00000150423	22	22q13.3	cadherin EGF LAG seven-pass G-type receptor 1		GO:0005654(nucleoplasm)//GO:0005886(plasma membrane)//GO:0005887(integral component of plasma membrane)//GO:0016021(integral component of membrane)	GO:0046983(protein dimerization activity)//GO:0004930(G-protein coupled receptor activity)//GO:0004888(transmembrane signaling receptor activity)//GO:0005509(calcium ion binding)	GO:0060488(orthogonal dichotomous subdivision of terminal units involved in lung branching morphogenesis)//GO:0042249(establishment of planar polarity of embryonic epithelium)//GO:0001843(neural tube closure)//GO:0045176(apical protein localization)//GO:0042472(inner ear morphogenesis)//GO:0007156(homophilic cell adhesion via plasma membrane adhesion molecules)//GO:0090251(protein localization in…
ZNF638	ENSG00000075292	protein_coding	+	chr2:71503690-71662199	153.4	66.4092	2.29049	1.20784	5e-05	0.000136014	up	27332	NP220|ZFML|Zfp638	MIM:614349|HGNC:HGNC:17894|Ensembl:ENSG00000075292|HPRD:11736|Vega:OTTHUMG00000129735	2	2p13.1	zinc finger protein 638		GO:0005654(nucleoplasm)//GO:0043231(intracellular membrane-bounded organelle)//GO:0005634(nucleus)//GO:0016607(nuclear speck)//GO:0005737(cytoplasm)	GO:0003676(nucleic acid binding)//GO:0008270(zinc ion binding)//GO:0003723(RNA binding)//GO:0000166(nucleotide binding)//GO:0044822(poly(A) RNA binding)//GO:0003690(double-stranded DNA binding)	GO:0008380(RNA splicing)//GO:0006351(transcription, DNA-templated)//GO:0006355(regulation of transcription, DNA-templated)
TIMM21	ENSG00000075336	protein_coding	+	chr18:71815745-71826197	9.58255	3.63547	2.28295	1.39827	5e-05	0.000136014	up	29090	C18orf55|HSPC154|TIM21	MIM:615180|HGNC:HGNC:25010|HPRD:13706	18	18q22.3	translocase of inner mitochondrial membrane 21 homolog (yeast)		GO:0016021(integral component of membrane)//GO:0005744(mitochondrial inner membrane presequence translocase complex)	GO:0003674(molecular_function)//GO:0005515(protein binding)	GO:0032981(mitochondrial respiratory chain complex I assembly)//GO:0030150(protein import into mitochondrial matrix)//GO:0006626(protein targeting to mitochondrion)//GO:0044267(cellular protein metabolic process)//GO:0033617(mitochondrial respiratory chain complex IV assembly)
MOCOS	ENSG00000075643	protein_coding	+	chr18:33767481-33852120	1.52614	0.17536	2.14925	3.12149	5e-05	0.000136014	up	55034	HMCS|MCS|MOS	MIM:613274|HGNC:HGNC:18234|HPRD:17585	18	18q12	molybdenum cofactor sulfurase		GO:0005575(cellular_component)//GO:0005829(cytosol)	GO:0030170(pyridoxal phosphate binding)//GO:0016829(lyase activity)//GO:0030151(molybdenum ion binding)//GO:0008265(Mo-molybdopterin cofactor sulfurase activity)//GO:0005515(protein binding)//GO:0016740(transferase activity)	GO:0044281(small molecule metabolic process)//GO:0006777(Mo-molybdopterin cofactor biosynthetic process)//GO:0032324(molybdopterin cofactor biosynthetic process)//GO:0043545(molybdopterin cofactor metabolic process)//GO:0006767(water-soluble vitamin metabolic process)//GO:0006766(vitamin metabolic process)
SART3	ENSG00000075856	protein_coding	-	chr12:108908961-108955176	51.9002	21.3272	2.36932	1.28304	5e-05	0.000136014	up	9733	DSAP1|P100|RP11-13G14|TIP110|p110|p110(nrb)	MIM:611684|HGNC:HGNC:16860|Ensembl:ENSG00000075856|HPRD:11532|Vega:OTTHUMG00000169449	12	12q24.1	squamous cell carcinoma antigen recognized by T-cells 3		GO:0046540(U4/U6 x U5 tri-snRNP complex)//GO:0005691(U6atac snRNP)//GO:0071001(U4/U6 snRNP)//GO:0005654(nucleoplasm)//GO:0016607(nuclear speck)//GO:0015030(Cajal body)//GO:0005622(intracellular)//GO:0005634(nucleus)//GO:0071002(U4atac/U6atac snRNP)//GO:0005737(cytoplasm)	GO:0003676(nucleic acid binding)//GO:1990381(ubiquitin-specific protease binding)//GO:0030621(U4 snRNA binding)//GO:0042393(histone binding)//GO:0017070(U6 snRNA binding)//GO:0000166(nucleotide binding)//GO:0044822(poly(A) RNA binding)//GO:0030624(U6atac snRNA binding)//GO:0005515(protein binding)	GO:0000245(spliceosomal complex assembly)//GO:0000902(cell morphogenesis)//GO:0006396(RNA processing)//GO:0000398(mRNA splicing, via spliceosome)//GO:0000387(spliceosomal snRNP assembly)//GO:0048872(homeostasis of number of cells)//GO:0071425(hematopoietic stem cell proliferation)//GO:0006334(nucleosome assembly)//GO:0010468(regulation of gene expression)//GO:0000244(spliceosomal tri-snRNP comple…
EXOSC7	ENSG00000075914	protein_coding	+	chr3:44956748-45077563	27.1548	12.764	2.04554	1.08913	5e-05	0.000136014	up	23016	EAP1|RRP42|Rrp42p|hRrp42p|p8	MIM:606488|HGNC:HGNC:28112|Ensembl:ENSG00000075914|HPRD:09401|Vega:OTTHUMG00000133095	3	3p21.31	exosome component 7	hsa03018(RNA degradation)	GO:0000176(nuclear exosome (RNase complex))//GO:0000177(cytoplasmic exosome (RNase complex))//GO:0005829(cytosol)//GO:0005730(nucleolus)//GO:0005634(nucleus)//GO:0000178(exosome (RNase complex))	GO:0003723(RNA binding)//GO:0004532(exoribonuclease activity)//GO:0005515(protein binding)//GO:0017091(AU-rich element binding)//GO:0000175(3'-5'-exoribonuclease activity)	GO:0034475(U4 snRNA 3'-end processing)//GO:0034473(U1 snRNA 3'-end processing)//GO:0071028(nuclear mRNA surveillance)//GO:0043488(regulation of mRNA stability)//GO:0010467(gene expression)//GO:0071038(nuclear polyadenylation-dependent tRNA catabolic process)//GO:0071042(nuclear polyadenylation-dependent mRNA catabolic process)//GO:0034427(nuclear-transcribed mRNA catabolic process, exonucleolytic…
REXO2	ENSG00000076043	protein_coding	+	chr11:114262164-114321001	75.4677	28.0917	2.62851	1.42572	5e-05	0.000136014	up	25996	CGI-114|REX2|RFN|SFN	MIM:607149|HGNC:HGNC:17851|Ensembl:ENSG00000076043|HPRD:06192|Vega:OTTHUMG00000168271	11	11q23.2	RNA exonuclease 2	hsa03008(Ribosome biogenesis in eukaryotes)	GO:0005634(nucleus)//GO:0005759(mitochondrial matrix)//GO:0005739(mitochondrion)//GO:0005730(nucleolus)//GO:0005758(mitochondrial intermembrane space)//GO:0005925(focal adhesion)	GO:0003676(nucleic acid binding)//GO:0008408(3'-5' exonuclease activity)//GO:0000175(3'-5'-exoribonuclease activity)	GO:0090503(RNA phosphodiester bond hydrolysis, exonucleolytic)//GO:0090305(nucleic acid phosphodiester bond hydrolysis)//GO:0009117(nucleotide metabolic process)//GO:0006139(nucleobase-containing compound metabolic process)
PTPN23	ENSG00000076201	protein_coding	+	chr3:47422490-47454931	6.9839	2.81591	2.09227	1.31043	0.00075	0.00170242	up	25930	HD-PTP|HDPTP|PTP-TD14	MIM:606584|HGNC:HGNC:14406|Ensembl:ENSG00000076201|HPRD:05959|Vega:OTTHUMG00000133520	3	3p21.3	protein tyrosine phosphatase, non-receptor type 23		GO:0005768(endosome)//GO:0005634(nucleus)//GO:0070062(extracellular exosome)//GO:0005737(cytoplasm)//GO:0005654(nucleoplasm)//GO:0005769(early endosome)//GO:0036064(ciliary basal body)//GO:0016023(cytoplasmic, membrane-bounded vesicle)	GO:0019901(protein kinase binding)//GO:0005515(protein binding)//GO:0004725(protein tyrosine phosphatase activity)	GO:0060271(cilium morphogenesis)//GO:0043162(ubiquitin-dependent protein catabolic process via the multivesicular body sorting pathway)//GO:0010633(negative regulation of epithelial cell migration)//GO:1903387(positive regulation of homophilic cell adhesion)//GO:2000643(positive regulation of early endosome to late endosome transport)//GO:0015031(protein transport)//GO:1903393(positive regulation…
ANKRD13A	ENSG00000076513	protein_coding	+	chr12:110436990-110511491	26.8639	9.205	2.73042	1.54518	5e-05	0.000136014	up	88455	ANKRD13|NY-REN-25	MIM:615123|HGNC:HGNC:21268|Ensembl:ENSG00000076513|HPRD:12458|Vega:OTTHUMG00000169314	12	12q24.11	ankyrin repeat domain 13A		GO:0005886(plasma membrane)//GO:0005770(late endosome)
TPD52	ENSG00000076554	protein_coding	-	chr8:80830951-81143467	24.3282	0.778445	14.2418	4.96589	5e-05	0.000136014	up	7163	D52|N8L|PC-1|PrLZ|hD52	MIM:604068|HGNC:HGNC:12005|Ensembl:ENSG00000076554|HPRD:04963|Vega:OTTHUMG00000164565	8	8q21.13	tumor protein D52		GO:0005783(endoplasmic reticulum)//GO:0048471(perinuclear region of cytoplasm)//GO:0005737(cytoplasm)	GO:0046982(protein heterodimerization activity)//GO:0005515(protein binding)//GO:0005509(calcium ion binding)//GO:0042803(protein homodimerization activity)	GO:0009653(anatomical structure morphogenesis)//GO:0030183(B cell differentiation)//GO:0046903(secretion)
TRAF4	ENSG00000076604	protein_coding	+	chr17:27071001-27077974	13.1164	6.04918	2.00256	1.11656	5e-05	0.000136014	up	9618	CART1|MLN62|RNF83	MIM:602464|HGNC:HGNC:12034|Ensembl:ENSG00000076604|HPRD:03915|Vega:OTTHUMG00000132677	17	17q11-q12	TNF receptor associated factor 4	hsa05200(Pathways in cancer)//hsa05222(Small cell lung cancer)	GO:0005923(bicellular tight junction)//GO:0005886(plasma membrane)//GO:0048471(perinuclear region of cytoplasm)//GO:0005622(intracellular)//GO:0005634(nucleus)//GO:0005856(cytoskeleton)//GO:0005737(cytoplasm)	GO:0008270(zinc ion binding)//GO:0031625(ubiquitin protein ligase binding)//GO:0019901(protein kinase binding)//GO:0050699(WW domain binding)//GO:0004842(ubiquitin-protein transferase activity)//GO:0005164(tumor necrosis factor receptor binding)//GO:0031996(thioesterase binding)//GO:0005515(protein binding)//GO:0003677(DNA binding)	GO:0030323(respiratory tube development)//GO:0007585(respiratory gaseous exchange)//GO:0016567(protein ubiquitination)//GO:0090073(positive regulation of protein homodimerization activity)//GO:0045860(positive regulation of protein kinase activity)//GO:0046330(positive regulation of JNK cascade)//GO:0007250(activation of NF-kappaB-inducing kinase activity)//GO:0006915(apoptotic process)//GO:00429…
PAG1	ENSG00000076641	protein_coding	-	chr8:81880044-82024303	11.0193	1.00589	5.992	3.45349	5e-05	0.000136014	up	55824	CBP|PAG	MIM:605767|HGNC:HGNC:30043|Ensembl:ENSG00000076641|HPRD:05772|HPRD:16944|Vega:OTTHUMG00000164592	8	8q21.13	phosphoprotein membrane anchor with glycosphingolipid microdomains 1		GO:0005622(intracellular)//GO:0005886(plasma membrane)//GO:0045121(membrane raft)//GO:0016021(integral component of membrane)	GO:0005515(protein binding)//GO:0005070(SH3/SH2 adaptor activity)//GO:0042169(SH2 domain binding)	GO:0050868(negative regulation of T cell activation)//GO:0050863(regulation of T cell activation)//GO:0007173(epidermal growth factor receptor signaling pathway)//GO:0050852(T cell receptor signaling pathway)//GO:0009967(positive regulation of signal transduction)//GO:0002250(adaptive immune response)//GO:0035556(intracellular signal transduction)//GO:0007165(signal transduction)
GPATCH1	ENSG00000076650	protein_coding	+	chr19:33571785-33621448	7.18444	3.19948	1.94892	1.16704	5e-05	0.000136014	up	55094	ECGP|GPATC1	HGNC:HGNC:24658|Ensembl:ENSG00000076650|HPRD:11008|Vega:OTTHUMG00000180341	19	19q13.11	G-patch domain containing 1		GO:0071013(catalytic step 2 spliceosome)	GO:0003676(nucleic acid binding)	GO:0000398(mRNA splicing, via spliceosome)
CAMSAP3	ENSG00000076826	protein_coding	+	chr19:7660787-7683190	1.63916	0	2.63916	inf	5e-05	0.000136014	up	57662	KIAA1543|NEZHA|PPP1R80	MIM:612685|HGNC:HGNC:29307|Ensembl:ENSG00000076826|Vega:OTTHUMG00000182096	19	19p13.2	calmodulin regulated spectrin associated protein family member 3		GO:0036449(microtubule minus-end)//GO:0005915(zonula adherens)//GO:0005737(cytoplasm)//GO:0005813(centrosome)	GO:0030507(spectrin binding)//GO:0005516(calmodulin binding)//GO:0051011(microtubule minus-end binding)	GO:0090136(epithelial cell-cell adhesion)//GO:0070507(regulation of microtubule cytoskeleton organization)//GO:0031175(neuron projection development)//GO:0010923(negative regulation of phosphatase activity)//GO:0000226(microtubule cytoskeleton organization)//GO:0045218(zonula adherens maintenance)//GO:0033043(regulation of organelle organization)//GO:0034453(microtubule anchoring)
RARB	ENSG00000077092	protein_coding	+	chr3:25215822-25639423	15.6704	3.31908	3.85971	2.23919	5e-05	0.000136014	up	5915	HAP|MCOPS12|NR1B2|RRB2	MIM:180220|HGNC:HGNC:9865|Ensembl:ENSG00000077092|HPRD:07183|Vega:OTTHUMG00000130480	3	3p24.2	retinoic acid receptor beta	hsa05200(Pathways in cancer)//hsa05222(Small cell lung cancer)//hsa05223(Non-small cell lung cancer)	GO:0005654(nucleoplasm)//GO:0005634(nucleus)//GO:0005737(cytoplasm)	GO:0008270(zinc ion binding)//GO:0032403(protein complex binding)//GO:0003708(retinoic acid receptor activity)//GO:0043565(sequence-specific DNA binding)//GO:0003707(steroid hormone receptor activity)//GO:0000977(RNA polymerase II regulatory region sequence-specific DNA binding)//GO:0046965(retinoid X receptor binding)//GO:0008144(drug binding)//GO:0005515(protein binding)//GO:0003677(DNA binding)	GO:0000122(negative regulation of transcription from RNA polymerase II promoter)//GO:0002068(glandular epithelial cell development)//GO:0055012(ventricular cardiac muscle cell differentiation)//GO:0003406(retinal pigment epithelium development)//GO:0021756(striatum development)//GO:0008285(negative regulation of cell proliferation)//GO:0043066(negative regulation of apoptotic process)//GO:0043401…
GPR137B	ENSG00000077585	protein_coding	+	chr1:236305831-236445319	5.64724	2.44168	1.93139	1.20967	5e-05	0.000136014	up	7107	TM7SF1	MIM:604658|HGNC:HGNC:11862|Ensembl:ENSG00000077585|HPRD:06878|Vega:OTTHUMG00000037994	1	1q42-q43	G protein-coupled receptor 137B		GO:0005765(lysosomal membrane)//GO:0016020(membrane)//GO:0016021(integral component of membrane)//GO:0005887(integral component of plasma membrane)
FAP	ENSG00000078098	protein_coding	-	chr2:162970950-163101661	19.9113	4.66054	3.69422	2.09502	5e-05	0.000136014	up	2191	DPPIV|FAPA|SIMP	MIM:600403|HGNC:HGNC:3590|Ensembl:ENSG00000078098|HPRD:02674|Vega:OTTHUMG00000153890	2	2q23	fibroblast activation protein alpha		GO:0005886(plasma membrane)//GO:0071438(invadopodium membrane)//GO:0045177(apical part of cell)//GO:0030027(lamellipodium)//GO:0009986(cell surface)//GO:0031258(lamellipodium membrane)//GO:0016021(integral component of membrane)//GO:0045178(basal part of cell)//GO:0005737(cytoplasm)//GO:0032587(ruffle membrane)//GO:0005615(extracellular space)//GO:0005925(focal adhesion)	GO:0008233(peptidase activity)//GO:0002020(protease binding)//GO:0004222(metalloendopeptidase activity)//GO:0042803(protein homodimerization activity)//GO:0004175(endopeptidase activity)//GO:0004252(serine-type endopeptidase activity)//GO:0008239(dipeptidyl-peptidase activity)//GO:0008236(serine-type peptidase activity)//GO:0046983(protein dimerization activity)//GO:0005515(protein binding)//GO:0…	GO:0071158(positive regulation of cell cycle arrest)//GO:0010710(regulation of collagen catabolic process)//GO:0043542(endothelial cell migration)//GO:1900119(positive regulation of execution phase of apoptosis)//GO:0097325(melanocyte proliferation)//GO:0071850(mitotic cell cycle arrest)//GO:0007155(cell adhesion)//GO:0051917(regulation of fibrinolysis)//GO:0051603(proteolysis involved in cellula…
NEBL	ENSG00000078114	protein_coding	-	chr10:21068901-21463977	22.2928	6.90856	2.94526	1.69012	5e-05	0.000136014	up	10529	LASP2|LNEBL	MIM:605491|HGNC:HGNC:16932|Ensembl:ENSG00000078114|HPRD:10403|Vega:OTTHUMG00000017788	10	10p12	nebulette		GO:0030018(Z disc)//GO:0070062(extracellular exosome)//GO:0001725(stress fiber)//GO:0031674(I band)	GO:0005523(tropomyosin binding)//GO:0008307(structural constituent of muscle)//GO:0031005(filamin binding)//GO:0008092(cytoskeletal protein binding)//GO:0051015(actin filament binding)//GO:0005515(protein binding)	GO:0071691(cardiac muscle thin filament assembly)
PIK3C3	ENSG00000078142	protein_coding	+	chr18:39535170-39667794	59.8937	25.6457	2.28531	1.22368	5e-05	0.000136014	up	5289	VPS34|Vps34|hVps34	MIM:602609|HGNC:HGNC:8974|HPRD:04009	18	18q12.3	phosphatidylinositol 3-kinase catalytic subunit type 3	hsa00562(Inositol phosphate metabolism)//	GO:0005777(peroxisome)//GO:0034272(phosphatidylinositol 3-kinase complex, class III, type II)//GO:0005930(axoneme)//GO:0005776(autophagosome)//GO:0005770(late endosome)//GO:0034271(phosphatidylinositol 3-kinase complex, class III, type I)//GO:0005829(cytosol)//GO:0035032(phosphatidylinositol 3-kinase complex, class III)//GO:0030496(midbody)//GO:0016020(membrane)//GO:0005622(intracellular)//GO:000…	GO:0005524(ATP binding)//GO:0016773(phosphotransferase activity, alcohol group as acceptor)//GO:0016301(kinase activity)//GO:0016303(1-phosphatidylinositol-3-kinase activity)//GO:0005515(protein binding)//GO:0004672(protein kinase activity)	GO:0006644(phospholipid metabolic process)//GO:0042149(cellular response to glucose starvation)//GO:0046854(phosphatidylinositol phosphorylation)//GO:0043201(response to leucine)//GO:0032465(regulation of cytokinesis)//GO:0050708(regulation of protein secretion)//GO:0036092(phosphatidylinositol-3-phosphate biosynthetic process)//GO:0000910(cytokinesis)//GO:0006661(phosphatidylinositol biosyntheti…
ADCY2	ENSG00000078295	protein_coding	+	chr5:7396320-7830194	26.0592	9.28139	2.63186	1.48938	5e-05	0.000136014	up	108	AC2|HBAC2	MIM:103071|HGNC:HGNC:233|Ensembl:ENSG00000078295|HPRD:00052|Vega:OTTHUMG00000090476	5	5p15.3	adenylate cyclase 2 (brain)	hsa00230(Purine metabolism)//hsa04015(Rap1 signaling pathway)//hsa04020(Calcium signaling pathway)//hsa04022(cGMP-PKG signaling pathway)//hsa04024(cAMP signaling pathway)//hsa04062(Chemokine signaling pathway)//	GO:0005886(plasma membrane)//GO:0005887(integral component of plasma membrane)//GO:0016020(membrane)//GO:0030425(dendrite)//GO:0016021(integral component of membrane)//GO:0045121(membrane raft)//GO:0005622(intracellular)//GO:0005737(cytoplasm)	GO:0008179(adenylate cyclase binding)//GO:0005524(ATP binding)//GO:0016849(phosphorus-oxygen lyase activity)//GO:0046982(protein heterodimerization activity)//GO:0000287(magnesium ion binding)//GO:0000166(nucleotide binding)//GO:0030145(manganese ion binding)//GO:0004016(adenylate cyclase activity)	GO:0009190(cyclic nucleotide biosynthetic process)//GO:0006171(cAMP biosynthetic process)//GO:0003091(renal water homeostasis)//GO:0006112(energy reserve metabolic process)//GO:0007193(adenylate cyclase-inhibiting G-protein coupled receptor signaling pathway)//GO:1904322(cellular response to forskolin)//GO:0007268(synaptic transmission)//GO:0055085(transmembrane transport)//GO:0007189(adenylate c…
FKBP7	ENSG00000079150	protein_coding	-	chr2:179328390-179343327	9.68641	4.47294	1.95259	1.11474	5e-05	0.000136014	up	51661	FKBP23|PPIase	MIM:607062|HGNC:HGNC:3723|Ensembl:ENSG00000079150|HPRD:08451|Vega:OTTHUMG00000132577	2	2q31.2	FK506 binding protein 7		GO:0005788(endoplasmic reticulum lumen)//GO:0005789(endoplasmic reticulum membrane)	GO:0005528(FK506 binding)//GO:0003755(peptidyl-prolyl cis-trans isomerase activity)//GO:0005515(protein binding)//GO:0005509(calcium ion binding)	GO:0061077(chaperone-mediated protein folding)//GO:0000413(protein peptidyl-prolyl isomerization)//GO:0006457(protein folding)
LXN	ENSG00000079257	protein_coding	-	chr3:158362066-158410364	2.61777	1.15309	1.68027	1.18283	0.0302	0.0485318	up	56925	ECI|TCI	MIM:609305|HGNC:HGNC:13347|Ensembl:ENSG00000079257|HPRD:14327|Vega:OTTHUMG00000158807	3	3q25.32	latexin		GO:0070062(extracellular exosome)//GO:0005737(cytoplasm)	GO:0008201(heparin binding)//GO:0005515(protein binding)//GO:0008191(metalloendopeptidase inhibitor activity)	GO:0006954(inflammatory response)//GO:0050965(detection of temperature stimulus involved in sensory perception of pain)//GO:0010951(negative regulation of endopeptidase activity)
LIPE	ENSG00000079435	protein_coding	-	chr19:42901279-43156507	30.6029	13.9048	2.12032	1.13808	5e-05	0.000136014	up	3991	AOMS4|FPLD6|HSL|LHS	MIM:151750|HGNC:HGNC:6621|Ensembl:ENSG00000079435|HPRD:01062|Vega:OTTHUMG00000182814	19	19q13.2	lipase E, hormone sensitive type	hsa04024(cAMP signaling pathway)//hsa04152(AMPK signaling pathway)//hsa04910(Insulin signaling pathway)//hsa04923(Regulation of lipolysis in adipocytes)//	GO:0005811(lipid particle)//GO:0005901(caveola)//GO:0005829(cytosol)	GO:0033878(hormone-sensitive lipase activity)//GO:0019901(protein kinase binding)//GO:0004806(triglyceride lipase activity)//GO:0016298(lipase activity)//GO:0005515(protein binding)//GO:0016787(hydrolase activity)	GO:0008152(metabolic process)//GO:0044281(small molecule metabolic process)//GO:0016042(lipid catabolic process)//GO:0006468(protein phosphorylation)//GO:0042758(long-chain fatty acid catabolic process)//GO:0008203(cholesterol metabolic process)//GO:0046340(diacylglycerol catabolic process)//GO:0019433(triglyceride catabolic process)
RABL2B	ENSG00000079974	protein_coding	-	chr22:51195375-51239737	10.6093	3.27678	2.7145	1.69497	5e-05	0.000136014	up	11158	-	MIM:605413|HGNC:HGNC:9800|Ensembl:ENSG00000079974|HPRD:10395|Vega:OTTHUMG00000150156	22	22q13.33	RAB, member of RAS oncogene family-like 2B		GO:0005622(intracellular)	GO:0003924(GTPase activity)//GO:0005525(GTP binding)	GO:0007264(small GTPase mediated signal transduction)
DDX43	ENSG00000080007	protein_coding	+	chr6:74078277-74161999	2.86058	0.679087	2.29921	2.07464	5e-05	0.000136014	up	55510	CT13|HAGE	MIM:606286|HGNC:HGNC:18677|Ensembl:ENSG00000080007|HPRD:10448|Vega:OTTHUMG00000015033	6	6q13	DEAD-box helicase 43		GO:0005622(intracellular)	GO:0005524(ATP binding)//GO:0003723(RNA binding)//GO:0004004(ATP-dependent RNA helicase activity)	GO:0010501(RNA secondary structure unwinding)
DCT	ENSG00000080166	protein_coding	-	chr13:95089557-95131936	1.25111	0.205064	1.86804	2.60907	0.0001	0.00026153	up	1638	TRP-2|TYRP2	MIM:191275|HGNC:HGNC:2709|Ensembl:ENSG00000080166|HPRD:01864|Vega:OTTHUMG00000017206	13	13q32	dopachrome tautomerase	hsa00350(Tyrosine metabolism)//	GO:0033162(melanosome membrane)//GO:0016021(integral component of membrane)//GO:0042470(melanosome)//GO:0005829(cytosol)	GO:0005507(copper ion binding)//GO:0016491(oxidoreductase activity)//GO:0004167(dopachrome isomerase activity)//GO:0046872(metal ion binding)	GO:0055114(oxidation-reduction process)//GO:0021847(ventricular zone neuroblast division)//GO:0044281(small molecule metabolic process)//GO:0006583(melanin biosynthetic process from tyrosine)//GO:0048066(developmental pigmentation)//GO:0002052(positive regulation of neuroblast proliferation)//GO:0042438(melanin biosynthetic process)//GO:0048468(cell development)//GO:0034641(cellular nitrogen comp…
CPOX	ENSG00000080819	protein_coding	-	chr3:98216447-98312567	13.1505	4.26911	2.68556	1.62311	5e-05	0.000136014	up	1371	CPO|CPX|HCP	MIM:612732|HGNC:HGNC:2321|Ensembl:ENSG00000080819|HPRD:00417|Vega:OTTHUMG00000160016	3	3q12	coproporphyrinogen oxidase	hsa00860(Porphyrin and chlorophyll metabolism)//	GO:0016021(integral component of membrane)//GO:0005739(mitochondrion)//GO:0005758(mitochondrial intermembrane space)//GO:0005743(mitochondrial inner membrane)//GO:0005737(cytoplasm)	GO:0004109(coproporphyrinogen oxidase activity)//GO:0005212(structural constituent of eye lens)//GO:0042803(protein homodimerization activity)	GO:0055114(oxidation-reduction process)//GO:0006782(protoporphyrinogen IX biosynthetic process)//GO:0044281(small molecule metabolic process)//GO:0010288(response to lead ion)//GO:0051597(response to methylmercury)//GO:0010039(response to iron ion)//GO:0017085(response to insecticide)//GO:0006783(heme biosynthetic process)//GO:0006778(porphyrin-containing compound metabolic process)//GO:0046685(r…
AP4E1	ENSG00000081014	protein_coding	+	chr15:51200868-51298097	5.56422	1.81818	2.32924	1.61368	5e-05	0.000136014	up	23431	CPSQ4|SPG51	MIM:607244|HGNC:HGNC:573|Ensembl:ENSG00000081014|HPRD:06258|Vega:OTTHUMG00000172458	15	15q21.2	adaptor related protein complex 4 epsilon 1 subunit	hsa04142(Lysosome)	GO:0031904(endosome lumen)//GO:0030117(membrane coat)//GO:0032588(trans-Golgi network membrane)//GO:0005905(coated pit)		GO:0061024(membrane organization)//GO:0016192(vesicle-mediated transport)//GO:0006892(post-Golgi vesicle-mediated transport)//GO:0006886(intracellular protein transport)
AFP	ENSG00000081051	protein_coding	+	chr4:74296854-74321891	1.82072	0	2.82072	inf	5e-05	0.000136014	up	174	AFPD|FETA|HPAFP	MIM:104150|HGNC:HGNC:317|Ensembl:ENSG00000081051|HPRD:00074|Vega:OTTHUMG00000130011	4	4q13.3	alpha fetoprotein	hsa04390(Hippo signaling pathway)	GO:0005615(extracellular space)//GO:0005737(cytoplasm)	GO:0046872(metal ion binding)	GO:0060395(SMAD protein signal transduction)//GO:0031100(organ regeneration)//GO:0001542(ovulation from ovarian follicle)//GO:0001889(liver development)//GO:0031016(pancreas development)//GO:0006810(transport)//GO:0042448(progesterone metabolic process)//GO:0010033(response to organic substance)
COL4A4	ENSG00000081052	protein_coding	-	chr2:227867426-228028829	2.99163	0.840544	2.16872	1.83154	5e-05	0.000136014	up	1286	CA44	MIM:120131|HGNC:HGNC:2206|Ensembl:ENSG00000081052|HPRD:00360|Vega:OTTHUMG00000149892	2	2q35-q37	collagen type IV alpha 4	hsa04151(PI3K-Akt signaling pathway)//hsa04510(Focal adhesion)//hsa04512(ECM-receptor interaction)//	GO:0005605(basal lamina)//GO:0005587(collagen type IV trimer)//GO:0005788(endoplasmic reticulum lumen)//GO:0005576(extracellular region)	GO:0005201(extracellular matrix structural constituent)	GO:0030574(collagen catabolic process)//GO:0007411(axon guidance)//GO:0032836(glomerular basement membrane development)//GO:0022617(extracellular matrix disassembly)//GO:0030198(extracellular matrix organization)
JMJD4	ENSG00000081692	protein_coding	-	chr1:227916239-227968927	10.4897	2.77218	3.0459	1.91988	5e-05	0.000136014	up	65094	-	HGNC:HGNC:25724|Ensembl:ENSG00000081692|HPRD:07774|Vega:OTTHUMG00000037698	1	1q42.13	jumonji domain containing 4			GO:0005515(protein binding)
DUSP12	ENSG00000081721	protein_coding	+	chr1:161719547-161727028	12.7022	4.31371	2.57865	1.55808	5e-05	0.000136014	up	11266	DUSP1|YVH1	MIM:604835|HGNC:HGNC:3067|Ensembl:ENSG00000081721|HPRD:05323|Vega:OTTHUMG00000034540	1	1q21-q22	dual specificity phosphatase 12		GO:0005634(nucleus)//GO:0005737(cytoplasm)	GO:0019900(kinase binding)//GO:0008138(protein tyrosine/serine/threonine phosphatase activity)//GO:0008270(zinc ion binding)//GO:0005515(protein binding)//GO:0004725(protein tyrosine phosphatase activity)	GO:0033133(positive regulation of glucokinase activity)//GO:0006464(cellular protein modification process)//GO:0006470(protein dephosphorylation)//GO:0035335(peptidyl-tyrosine dephosphorylation)
AACS	ENSG00000081760	protein_coding	+	chr12:125549924-125627873	36.1932	16.5808	2.11556	1.12621	5e-05	0.000136014	up	65985	ACSF1|SUR-5	MIM:614364|HGNC:HGNC:21298|Ensembl:ENSG00000081760|HPRD:12391|Vega:OTTHUMG00000168550	12	12q24.31	acetoacetyl-CoA synthetase	hsa00280(Valine, leucine and isoleucine degradation)//hsa00650(Butanoate metabolism)	GO:0005829(cytosol)	GO:0005524(ATP binding)//GO:0005515(protein binding)//GO:0047760(butyrate-CoA ligase activity)//GO:0030729(acetoacetate-CoA ligase activity)	GO:0042594(response to starvation)//GO:0044255(cellular lipid metabolic process)//GO:0060612(adipose tissue development)//GO:0034201(response to oleic acid)//GO:0042493(response to drug)//GO:0032024(positive regulation of insulin secretion)//GO:0046951(ketone body biosynthetic process)//GO:0001889(liver development)//GO:0044281(small molecule metabolic process)//GO:0046950(cellular ketone body me…
WDR70	ENSG00000082068	protein_coding	+	chr5:37379313-37753537	29.8021	10.0272	2.79328	1.57149	5e-05	0.000136014	up	55100	-	HGNC:HGNC:25495|HPRD:08542	5	5p13.2	WD repeat domain 70			GO:0019899(enzyme binding)
STRADB	ENSG00000082146	protein_coding	+	chr2:202241929-202345569	12.3215	5.60785	2.01601	1.13566	5e-05	0.000136014	up	55437	ALS2CR2|CALS-21|ILPIP|ILPIPA|PAPK|PRO1038	MIM:607333|HGNC:HGNC:13205|Ensembl:ENSG00000082146|HPRD:09546|Vega:OTTHUMG00000132831	2	2q33.1	STE20-related kinase adaptor beta	hsa04152(AMPK signaling pathway)	GO:0016021(integral component of membrane)//GO:0005634(nucleus)//GO:0005737(cytoplasm)//GO:0005829(cytosol)	GO:0004672(protein kinase activity)//GO:0005524(ATP binding)//GO:0004709(MAP kinase kinase kinase activity)//GO:0005515(protein binding)	GO:0000902(cell morphogenesis)//GO:0032147(activation of protein kinase activity)//GO:0008286(insulin receptor signaling pathway)//GO:0007050(cell cycle arrest)//GO:0006468(protein phosphorylation)//GO:0007346(regulation of mitotic cell cycle)//GO:0042981(regulation of apoptotic process)//GO:0000186(activation of MAPKK activity)//GO:0031098(stress-activated protein kinase signaling cascade)//GO:2…
ME2	ENSG00000082212	protein_coding	+	chr18:48405418-48474691	21.4271	8.88914	2.26785	1.26932	5e-05	0.000136014	up	4200	ODS1	MIM:154270|HGNC:HGNC:6984|Ensembl:ENSG00000082212|HPRD:01103|Vega:OTTHUMG00000132694	18	18q21	malic enzyme 2, NAD(+)-dependent, mitochondrial	hsa00620(Pyruvate metabolism)//	GO:0043231(intracellular membrane-bounded organelle)//GO:0005739(mitochondrion)//GO:0005759(mitochondrial matrix)	GO:0004471(malate dehydrogenase (decarboxylating) (NAD+) activity)//GO:0008948(oxaloacetate decarboxylase activity)//GO:0051287(NAD binding)//GO:0009055(electron carrier activity)//GO:0004470(malic enzyme activity)//GO:0046872(metal ion binding)	GO:0055114(oxidation-reduction process)//GO:0006108(malate metabolic process)//GO:1902031(regulation of NADP metabolic process)
SERTAD4	ENSG00000082497	protein_coding	+	chr1:210404800-210419976	23.1985	5.26783	3.86075	2.13875	5e-05	0.000136014	up	56256	DJ667H12.2	HGNC:HGNC:25236|Ensembl:ENSG00000082497|HPRD:15328|Vega:OTTHUMG00000036391	1	1q32.1-q41	SERTA domain containing 4		GO:0005634(nucleus)
ITGB5	ENSG00000082781	protein_coding	-	chr3:124480794-124620265	233.681	102.194	2.27417	1.19323	5e-05	0.000136014	up	3693	-	MIM:147561|HGNC:HGNC:6160|Ensembl:ENSG00000082781|HPRD:00949|Vega:OTTHUMG00000159432	3	3q21.2	integrin subunit beta 5	hsa04145(Phagosome)//hsa04151(PI3K-Akt signaling pathway)//hsa04510(Focal adhesion)//hsa04512(ECM-receptor interaction)//hsa04810(Regulation of actin cytoskeleton)//hsa05205(Proteoglycans in cancer)//hsa05410(Hypertrophic cardiomyopathy (HCM))//hsa05412(Arrhythmogenic right ventricular cardiomyopathy (ARVC))//hsa05414(Dilated cardiomyopathy)	GO:0045335(phagocytic vesicle)//GO:0005886(plasma membrane)//GO:0070062(extracellular exosome)//GO:0043235(receptor complex)//GO:0009986(cell surface)//GO:0008305(integrin complex)//GO:0034684(integrin alphav-beta5 complex)//GO:0005925(focal adhesion)//GO:0031252(cell leading edge)	GO:0004872(receptor activity)//GO:0001618(virus receptor activity)//GO:0005515(protein binding)//GO:0005178(integrin binding)	GO:0090136(epithelial cell-cell adhesion)//GO:0042590(antigen processing and presentation of exogenous peptide antigen via MHC class I)//GO:0002479(antigen processing and presentation of exogenous peptide antigen via MHC class I, TAP-dependent)//GO:0035987(endodermal cell differentiation)//GO:0030198(extracellular matrix organization)//GO:0002474(antigen processing and presentation of peptide ant…
TRPM3	ENSG00000083067	protein_coding	-	chr9:73143978-74061820	3.70897	0.508449	3.12173	2.86684	5e-05	0.000136014	up	80036	GON-2|LTRPC3|MLSN2	MIM:608961|HGNC:HGNC:17992|Ensembl:ENSG00000083067|HPRD:10605|Vega:OTTHUMG00000019997	9	9q21.12	transient receptor potential cation channel subfamily M member 3		GO:0016021(integral component of membrane)//GO:0005886(plasma membrane)	GO:0005262(calcium channel activity)//GO:0005261(cation channel activity)//GO:0005227(calcium activated cation channel activity)	GO:0016048(detection of temperature stimulus)//GO:0070588(calcium ion transmembrane transport)//GO:0051262(protein tetramerization)//GO:0050951(sensory perception of temperature stimulus)//GO:0006812(cation transport)//GO:0007216(G-protein coupled glutamate receptor signaling pathway)//GO:0055085(transmembrane transport)//GO:0098655(cation transmembrane transport)//GO:0071482(cellular response to…
PALB2	ENSG00000083093	protein_coding	-	chr16:23614487-23652631	4.52132	1.75791	2.00199	1.36288	5e-05	0.000136014	up	79728	FANCN|PNCA3	MIM:610355|HGNC:HGNC:26144|Ensembl:ENSG00000083093|HPRD:07966|Vega:OTTHUMG00000177097	16	16p12.2	partner and localizer of BRCA2	hsa03460(Fanconi anemia pathway)	GO:0005654(nucleoplasm)	GO:0005515(protein binding)//GO:0003677(DNA binding)	GO:0007498(mesoderm development)//GO:0036342(post-anal tail morphogenesis)//GO:0009887(organ morphogenesis)//GO:0001833(inner cell mass cell proliferation)//GO:0045003(double-strand break repair via synthesis-dependent strand annealing)//GO:0048568(embryonic organ development)//GO:0001756(somitogenesis)//GO:0000724(double-strand break repair via homologous recombination)//GO:0006302(double-strand…
ITGAE	ENSG00000083457	protein_coding	-	chr17:3617921-3704537	11.8078	3.00501	3.19794	1.9743	5e-05	0.000136014	up	3682	CD103|HUMINAE	MIM:604682|HGNC:HGNC:6147|Ensembl:ENSG00000083457|HPRD:05249|Vega:OTTHUMG00000177634	17	17p13	integrin subunit alpha E	hsa04810(Regulation of actin cytoskeleton)	GO:0009897(external side of plasma membrane)//GO:0005886(plasma membrane)//GO:0008305(integrin complex)	GO:0046872(metal ion binding)	GO:0007229(integrin-mediated signaling pathway)//GO:0007155(cell adhesion)//GO:0030198(extracellular matrix organization)
NUFIP1	ENSG00000083635	protein_coding	-	chr13:45513383-45657260	1.54886	0.580396	1.6128	1.4161	5e-05	0.000136014	up	26747	NUFIP|bA540M5.1	MIM:604354|HGNC:HGNC:8057|Ensembl:ENSG00000083635|HPRD:05073|Vega:OTTHUMG00000016842	13	13q14	nuclear fragile X mental retardation protein interacting protein 1		GO:0005726(perichromatin fibrils)//GO:0043234(protein complex)//GO:0016363(nuclear matrix)//GO:0070761(pre-snoRNP complex)//GO:0048786(presynaptic active zone)//GO:0022626(cytosolic ribosome)//GO:0005730(nucleolus)//GO:0005634(nucleus)//GO:0008023(transcription elongation factor complex)	GO:0003723(RNA binding)//GO:0030674(protein binding, bridging)//GO:0042802(identical protein binding)//GO:0030515(snoRNA binding)//GO:0046872(metal ion binding)//GO:0005515(protein binding)//GO:0003677(DNA binding)//GO:0051117(ATPase binding)	GO:0051259(protein oligomerization)//GO:0000492(box C/D snoRNP assembly)//GO:0006396(RNA processing)//GO:0045944(positive regulation of transcription from RNA polymerase II promoter)
RRAGB	ENSG00000083750	protein_coding	+	chrX:55744171-55785207	18.2538	8.9718	1.93082	1.02473	5e-05	0.000136014	up	10325	RAGB|bA465E19.1	MIM:300725|HGNC:HGNC:19901|Ensembl:ENSG00000083750|HPRD:06710|Vega:OTTHUMG00000021662	X	Xp11.21	Ras related GTP binding B	hsa04150(mTOR signaling pathway)	GO:0005764(lysosome)//GO:0005794(Golgi apparatus)//GO:0005829(cytosol)//GO:0005765(lysosomal membrane)//GO:0043231(intracellular membrane-bounded organelle)//GO:1990131(Gtr1-Gtr2 GTPase complex)//GO:0005737(cytoplasm)	GO:0003924(GTPase activity)//GO:0005515(protein binding)//GO:0005525(GTP binding)//GO:0032561(guanyl ribonucleotide binding)	GO:0032006(regulation of TOR signaling)//GO:0071230(cellular response to amino acid stimulus)//GO:0034198(cellular response to amino acid starvation)//GO:0008286(insulin receptor signaling pathway)//GO:0007050(cell cycle arrest)//GO:0010467(gene expression)//GO:0034613(cellular protein localization)//GO:0006367(transcription initiation from RNA polymerase II promoter)//GO:0016236(macroautophagy)/…
EPYC	ENSG00000083782	protein_coding	-	chr12:91357455-91398803	2.0701	0	3.0701	inf	5e-05	0.000136014	up	1833	DSPG3|PGLB|Pg-Lb|SLRR3B	MIM:601657|HGNC:HGNC:3053|Ensembl:ENSG00000083782|HPRD:15988|Vega:OTTHUMG00000170072	12	12q21	epiphycan		GO:0005578(proteinaceous extracellular matrix)//GO:0005615(extracellular space)	GO:0048495(Roundabout binding)//GO:0005539(glycosaminoglycan binding)//GO:0008201(heparin binding)	GO:0007409(axonogenesis)//GO:0050770(regulation of axonogenesis)//GO:0035385(Roundabout signaling pathway)//GO:0007565(female pregnancy)//GO:0048846(axon extension involved in axon guidance)
SLC27A5	ENSG00000083807	protein_coding	-	chr19:58985383-59023780	5.11688	0.909454	3.20347	2.49219	0.0001	0.00026153	up	10998	ACSB|ACSVL6|BACS|BAL|FACVL3|FATP-5|FATP5|VLACSR|VLCS-H2|VLCSH2	MIM:603314|HGNC:HGNC:10999|Ensembl:ENSG00000083807|HPRD:04499|Vega:OTTHUMG00000183543	19	19q13.43	solute carrier family 27 member 5	hsa00120(Primary bile acid biosynthesis)//	GO:0016021(integral component of membrane)//GO:0009925(basal plasma membrane)//GO:0043234(protein complex)//GO:0005789(endoplasmic reticulum membrane)//GO:0030176(integral component of endoplasmic reticulum membrane)//GO:0005783(endoplasmic reticulum)	GO:0031957(very long-chain fatty acid-CoA ligase activity)//GO:0032403(protein complex binding)//GO:0005524(ATP binding)//GO:0047747(cholate-CoA ligase activity)//GO:0004467(long-chain fatty acid-CoA ligase activity)//GO:0015245(fatty acid transporter activity)	GO:0046951(ketone body biosynthetic process)//GO:0044281(small molecule metabolic process)//GO:0006642(triglyceride mobilization)//GO:0006699(bile acid biosynthetic process)//GO:0008206(bile acid metabolic process)//GO:0015721(bile acid and bile salt transport)//GO:0015911(plasma membrane long-chain fatty acid transport)//GO:0001676(long-chain fatty acid metabolic process)//GO:0000038(very long-c…
ZNF416	ENSG00000083817	protein_coding	-	chr19:58082933-58105145	3.94377	0.427252	3.46384	3.20642	5e-05	0.000136014	up	55659	-	HGNC:HGNC:20645|Ensembl:ENSG00000083817|HPRD:07926|Vega:OTTHUMG00000183467	19	19q13.4	zinc finger protein 416		GO:0005634(nucleus)	GO:0046872(metal ion binding)//GO:0003677(DNA binding)	GO:0006351(transcription, DNA-templated)//GO:0006355(regulation of transcription, DNA-templated)
KIAA1467	ENSG00000084444	protein_coding	+	chr12:13197217-13295455	7.12252	3.18219	1.94217	1.16237	5e-05	0.000136014	up
APOB	ENSG00000084674	protein_coding	-	chr2:21224300-21266945	2.19038	0.182254	2.69856	3.58716	5e-05	0.000136014	up	338	FLDB|LDLCQ4|apoB-100|apoB-48	MIM:107730|HGNC:HGNC:603|Ensembl:ENSG00000084674|HPRD:00133|Vega:OTTHUMG00000090785	2	2p24-p23	apolipoprotein B	hsa04975(Fat digestion and absorption)//hsa04977(Vitamin digestion and absorption)	GO:0071682(endocytic vesicle lumen)//GO:0005737(cytoplasm)//GO:0034359(mature chylomicron)//GO:0034363(intermediate-density lipoprotein particle)//GO:0010008(endosome membrane)//GO:0015629(actin cytoskeleton)//GO:0005794(Golgi apparatus)//GO:0034361(very-low-density lipoprotein particle)//GO:0042627(chylomicron)//GO:0034362(low-density lipoprotein particle)//GO:0043231(intracellular membrane-boun…	GO:0050750(low-density lipoprotein particle receptor binding)//GO:0005319(lipid transporter activity)//GO:0005515(protein binding)//GO:0017127(cholesterol transporter activity)//GO:0008201(heparin binding)//GO:0035473(lipase binding)//GO:0005543(phospholipid binding)	GO:0010269(response to selenium ion)//GO:0034374(low-density lipoprotein particle remodeling)//GO:0010628(positive regulation of gene expression)//GO:0071379(cellular response to prostaglandin stimulus)//GO:0007283(spermatogenesis)//GO:0009615(response to virus)//GO:0050900(leukocyte migration)//GO:0006766(vitamin metabolic process)//GO:0030317(sperm motility)//GO:0006775(fat-soluble vitamin meta…
OVGP1	ENSG00000085465	protein_coding	-	chr1:111956935-111970399	4.41968	0.913594	2.8322	2.27432	5e-05	0.000136014	up	5016	CHIT5|EGP|MUC9|OGP	MIM:603578|HGNC:HGNC:8524|Ensembl:ENSG00000085465|HPRD:04658|Vega:OTTHUMG00000011746	1	1p13	oviductal glycoprotein 1		GO:0005576(extracellular region)//GO:0030133(transport vesicle)//GO:0035805(egg coat)//GO:0005829(cytosol)//GO:0098595(perivitelline space)//GO:0005737(cytoplasm)	GO:0008061(chitin binding)//GO:0004568(chitinase activity)	GO:0007338(single fertilization)//GO:2000360(negative regulation of binding of sperm to zona pellucida)//GO:0032504(multicellular organism reproduction)//GO:0007565(female pregnancy)//GO:0007339(binding of sperm to zona pellucida)//GO:0005975(carbohydrate metabolic process)//GO:0006032(chitin catabolic process)
AKR1B1	ENSG00000085662	protein_coding	-	chr7:134127101-134144036	23.6733	8.60075	2.56993	1.46073	5e-05	0.000136014	up	231	ADR|ALDR1|ALR2|AR	MIM:103880|HGNC:HGNC:381|Ensembl:ENSG00000085662|HPRD:00071|Vega:OTTHUMG00000155322	7	7q35	aldo-keto reductase family 1, member B1 (aldose reductase)	hsa00040(Pentose and glucuronate interconversions)//hsa00051(Fructose and mannose metabolism)//hsa00052(Galactose metabolism)//hsa00561(Glycerolipid metabolism)//	GO:0033010(paranodal junction)//GO:0043220(Schmidt-Lanterman incisure)//GO:0070062(extracellular exosome)//GO:0097454(Schwann cell microvillus)//GO:0032838(cell projection cytoplasm)//GO:0048471(perinuclear region of cytoplasm)//GO:0042629(mast cell granule)//GO:0005829(cytosol)//GO:0005654(nucleoplasm)//GO:0005615(extracellular space)//GO:0005737(cytoplasm)	GO:0043795(glyceraldehyde oxidoreductase activity)//GO:0016491(oxidoreductase activity)//GO:0009055(electron carrier activity)//GO:0004032(alditol:NADP+ 1-oxidoreductase activity)//GO:0004033(aldo-keto reductase (NADP) activity)	GO:0009414(response to water deprivation)//GO:0070301(cellular response to hydrogen peroxide)//GO:0005975(carbohydrate metabolic process)//GO:0001894(tissue homeostasis)//GO:0018931(naphthalene metabolic process)//GO:0042415(norepinephrine metabolic process)//GO:0097238(cellular response to methylglyoxal)//GO:0060135(maternal process involved in female pregnancy)//GO:0044597(daunorubicin metaboli…
USP40	ENSG00000085982	protein_coding	-	chr2:234384165-234475428	33.8257	15.2102	2.14838	1.15308	5e-05	0.000136014	up	55230	-	MIM:610570|HGNC:HGNC:20069|Ensembl:ENSG00000085982|HPRD:07166|Vega:OTTHUMG00000153199	2	2q37.1	ubiquitin specific peptidase 40		GO:0005634(nucleus)//GO:0005737(cytoplasm)	GO:0036459(thiol-dependent ubiquitinyl hydrolase activity)//GO:0008234(cysteine-type peptidase activity)	GO:0016579(protein deubiquitination)//GO:0006511(ubiquitin-dependent protein catabolic process)
POMGNT1	ENSG00000085998	protein_coding	-	chr1:46654352-46686933	30.4005	12.7475	2.28409	1.25388	5e-05	0.000136014	up	55624	GNTI.2|GnT I.2|LGMD2O|MEB|MGAT1.2|gnT-I.2	MIM:606822|HGNC:HGNC:19139|Ensembl:ENSG00000085998|HPRD:09493|Vega:OTTHUMG00000007604	1	1p34.1	protein O-linked mannose N-acetylglucosaminyltransferase 1 (beta 1,2-)	hsa00514(Other types of O-glycan biosynthesis)	GO:0016021(integral component of membrane)//GO:0000139(Golgi membrane)	GO:0047223(beta-1,3-galactosyl-O-glycosyl-glycoprotein beta-1,3-N-acetylglucosaminyltransferase activity)//GO:0005515(protein binding)	GO:0006493(protein O-linked glycosylation)
RAD54L	ENSG00000085999	protein_coding	+	chr1:46713359-46769280	2.52899	0.455107	2.42524	2.47428	0.0001	0.00026153	up	8438	HR54|RAD54A|hHR54|hRAD54	MIM:603615|HGNC:HGNC:9826|Ensembl:ENSG00000085999|HPRD:04683|Vega:OTTHUMG00000007772	1	1p32	RAD54-like (S. cerevisiae)	hsa03440(Homologous recombination)	GO:0005654(nucleoplasm)//GO:0005634(nucleus)	GO:0005524(ATP binding)//GO:0036310(annealing helicase activity)//GO:0005515(protein binding)//GO:0003677(DNA binding)//GO:0004386(helicase activity)	GO:0008340(determination of adult lifespan)//GO:0007126(meiotic nuclear division)//GO:0051276(chromosome organization)//GO:0000733(DNA strand renaturation)//GO:0006310(DNA recombination)//GO:0010212(response to ionizing radiation)//GO:0000724(double-strand break repair via homologous recombination)//GO:0006281(DNA repair)//GO:0042493(response to drug)
DIMT1	ENSG00000086189	protein_coding	-	chr5:61601988-61924409	5.5677	2.63877	1.80492	1.07721	0.00145	0.00311578	up	27292	DIM1|DIMT1L|HSA9761|HUSSY5	MIM:612499|HGNC:HGNC:30217|HPRD:13676	5	5q12.1	DIM1 dimethyladenosine transferase 1 homolog		GO:0005730(nucleolus)//GO:0005634(nucleus)//GO:0005737(cytoplasm)	GO:0044822(poly(A) RNA binding)//GO:0052909(18S rRNA (adenine(1779)-N(6)/adenine(1780)-N(6))-dimethyltransferase activity)//GO:0000179(rRNA (adenine-N6,N6-)-dimethyltransferase activity)	GO:0031167(rRNA methylation)
MTMR2	ENSG00000087053	protein_coding	-	chr11:95566045-95658479	26.0782	12.1972	2.05181	1.0963	5e-05	0.000136014	up	8898	CMT4B|CMT4B1	MIM:603557|HGNC:HGNC:7450|Ensembl:ENSG00000087053|HPRD:04650|Vega:OTTHUMG00000153837	11	11q22	myotubularin related protein 2	hsa00562(Inositol phosphate metabolism)//	GO:0097060(synaptic membrane)//GO:0097481(neuronal postsynaptic density)//GO:0070062(extracellular exosome)//GO:0030425(dendrite)//GO:0030424(axon)//GO:0031901(early endosome membrane)//GO:0005829(cytosol)//GO:0005774(vacuolar membrane)//GO:0008021(synaptic vesicle)//GO:0005634(nucleus)//GO:0043197(dendritic spine)//GO:0005737(cytoplasm)	GO:0008138(protein tyrosine/serine/threonine phosphatase activity)//GO:0042803(protein homodimerization activity)//GO:0005515(protein binding)//GO:0004438(phosphatidylinositol-3-phosphatase activity)//GO:0052629(phosphatidylinositol-3,5-bisphosphate 3-phosphatase activity)//GO:0004725(protein tyrosine phosphatase activity)	GO:0006644(phospholipid metabolic process)//GO:0097062(dendritic spine maintenance)//GO:0031642(negative regulation of myelination)//GO:0046856(phosphatidylinositol dephosphorylation)//GO:0048666(neuron development)//GO:0090394(negative regulation of excitatory postsynaptic potential)//GO:0002091(negative regulation of receptor internalization)//GO:0051262(protein tetramerization)//GO:2000645(neg…
ADAMTS2	ENSG00000087116	protein_coding	-	chr5:178537851-178772431	28.6593	9.19319	2.90972	1.64037	5e-05	0.000136014	up	9509	ADAM-TS2|ADAMTS-2|ADAMTS-3|NPI|PC I-NP|PCI-NP|PCINP|PCPNI|PNPI	MIM:604539|HGNC:HGNC:218|Ensembl:ENSG00000087116|HPRD:05173|Vega:OTTHUMG00000130915	5	5qter	ADAM metallopeptidase with thrombospondin type 1 motif 2		GO:0005578(proteinaceous extracellular matrix)//GO:0005576(extracellular region)	GO:0008237(metallopeptidase activity)//GO:0008270(zinc ion binding)//GO:0004222(metalloendopeptidase activity)	GO:0043588(skin development)//GO:0030198(extracellular matrix organization)//GO:0016485(protein processing)//GO:0007283(spermatogenesis)//GO:0030199(collagen fibril organization)//GO:0030574(collagen catabolic process)//GO:0030324(lung development)
TXNDC16	ENSG00000087301	protein_coding	-	chr14:52897307-53019301	7.02326	1.92173	2.74606	1.86974	5e-05	0.000136014	up	57544	ERp90|KIAA1344	MIM:616179|HGNC:HGNC:19965|Ensembl:ENSG00000087301|HPRD:11140|Vega:OTTHUMG00000171103	14	14q22.1	thioredoxin domain containing 16		GO:0005623(cell)//GO:0005788(endoplasmic reticulum lumen)//GO:0070062(extracellular exosome)	GO:0005515(protein binding)	GO:0045454(cell redox homeostasis)//GO:0008150(biological_process)
TFAP2C	ENSG00000087510	protein_coding	+	chr20:55204357-55214339	1.3917	0.323804	1.80669	2.10366	0.00035	0.00084619	up	7022	AP2-GAMMA|ERF1|TFAP2G|hAP-2g	MIM:601602|HGNC:HGNC:11744|Ensembl:ENSG00000087510|HPRD:03361|Vega:OTTHUMG00000032805	20	20q13.2	transcription factor AP-2 gamma (activating enhancer binding protein 2 gamma)		GO:0005654(nucleoplasm)//GO:0005634(nucleus)//GO:0005739(mitochondrion)	GO:0003700(transcription factor activity, sequence-specific DNA binding)//GO:0005515(protein binding)//GO:0001047(core promoter binding)//GO:0000977(RNA polymerase II regulatory region sequence-specific DNA binding)//GO:0001078(transcriptional repressor activity, RNA polymerase II core promoter proximal region sequence-specific binding)//GO:0001077(transcriptional activator activity, RNA polymera…	GO:0045944(positive regulation of transcription from RNA polymerase II promoter)//GO:0060750(epithelial cell proliferation involved in mammary gland duct elongation)//GO:0048733(sebaceous gland development)//GO:0001829(trophectodermal cell differentiation)//GO:0021877(forebrain neuron fate commitment)//GO:0035019(somatic stem cell population maintenance)//GO:0007267(cell-cell signaling)//GO:00456…
PDRG1	ENSG00000088356	protein_coding	-	chr20:30435439-30539895	3.91754	1.2974	2.14048	1.59432	5e-05	0.000136014	up	81572	C20orf126|PDRG	MIM:610789|HGNC:HGNC:16119|HPRD:17833	20	20q11.21	p53 and DNA damage regulated 1		GO:0005737(cytoplasm)//GO:0016272(prefoldin complex)	GO:0051082(unfolded protein binding)	GO:0006457(protein folding)
TGDS	ENSG00000088451	protein_coding	-	chr13:95226307-95248529	4.79128	1.58823	2.23754	1.59299	5e-05	0.000136014	up	23483	CATMANS|SDR2E1|TDPGD	MIM:616146|HGNC:HGNC:20324|Ensembl:ENSG00000088451|HPRD:15494|Vega:OTTHUMG00000046308	13	13q32.1	TDP-glucose 4,6-dehydratase			GO:0008460(dTDP-glucose 4,6-dehydratase activity)	GO:0009225(nucleotide-sugar metabolic process)
CRLS1	ENSG00000088766	protein_coding	+	chr20:5986735-6020699	7.28844	3.02721	2.05811	1.26762	5e-05	0.000136014	up	54675	C20orf155|CLS|CLS1|GCD10|dJ967N21.6	MIM:608188|HGNC:HGNC:16148|Ensembl:ENSG00000088766|HPRD:12187|Vega:OTTHUMG00000031823	20	20p13-p12.3	cardiolipin synthase 1	hsa00564(Glycerophospholipid metabolism)//	GO:0016020(membrane)//GO:0005743(mitochondrial inner membrane)//GO:0005739(mitochondrion)//GO:0016021(integral component of membrane)	GO:0016780(phosphotransferase activity, for other substituted phosphate groups)//GO:0008808(cardiolipin synthase activity)	GO:0006644(phospholipid metabolic process)//GO:0008654(phospholipid biosynthetic process)//GO:0032049(cardiolipin biosynthetic process)//GO:0036148(phosphatidylglycerol acyl-chain remodeling)//GO:0046474(glycerophospholipid biosynthetic process)//GO:0044281(small molecule metabolic process)
ATRN	ENSG00000088812	protein_coding	+	chr20:3451686-3631769	15.2177	7.18684	1.98095	1.08232	5e-05	0.000136014	up	8455	DPPT-L|MGCA	MIM:603130|HGNC:HGNC:885|Ensembl:ENSG00000088812|HPRD:04388|Vega:OTTHUMG00000031746	20	20p13	attractin		GO:0005886(plasma membrane)//GO:0005887(integral component of plasma membrane)//GO:0005615(extracellular space)//GO:0005737(cytoplasm)//GO:0070062(extracellular exosome)	GO:0004872(receptor activity)//GO:0030246(carbohydrate binding)	GO:0006979(response to oxidative stress)//GO:0021549(cerebellum development)//GO:0042552(myelination)//GO:0040014(regulation of multicellular organism growth)//GO:0006954(inflammatory response)//GO:0043473(pigmentation)
ZNF343	ENSG00000088876	protein_coding	-	chr20:2442279-2505348	7.87888	2.45083	2.57297	1.68472	5e-05	0.000136014	up	79175	dJ734P14.5	HGNC:HGNC:16017|Ensembl:ENSG00000088876|HPRD:18327|Vega:OTTHUMG00000031701	20	20p13	zinc finger protein 343		GO:0005622(intracellular)//GO:0005634(nucleus)	GO:0003676(nucleic acid binding)//GO:0046872(metal ion binding)//GO:0005515(protein binding)//GO:0003677(DNA binding)	GO:0006351(transcription, DNA-templated)//GO:0006355(regulation of transcription, DNA-templated)
TESC	ENSG00000088992	protein_coding	-	chr12:117476727-117537284	1.79945	0.64584	1.70092	1.47831	0.00495	0.00955261	up	54997	CHP3|TSC	MIM:611585|HGNC:HGNC:26065|Ensembl:ENSG00000088992|HPRD:11649|Vega:OTTHUMG00000144168	12	12q24.22	tescalcin		GO:0005886(plasma membrane)//GO:0030027(lamellipodium)//GO:0001726(ruffle)//GO:0005634(nucleus)//GO:0032587(ruffle membrane)//GO:0005737(cytoplasm)	GO:0004860(protein kinase inhibitor activity)//GO:0042803(protein homodimerization activity)//GO:0019212(phosphatase inhibitor activity)//GO:0000287(magnesium ion binding)//GO:0005515(protein binding)//GO:0005509(calcium ion binding)	GO:0033628(regulation of cell adhesion mediated by integrin)//GO:1904030(negative regulation of cyclin-dependent protein kinase activity)//GO:0072661(protein targeting to plasma membrane)//GO:0071300(cellular response to retinoic acid)//GO:0008584(male gonad development)//GO:0010628(positive regulation of gene expression)//GO:0045654(positive regulation of megakaryocyte differentiation)//GO:00324…
MAPKAPK5	ENSG00000089022	protein_coding	+	chr12:112277570-112334343	19.4515	6.7053	2.65421	1.53651	5e-05	0.000136014	up	8550	MAPKAP-K5|MK-5|MK5|PRAK	MIM:606723|HGNC:HGNC:6889|HPRD:09467	12	12q24.13	mitogen-activated protein kinase-activated protein kinase 5	hsa04010(MAPK signaling pathway)	GO:0005654(nucleoplasm)//GO:0005737(cytoplasm)//GO:0005829(cytosol)	GO:0004674(protein serine/threonine kinase activity)//GO:0004672(protein kinase activity)//GO:0005516(calmodulin binding)//GO:0004708(MAP kinase kinase activity)//GO:0004683(calmodulin-dependent protein kinase activity)//GO:0005524(ATP binding)//GO:0009931(calcium-dependent protein serine/threonine kinase activity)//GO:0005515(protein binding)//GO:0002039(p53 binding)	GO:1904355(positive regulation of telomere capping)//GO:0032007(negative regulation of TOR signaling)//GO:0051973(positive regulation of telomerase activity)//GO:0032212(positive regulation of telomere maintenance via telomerase)//GO:0000187(activation of MAPK activity)//GO:0006468(protein phosphorylation)//GO:0006417(regulation of translation)//GO:0046777(protein autophosphorylation)//GO:0007265…
GCN1L1	ENSG00000089154	protein_coding	-	chr12:120565006-120632513	90.7309	28.155	3.14632	1.6882	5e-05	0.000136014	up
TRMT6	ENSG00000089195	protein_coding	-	chr20:5917880-5931182	8.3274	1.8317	3.29392	2.18468	5e-05	0.000136014	up	51605	CGI-09|GCD10|Gcd10p	HGNC:HGNC:20900|Ensembl:ENSG00000089195|HPRD:13027|Vega:OTTHUMG00000031816	20	20p12.3	tRNA methyltransferase 6		GO:0005654(nucleoplasm)//GO:0031515(tRNA (m1A) methyltransferase complex)	GO:0044822(poly(A) RNA binding)	GO:0030488(tRNA methylation)//GO:0010467(gene expression)//GO:0006400(tRNA modification)//GO:0008033(tRNA processing)
CMTM1	ENSG00000089505	protein_coding	+	chr16:66586465-66613040	1.58196	0.245628	2.07282	2.68716	5e-05	0.000136014	up	113540	CKLFH|CKLFH1|CKLFSF1	MIM:607884|HGNC:HGNC:19172|Ensembl:ENSG00000089505|HPRD:07433|Vega:OTTHUMG00000137502	16	16q21	CKLF like MARVEL transmembrane domain containing 1		GO:0016021(integral component of membrane)//GO:0005615(extracellular space)	GO:0005125(cytokine activity)	GO:0006935(chemotaxis)
ZBTB25	ENSG00000089775	protein_coding	-	chr14:64854748-65009955	11.0546	5.09718	1.97708	1.11688	5e-05	0.000136014	up	7597	C14orf51|KUP|ZNF46	MIM:194541|HGNC:HGNC:13112|Ensembl:ENSG00000089775|HPRD:01926|Vega:OTTHUMG00000141310	14	14q23-q24	zinc finger and BTB domain containing 25		GO:0005654(nucleoplasm)//GO:0005737(cytoplasm)	GO:0046872(metal ion binding)//GO:0005515(protein binding)//GO:0003677(DNA binding)//GO:0003700(transcription factor activity, sequence-specific DNA binding)	GO:0010467(gene expression)//GO:0006351(transcription, DNA-templated)//GO:0006355(regulation of transcription, DNA-templated)
RCOR1	ENSG00000089902	protein_coding	+	chr14:103058997-103196913	23.0927	6.50805	3.20892	1.82714	5e-05	0.000136014	up	23186	COREST|RCOR	MIM:607675|HGNC:HGNC:17441|Ensembl:ENSG00000089902|HPRD:09645|Vega:OTTHUMG00000171778	14	14q32.31	REST corepressor 1	hsa05016(Huntington's disease)	GO:0005654(nucleoplasm)//GO:0005634(nucleus)//GO:0017053(transcriptional repressor complex)//GO:1990391(DNA repair complex)	GO:0044212(transcription regulatory region DNA binding)//GO:0005515(protein binding)//GO:0003677(DNA binding)//GO:0001078(transcriptional repressor activity, RNA polymerase II core promoter proximal region sequence-specific binding)	GO:0006325(chromatin organization)//GO:0007596(blood coagulation)//GO:0006351(transcription, DNA-templated)//GO:0045892(negative regulation of transcription, DNA-templated)//GO:0016032(viral process)//GO:0000122(negative regulation of transcription from RNA polymerase II promoter)//GO:0070933(histone H4 deacetylation)
MRPS33	ENSG00000090263	protein_coding	-	chr7:140705853-140715028	20.7872	4.41878	4.02068	2.23397	5e-05	0.000136014	up	51650	CGI-139|MRP-S33|PTD003|S33mt	MIM:611993|HGNC:HGNC:16634|Ensembl:ENSG00000090263|HPRD:17598|Vega:OTTHUMG00000157456	7	7q34	mitochondrial ribosomal protein S33		GO:0005763(mitochondrial small ribosomal subunit)//GO:0005743(mitochondrial inner membrane)//GO:0005739(mitochondrion)	GO:0003735(structural constituent of ribosome)	GO:0070124(mitochondrial translational initiation)//GO:0006996(organelle organization)//GO:0006412(translation)//GO:0032543(mitochondrial translation)//GO:0070125(mitochondrial translational elongation)//GO:0070126(mitochondrial translational termination)
LEPREL1	ENSG00000090530	protein_coding	-	chr3:189674516-189862635	8.6114	3.34995	2.20954	1.36211	5e-05	0.000136014	up
CD209	ENSG00000090659	protein_coding	-	chr19:7804878-7812464	1.883	0.566058	1.84093	1.73401	0.00155	0.0033119	up	30835	CDSIGN|CLEC4L|DC-SIGN|DC-SIGN1	MIM:604672|HGNC:HGNC:1641|Ensembl:ENSG00000090659|HPRD:05241|Vega:OTTHUMG00000182530	19	19p13	CD209 molecule	hsa04145(Phagosome)//hsa05152(Tuberculosis)//hsa05162(Measles)	GO:0005886(plasma membrane)//GO:0070062(extracellular exosome)//GO:0009986(cell surface)//GO:0016020(membrane)//GO:0016021(integral component of membrane)//GO:0005737(cytoplasm)	GO:0001618(virus receptor activity)//GO:0046790(virion binding)//GO:0042605(peptide antigen binding)//GO:0030246(carbohydrate binding)//GO:0005537(mannose binding)//GO:0046872(metal ion binding)//GO:0005515(protein binding)	GO:0006897(endocytosis)//GO:0007159(leukocyte cell-cell adhesion)//GO:0045087(innate immune response)//GO:0002223(stimulatory C-type lectin receptor signaling pathway)//GO:0007157(heterophilic cell-cell adhesion via plasma membrane cell adhesion molecules)//GO:0042129(regulation of T cell proliferation)//GO:0009988(cell-cell recognition)//GO:0046968(peptide antigen transport)//GO:0019079(viral ge…
FCGBP	ENSG00000090920	protein_coding	-	chr19:40353962-40440533	1.34506	0.291492	1.81578	2.20614	0.00015	0.000384245	up	8857	FC(GAMMA)BP	HGNC:HGNC:13572|Ensembl:ENSG00000275395|HPRD:10956|Vega:OTTHUMG00000182580	19	19q13.1	Fc fragment of IgG binding protein		GO:0070062(extracellular exosome)	GO:0005515(protein binding)
NAT14	ENSG00000090971	protein_coding	+	chr19:55996370-55998935	6.79219	2.17128	2.45711	1.64533	5e-05	0.000136014	up	57106	KLP1	HGNC:HGNC:28918|Ensembl:ENSG00000090971|HPRD:10036|Vega:OTTHUMG00000180854	19	19q13.42	N-acetyltransferase 14 (putative)		GO:0016021(integral component of membrane)//GO:0005634(nucleus)	GO:0003677(DNA binding)//GO:0008080(N-acetyltransferase activity)	GO:0006352(DNA-templated transcription, initiation)//GO:0008152(metabolic process)//GO:0045893(positive regulation of transcription, DNA-templated)
PUS7	ENSG00000091127	protein_coding	-	chr7:105080107-105162714	11.7228	2.01401	4.22122	2.54117	5e-05	0.000136014	up	54517	-	MIM:616261|HGNC:HGNC:26033|Ensembl:ENSG00000091127|HPRD:07914|Vega:OTTHUMG00000157399	7	7q22.3	pseudouridylate synthase 7 (putative)		GO:0005634(nucleus)	GO:0044822(poly(A) RNA binding)//GO:0003723(RNA binding)//GO:0009982(pseudouridine synthase activity)//GO:0019899(enzyme binding)	GO:0010467(gene expression)//GO:0006400(tRNA modification)//GO:0001522(pseudouridine synthesis)//GO:0008033(tRNA processing)
NRCAM	ENSG00000091129	protein_coding	-	chr7:107788067-108097161	1.67889	0.572371	1.70373	1.55248	0.00205	0.00427248	up	4897	-	MIM:601581|HGNC:HGNC:7994|Ensembl:ENSG00000091129|HPRD:07207|Vega:OTTHUMG00000154973	7	7q31	neuronal cell adhesion molecule	hsa04514(Cell adhesion molecules (CAMs))	GO:0009897(external side of plasma membrane)//GO:0005887(integral component of plasma membrane)//GO:0005576(extracellular region)//GO:0005886(plasma membrane)//GO:0043005(neuron projection)//GO:0016021(integral component of membrane)//GO:0045202(synapse)//GO:0043194(axon initial segment)	GO:0030506(ankyrin binding)//GO:0005515(protein binding)//GO:0086080(protein binding involved in heterotypic cell-cell adhesion)	GO:0007409(axonogenesis)//GO:0030516(regulation of axon extension)//GO:0007411(axon guidance)//GO:0007416(synapse assembly)//GO:0045666(positive regulation of neuron differentiation)//GO:0034113(heterotypic cell-cell adhesion)//GO:0008104(protein localization)//GO:0007413(axonal fasciculation)//GO:0045162(clustering of voltage-gated sodium channels)//GO:0019227(neuronal action potential propagati…
ABCC6	ENSG00000091262	protein_coding	-	chr16:16242784-16318118	1.68469	0.644009	1.63301	1.38733	0.0001	0.00026153	up	368	ABC34|ARA|EST349056|GACI2|MLP1|MOAT-E|MOATE|MRP6|PXE|PXE1|URG7	MIM:603234|HGNC:HGNC:57|Ensembl:ENSG00000091262|HPRD:04453|Vega:OTTHUMG00000129967	16	16p13.1	ATP binding cassette subfamily C member 6	hsa02010(ABC transporters)	GO:0016021(integral component of membrane)//GO:0016328(lateral plasma membrane)//GO:0005789(endoplasmic reticulum membrane)//GO:0005886(plasma membrane)//GO:0016323(basolateral plasma membrane)//GO:0005634(nucleus)//GO:0016324(apical plasma membrane)	GO:0005524(ATP binding)//GO:0005215(transporter activity)//GO:0042626(ATPase activity, coupled to transmembrane movement of substances)	GO:0055085(transmembrane transport)//GO:0006810(transport)//GO:0008152(metabolic process)//GO:0007601(visual perception)//GO:0042493(response to drug)
MYO15A	ENSG00000091536	protein_coding	+	chr17:18012019-18113268	1.77475	0.571672	1.76548	1.63436	0.0002	0.000503289	up	51168	DFNB3|MYO15	MIM:602666|HGNC:HGNC:7594|Ensembl:ENSG00000091536|HPRD:04049|Vega:OTTHUMG00000059390	17	17p11.2	myosin XVA		GO:0070062(extracellular exosome)//GO:0032420(stereocilium)//GO:0016459(myosin complex)//GO:0005737(cytoplasm)//GO:0005856(cytoskeleton)	GO:0005524(ATP binding)//GO:0003774(motor activity)//GO:0005516(calmodulin binding)//GO:0003779(actin binding)	GO:0007605(sensory perception of sound)//GO:0008152(metabolic process)//GO:0007626(locomotory behavior)//GO:0042472(inner ear morphogenesis)
TMEM101	ENSG00000091947	protein_coding	-	chr17:42088555-42101314	11.2095	3.42094	2.76174	1.71225	5e-05	0.000136014	up	84336	-	HGNC:HGNC:28653|Ensembl:ENSG00000091947|HPRD:14623|Vega:OTTHUMG00000181803	17	17q21.31	transmembrane protein 101		GO:0016021(integral component of membrane)//GO:0005575(cellular_component)	GO:0004871(signal transducer activity)	GO:0043123(positive regulation of I-kappaB kinase/NF-kappaB signaling)//GO:0007165(signal transduction)
CCDC80	ENSG00000091986	protein_coding	-	chr3:112323406-112368377	158.448	69.3702	2.26585	1.19163	5e-05	0.000136014	up	151887	DRO1|SSG1|URB|okuribin	MIM:608298|HGNC:HGNC:30649|HPRD:10508	3	3q13.2	coiled-coil domain containing 80		GO:0005604(basement membrane)//GO:0016021(integral component of membrane)//GO:0005614(interstitial matrix)	GO:0008201(heparin binding)//GO:0001968(fibronectin binding)	GO:0010811(positive regulation of cell-substrate adhesion)//GO:0030198(extracellular matrix organization)
SLC22A17	ENSG00000092096	protein_coding	-	chr14:23815514-23822121	17.1053	7.70567	2.07971	1.15045	5e-05	0.000136014	up	51310	24p3R|BOCT|BOIT|NGALR|NGALR2|NGALR3|hBOIT	MIM:611461|HGNC:HGNC:23095|Ensembl:ENSG00000092096|HPRD:15349|Vega:OTTHUMG00000028740	14	14q11.2	solute carrier family 22 member 17		GO:0005774(vacuolar membrane)//GO:0016021(integral component of membrane)//GO:0005887(integral component of plasma membrane)//GO:0005886(plasma membrane)//GO:0031301(integral component of organelle membrane)	GO:0008514(organic anion transmembrane transporter activity)//GO:0022857(transmembrane transporter activity)//GO:0004888(transmembrane signaling receptor activity)	GO:0015891(siderophore transport)//GO:0055085(transmembrane transport)//GO:0006879(cellular iron ion homeostasis)//GO:0015711(organic anion transport)//GO:0007165(signal transduction)
GEMIN2	ENSG00000092208	protein_coding	+	chr14:39583426-39606177	11.6593	2.07636	4.11503	2.48935	5e-05	0.000136014	up	8487	SIP1|SIP1-delta	MIM:602595|HGNC:HGNC:10884|Ensembl:ENSG00000092208|HPRD:03999|Vega:OTTHUMG00000028816	14	14q13	gem nuclear organelle associated protein 2	hsa03013(RNA transport)	GO:0097504(Gemini of coiled bodies)//GO:0032797(SMN complex)//GO:0005829(cytosol)//GO:0034719(SMN-Sm protein complex)//GO:0005681(spliceosomal complex)//GO:0005730(nucleolus)//GO:0005654(nucleoplasm)//GO:0005634(nucleus)//GO:0005737(cytoplasm)	GO:0005515(protein binding)	GO:0000245(spliceosomal complex assembly)//GO:0008380(RNA splicing)//GO:0000387(spliceosomal snRNP assembly)//GO:0010467(gene expression)//GO:0000375(RNA splicing, via transesterification reactions)//GO:0034660(ncRNA metabolic process)//GO:0006397(mRNA processing)
TYRO3	ENSG00000092445	protein_coding	+	chr15:41849872-41871536	8.12191	3.88081	1.86893	1.06546	5e-05	0.000136014	up	7301	BYK|Dtk|Etk-2|RSE|Rek|Sky|Tif	MIM:600341|HGNC:HGNC:12446|HPRD:02641	15	15q15	TYRO3 protein tyrosine kinase		GO:0016021(integral component of membrane)//GO:0005634(nucleus)//GO:0005789(endoplasmic reticulum membrane)//GO:0005887(integral component of plasma membrane)//GO:0005635(nuclear envelope)	GO:0004713(protein tyrosine kinase activity)//GO:0005524(ATP binding)//GO:0046982(protein heterodimerization activity)//GO:0004716(receptor signaling protein tyrosine kinase activity)//GO:0004714(transmembrane receptor protein tyrosine kinase activity)//GO:0043548(phosphatidylinositol 3-kinase binding)//GO:0001618(virus receptor activity)//GO:0005515(protein binding)	GO:0030168(platelet activation)//GO:0007283(spermatogenesis)//GO:0060068(vagina development)//GO:0051250(negative regulation of lymphocyte activation)//GO:0050728(negative regulation of inflammatory response)//GO:0014065(phosphatidylinositol 3-kinase signaling)//GO:0045824(negative regulation of innate immune response)//GO:0070050(neuron cellular homeostasis)//GO:0001779(natural killer cell diffe…
CAPN3	ENSG00000092529	protein_coding	+	chr15:42500610-42704516	8.93104	2.88874	2.55379	1.62839	5e-05	0.000136014	up	825	CANP3|CANPL3|LGMD2|LGMD2A|nCL-1|p94	MIM:114240|HGNC:HGNC:1480|Ensembl:ENSG00000092529|HPRD:00255|Vega:OTTHUMG00000130619	15	15q15.1	calpain 3		GO:0030018(Z disc)//GO:0005886(plasma membrane)//GO:0043234(protein complex)//GO:0005829(cytosol)//GO:0030016(myofibril)//GO:0030315(T-tubule)//GO:0005622(intracellular)//GO:0005634(nucleus)//GO:0005737(cytoplasm)	GO:0008233(peptidase activity)//GO:0008307(structural constituent of muscle)//GO:0008234(cysteine-type peptidase activity)//GO:0055103(ligase regulator activity)//GO:0004871(signal transducer activity)//GO:0004198(calcium-dependent cysteine-type endopeptidase activity)//GO:0031432(titin binding)//GO:0031402(sodium ion binding)//GO:0003824(catalytic activity)//GO:0005515(protein binding)//GO:00329…	GO:0033234(negative regulation of protein sumoylation)//GO:0007517(muscle organ development)//GO:0045862(positive regulation of proteolysis)//GO:0043066(negative regulation of apoptotic process)//GO:0006508(proteolysis)//GO:0006461(protein complex assembly)//GO:0045661(regulation of myoblast differentiation)//GO:0045893(positive regulation of transcription, DNA-templated)//GO:0061061(muscle struc…
COL9A3	ENSG00000092758	protein_coding	+	chr20:61447595-61493115	31.6496	12.5425	2.4109	1.33536	5e-05	0.000136014	up	1299	DJ885L7.4.1|EDM3|IDD|MED	MIM:120270|HGNC:HGNC:2219|Ensembl:ENSG00000092758|HPRD:00374|Vega:OTTHUMG00000032938	20	20q13.3	collagen type IX alpha 3	hsa04151(PI3K-Akt signaling pathway)//hsa04510(Focal adhesion)//hsa04512(ECM-receptor interaction)//hsa04974(Protein digestion and absorption)	GO:0005578(proteinaceous extracellular matrix)//GO:0005594(collagen type IX trimer)//GO:0005576(extracellular region)//GO:0005788(endoplasmic reticulum lumen)	GO:0030020(extracellular matrix structural constituent conferring tensile strength)	GO:0007411(axon guidance)//GO:0022617(extracellular matrix disassembly)//GO:0030198(extracellular matrix organization)//GO:0008584(male gonad development)//GO:0030574(collagen catabolic process)//GO:0008585(female gonad development)
EZR	ENSG00000092820	protein_coding	-	chr6:159186772-159243272	56.6015	17.5272	3.10902	1.69125	5e-05	0.000136014	up	7430	CVIL|CVL|HEL-S-105|VIL2	MIM:123900|HGNC:HGNC:12691|Ensembl:ENSG00000092820|HPRD:00475|Vega:OTTHUMG00000015917	6	6q25.3	ezrin	hsa04670(Leukocyte transendothelial migration)//hsa04810(Regulation of actin cytoskeleton)//hsa04971(Gastric acid secretion)//hsa05130(Pathogenic Escherichia coli infection)//hsa05205(Proteoglycans in cancer)//hsa05206(MicroRNAs in cancer)	GO:0001726(ruffle)//GO:0044297(cell body)//GO:0032587(ruffle membrane)//GO:0005737(cytoplasm)//GO:0001772(immunological synapse)//GO:0005768(endosome)//GO:0001931(uropod)//GO:0030863(cortical cytoskeleton)//GO:0045177(apical part of cell)//GO:0016020(membrane)//GO:0071944(cell periphery)//GO:0015629(actin cytoskeleton)//GO:0030175(filopodium)//GO:0005884(actin filament)//GO:0016323(basolateral pl…	GO:0034236(protein kinase A catalytic subunit binding)//GO:0019904(protein domain specific binding)//GO:0003779(actin binding)//GO:0034237(protein kinase A regulatory subunit binding)//GO:0051015(actin filament binding)//GO:0044822(poly(A) RNA binding)//GO:0008017(microtubule binding)//GO:0005515(protein binding)//GO:0050839(cell adhesion molecule binding)//GO:0044548(S100 protein binding)//GO:00…	GO:1900041(negative regulation of interleukin-2 secretion)//GO:0050714(positive regulation of protein secretion)//GO:1902896(terminal web assembly)//GO:0010628(positive regulation of gene expression)//GO:0072697(protein localization to cell cortex)//GO:0003376(sphingosine-1-phosphate signaling pathway)//GO:0061028(establishment of endothelial barrier)//GO:0030033(microvillus assembly)//GO:0031623…
MFSD11	ENSG00000092931	protein_coding	+	chr17:74722911-74778303	24.4108	9.44577	2.43264	1.36978	5e-05	0.000136014	up	79157	ET	HGNC:HGNC:25458|Ensembl:ENSG00000092931|HPRD:13281|Vega:OTTHUMG00000180484	17	17q25	major facilitator superfamily domain containing 11		GO:0016021(integral component of membrane)//GO:0005575(cellular_component)	GO:0003674(molecular_function)	GO:0008150(biological_process)
XYLB	ENSG00000093217	protein_coding	+	chr3:38388250-38467813	6.8752	1.54589	3.0933	2.15297	5e-05	0.000136014	up	9942	-	MIM:604049|HGNC:HGNC:12839|Ensembl:ENSG00000093217|HPRD:06812|Vega:OTTHUMG00000131294	3	3p22-p21.3	xylulokinase homolog (H. influenzae)	hsa00040(Pentose and glucuronate interconversions)//	GO:0070062(extracellular exosome)//GO:0005737(cytoplasm)//GO:0005829(cytosol)	GO:0005524(ATP binding)//GO:0004856(xylulokinase activity)	GO:0019640(glucuronate catabolic process to xylulose 5-phosphate)//GO:0044281(small molecule metabolic process)//GO:0042732(D-xylose metabolic process)//GO:0005997(xylulose metabolic process)//GO:0005998(xylulose catabolic process)//GO:0005975(carbohydrate metabolic process)//GO:0006091(generation of precursor metabolites and energy)//GO:0046835(carbohydrate phosphorylation)
CDC6	ENSG00000094804	protein_coding	+	chr17:38443884-38459171	4.46932	0.489305	3.6724	3.19125	0.00045	0.00106569	up	990	CDC18L|HsCDC18|HsCDC6	MIM:602627|HGNC:HGNC:1744|HPRD:04022	17	17q21.3	cell division cycle 6	hsa04110(Cell cycle)	GO:0005794(Golgi apparatus)//GO:0051233(spindle midzone)//GO:0005829(cytosol)//GO:0005654(nucleoplasm)//GO:0005634(nucleus)//GO:0005737(cytoplasm)//GO:0000922(spindle pole)	GO:0005524(ATP binding)//GO:0000166(nucleotide binding)//GO:0019900(kinase binding)//GO:0005515(protein binding)	GO:1904385(cellular response to angiotensin)//GO:0045737(positive regulation of cyclin-dependent protein serine/threonine kinase activity)//GO:0007067(mitotic nuclear division)//GO:0000083(regulation of transcription involved in G1/S transition of mitotic cell cycle)//GO:0048146(positive regulation of fibroblast proliferation)//GO:0032467(positive regulation of cytokinesis)//GO:1904117(cellular r…
CDC23	ENSG00000094880	protein_coding	-	chr5:137475454-137549032	9.53096	4.70734	1.84516	1.01771	5e-05	0.000136014	up	8697	ANAPC8|APC8|CUT23	MIM:603462|HGNC:HGNC:1724|Ensembl:ENSG00000094880|HPRD:07221|Vega:OTTHUMG00000129198	5	5q31	cell division cycle 23	hsa04110(Cell cycle)//hsa04114(Oocyte meiosis)//hsa04120(Ubiquitin mediated proteolysis)//hsa04914(Progesterone-mediated oocyte maturation)//hsa05166(HTLV-I infection)	GO:0005622(intracellular)//GO:0005829(cytosol)//GO:0005680(anaphase-promoting complex)//GO:0005654(nucleoplasm)	GO:0004842(ubiquitin-protein transferase activity)//GO:0005515(protein binding)	GO:0007080(mitotic metaphase plate congression)//GO:0030071(regulation of mitotic metaphase/anaphase transition)//GO:0070979(protein K11-linked ubiquitination)//GO:0007067(mitotic nuclear division)//GO:0051437(positive regulation of ubiquitin-protein ligase activity involved in regulation of mitotic cell cycle transition)//GO:0007091(metaphase/anaphase transition of mitotic cell cycle)//GO:005143…
MSH2	ENSG00000095002	protein_coding	+	chr2:47630107-47798078	14.9593	5.86843	2.32357	1.35	5e-05	0.000136014	up	4436	COCA1|FCC1|HNPCC|HNPCC1|LCFS2	MIM:609309|HGNC:HGNC:7325|Ensembl:ENSG00000095002|HPRD:00389|Vega:OTTHUMG00000128861	2	2p21	mutS homolog 2	hsa03430(Mismatch repair)//hsa05200(Pathways in cancer)//hsa05210(Colorectal cancer)	GO:0016020(membrane)//GO:0000784(nuclear chromosome, telomeric region)//GO:0032302(MutSbeta complex)//GO:0005654(nucleoplasm)//GO:0032301(MutSalpha complex)//GO:0032300(mismatch repair complex)	GO:0043531(ADP binding)//GO:0000400(four-way junction DNA binding)//GO:0032405(MutLalpha complex binding)//GO:0032357(oxidized purine DNA binding)//GO:0000287(magnesium ion binding)//GO:0032137(guanine/thymine mispair binding)//GO:0000406(double-strand/single-strand DNA junction binding)//GO:0032181(dinucleotide repeat insertion binding)//GO:0016887(ATPase activity)//GO:0032142(single guanine ins…	GO:0008584(male gonad development)//GO:0006281(DNA repair)//GO:0045128(negative regulation of reciprocal meiotic recombination)//GO:0006119(oxidative phosphorylation)//GO:0043570(maintenance of DNA repeat elements)//GO:0016446(somatic hypermutation of immunoglobulin genes)//GO:0007050(cell cycle arrest)//GO:0045190(isotype switching)//GO:0001701(in utero embryonic development)//GO:0006302(double-…
DHPS	ENSG00000095059	protein_coding	-	chr19:12754020-12792716	36.3123	16.4824	2.13428	1.13953	5e-05	0.000136014	up	1725	DHS|DS|MIG13	MIM:600944|HGNC:HGNC:2869|Ensembl:ENSG00000095059|HPRD:02969|Vega:OTTHUMG00000182618	19	19p13.2	deoxyhypusine synthase		GO:0005829(cytosol)	GO:0034038(deoxyhypusine synthase activity)//GO:0005515(protein binding)	GO:0008284(positive regulation of cell proliferation)//GO:0008612(peptidyl-lysine modification to peptidyl-hypusine)//GO:0042102(positive regulation of T cell proliferation)//GO:0050983(deoxyhypusine biosynthetic process from spermidine)//GO:0042593(glucose homeostasis)//GO:0044267(cellular protein metabolic process)//GO:0006412(translation)//GO:0043687(post-translational protein modification)//G…
EPB41L4B	ENSG00000095203	protein_coding	-	chr9:111934254-112083244	2.05157	0.909529	1.59807	1.17353	5e-05	0.000136014	up	54566	CG1|EHM2	MIM:610340|HGNC:HGNC:19818|Ensembl:ENSG00000095203|HPRD:09940|Vega:OTTHUMG00000020470	9	9q31-q32	erythrocyte membrane protein band 4.1 like 4B		GO:0005923(bicellular tight junction)//GO:0019898(extrinsic component of membrane)//GO:0045177(apical part of cell)//GO:0005856(cytoskeleton)//GO:0005737(cytoplasm)	GO:0008092(cytoskeletal protein binding)//GO:0005200(structural constituent of cytoskeleton)	GO:0010837(regulation of keratinocyte proliferation)//GO:0051549(positive regulation of keratinocyte migration)//GO:0031032(actomyosin structure organization)//GO:0010628(positive regulation of gene expression)//GO:0042060(wound healing)//GO:0045785(positive regulation of cell adhesion)
CRAT	ENSG00000095321	protein_coding	-	chr9:131857088-131911225	27.1632	11.1469	2.31855	1.28501	5e-05	0.000136014	up	1384	CAT1	MIM:600184|HGNC:HGNC:2342|Ensembl:ENSG00000095321|HPRD:08971|Vega:OTTHUMG00000147343	9	9q34.1	carnitine O-acetyltransferase	hsa04146(Peroxisome)	GO:0005783(endoplasmic reticulum)//GO:0005743(mitochondrial inner membrane)//GO:0005739(mitochondrion)//GO:0005777(peroxisome)//GO:0005782(peroxisomal matrix)	GO:0005102(receptor binding)//GO:0004092(carnitine O-acetyltransferase activity)//GO:0016746(transferase activity, transferring acyl groups)	GO:0044255(cellular lipid metabolic process)//GO:0008152(metabolic process)//GO:0044281(small molecule metabolic process)//GO:0019254(carnitine metabolic process, CoA-linked)//GO:0006810(transport)//GO:0033540(fatty acid beta-oxidation using acyl-CoA oxidase)
CRTAC1	ENSG00000095713	protein_coding	-	chr10:99609995-99790585	349.762	32.2751	10.5413	3.43788	5e-05	0.000136014	up	55118	ASPIC|ASPIC1|CEP-68	MIM:606276|HGNC:HGNC:14882|Ensembl:ENSG00000095713|HPRD:10447|Vega:OTTHUMG00000018871	10	10q22	cartilage acidic protein 1		GO:0005578(proteinaceous extracellular matrix)//GO:0070062(extracellular exosome)//GO:0030426(growth cone)	GO:0005515(protein binding)//GO:0005509(calcium ion binding)	GO:0021772(olfactory bulb development)//GO:0007413(axonal fasciculation)//GO:1900121(negative regulation of receptor binding)
NUBP2	ENSG00000095906	protein_coding	+	chr16:1823207-1844972	11.4781	4.69187	2.19227	1.29065	5e-05	0.000136014	up	10101	CFD1|NBP 2|NUBP1	MIM:610779|HGNC:HGNC:8042|Ensembl:ENSG00000095906|HPRD:14846|Vega:OTTHUMG00000128639	16	16p13.3	nucleotide binding protein 2		GO:0005634(nucleus)//GO:0005814(centriole)//GO:0005929(cilium)//GO:0031616(spindle pole centrosome)	GO:0005524(ATP binding)//GO:0000166(nucleotide binding)//GO:0051539(4 iron, 4 sulfur cluster binding)//GO:0046872(metal ion binding)//GO:0005515(protein binding)	GO:0044281(small molecule metabolic process)//GO:0016226(iron-sulfur cluster assembly)//GO:0030030(cell projection organization)
FKBP5	ENSG00000096060	protein_coding	-	chr6:35541361-35704724	75.2858	36.0915	2.05669	1.06072	5e-05	0.000136014	up	2289	AIG6|FKBP51|FKBP54|P54|PPIase|Ptg-10	MIM:602623|HGNC:HGNC:3721|Ensembl:ENSG00000096060|HPRD:04019|Vega:OTTHUMG00000014576	6	6p21.31	FK506 binding protein 5	hsa04915(Estrogen signaling pathway)	GO:0005654(nucleoplasm)//GO:0070062(extracellular exosome)//GO:0005789(endoplasmic reticulum membrane)//GO:0016020(membrane)	GO:0005528(FK506 binding)//GO:0003755(peptidyl-prolyl cis-trans isomerase activity)//GO:0005515(protein binding)//GO:0031072(heat shock protein binding)	GO:0061077(chaperone-mediated protein folding)//GO:0000413(protein peptidyl-prolyl isomerization)//GO:0006457(protein folding)
TMEM14A	ENSG00000096092	protein_coding	+	chr6:52535906-52551386	4.37393	2.08956	1.73938	1.06573	0.0005	0.00117341	up	28978	C6orf73|PTD011	HGNC:HGNC:21076|Ensembl:ENSG00000096092|HPRD:15522|Vega:OTTHUMG00000014856	6	6p12.2	transmembrane protein 14A		GO:0016021(integral component of membrane)	GO:0005515(protein binding)
DSP	ENSG00000096696	protein_coding	+	chr6:7541807-7586950	6.01456	2.78985	1.85088	1.10827	5e-05	0.000136014	up	1832	DCWHKTA|DP	MIM:125647|HGNC:HGNC:3052|Ensembl:ENSG00000096696|HPRD:00513|Vega:OTTHUMG00000014212	6	6p24	desmoplakin	hsa05412(Arrhythmogenic right ventricular cardiomyopathy (ARVC))	GO:0001533(cornified envelope)//GO:0005916(fascia adherens)//GO:0005886(plasma membrane)//GO:0070062(extracellular exosome)//GO:0014704(intercalated disc)//GO:0030057(desmosome)//GO:0016323(basolateral plasma membrane)//GO:0005882(intermediate filament)//GO:0005634(nucleus)//GO:0005737(cytoplasm)	GO:0005080(protein kinase C binding)//GO:0005200(structural constituent of cytoskeleton)//GO:0005198(structural molecule activity)//GO:0030674(protein binding, bridging)//GO:0086083(cell adhesive protein binding involved in bundle of His cell-Purkinje myocyte communication)//GO:0097110(scaffold protein binding)//GO:0044822(poly(A) RNA binding)//GO:0050839(cell adhesion molecule binding)//GO:00055…	GO:0006921(cellular component disassembly involved in execution phase of apoptosis)//GO:0071896(protein localization to adherens junction)//GO:0018149(peptide cross-linking)//GO:0045109(intermediate filament organization)//GO:0098911(regulation of ventricular cardiac muscle cell action potential)//GO:0030216(keratinocyte differentiation)//GO:0012501(programmed cell death)//GO:0003223(ventricular …
SYDE2	ENSG00000097096	protein_coding	-	chr1:85622555-85666729	7.15081	2.08048	2.64595	1.78119	5e-05	0.000136014	up	84144	-	HGNC:HGNC:25841|Ensembl:ENSG00000097096|Vega:OTTHUMG00000009956	1	1p22.3	synapse defective 1, Rho GTPase, homolog 2 (C. elegans)		GO:0005737(cytoplasm)//GO:0005829(cytosol)	GO:0005096(GTPase activator activity)	GO:0090630(activation of GTPase activity)//GO:0051056(regulation of small GTPase mediated signal transduction)//GO:0007264(small GTPase mediated signal transduction)//GO:0043087(regulation of GTPase activity)
SCD	ENSG00000099194	protein_coding	+	chr10:102106880-102124591	34.588	12.3643	2.66292	1.48409	5e-05	0.000136014	up	6319	FADS5|MSTP008|SCD1|SCDOS|hSCD1	MIM:604031|HGNC:HGNC:10571|Ensembl:ENSG00000099194|HPRD:04941|Vega:OTTHUMG00000018906	10	10q24.31	stearoyl-CoA desaturase (delta-9-desaturase)	hsa01040(Biosynthesis of unsaturated fatty acids)//	GO:0005783(endoplasmic reticulum)//GO:0016020(membrane)//GO:0016021(integral component of membrane)//GO:0005789(endoplasmic reticulum membrane)	GO:0005506(iron ion binding)//GO:0016491(oxidoreductase activity)//GO:0004768(stearoyl-CoA 9-desaturase activity)	GO:0044255(cellular lipid metabolic process)//GO:0055114(oxidation-reduction process)//GO:0044281(small molecule metabolic process)//GO:0035338(long-chain fatty-acyl-CoA biosynthetic process)//GO:0019432(triglyceride biosynthetic process)//GO:0006636(unsaturated fatty acid biosynthetic process)
FAM21A	ENSG00000099290	protein_coding	+	chr10:51827647-51893269	6.03638	2.44909	2.04007	1.30144	5e-05	0.000136014	up	387680	FAM21B|bA56A21.1|bA98I6.1	HGNC:HGNC:23416|Ensembl:ENSG00000099290|HPRD:17364|Vega:OTTHUMG00000018225	10	10q11.23	family with sequence similarity 21 member A	hsa04144(Endocytosis)	GO:0005886(plasma membrane)//GO:0031901(early endosome membrane)//GO:0043231(intracellular membrane-bounded organelle)//GO:0071203(WASH complex)//GO:0005730(nucleolus)//GO:0005769(early endosome)//GO:0005737(cytoplasm)	GO:0008289(lipid binding)	GO:0042147(retrograde transport, endosome to Golgi)//GO:0015031(protein transport)
OCEL1	ENSG00000099330	protein_coding	+	chr19:17337012-17340028	13.3723	6.32438	1.96225	1.08025	5e-05	0.000136014	up	79629	FWP009|S863-9	HGNC:HGNC:26221|Ensembl:ENSG00000099330|HPRD:08004|Vega:OTTHUMG00000182726	19	19p13.11	occludin/ELL domain containing 1		GO:0016021(integral component of membrane)
HSD3B7	ENSG00000099377	protein_coding	+	chr16:30996518-31000473	11.7699	2.95253	3.23082	1.99508	5e-05	0.000136014	up	80270	CBAS1|PFIC4|SDR11E3	MIM:607764|HGNC:HGNC:18324|Ensembl:ENSG00000099377|HPRD:09680|Vega:OTTHUMG00000132417	16	16p11.2	hydroxy-delta-5-steroid dehydrogenase, 3 beta- and steroid delta-isomerase 7	hsa00120(Primary bile acid biosynthesis)//	GO:0016021(integral component of membrane)//GO:0005575(cellular_component)//GO:0005789(endoplasmic reticulum membrane)	GO:0047016(cholest-5-ene-3-beta,7-alpha-diol 3-beta-dehydrogenase activity)//GO:0005515(protein binding)//GO:0003854(3-beta-hydroxy-delta5-steroid dehydrogenase activity)	GO:0055114(oxidation-reduction process)//GO:0006699(bile acid biosynthetic process)//GO:0006694(steroid biosynthetic process)//GO:0044281(small molecule metabolic process)//GO:0008206(bile acid metabolic process)
SETD1A	ENSG00000099381	protein_coding	+	chr16:30968614-30996437	11.4288	4.22878	2.377	1.43437	5e-05	0.000136014	up	9739	KMT2F|Set1|Set1A	MIM:611052|HGNC:HGNC:29010|Ensembl:ENSG00000099381|HPRD:13795|Vega:OTTHUMG00000150474	16	16p11.2	SET domain containing 1A	hsa00310(Lysine degradation)	GO:0035097(histone methyltransferase complex)//GO:0005694(chromosome)//GO:0016607(nuclear speck)//GO:0048188(Set1C/COMPASS complex)//GO:0005654(nucleoplasm)//GO:0005634(nucleus)	GO:0003676(nucleic acid binding)//GO:0042800(histone methyltransferase activity (H3-K4 specific))//GO:0008013(beta-catenin binding)//GO:0003723(RNA binding)//GO:0000166(nucleotide binding)//GO:0005515(protein binding)	GO:0006325(chromatin organization)//GO:0006351(transcription, DNA-templated)//GO:0006355(regulation of transcription, DNA-templated)//GO:0051568(histone H3-K4 methylation)
RASSF7	ENSG00000099849	protein_coding	+	chr11:537526-564021	2.63407	0.556859	2.33423	2.24191	0.00015	0.000384245	up	8045	C11orf13|HRAS1|HRC1	MIM:143023|HGNC:HGNC:1166|Ensembl:ENSG00000099849|HPRD:00878|Vega:OTTHUMG00000132004	11	11p15.5	Ras association domain family member 7		GO:0005815(microtubule organizing center)//GO:0005737(cytoplasm)	GO:0005515(protein binding)	GO:0006915(apoptotic process)//GO:0007165(signal transduction)
MADCAM1	ENSG00000099866	protein_coding	+	chr19:489175-519654	1.35837	0	2.35837	inf	0.01465	0.0254457	up	8174	MACAM1	MIM:102670|HGNC:HGNC:6765|Ensembl:ENSG00000099866|HPRD:00035|Vega:OTTHUMG00000180548	19	19p13.3	mucosal vascular addressin cell adhesion molecule 1	hsa04514(Cell adhesion molecules (CAMs))//hsa04672(Intestinal immune network for IgA production)	GO:0016020(membrane)//GO:0005886(plasma membrane)//GO:0016021(integral component of membrane)	GO:0098640(integrin binding involved in cell-matrix adhesion)	GO:0007568(aging)//GO:0043113(receptor clustering)//GO:0030198(extracellular matrix organization)//GO:0030216(keratinocyte differentiation)//GO:0007155(cell adhesion)//GO:0002687(positive regulation of leukocyte migration)//GO:0034113(heterotypic cell-cell adhesion)//GO:0050776(regulation of immune response)//GO:0050901(leukocyte tethering or rolling)//GO:0007229(integrin-mediated signaling pathw…
P2RX6	ENSG00000099957	protein_coding	+	chr22:21353392-21399306	5.36918	0.36294	4.67312	3.8869	5e-05	0.000136014	up	9127	P2RXL1|P2X6|P2XM	MIM:608077|HGNC:HGNC:8538|HPRD:08490	22	22q11.21	purinergic receptor P2X 6	hsa04020(Calcium signaling pathway)//hsa04080(Neuroactive ligand-receptor interaction)	GO:0005887(integral component of plasma membrane)//GO:0005639(integral component of nuclear inner membrane)//GO:0014069(postsynaptic density)//GO:0030054(cell junction)//GO:0043197(dendritic spine)//GO:0005737(cytoplasm)//GO:0043025(neuronal cell body)	GO:0001614(purinergic nucleotide receptor activity)//GO:0005524(ATP binding)//GO:0004931(extracellular ATP-gated cation channel activity)//GO:0042802(identical protein binding)//GO:0004888(transmembrane signaling receptor activity)//GO:0015267(channel activity)	GO:0051260(protein homooligomerization)//GO:0033198(response to ATP)//GO:0006936(muscle contraction)//GO:0051291(protein heterooligomerization)//GO:0035590(purinergic nucleotide receptor signaling pathway)//GO:0098655(cation transmembrane transport)//GO:0006810(transport)//GO:0007165(signal transduction)
SLC35E4	ENSG00000100036	protein_coding	+	chr22:31031638-31065003	6.63496	2.84729	1.9845	1.2205	5e-05	0.000136014	up	339665	-	HGNC:HGNC:17058|Ensembl:ENSG00000100036|HPRD:15376|Vega:OTTHUMG00000151110	22	22q12.2	solute carrier family 35 member E4		GO:0016021(integral component of membrane)
LRP5L	ENSG00000100068	protein_coding	-	chr22:25747384-25801344	4.8934	1.80582	2.10042	1.43818	0.00135	0.00291642	up	91355	-	HGNC:HGNC:25323|Ensembl:ENSG00000100068|HPRD:13200|Vega:OTTHUMG00000150900	22	22q11.23	LDL receptor related protein 5 like		GO:0005886(plasma membrane)//GO:0043235(receptor complex)	GO:0042813(Wnt-activated receptor activity)//GO:0017147(Wnt-protein binding)	GO:0060070(canonical Wnt signaling pathway)//GO:0044332(Wnt signaling pathway involved in dorsal/ventral axis specification)
ADRBK2	ENSG00000100077	protein_coding	+	chr22:25960815-26125261	4.21773	1.7252	1.91462	1.2897	5e-05	0.000136014	up	157	BARK2|GRK3	MIM:109636|HGNC:HGNC:290|Ensembl:ENSG00000100077|HPRD:00183|Vega:OTTHUMG00000150280	22	22q12.1	adrenergic, beta, receptor kinase 2	hsa04062(Chemokine signaling pathway)//hsa04144(Endocytosis)//hsa04724(Glutamatergic synapse)//hsa04740(Olfactory transduction)//hsa05032(Morphine addiction)		GO:0004672(protein kinase activity)//GO:0004703(G-protein coupled receptor kinase activity)//GO:0047696(beta-adrenergic receptor kinase activity)//GO:0005524(ATP binding)	GO:0006468(protein phosphorylation)//GO:0031623(receptor internalization)//GO:0007165(signal transduction)
SEZ6L	ENSG00000100095	protein_coding	+	chr22:26565439-26779562	6.14884	0.319722	5.41693	4.26543	5e-05	0.000136014	up	23544	-	MIM:607021|HGNC:HGNC:10763|Ensembl:ENSG00000100095|HPRD:08449|Vega:OTTHUMG00000150870	22	22q12.1	seizure related 6 homolog (mouse)-like		GO:0016021(integral component of membrane)//GO:0005789(endoplasmic reticulum membrane)//GO:0043025(neuronal cell body)		GO:0090036(regulation of protein kinase C signaling)//GO:0008344(adult locomotory behavior)//GO:0021680(cerebellar Purkinje cell layer development)//GO:0060074(synapse maturation)
CCDC134	ENSG00000100147	protein_coding	+	chr22:42196682-42222303	3.18874	1.31173	1.81195	1.28151	0.00205	0.00427248	up	79879	-	HGNC:HGNC:26185|Ensembl:ENSG00000100147|HPRD:07988|Vega:OTTHUMG00000151262	22	22q13.2	coiled-coil domain containing 134		GO:0016020(membrane)//GO:0005576(extracellular region)
DEPDC5	ENSG00000100150	protein_coding	+	chr22:32149943-32303020	20.289	8.62309	2.21228	1.23442	5e-05	0.000136014	up	9681	DEP.5|FFEVF	MIM:614191|HGNC:HGNC:18423|Ensembl:ENSG00000100150|HPRD:16795|Vega:OTTHUMG00000030926	22	22q12.3	DEP domain containing 5		GO:0005764(lysosome)//GO:0048471(perinuclear region of cytoplasm)//GO:0005829(cytosol)//GO:0005765(lysosomal membrane)//GO:1990130(Iml1 complex)//GO:0005622(intracellular)	GO:0005096(GTPase activator activity)//GO:0032403(protein complex binding)	GO:0032007(negative regulation of TOR signaling)//GO:0035556(intracellular signal transduction)//GO:0034198(cellular response to amino acid starvation)//GO:0043547(positive regulation of GTPase activity)
KDELR3	ENSG00000100196	protein_coding	+	chr22:38864066-38903665	10.7257	1.1223	5.525	3.25655	0.0215	0.035885	up	11015	ERD2L3	HGNC:HGNC:6306|Ensembl:ENSG00000100196|HPRD:17177|Vega:OTTHUMG00000153520	22	22q13.1	KDEL endoplasmic reticulum protein retention receptor 3	hsa05110(Vibrio cholerae infection)	GO:0016021(integral component of membrane)//GO:0005789(endoplasmic reticulum membrane)	GO:0046923(ER retention sequence binding)	GO:0044267(cellular protein metabolic process)//GO:0030968(endoplasmic reticulum unfolded protein response)//GO:0006621(protein retention in ER lumen)//GO:0016192(vesicle-mediated transport)//GO:0036498(IRE1-mediated unfolded protein response)//GO:0015031(protein transport)
RTCB	ENSG00000100220	protein_coding	-	chr22:32783568-32808274	45.3834	21.861	2.02893	1.0538	5e-05	0.000136014	up	51493	C22orf28|DJ149A16.6|FAAP|HSPC117	MIM:613901|HGNC:HGNC:26935|Ensembl:ENSG00000100220|HPRD:13695|Vega:OTTHUMG00000030300	22	22q12	RNA 2',3'-cyclic phosphate and 5'-OH ligase		GO:0005635(nuclear envelope)//GO:0072669(tRNA-splicing ligase complex)//GO:0005789(endoplasmic reticulum membrane)//GO:0005654(nucleoplasm)//GO:0005634(nucleus)//GO:0005737(cytoplasm)	GO:0005524(ATP binding)//GO:0003972(RNA ligase (ATP) activity)//GO:0017166(vinculin binding)//GO:0044822(poly(A) RNA binding)//GO:0046872(metal ion binding)//GO:0005515(protein binding)	GO:0006388(tRNA splicing, via endonucleolytic cleavage and ligation)//GO:0010467(gene expression)//GO:0001890(placenta development)//GO:0008033(tRNA processing)//GO:0001701(in utero embryonic development)
C22orf31	ENSG00000100249	protein_coding	-	chr22:29454659-29457832	2.01424	0	3.01424	inf	5e-05	0.000136014	up	25770	HS747E2A|bK747E2.1	HGNC:HGNC:26931|Ensembl:ENSG00000100249|HPRD:11031|Vega:OTTHUMG00000151011	22	22q12.1	chromosome 22 open reading frame 31
THOC5	ENSG00000100296	protein_coding	-	chr22:29901867-29977326	32.6611	16.0376	1.97569	1.02612	5e-05	0.000136014	up	8563	C22orf19|Fmip|PK1.3|fSAP79	MIM:612733|HGNC:HGNC:19074|Ensembl:ENSG00000100296|HPRD:16650|Vega:OTTHUMG00000151291	22	22q12.2	THO complex 5	hsa03013(RNA transport)	GO:0000346(transcription export complex)//GO:0000445(THO complex part of transcription export complex)//GO:0000347(THO complex)//GO:0000784(nuclear chromosome, telomeric region)//GO:0005654(nucleoplasm)//GO:0005634(nucleus)//GO:0005737(cytoplasm)	GO:0003723(RNA binding)//GO:0005515(protein binding)	GO:0006406(mRNA export from nucleus)//GO:0008380(RNA splicing)//GO:0046784(viral mRNA export from host cell nucleus)//GO:0032786(positive regulation of DNA-templated transcription, elongation)//GO:0006397(mRNA processing)//GO:2000002(negative regulation of DNA damage checkpoint)//GO:0060215(primitive hemopoiesis)//GO:0030224(monocyte differentiation)
SLC25A17	ENSG00000100372	protein_coding	-	chr22:41165633-41215403	12.167	4.14088	2.56123	1.55496	5e-05	0.000136014	up	10478	PMP34	MIM:606795|HGNC:HGNC:10987|Ensembl:ENSG00000100372|HPRD:08425|Vega:OTTHUMG00000151139	22	22q13.2	solute carrier family 25 member 17	hsa04146(Peroxisome)	GO:0005743(mitochondrial inner membrane)//GO:0016020(membrane)//GO:0016021(integral component of membrane)//GO:0005777(peroxisome)//GO:0005779(integral component of peroxisomal membrane)//GO:0043231(intracellular membrane-bounded organelle)//GO:0005739(mitochondrion)//GO:0005778(peroxisomal membrane)	GO:0015217(ADP transmembrane transporter activity)//GO:0003735(structural constituent of ribosome)//GO:0005347(ATP transmembrane transporter activity)//GO:0051724(NAD transporter activity)//GO:0015230(FAD transmembrane transporter activity)//GO:0005215(transporter activity)//GO:0015228(coenzyme A transmembrane transporter activity)//GO:0051087(chaperone binding)//GO:0080122(AMP transmembrane tran…	GO:0044255(cellular lipid metabolic process)//GO:0006635(fatty acid beta-oxidation)//GO:0015866(ADP transport)//GO:0080121(AMP transport)//GO:0035349(coenzyme A transmembrane transport)//GO:0043132(NAD transport)//GO:0044281(small molecule metabolic process)//GO:0006412(translation)//GO:0015867(ATP transport)//GO:1901679(nucleotide transmembrane transport)//GO:0001561(fatty acid alpha-oxidation)/…
KCTD17	ENSG00000100379	protein_coding	+	chr22:37447778-37459430	7.51508	2.87904	2.19515	1.3842	5e-05	0.000136014	up	79734	-	MIM:616386|HGNC:HGNC:25705|Ensembl:ENSG00000100379|HPRD:07764|Vega:OTTHUMG00000150532	22	22q12.3	potassium channel tetramerization domain containing 17		GO:0005783(endoplasmic reticulum)//GO:0031463(Cul3-RING ubiquitin ligase complex)//GO:0005737(cytoplasm)	GO:0005515(protein binding)//GO:0042802(identical protein binding)//GO:0097602(cullin family protein binding)	GO:0032469(endoplasmic reticulum calcium ion homeostasis)//GO:0043161(proteasome-mediated ubiquitin-dependent protein catabolic process)//GO:0051260(protein homooligomerization)//GO:0045724(positive regulation of cilium assembly)//GO:0030030(cell projection organization)
PMM1	ENSG00000100417	protein_coding	-	chr22:41956766-41985894	12.1746	3.98784	2.64134	1.61019	5e-05	0.000136014	up	5372	Sec53	MIM:601786|HGNC:HGNC:9114|Ensembl:ENSG00000100417|HPRD:03473|Vega:OTTHUMG00000150972	22	22q13.2	phosphomannomutase 1	hsa00051(Fructose and mannose metabolism)//hsa00520(Amino sugar and nucleotide sugar metabolism)//	GO:0043025(neuronal cell body)//GO:0005737(cytoplasm)//GO:0005829(cytosol)	GO:0046872(metal ion binding)//GO:0005515(protein binding)//GO:0004615(phosphomannomutase activity)	GO:0044267(cellular protein metabolic process)//GO:0006488(dolichol-linked oligosaccharide biosynthetic process)//GO:0006013(mannose metabolic process)//GO:0043687(post-translational protein modification)//GO:0018279(protein N-linked glycosylation via asparagine)//GO:0009298(GDP-mannose biosynthetic process)
FKBP3	ENSG00000100442	protein_coding	-	chr14:45553301-45604522	13.6458	4.23446	2.79796	1.68821	5e-05	0.000136014	up	2287	FKBP-25|FKBP-3|FKBP25|PPIase	MIM:186947|HGNC:HGNC:3719|Ensembl:ENSG00000100442|HPRD:01743	14	14q21.2	FK506 binding protein 3		GO:0005634(nucleus)//GO:0005789(endoplasmic reticulum membrane)	GO:0004872(receptor activity)//GO:0005528(FK506 binding)//GO:0003755(peptidyl-prolyl cis-trans isomerase activity)//GO:0005515(protein binding)//GO:0044822(poly(A) RNA binding)	GO:0061077(chaperone-mediated protein folding)//GO:0000413(protein peptidyl-prolyl isomerization)
SDR39U1	ENSG00000100445	protein_coding	-	chr14:24895737-24912111	31.5945	15.282	2.00187	1.04784	5e-05	0.000136014	up	56948	C14orf124|HCDI	MIM:616162|HGNC:HGNC:20275|Ensembl:ENSG00000100445|HPRD:16598|Vega:OTTHUMG00000171316	14	14q12	short chain dehydrogenase/reductase family 39U member 1		GO:0005634(nucleus)	GO:0016491(oxidoreductase activity)	GO:0055114(oxidation-reduction process)
POLE2	ENSG00000100479	protein_coding	-	chr14:50110272-50155140	3.00916	0.886956	2.12467	1.76243	0.0014	0.00301482	up	5427	DPE2	MIM:602670|HGNC:HGNC:9178|Ensembl:ENSG00000100479|HPRD:16007|Vega:OTTHUMG00000170813	14	14q21-q22	polymerase (DNA directed), epsilon 2, accessory subunit	hsa00230(Purine metabolism)//hsa00240(Pyrimidine metabolism)//	GO:0005654(nucleoplasm)//GO:0043231(intracellular membrane-bounded organelle)//GO:0008622(epsilon DNA polymerase complex)	GO:0003887(DNA-directed DNA polymerase activity)//GO:0005515(protein binding)//GO:0003677(DNA binding)	GO:0000723(telomere maintenance)//GO:0042276(error-prone translesion synthesis)//GO:0000082(G1/S transition of mitotic cell cycle)//GO:0000278(mitotic cell cycle)//GO:0032201(telomere maintenance via semi-conservative replication)//GO:0006261(DNA-dependent DNA replication)//GO:0000722(telomere maintenance via recombination)//GO:0006260(DNA replication)//GO:0006270(DNA replication initiation)//GO:…
VCPKMT	ENSG00000100483	protein_coding	-	chr14:50575349-50583318	5.29748	2.2096	1.96208	1.26152	5e-05	0.000136014	up	79609	C14orf138|METTL21D|VCP-KMT	MIM:615260|HGNC:HGNC:20352|Ensembl:ENSG00000100483|HPRD:16605|Vega:OTTHUMG00000029531	14	14q21.3	valosin containing protein lysine methyltransferase		GO:0005575(cellular_component)//GO:0005737(cytoplasm)	GO:0016279(protein-lysine N-methyltransferase activity)//GO:0005515(protein binding)	GO:0018023(peptidyl-lysine trimethylation)
CDKL1	ENSG00000100490	protein_coding	-	chr14:50704280-50883179	28.401	11.7503	2.30591	1.27324	5e-05	0.000136014	up	8814	KKIALRE|P42	MIM:603441|HGNC:HGNC:1781|Ensembl:ENSG00000100490|HPRD:10348|Vega:OTTHUMG00000140290	14	14q21.3	cyclin dependent kinase like 1		GO:0005634(nucleus)//GO:0005737(cytoplasm)//GO:0070062(extracellular exosome)	GO:0004672(protein kinase activity)//GO:0005524(ATP binding)//GO:0004693(cyclin-dependent protein serine/threonine kinase activity)	GO:0006468(protein phosphorylation)//GO:0007507(heart development)//GO:0051726(regulation of cell cycle)
GNPNAT1	ENSG00000100522	protein_coding	-	chr14:53241911-53258386	10.7346	2.42416	3.427	2.14671	5e-05	0.000136014	up	64841	GNA1|GNPNAT|Gpnat1	MIM:616510|HGNC:HGNC:19980|Ensembl:ENSG00000100522|HPRD:17046|Vega:OTTHUMG00000152334	14	14q22.1	glucosamine-phosphate N-acetyltransferase 1	hsa00520(Amino sugar and nucleotide sugar metabolism)	GO:0010008(endosome membrane)//GO:0005793(endoplasmic reticulum-Golgi intermediate compartment)//GO:0005829(cytosol)//GO:0000139(Golgi membrane)//GO:0005770(late endosome)	GO:0048029(monosaccharide binding)//GO:0004343(glucosamine 6-phosphate N-acetyltransferase activity)//GO:0042802(identical protein binding)//GO:0008080(N-acetyltransferase activity)	GO:0044267(cellular protein metabolic process)//GO:0008152(metabolic process)//GO:0006044(N-acetylglucosamine metabolic process)//GO:0006488(dolichol-linked oligosaccharide biosynthetic process)//GO:0001889(liver development)//GO:0006041(glucosamine metabolic process)//GO:0043687(post-translational protein modification)//GO:0006048(UDP-N-acetylglucosamine biosynthetic process)//GO:0018279(protein…
DDHD1	ENSG00000100523	protein_coding	-	chr14:53510685-53620000	16.74	6.5681	2.34405	1.34975	5e-05	0.000136014	up	80821	PA-PLA1|PAPLA1|SPG28	MIM:614603|HGNC:HGNC:19714|Ensembl:ENSG00000100523|HPRD:07482|Vega:OTTHUMG00000140305	14	14q21	DDHD domain containing 1		GO:0005829(cytosol)	GO:0046872(metal ion binding)//GO:0016787(hydrolase activity)	GO:0006644(phospholipid metabolic process)//GO:0044281(small molecule metabolic process)//GO:0006654(phosphatidic acid biosynthetic process)//GO:0016042(lipid catabolic process)//GO:0046474(glycerophospholipid biosynthetic process)//GO:0030382(sperm mitochondrion organization)//GO:0090141(positive regulation of mitochondrial fission)
PLEK2	ENSG00000100558	protein_coding	-	chr14:67853699-67878917	2.34962	0	3.34962	inf	5e-05	0.000136014	up	26499	-	MIM:608007|HGNC:HGNC:19238|Ensembl:ENSG00000100558|HPRD:12151|Vega:OTTHUMG00000171247	14	14q23.3	pleckstrin 2		GO:0005622(intracellular)//GO:0031258(lamellipodium membrane)//GO:0005856(cytoskeleton)//GO:0005737(cytoplasm)		GO:0030036(actin cytoskeleton organization)//GO:0035556(intracellular signal transduction)
SPTLC2	ENSG00000100596	protein_coding	-	chr14:77972339-78083116	20.9133	8.33694	2.34695	1.32683	5e-05	0.000136014	up	9517	HSN1C|LCB2|LCB2A|NSAN1C|SPT2|hLCB2a	MIM:605713|HGNC:HGNC:11278|Ensembl:ENSG00000100596|HPRD:05755|Vega:OTTHUMG00000171540	14	14q24.3	serine palmitoyltransferase long chain base subunit 2	hsa00600(Sphingolipid metabolism)//	GO:0017059(serine C-palmitoyltransferase complex)//GO:0016021(integral component of membrane)//GO:0005739(mitochondrion)//GO:0005789(endoplasmic reticulum membrane)	GO:0030170(pyridoxal phosphate binding)//GO:0004758(serine C-palmitoyltransferase activity)//GO:0016740(transferase activity)	GO:1904504(positive regulation of lipophagy)//GO:0030148(sphingolipid biosynthetic process)//GO:0044281(small molecule metabolic process)//GO:0046512(sphingosine biosynthetic process)//GO:0006686(sphingomyelin biosynthetic process)//GO:0009058(biosynthetic process)//GO:0006665(sphingolipid metabolic process)//GO:0046513(ceramide biosynthetic process)//GO:0046511(sphinganine biosynthetic process)
SIX4	ENSG00000100625	protein_coding	-	chr14:61176245-61191066	3.79117	1.76285	1.73414	1.10474	5e-05	0.000136014	up	51804	AREC3	MIM:606342|HGNC:HGNC:10890|Ensembl:ENSG00000100625|HPRD:06960|Vega:OTTHUMG00000028996	14	14q23	SIX homeobox 4	hsa05202(Transcriptional misregulation in cancer)	GO:0005634(nucleus)//GO:0005737(cytoplasm)	GO:0001077(transcriptional activator activity, RNA polymerase II core promoter proximal region sequence-specific binding)//GO:0043565(sequence-specific DNA binding)//GO:0000978(RNA polymerase II core promoter proximal region sequence-specific DNA binding)	GO:0046661(male sex differentiation)//GO:0060037(pharyngeal system development)//GO:0051451(myoblast migration)//GO:0008584(male gonad development)//GO:0009653(anatomical structure morphogenesis)//GO:0043066(negative regulation of apoptotic process)//GO:0098528(skeletal muscle fiber differentiation)//GO:1902725(negative regulation of satellite cell differentiation)//GO:0007519(skeletal muscle tis…
CEP128	ENSG00000100629	protein_coding	-	chr14:80943329-81638207	13.4252	6.57019	1.90553	1.03094	5e-05	0.000136014	up	145508	C14orf145|C14orf61|LEDP/132	HGNC:HGNC:20359|Ensembl:ENSG00000100629|HPRD:09834|Vega:OTTHUMG00000171442	14	14q31.1	centrosomal protein 128kDa		GO:0005815(microtubule organizing center)//GO:0005814(centriole)//GO:0005737(cytoplasm)//GO:0000922(spindle pole)
SLC8A3	ENSG00000100678	protein_coding	-	chr14:70510933-70696904	1.23651	0.286759	1.7381	2.10836	5e-05	0.000136014	up	6547	NCX3	MIM:607991|HGNC:HGNC:11070|Ensembl:ENSG00000100678|HPRD:09723|Vega:OTTHUMG00000152342	14	14q24.1	solute carrier family 8 member A3	hsa04020(Calcium signaling pathway)//hsa04022(cGMP-PKG signaling pathway)//hsa04740(Olfactory transduction)//hsa04974(Protein digestion and absorption)	GO:0005886(plasma membrane)//GO:0005887(integral component of plasma membrane)//GO:0005874(microtubule)//GO:0043204(perikaryon)//GO:0048471(perinuclear region of cytoplasm)//GO:0005789(endoplasmic reticulum membrane)//GO:0016021(integral component of membrane)//GO:0031226(intrinsic component of plasma membrane)//GO:0030054(cell junction)//GO:0005741(mitochondrial outer membrane)//GO:0031594(neuro…	GO:0005432(calcium:sodium antiporter activity)//GO:0005516(calmodulin binding)//GO:0046872(metal ion binding)	GO:1990034(calcium ion export from cell)//GO:0071320(cellular response to cAMP)//GO:0048709(oligodendrocyte differentiation)//GO:0042552(myelination)//GO:0007613(memory)//GO:0060291(long-term synaptic potentiation)//GO:0007154(cell communication)//GO:0002244(hematopoietic progenitor cell differentiation)//GO:0006816(calcium ion transport)//GO:0055085(transmembrane transport)//GO:0070588(calcium i…
PAPLN	ENSG00000100767	protein_coding	+	chr14:73704204-73741348	12.1194	4.75232	2.28071	1.35062	5e-05	0.000136014	up	89932	-	HGNC:HGNC:19262|Ensembl:ENSG00000100767|HPRD:15099|Vega:OTTHUMG00000171366	14	14q24.2	papilin, proteoglycan-like sulfated glycoprotein		GO:0005578(proteinaceous extracellular matrix)//GO:0005604(basement membrane)	GO:0008270(zinc ion binding)//GO:0004222(metalloendopeptidase activity)//GO:0004867(serine-type endopeptidase inhibitor activity)	GO:0006508(proteolysis)//GO:0010951(negative regulation of endopeptidase activity)
PCK2	ENSG00000100889	protein_coding	+	chr14:24549315-24602058	11.4217	4.1658	2.4046	1.45511	5e-05	0.000136014	up	5106	PEPCK|PEPCK-M|PEPCK2	MIM:614095|HGNC:HGNC:8725|Ensembl:ENSG00000100889|HPRD:02026|Vega:OTTHUMG00000028791	14	14q11.2	phosphoenolpyruvate carboxykinase 2 (mitochondrial)	hsa00010(Glycolysis / Gluconeogenesis)//hsa00020(Citrate cycle (TCA cycle))//hsa00620(Pyruvate metabolism)//	GO:0005739(mitochondrion)//GO:0005759(mitochondrial matrix)//GO:0070062(extracellular exosome)	GO:0004613(phosphoenolpyruvate carboxykinase (GTP) activity)//GO:0004611(phosphoenolpyruvate carboxykinase activity)//GO:0016301(kinase activity)//GO:0005525(GTP binding)//GO:0046872(metal ion binding)//GO:0005515(protein binding)	GO:0016310(phosphorylation)//GO:0006094(gluconeogenesis)//GO:0005975(carbohydrate metabolic process)//GO:0044281(small molecule metabolic process)//GO:0006006(glucose metabolic process)
SEC23A	ENSG00000100934	protein_coding	-	chr14:39501122-39578850	82.8196	38.2595	2.13501	1.11416	5e-05	0.000136014	up	10484	CLSD	MIM:610511|HGNC:HGNC:10701|Ensembl:ENSG00000100934|HPRD:06714|Vega:OTTHUMG00000028812	14	14q21.1	Sec23 homolog A, COPII coat complex component	hsa04141(Protein processing in endoplasmic reticulum)	GO:0030868(smooth endoplasmic reticulum membrane)//GO:0048471(perinuclear region of cytoplasm)//GO:0005789(endoplasmic reticulum membrane)//GO:0012507(ER to Golgi transport vesicle membrane)//GO:0005829(cytosol)//GO:0000139(Golgi membrane)//GO:0005783(endoplasmic reticulum)//GO:0030127(COPII vesicle coat)	GO:0008270(zinc ion binding)//GO:0005515(protein binding)	GO:0061024(membrane organization)//GO:0044267(cellular protein metabolic process)//GO:0044281(small molecule metabolic process)//GO:0002474(antigen processing and presentation of peptide antigen via MHC class I)//GO:0048208(COPII vesicle coating)//GO:0016192(vesicle-mediated transport)//GO:0006886(intracellular protein transport)//GO:0043687(post-translational protein modification)//GO:0018279(pr…
NFATC4	ENSG00000100968	protein_coding	+	chr14:24834878-24848810	85.5491	40.5539	2.08282	1.07691	5e-05	0.000136014	up	4776	NF-AT3|NF-ATC4|NFAT3	MIM:602699|HGNC:HGNC:7778|Ensembl:ENSG00000100968|HPRD:09096|Vega:OTTHUMG00000029351	14	14q11.2	nuclear factor of activated T-cells, cytoplasmic, calcineurin-dependent 4	hsa04022(cGMP-PKG signaling pathway)//hsa04310(Wnt signaling pathway)//hsa04360(Axon guidance)//hsa04921(Oxytocin signaling pathway)//hsa05161(Hepatitis B)//hsa05166(HTLV-I infection)	GO:0005667(transcription factor complex)//GO:0005634(nucleus)//GO:0045111(intermediate filament cytoskeleton)//GO:0005737(cytoplasm)//GO:0005829(cytosol)	GO:0042975(peroxisome proliferator activated receptor binding)//GO:0003700(transcription factor activity, sequence-specific DNA binding)//GO:0000978(RNA polymerase II core promoter proximal region sequence-specific DNA binding)//GO:0001078(transcriptional repressor activity, RNA polymerase II core promoter proximal region sequence-specific binding)//GO:0008134(transcription factor binding)//GO:00…	GO:0045333(cellular respiration)//GO:0007507(heart development)//GO:0048167(regulation of synaptic plasticity)//GO:2000297(negative regulation of synapse maturation)//GO:0008630(intrinsic apoptotic signaling pathway in response to DNA damage)//GO:0001569(patterning of blood vessels)//GO:0051145(smooth muscle cell differentiation)//GO:0035562(negative regulation of chromatin binding)//GO:0032760(p…
PROCR	ENSG00000101000	protein_coding	+	chr20:33703159-33872788	63.7812	17.0432	3.59034	1.90393	5e-05	0.000136014	up	10544	CCCA|CCD41|EPCR	MIM:600646|HGNC:HGNC:9452|Ensembl:ENSG00000101000|HPRD:02801|Vega:OTTHUMG00000032323	20	20q11.2	protein C receptor	hsa04610(Complement and coagulation cascades)	GO:0005886(plasma membrane)//GO:0005887(integral component of plasma membrane)//GO:0005576(extracellular region)//GO:0009986(cell surface)//GO:0005813(centrosome)//GO:0070062(extracellular exosome)//GO:0005925(focal adhesion)	GO:0004872(receptor activity)//GO:0005515(protein binding)	GO:0006955(immune response)//GO:0050819(negative regulation of coagulation)//GO:0050900(leukocyte migration)//GO:0007596(blood coagulation)
SGK2	ENSG00000101049	protein_coding	+	chr20:42187607-42216877	2.05399	0.354021	2.2555	2.53652	5e-05	0.000136014	up	10110	H-SGK2|dJ138B7.2	MIM:607589|HGNC:HGNC:13900|Ensembl:ENSG00000101049|HPRD:06348|Vega:OTTHUMG00000033054	20	20q13.2	serum/glucocorticoid regulated kinase 2	hsa04068(FoxO signaling pathway)//hsa04151(PI3K-Akt signaling pathway)	GO:0005622(intracellular)//GO:0005575(cellular_component)//GO:0005829(cytosol)//GO:0005634(nucleus)	GO:0004674(protein serine/threonine kinase activity)//GO:0015459(potassium channel regulator activity)//GO:0004672(protein kinase activity)//GO:0017081(chloride channel regulator activity)//GO:0005246(calcium channel regulator activity)//GO:0005524(ATP binding)//GO:0017080(sodium channel regulator activity)	GO:0006883(cellular sodium ion homeostasis)//GO:0032411(positive regulation of transporter activity)//GO:0006979(response to oxidative stress)//GO:0006468(protein phosphorylation)//GO:0042127(regulation of cell proliferation)//GO:0010765(positive regulation of sodium ion transport)//GO:0001558(regulation of cell growth)//GO:0055085(transmembrane transport)//GO:0035556(intracellular signal transdu…
RAE1	ENSG00000101146	protein_coding	+	chr20:55926065-55954267	14.6471	5.59339	2.37315	1.38882	5e-05	0.000136014	up	8480	MIG14|MRNP41|Mnrp41|dJ481F12.3|dJ800J21.1	MIM:603343|HGNC:HGNC:9828|HPRD:11939	20	20q13.31	ribonucleic acid export 1	hsa03013(RNA transport)//hsa05164(Influenza A)	GO:0005730(nucleolus)//GO:0005634(nucleus)//GO:0005643(nuclear pore)//GO:0005635(nuclear envelope)//GO:0005737(cytoplasm)	GO:0003723(RNA binding)//GO:0008017(microtubule binding)	GO:0044267(cellular protein metabolic process)//GO:0005975(carbohydrate metabolic process)//GO:0015758(glucose transport)//GO:0043687(post-translational protein modification)//GO:0019054(modulation by virus of host process)//GO:0008645(hexose transport)//GO:0008033(tRNA processing)//GO:0031047(gene silencing by RNA)//GO:0019083(viral transcription)//GO:0019048(modulation by virus of host morpholo…
SLC17A9	ENSG00000101194	protein_coding	+	chr20:61584051-61599949	4.77899	0.860265	3.10654	2.47385	5e-05	0.000136014	up	63910	C20orf59|POROK8|VNUT	MIM:612107|HGNC:HGNC:16192|Ensembl:ENSG00000101194|HPRD:12777|Vega:OTTHUMG00000032951	20	20q13.33	solute carrier family 17 member 9		GO:0005623(cell)//GO:0016021(integral component of membrane)	GO:0022857(transmembrane transporter activity)	GO:1903955(positive regulation of protein targeting to mitochondrion)//GO:0055085(transmembrane transport)//GO:0006887(exocytosis)//GO:0006820(anion transport)//GO:1903146(regulation of mitophagy)
TM9SF4	ENSG00000101337	protein_coding	+	chr20:30697308-30755061	24.5081	8.97953	2.55604	1.44855	5e-05	0.000136014	up	9777	dJ836N17.2	HGNC:HGNC:30797|Ensembl:ENSG00000101337|HPRD:15514|Vega:OTTHUMG00000032206	20	20q11.21	transmembrane 9 superfamily protein member 4		GO:0016021(integral component of membrane)
MROH8	ENSG00000101353	protein_coding	-	chr20:35729628-35870022	3.1776	0.59079	2.62612	2.42722	0.00075	0.00170242	up	140699	C20orf131|C20orf132|dJ621N11.3|dJ621N11.4	HGNC:HGNC:16125|Ensembl:ENSG00000101353|HPRD:12745|Vega:OTTHUMG00000032407	20	20q11.22	maestro heat like repeat family member 8
CDK5RAP1	ENSG00000101391	protein_coding	-	chr20:31946644-31989367	19.6095	9.13841	2.03281	1.10154	5e-05	0.000136014	up	51654	C20orf34|C42|CGI-05|HSPC167	MIM:608200|HGNC:HGNC:15880|Ensembl:ENSG00000101391|HPRD:12189|Vega:OTTHUMG00000032256	20	20q11.21	CDK5 regulatory subunit associated protein 1		GO:0005575(cellular_component)//GO:0005737(cytoplasm)	GO:0051539(4 iron, 4 sulfur cluster binding)//GO:0035596(methylthiotransferase activity)//GO:0032403(protein complex binding)//GO:0019901(protein kinase binding)//GO:0019887(protein kinase regulator activity)//GO:0003824(catalytic activity)//GO:0046872(metal ion binding)	GO:0007420(brain development)//GO:0009451(RNA modification)//GO:0045664(regulation of neuron differentiation)//GO:0045736(negative regulation of cyclin-dependent protein serine/threonine kinase activity)//GO:0035600(tRNA methylthiolation)
PXMP4	ENSG00000101417	protein_coding	-	chr20:32294511-32308125	5.76246	1.83947	2.38159	1.6474	5e-05	0.000136014	up	11264	PMP24	MIM:616397|HGNC:HGNC:15920|Ensembl:ENSG00000101417|HPRD:10177|Vega:OTTHUMG00000032273	20	20q11.22	peroxisomal membrane protein 4	hsa04146(Peroxisome)	GO:0005777(peroxisome)//GO:0005778(peroxisomal membrane)//GO:0016021(integral component of membrane)	GO:0005515(protein binding)	GO:0008150(biological_process)
TNNC2	ENSG00000101470	protein_coding	-	chr20:44451852-44462384	1.93991	0.71121	1.71803	1.44764	0.01235	0.0218021	up	7125	-	MIM:191039|HGNC:HGNC:11944|Ensembl:ENSG00000101470|HPRD:08929|Vega:OTTHUMG00000032623	20	20q12-q13.11	troponin C2, fast skeletal type	hsa04020(Calcium signaling pathway)	GO:0005861(troponin complex)//GO:0005829(cytosol)	GO:0003779(actin binding)//GO:0005515(protein binding)//GO:0005509(calcium ion binding)	GO:0006937(regulation of muscle contraction)//GO:0003009(skeletal muscle contraction)//GO:0030049(muscle filament sliding)
RBFA	ENSG00000101546	protein_coding	+	chr18:77794345-77854968	12.8132	3.63966	2.9772	1.81576	5e-05	0.000136014	up	79863	C18orf22|HsT169	HGNC:HGNC:26120|HPRD:07959	18	18q23	ribosome binding factor A (putative)		GO:0005739(mitochondrion)//GO:0005575(cellular_component)	GO:0003674(molecular_function)//GO:0005515(protein binding)	GO:0006364(rRNA processing)//GO:0008150(biological_process)
CEP76	ENSG00000101624	protein_coding	-	chr18:12438888-12725739	7.73093	2.49394	2.49888	1.63221	0.00415	0.00814124	up	79959	C18orf9|HsT1705	HGNC:HGNC:25727|Ensembl:ENSG00000101624|HPRD:12694|Vega:OTTHUMG00000131701	18	18p11.21	centrosomal protein 76kDa		GO:0043234(protein complex)//GO:0005813(centrosome)//GO:0005814(centriole)//GO:0005829(cytosol)	GO:0005515(protein binding)	GO:0046599(regulation of centriole replication)//GO:0000086(G2/M transition of mitotic cell cycle)//GO:0000278(mitotic cell cycle)//GO:0006996(organelle organization)
NOL4	ENSG00000101746	protein_coding	-	chr18:31431063-31804916	1.33384	0.602276	1.45658	1.14709	0.0287	0.0464003	up	8715	CT125|HRIHFB2255|NOLP	MIM:603577|HGNC:HGNC:7870|Ensembl:ENSG00000101746|HPRD:04657|Vega:OTTHUMG00000132291	18	18q12	nucleolar protein 4		GO:0005730(nucleolus)//GO:0005634(nucleus)	GO:0003723(RNA binding)//GO:0005515(protein binding)
SCML2	ENSG00000102098	protein_coding	-	chrX:18257432-18372847	2.72218	0.0886547	3.41906	4.94042	0.00095	0.00211614	up	10389	-	MIM:300208|HGNC:HGNC:10581|Ensembl:ENSG00000102098|HPRD:02195|Vega:OTTHUMG00000021212	X	Xp22	sex comb on midleg-like 2 (Drosophila)		GO:0031519(PcG protein complex)//GO:0005634(nucleus)	GO:0003677(DNA binding)//GO:0003700(transcription factor activity, sequence-specific DNA binding)	GO:0009653(anatomical structure morphogenesis)//GO:0006351(transcription, DNA-templated)//GO:0006355(regulation of transcription, DNA-templated)
PORCN	ENSG00000102312	protein_coding	+	chrX:48367349-48379202	4.80299	1.6715	2.17218	1.52279	0.0004	0.000954907	up	64840	DHOF|FODH|MG61|PORC|PPN	MIM:300651|HGNC:HGNC:17652|Ensembl:ENSG00000102312|HPRD:06680|Vega:OTTHUMG00000024116	X	Xp11.23	porcupine homolog (Drosophila)	hsa04310(Wnt signaling pathway)	GO:0005783(endoplasmic reticulum)//GO:0016021(integral component of membrane)//GO:0032281(AMPA glutamate receptor complex)//GO:0005789(endoplasmic reticulum membrane)//GO:0030176(integral component of endoplasmic reticulum membrane)	GO:0017147(Wnt-protein binding)//GO:1990698(palmitoleoyltransferase activity)	GO:0060070(canonical Wnt signaling pathway)//GO:0009100(glycoprotein metabolic process)//GO:0016055(Wnt signaling pathway)//GO:0006497(protein lipidation)//GO:0045234(protein palmitoleylation)
ITIH6	ENSG00000102313	protein_coding	-	chrX:54775331-54824673	4.96706	1.26423	2.63536	1.97413	5e-05	0.000136014	up	347365	ITIH5L|UNQ6369|dJ14O9.1	HGNC:HGNC:28907|Ensembl:ENSG00000102313|HPRD:17164|Vega:OTTHUMG00000021634	X	Xp11.22-p11.21	inter-alpha-trypsin inhibitor heavy chain family member 6		GO:0005576(extracellular region)	GO:0004867(serine-type endopeptidase inhibitor activity)	GO:0030212(hyaluronan metabolic process)//GO:0010951(negative regulation of endopeptidase activity)
SRPX2	ENSG00000102359	protein_coding	+	chrX:99899214-99926296	52.6226	14.4303	3.47515	1.86658	5e-05	0.000136014	up	27286	BPP|CBPS|PMGX|RESDX|SRPUL	MIM:300642|HGNC:HGNC:30668|Ensembl:ENSG00000102359|HPRD:06726|Vega:OTTHUMG00000022003	X	Xq22.1	sushi-repeat containing protein, X-linked 2		GO:0097060(synaptic membrane)//GO:0009986(cell surface)//GO:0060076(excitatory synapse)//GO:0030054(cell junction)//GO:0005615(extracellular space)//GO:0005737(cytoplasm)	GO:0005102(receptor binding)//GO:0005515(protein binding)//GO:0042802(identical protein binding)//GO:0036458(hepatocyte growth factor binding)	GO:0048870(cell motility)//GO:0042325(regulation of phosphorylation)//GO:0071625(vocalization behavior)//GO:0051965(positive regulation of synapse assembly)//GO:0016337(single organismal cell-cell adhesion)//GO:0090050(positive regulation of cell migration involved in sprouting angiogenesis)//GO:0001525(angiogenesis)
HTR2A	ENSG00000102468	protein_coding	-	chr13:47402275-47471169	1.75358	0.593827	1.72765	1.56219	5e-05	0.000136014	up	3356	5-HT2A|HTR2	MIM:182135|HGNC:HGNC:5293|Ensembl:ENSG00000102468|HPRD:01638|Vega:OTTHUMG00000016881	13	13q14-q21	5-hydroxytryptamine receptor 2A	hsa04020(Calcium signaling pathway)//hsa04080(Neuroactive ligand-receptor interaction)//hsa04540(Gap junction)//hsa04726(Serotonergic synapse)//hsa04750(Inflammatory mediator regulation of TRP channels)	GO:0005886(plasma membrane)//GO:0005887(integral component of plasma membrane)//GO:0005901(caveola)//GO:0030424(axon)//GO:0005829(cytosol)//GO:0070852(cell body fiber)//GO:0043198(dendritic shaft)//GO:0016023(cytoplasmic, membrane-bounded vesicle)//GO:0043025(neuronal cell body)	GO:0032403(protein complex binding)//GO:0001618(virus receptor activity)//GO:0001965(G-protein alpha-subunit binding)//GO:0004993(G-protein coupled serotonin receptor activity)//GO:0051378(serotonin binding)//GO:0071886(1-(4-iodo-2,5-dimethoxyphenyl)propan-2-amine binding)//GO:0008144(drug binding)	GO:0048148(behavioral response to cocaine)//GO:0045821(positive regulation of glycolytic process)//GO:0044380(protein localization to cytoskeleton)//GO:0045600(positive regulation of fat cell differentiation)//GO:0045907(positive regulation of vasoconstriction)//GO:0014824(artery smooth muscle contraction)//GO:0051967(negative regulation of synaptic transmission, glutamatergic)//GO:0014832(urinar…
TNFSF13B	ENSG00000102524	protein_coding	+	chr13:108903587-108960832	5.25225	0.951716	3.20346	2.46433	0.0009	0.00201185	up	10673	BAFF|BLYS|CD257|DTL|TALL-1|TALL1|THANK|TNFSF20|TNLG7A|ZTNF4	MIM:603969|HGNC:HGNC:11929|Ensembl:ENSG00000102524|HPRD:04914|Vega:OTTHUMG00000017329	13	13q32-q34	tumor necrosis factor superfamily member 13b	hsa04060(Cytokine-cytokine receptor interaction)//hsa04064(NF-kappa B signaling pathway)//hsa04672(Intestinal immune network for IgA production)//hsa05323(Rheumatoid arthritis)	GO:0005886(plasma membrane)//GO:0005576(extracellular region)//GO:0048471(perinuclear region of cytoplasm)//GO:0016021(integral component of membrane)//GO:0005615(extracellular space)//GO:0005737(cytoplasm)	GO:0005102(receptor binding)//GO:0005515(protein binding)//GO:0005164(tumor necrosis factor receptor binding)//GO:0005125(cytokine activity)	GO:0030890(positive regulation of B cell proliferation)//GO:0008284(positive regulation of cell proliferation)//GO:0031296(B cell costimulation)//GO:0042102(positive regulation of T cell proliferation)//GO:0001782(B cell homeostasis)//GO:0002636(positive regulation of germinal center formation)//GO:0008283(cell proliferation)//GO:0031295(T cell costimulation)//GO:0048305(immunoglobulin secretion)…
CDADC1	ENSG00000102543	protein_coding	+	chr13:49822046-49867622	10.0336	4.70579	1.93376	1.09233	0.0005	0.00117341	up	81602	NYD-SP15|bA103J18.1	HGNC:HGNC:20299|Ensembl:ENSG00000102543|HPRD:16693|Vega:OTTHUMG00000016913	13	13q14.2	cytidine and dCMP deaminase domain containing 1			GO:0003824(catalytic activity)//GO:0008270(zinc ion binding)//GO:0016787(hydrolase activity)	GO:0008152(metabolic process)
ACP5	ENSG00000102575	protein_coding	-	chr19:11670188-11729950	6.12399	0.448805	4.91715	3.77031	5e-05	0.000136014	up	54	HPAP|SPENCDI|TRAP	MIM:171640|HGNC:HGNC:124|Ensembl:ENSG00000102575|HPRD:01374|Vega:OTTHUMG00000182036	19	19p13.2	acid phosphatase 5, tartrate resistant	hsa04142(Lysosome)//hsa04380(Osteoclast differentiation)//hsa05323(Rheumatoid arthritis)	GO:0005764(lysosome)//GO:0016021(integral component of membrane)//GO:0005615(extracellular space)//GO:0070062(extracellular exosome)//GO:0005829(cytosol)	GO:0003993(acid phosphatase activity)//GO:0008199(ferric iron binding)//GO:0008198(ferrous iron binding)//GO:0016787(hydrolase activity)	GO:0045019(negative regulation of nitric oxide biosynthetic process)//GO:0008152(metabolic process)//GO:0033555(multicellular organismal response to stress)//GO:0032691(negative regulation of interleukin-1 beta production)//GO:0032929(negative regulation of superoxide anion generation)//GO:0070723(response to cholesterol)//GO:0006767(water-soluble vitamin metabolic process)//GO:0030316(osteoclast…
FGF9	ENSG00000102678	protein_coding	+	chr13:22245521-22278637	3.00955	0.474128	2.71995	2.6662	5e-05	0.000136014	up	2254	FGF-9|GAF|HBFG-9|HBGF-9|SYNS3	MIM:600921|HGNC:HGNC:3687|Ensembl:ENSG00000102678|HPRD:02951|Vega:OTTHUMG00000017412	13	13q11-q12	fibroblast growth factor 9	hsa04010(MAPK signaling pathway)//hsa04014(Ras signaling pathway)//hsa04015(Rap1 signaling pathway)//hsa04151(PI3K-Akt signaling pathway)//hsa04810(Regulation of actin cytoskeleton)//hsa05200(Pathways in cancer)//hsa05218(Melanoma)	GO:0005604(basement membrane)//GO:0070062(extracellular exosome)//GO:0005576(extracellular region)//GO:0005615(extracellular space)//GO:0005737(cytoplasm)	GO:0008201(heparin binding)//GO:0008083(growth factor activity)//GO:0005104(fibroblast growth factor receptor binding)	GO:0045880(positive regulation of smoothened signaling pathway)//GO:0051781(positive regulation of cell division)//GO:0030326(embryonic limb morphogenesis)//GO:0008584(male gonad development)//GO:0010628(positive regulation of gene expression)//GO:0048011(neurotrophin TRK receptor signaling pathway)//GO:0000122(negative regulation of transcription from RNA polymerase II promoter)//GO:0048706(embr…
SUPT20H	ENSG00000102710	protein_coding	-	chr13:37523911-37633850	22.0876	9.31408	2.23845	1.24575	5e-05	0.000136014	up	55578	C13|C13orf19|FAM48A|FP757|P38IP|SPT20	MIM:613417|HGNC:HGNC:20596|Ensembl:ENSG00000102710|HPRD:10135|Vega:OTTHUMG00000016747	13	13q13.3	SPT20 homolog, SAGA complex component		GO:0000124(SAGA complex)//GO:0070461(SAGA-type complex)	GO:0005515(protein binding)//GO:0003712(transcription cofactor activity)	GO:0006325(chromatin organization)//GO:0035948(positive regulation of gluconeogenesis by positive regulation of transcription from RNA polymerase II promoter)//GO:1903506(regulation of nucleic acid-templated transcription)//GO:0006914(autophagy)//GO:0007369(gastrulation)
SLC25A15	ENSG00000102743	protein_coding	+	chr13:41363547-41384247	1.99702	0.770469	1.69278	1.37404	0.0023	0.00475176	up	10166	D13S327|HHH|ORC1|ORNT1	MIM:603861|HGNC:HGNC:10985|HPRD:04838	13	13q14	solute carrier family 25 member 15		GO:0016021(integral component of membrane)//GO:0005743(mitochondrial inner membrane)	GO:0003735(structural constituent of ribosome)//GO:0000064(L-ornithine transmembrane transporter activity)	GO:0000066(mitochondrial ornithine transport)//GO:0006595(polyamine metabolic process)//GO:0000050(urea cycle)//GO:0006412(translation)//GO:1903352(L-ornithine transmembrane transport)//GO:0006520(cellular amino acid metabolic process)//GO:0034641(cellular nitrogen compound metabolic process)//GO:0044281(small molecule metabolic process)//GO:0006810(transport)
RGCC	ENSG00000102760	protein_coding	+	chr13:42031694-42045018	95.4279	45.6555	2.06681	1.06362	5e-05	0.000136014	up	28984	C13orf15|RGC-32|RGC32|bA157L14.2	MIM:610077|HGNC:HGNC:20369|Ensembl:ENSG00000102760|HPRD:17970|Vega:OTTHUMG00000016796	13	13q14.11	regulator of cell cycle		GO:0005813(centrosome)//GO:0005634(nucleus)//GO:0005737(cytoplasm)	GO:0019901(protein kinase binding)//GO:0030295(protein kinase activator activity)//GO:0005515(protein binding)//GO:0070412(R-SMAD binding)	GO:0050715(positive regulation of cytokine secretion)//GO:0001100(negative regulation of exit from mitosis)//GO:0010628(positive regulation of gene expression)//GO:0050710(negative regulation of cytokine secretion)//GO:0008285(negative regulation of cell proliferation)//GO:0016525(negative regulation of angiogenesis)//GO:0071158(positive regulation of cell cycle arrest)//GO:0032147(activation of …
CLN5	ENSG00000102805	protein_coding	+	chr13:77564794-77601330	11.8146	5.28913	2.03758	1.15947	5e-05	0.000136014	up	1203	NCL	MIM:608102|HGNC:HGNC:2076|HPRD:07619	13	13q21.1-q32	ceroid-lipofuscinosis, neuronal 5	hsa04142(Lysosome)	GO:0005764(lysosome)//GO:0070062(extracellular exosome)//GO:0005775(vacuolar lumen)//GO:0048471(perinuclear region of cytoplasm)//GO:0005794(Golgi apparatus)//GO:0016021(integral component of membrane)//GO:0005765(lysosomal membrane)//GO:0005783(endoplasmic reticulum)	GO:0005537(mannose binding)//GO:0005515(protein binding)	GO:0070085(glycosylation)//GO:0006465(signal peptide processing)//GO:0007420(brain development)//GO:0007040(lysosome organization)//GO:0042551(neuron maturation)//GO:0022008(neurogenesis)//GO:0030163(protein catabolic process)//GO:0007601(visual perception)//GO:0007042(lysosomal lumen acidification)
TSNAXIP1	ENSG00000102904	protein_coding	+	chr16:67840667-67906470	2.45635	0.561959	2.21283	2.12798	5e-05	0.000136014	up	55815	TXI1	MIM:607720|HGNC:HGNC:18586|Ensembl:ENSG00000102904|HPRD:09656|Vega:OTTHUMG00000137545	16	16q22.1	translin-associated factor X interacting protein 1		GO:0005575(cellular_component)//GO:0005737(cytoplasm)//GO:0048471(perinuclear region of cytoplasm)	GO:0003674(molecular_function)	GO:0007275(multicellular organism development)//GO:0007283(spermatogenesis)//GO:0008150(biological_process)//GO:0030154(cell differentiation)
COG4	ENSG00000103051	protein_coding	-	chr16:70514470-70557468	27.7548	11.9864	2.21422	1.21134	5e-05	0.000136014	up	25839	CDG2J|COD1	MIM:606976|HGNC:HGNC:18620|Ensembl:ENSG00000103051|HPRD:08444|Vega:OTTHUMG00000128515	16	16q22.1	component of oligomeric golgi complex 4		GO:0005783(endoplasmic reticulum)//GO:0017119(Golgi transport complex)//GO:0000139(Golgi membrane)	GO:0005515(protein binding)	GO:0061024(membrane organization)//GO:0044267(cellular protein metabolic process)//GO:0048193(Golgi vesicle transport)//GO:0048213(Golgi vesicle prefusion complex stabilization)//GO:0006890(retrograde vesicle-mediated transport, Golgi to ER)//GO:0000301(retrograde transport, vesicle recycling within Golgi)//GO:0043687(post-translational protein modification)//GO:0007030(Golgi organization)//GO:00…
SLC7A6	ENSG00000103064	protein_coding	+	chr16:68298418-68344849	33.688	13.2394	2.43606	1.3474	5e-05	0.000136014	up	9057	LAT-2|LAT3|y+LAT-2	MIM:605641|HGNC:HGNC:11064|Ensembl:ENSG00000103064|HPRD:12031|Vega:OTTHUMG00000176544	16	16q22.1	solute carrier family 7 member 6		GO:0016323(basolateral plasma membrane)//GO:0016021(integral component of membrane)//GO:0005887(integral component of plasma membrane)//GO:0005886(plasma membrane)	GO:0015179(L-amino acid transmembrane transporter activity)//GO:0015297(antiporter activity)//GO:0015171(amino acid transmembrane transporter activity)	GO:1902475(L-alpha-amino acid transmembrane transport)//GO:0007596(blood coagulation)//GO:0015807(L-amino acid transport)//GO:0050900(leukocyte migration)//GO:0006865(amino acid transport)//GO:0006520(cellular amino acid metabolic process)//GO:0055085(transmembrane transport)//GO:0006461(protein complex assembly)//GO:0003333(amino acid transmembrane transport)//GO:0006810(transport)//GO:0006811(i…
USP10	ENSG00000103194	protein_coding	+	chr16:84733583-84813528	30.546	13.8918	2.11835	1.13675	5e-05	0.000136014	up	9100	UBPO	MIM:609818|HGNC:HGNC:12608|Ensembl:ENSG00000103194|HPRD:07029|Vega:OTTHUMG00000176770	16	16q24.1	ubiquitin specific peptidase 10		GO:0005622(intracellular)//GO:0005769(early endosome)//GO:0005634(nucleus)//GO:0005737(cytoplasm)//GO:0005654(nucleoplasm)	GO:0004197(cysteine-type endopeptidase activity)//GO:0044325(ion channel binding)//GO:0002039(p53 binding)//GO:0044822(poly(A) RNA binding)//GO:0005515(protein binding)//GO:0004843(thiol-dependent ubiquitin-specific protease activity)	GO:0016579(protein deubiquitination)//GO:0030330(DNA damage response, signal transduction by p53 class mediator)//GO:0010506(regulation of autophagy)//GO:0006511(ubiquitin-dependent protein catabolic process)//GO:0006914(autophagy)//GO:0019985(translesion synthesis)//GO:0006281(DNA repair)
FAM173A	ENSG00000103254	protein_coding	+	chr16:770580-791329	4.31231	0.991438	2.66757	2.12087	0.00105	0.00231686	up	65990	C16orf24	HGNC:HGNC:14152|Ensembl:ENSG00000103254|HPRD:14500|Vega:OTTHUMG00000121177	16	16p13.3	family with sequence similarity 173 member A		GO:0016021(integral component of membrane)
GGA2	ENSG00000103365	protein_coding	-	chr16:23474862-23533316	35.7302	17.7249	1.96157	1.01137	5e-05	0.000136014	up	23062	VEAR	MIM:606005|HGNC:HGNC:16064|Ensembl:ENSG00000103365|HPRD:09347|Vega:OTTHUMG00000096957	16	16p12	golgi-associated, gamma adaptin ear containing, ARF binding protein 2	hsa04142(Lysosome)	GO:0030136(clathrin-coated vesicle)//GO:0030131(clathrin adaptor complex)//GO:0005802(trans-Golgi network)//GO:0010008(endosome membrane)//GO:0005794(Golgi apparatus)//GO:0005622(intracellular)	GO:0030306(ADP-ribosylation factor binding)//GO:0005515(protein binding)	GO:0044267(cellular protein metabolic process)//GO:0016192(vesicle-mediated transport)//GO:0006886(intracellular protein transport)
XYLT1	ENSG00000103489	protein_coding	-	chr16:17195625-17564738	17.969	8.26497	2.04739	1.12042	5e-05	0.000136014	up	64131	DBQD2|PXYLT1|XT-I|XT1|XTI|XYLTI	MIM:608124|HGNC:HGNC:15516|Ensembl:ENSG00000103489|HPRD:12168|Vega:OTTHUMG00000129975	16	16p12.3	xylosyltransferase I	hsa00532(Glycosaminoglycan biosynthesis - chondroitin sulfate / dermatan sulfate)//hsa00534(Glycosaminoglycan biosynthesis - heparan sulfate / heparin)//	GO:0005789(endoplasmic reticulum membrane)//GO:0016021(integral component of membrane)//GO:0005576(extracellular region)//GO:0000139(Golgi membrane)	GO:0008375(acetylglucosaminyltransferase activity)//GO:0030158(protein xylosyltransferase activity)	GO:0006024(glycosaminoglycan biosynthetic process)//GO:0015012(heparan sulfate proteoglycan biosynthetic process)//GO:0034605(cellular response to heat)//GO:0030206(chondroitin sulfate biosynthetic process)
CCP110	ENSG00000103540	protein_coding	+	chr16:19535132-19564730	15.0758	5.96102	2.3094	1.3386	5e-05	0.000136014	up	9738	CP110|Cep110	MIM:609544|HGNC:HGNC:24342|Ensembl:ENSG00000103540|HPRD:10848|Vega:OTTHUMG00000131459	16	16p12.3	centriolar coiled-coil protein 110kDa		GO:0043234(protein complex)//GO:0005813(centrosome)//GO:0005814(centriole)//GO:0005929(cilium)//GO:0005829(cytosol)	GO:0005515(protein binding)	GO:0007099(centriole replication)//GO:0030030(cell projection organization)//GO:0000278(mitotic cell cycle)//GO:0006996(organelle organization)//GO:0051298(centrosome duplication)//GO:0032465(regulation of cytokinesis)//GO:0000086(G2/M transition of mitotic cell cycle)
TRIP4	ENSG00000103671	protein_coding	+	chr15:64679946-64747502	21.2646	10.0224	2.01994	1.08523	5e-05	0.000136014	up	9325	ASC-1|ASC1|HsT17391|ZC2HC5	MIM:604501|HGNC:HGNC:12310|Ensembl:ENSG00000103671|HPRD:05140|Vega:OTTHUMG00000133033	15	15q22.31	thyroid hormone receptor interactor 4		GO:0005829(cytosol)//GO:0005654(nucleoplasm)//GO:0005634(nucleus)//GO:0005737(cytoplasm)//GO:0005815(microtubule organizing center)	GO:0030331(estrogen receptor binding)//GO:0008270(zinc ion binding)//GO:0044389(ubiquitin-like protein ligase binding)//GO:0016922(ligand-dependent nuclear receptor binding)//GO:0002020(protease binding)//GO:0005515(protein binding)//GO:0035035(histone acetyltransferase binding)//GO:0003713(transcription coactivator activity)	GO:0030520(intracellular estrogen receptor signaling pathway)//GO:1901998(toxin transport)//GO:0006366(transcription from RNA polymerase II promoter)//GO:0006355(regulation of transcription, DNA-templated)//GO:0045893(positive regulation of transcription, DNA-templated)
HOMER2	ENSG00000103942	protein_coding	-	chr15:83509837-83772195	2.67134	1.02909	1.80935	1.37619	0.00745	0.0138327	up	9455	ACPD|CPD|DFNA68|HOMER-2|VESL-2	MIM:604799|HGNC:HGNC:17513|Ensembl:ENSG00000103942|HPRD:07269|Vega:OTTHUMG00000172462	15	15q24.3	homer scaffolding protein 2	hsa04068(FoxO signaling pathway)//hsa04724(Glutamatergic synapse)	GO:0005886(plasma membrane)//GO:0045177(apical part of cell)//GO:0030425(dendrite)//GO:0014069(postsynaptic density)//GO:0030054(cell junction)//GO:0005730(nucleolus)//GO:0005634(nucleus)//GO:0045211(postsynaptic membrane)//GO:0005737(cytoplasm)//GO:0043025(neuronal cell body)	GO:0019904(protein domain specific binding)//GO:0042803(protein homodimerization activity)//GO:0003779(actin binding)//GO:0035256(G-protein coupled glutamate receptor binding)//GO:0046982(protein heterodimerization activity)//GO:0030160(GKAP/Homer scaffold activity)//GO:0005515(protein binding)	GO:0008277(regulation of G-protein coupled receptor protein signaling pathway)//GO:0048148(behavioral response to cocaine)//GO:0007216(G-protein coupled glutamate receptor signaling pathway)//GO:0035584(calcium-mediated signaling using intracellular calcium source)//GO:0048875(chemical homeostasis within a tissue)
SPG11	ENSG00000104133	protein_coding	-	chr15:44829254-44955876	58.8052	27.4881	2.0993	1.09714	5e-05	0.000136014	up	80208	ALS5|CMT2X|KIAA1840	MIM:610844|HGNC:HGNC:11226|Ensembl:ENSG00000104133|HPRD:07963|Vega:OTTHUMG00000131199	15	15q14	spastic paraplegia 11 (autosomal recessive)		GO:0045202(synapse)//GO:0005886(plasma membrane)//GO:0070062(extracellular exosome)//GO:0030425(dendrite)//GO:0030424(axon)//GO:0016021(integral component of membrane)//GO:0005829(cytosol)//GO:0005765(lysosomal membrane)//GO:0031410(cytoplasmic vesicle)//GO:0005730(nucleolus)//GO:0005737(cytoplasm)	GO:0005515(protein binding)	GO:0048675(axon extension)//GO:0008088(axo-dendritic transport)
OIP5	ENSG00000104147	protein_coding	-	chr15:41576187-41624819	4.02417	0.273695	3.94456	3.87805	0.00545	0.010419	up	11339	5730547N13Rik|CT86|LINT-25|MIS18B|MIS18beta|hMIS18beta	MIM:606020|HGNC:HGNC:20300|Ensembl:ENSG00000104147|HPRD:09352|Vega:OTTHUMG00000130251	15	15q15.1	Opa interacting protein 5		GO:0010369(chromocenter)//GO:0015030(Cajal body)//GO:0000785(chromatin)//GO:0005654(nucleoplasm)//GO:0005634(nucleus)//GO:0000775(chromosome, centromeric region)//GO:0005737(cytoplasm)	GO:0005515(protein binding)	GO:0051301(cell division)//GO:0007154(cell communication)//GO:0007067(mitotic nuclear division)//GO:0006334(nucleosome assembly)//GO:0034080(CENP-A containing nucleosome assembly)
BRF2	ENSG00000104221	protein_coding	-	chr8:37641708-37707422	10.8314	3.55812	2.59568	1.60603	5e-05	0.000136014	up	55290	BRFU|TFIIIB50	MIM:607013|HGNC:HGNC:17298|HPRD:06115	8	8p11.23	BRF2, RNA polymerase III transcription initiation factor 50 kDa subunit		GO:0005654(nucleoplasm)	GO:0008270(zinc ion binding)	GO:0006383(transcription from RNA polymerase III promoter)//GO:0006352(DNA-templated transcription, initiation)//GO:0010467(gene expression)//GO:0006355(regulation of transcription, DNA-templated)
POP1	ENSG00000104356	protein_coding	+	chr8:99129524-99172062	5.6615	1.8352	2.34957	1.62524	0.0039	0.00770658	up	10940	-	MIM:602486|HGNC:HGNC:30129|Ensembl:ENSG00000104356|HPRD:03923|Vega:OTTHUMG00000164635	8	8q22.1	POP1 homolog, ribonuclease P/MRP subunit	hsa03008(Ribosome biogenesis in eukaryotes)//hsa03013(RNA transport)	GO:0005654(nucleoplasm)//GO:0005655(nucleolar ribonuclease P complex)//GO:0000172(ribonuclease MRP complex)//GO:0005615(extracellular space)	GO:0044822(poly(A) RNA binding)//GO:0004526(ribonuclease P activity)//GO:0000171(ribonuclease MRP activity)//GO:0005515(protein binding)	GO:0001682(tRNA 5'-leader removal)//GO:0090502(RNA phosphodiester bond hydrolysis, endonucleolytic)//GO:0090501(RNA phosphodiester bond hydrolysis)//GO:0010467(gene expression)//GO:0016078(tRNA catabolic process)//GO:0008033(tRNA processing)
WISP1	ENSG00000104415	protein_coding	+	chr8:134203281-134243932	5.36235	1.34435	2.71391	1.99596	5e-05	0.000136014	up	8840	CCN4|WISP1c|WISP1i|WISP1tc	MIM:603398|HGNC:HGNC:12769|HPRD:16019	8	8q24.22	WNT1 inducible signaling pathway protein 1		GO:0005578(proteinaceous extracellular matrix)//GO:0005615(extracellular space)//GO:0005737(cytoplasm)	GO:0008201(heparin binding)//GO:0005178(integrin binding)//GO:0005520(insulin-like growth factor binding)	GO:0007267(cell-cell signaling)//GO:0016055(Wnt signaling pathway)//GO:0060548(negative regulation of cell death)//GO:0007155(cell adhesion)//GO:0001558(regulation of cell growth)//GO:0007165(signal transduction)
ARMC1	ENSG00000104442	protein_coding	-	chr8:66514693-66546442	13.5567	5.24521	2.33086	1.36993	5e-05	0.000136014	up	55156	Arcp	HGNC:HGNC:17684|Ensembl:ENSG00000104442|HPRD:16506|Vega:OTTHUMG00000164374	8	8q13.1	armadillo repeat containing 1		GO:0005739(mitochondrion)	GO:0046872(metal ion binding)//GO:0005515(protein binding)	GO:0030001(metal ion transport)
TRPS1	ENSG00000104447	protein_coding	-	chr8:116420723-116821899	96.5707	26.0993	3.60049	1.88758	5e-05	0.000136014	up	7227	GC79|LGCR	MIM:604386|HGNC:HGNC:12340|Ensembl:ENSG00000104447|HPRD:05091|Vega:OTTHUMG00000142829	8	8q24.12	transcriptional repressor GATA binding 1		GO:0005654(nucleoplasm)//GO:0005667(transcription factor complex)//GO:0005634(nucleus)	GO:0008270(zinc ion binding)//GO:0003700(transcription factor activity, sequence-specific DNA binding)//GO:0043565(sequence-specific DNA binding)//GO:0003682(chromatin binding)//GO:0000977(RNA polymerase II regulatory region sequence-specific DNA binding)//GO:0001085(RNA polymerase II transcription factor binding)//GO:0001228(transcriptional activator activity, RNA polymerase II transcription reg…	GO:0002062(chondrocyte differentiation)//GO:0007507(heart development)//GO:0007178(transmembrane receptor protein serine/threonine kinase signaling pathway)//GO:0009887(organ morphogenesis)//GO:0001501(skeletal system development)//GO:0048468(cell development)//GO:1902043(positive regulation of extrinsic apoptotic signaling pathway via death domain receptors)//GO:0031063(regulation of histone dea…
SQLE	ENSG00000104549	protein_coding	+	chr8:126010738-126034525	5.63254	2.35995	1.974	1.25503	5e-05	0.000136014	up	6713	-	MIM:602019|HGNC:HGNC:11279|Ensembl:ENSG00000104549|HPRD:11802|Vega:OTTHUMG00000164990	8	8q24.1	squalene epoxidase	hsa00100(Steroid biosynthesis)//	GO:0016021(integral component of membrane)//GO:0005789(endoplasmic reticulum membrane)	GO:0071949(FAD binding)//GO:0050660(flavin adenine dinucleotide binding)//GO:0016491(oxidoreductase activity)//GO:0004506(squalene monooxygenase activity)	GO:0055114(oxidation-reduction process)//GO:0044281(small molecule metabolic process)//GO:0006725(cellular aromatic compound metabolic process)//GO:0006695(cholesterol biosynthetic process)//GO:0016126(sterol biosynthetic process)//GO:0010033(response to organic substance)
SLC39A14	ENSG00000104635	protein_coding	+	chr8:22224761-22291642	136.403	21.7673	6.0351	2.64764	5e-05	0.000136014	up	23516	LZT-Hs4|NET34|ZIP14|cig19	MIM:608736|HGNC:HGNC:20858|Ensembl:ENSG00000104635|HPRD:12288|Vega:OTTHUMG00000097791	8	8p21.3	solute carrier family 39 member 14		GO:0005886(plasma membrane)//GO:0005887(integral component of plasma membrane)//GO:0030027(lamellipodium)//GO:0005794(Golgi apparatus)//GO:0016021(integral component of membrane)//GO:0005783(endoplasmic reticulum)	GO:0046873(metal ion transmembrane transporter activity)//GO:0005385(zinc ion transmembrane transporter activity)//GO:0015093(ferrous iron transmembrane transporter activity)	GO:0030001(metal ion transport)//GO:0071578(zinc II ion transmembrane import)//GO:0006882(cellular zinc ion homeostasis)//GO:1903874(ferrous iron transmembrane transport)//GO:0055085(transmembrane transport)//GO:0071577(zinc II ion transmembrane transport)
R3HCC1	ENSG00000104679	protein_coding	+	chr8:23127632-23153792	18.1012	5.87984	2.7764	1.62224	5e-05	0.000136014	up	203069	-	HGNC:HGNC:27329|Ensembl:ENSG00000104679|Vega:OTTHUMG00000163786	8	8p21.3	R3H domain and coiled-coil containing 1		GO:0035145(exon-exon junction complex)	GO:0000166(nucleotide binding)//GO:0003676(nucleic acid binding)
NEFM	ENSG00000104722	protein_coding	+	chr8:24769677-24776607	2.97459	0.502245	2.64577	2.56623	5e-05	0.000136014	up	4741	NEF3|NF-M|NFM	MIM:162250|HGNC:HGNC:7734|Ensembl:ENSG00000104722|HPRD:01205|Vega:OTTHUMG00000131990	8	8p21	neurofilament, medium polypeptide	hsa05014(Amyotrophic lateral sclerosis (ALS))	GO:0097418(neurofibrillary tangle)//GO:0005883(neurofilament)//GO:0030424(axon)	GO:0005198(structural molecule activity)//GO:0005515(protein binding)//GO:0008017(microtubule binding)//GO:0005200(structural constituent of cytoskeleton)	GO:0098779(mitophagy in response to mitochondrial depolarization)//GO:0033693(neurofilament bundle assembly)
SARS2	ENSG00000104835	protein_coding	-	chr19:39405905-39466550	10.4628	4.26491	2.17721	1.29469	0.0067	0.0125656	up	54938	SARS|SARSM|SERS|SYS|SerRS|SerRSmt|mtSerRS	MIM:612804|HGNC:HGNC:17697|Ensembl:ENSG00000104835|HPRD:15295|Vega:OTTHUMG00000182691	19	19q13.2	seryl-tRNA synthetase 2, mitochondrial	hsa00970(Aminoacyl-tRNA biosynthesis)	GO:0005739(mitochondrion)//GO:0005759(mitochondrial matrix)//GO:0005737(cytoplasm)	GO:0004828(serine-tRNA ligase activity)//GO:0005524(ATP binding)//GO:0044822(poly(A) RNA binding)	GO:0010467(gene expression)//GO:0006434(seryl-tRNA aminoacylation)//GO:0006418(tRNA aminoacylation for protein translation)//GO:0097056(selenocysteinyl-tRNA(Sec) biosynthetic process)
LIN7B	ENSG00000104863	protein_coding	+	chr19:49617580-49622397	1.67566	0.406436	1.90244	2.04363	0.01835	0.0311035	up	64130	LIN-7B|MALS-2|MALS2|VELI2	MIM:612331|HGNC:HGNC:17788|Ensembl:ENSG00000104863|HPRD:10040|Vega:OTTHUMG00000134288	19	19q13.3	lin-7 homolog B, crumbs cell polarity complex component		GO:0005923(bicellular tight junction)//GO:0016323(basolateral plasma membrane)//GO:0005886(plasma membrane)//GO:0043005(neuron projection)//GO:0045202(synapse)//GO:0014069(postsynaptic density)//GO:0045211(postsynaptic membrane)//GO:0005911(cell-cell junction)	GO:0030165(PDZ domain binding)//GO:0019904(protein domain specific binding)	GO:0045199(maintenance of epithelial cell apical/basal polarity)//GO:0006887(exocytosis)//GO:0007268(synaptic transmission)//GO:0007264(small GTPase mediated signal transduction)//GO:1903361(protein localization to basolateral plasma membrane)//GO:0015031(protein transport)//GO:0007269(neurotransmitter secretion)
STX10	ENSG00000104915	protein_coding	-	chr19:13254871-13261197	12.7053	4.40994	2.53336	1.5266	5e-05	0.000136014	up	8677	SYN10|hsyn10	MIM:603765|HGNC:HGNC:11428|Ensembl:ENSG00000104915|HPRD:04791|Vega:OTTHUMG00000180759	19	19p13.2	syntaxin 10	hsa04130(SNARE interactions in vesicular transport)	GO:0016021(integral component of membrane)//GO:0005802(trans-Golgi network)//GO:0016020(membrane)//GO:0048471(perinuclear region of cytoplasm)//GO:0031201(SNARE complex)//GO:0000139(Golgi membrane)//GO:0005622(intracellular)//GO:0031982(vesicle)	GO:0005484(SNAP receptor activity)//GO:0005515(protein binding)//GO:0019905(syntaxin binding)	GO:0042147(retrograde transport, endosome to Golgi)//GO:0048193(Golgi vesicle transport)//GO:0032880(regulation of protein localization)//GO:0061025(membrane fusion)//GO:0048278(vesicle docking)//GO:0006886(intracellular protein transport)//GO:0034498(early endosome to Golgi transport)//GO:0006906(vesicle fusion)
MEGF8	ENSG00000105429	protein_coding	+	chr19:42829760-42882921	11.3039	4.78417	2.12717	1.24049	0.01645	0.0281979	up	1954	C19orf49|CRPT2|EGFL4|SBP1	MIM:604267|HGNC:HGNC:3233|Ensembl:ENSG00000105429|HPRD:10370|Vega:OTTHUMG00000150342	19	19q12	multiple EGF like domains 8		GO:0016021(integral component of membrane)//GO:0005634(nucleus)//GO:0070062(extracellular exosome)	GO:0005515(protein binding)//GO:0005509(calcium ion binding)	GO:0030509(BMP signaling pathway)//GO:0061371(determination of heart left/right asymmetry)//GO:0097094(craniofacial suture morphogenesis)//GO:0030326(embryonic limb morphogenesis)//GO:0097155(fasciculation of sensory neuron axon)//GO:0071907(determination of digestive tract left/right asymmetry)//GO:0060972(left/right pattern formation)//GO:0042074(cell migration involved in gastrulation)//GO:006…
HAS1	ENSG00000105509	protein_coding	-	chr19:52216364-52227247	7.15805	1.75009	2.96647	2.03214	5e-05	0.000136014	up	3036	HAS	MIM:601463|HGNC:HGNC:4818|Ensembl:ENSG00000105509|HPRD:03271|Vega:OTTHUMG00000183499	19	19q13.4	hyaluronan synthase 1		GO:0016021(integral component of membrane)//GO:0005887(integral component of plasma membrane)//GO:0005886(plasma membrane)//GO:0005737(cytoplasm)	GO:0050501(hyaluronan synthase activity)	GO:0006024(glycosaminoglycan biosynthetic process)//GO:0036120(cellular response to platelet-derived growth factor stimulus)//GO:0044281(small molecule metabolic process)//GO:0030212(hyaluronan metabolic process)//GO:0045226(extracellular polysaccharide biosynthetic process)//GO:0007155(cell adhesion)//GO:0005975(carbohydrate metabolic process)//GO:0010764(negative regulation of fibroblast migrat…
DBP	ENSG00000105516	protein_coding	-	chr19:49118584-49140695	9.90754	3.42749	2.46359	1.53137	0.00025	0.000618933	up	1628	DABP	MIM:124097|HGNC:HGNC:2697|HPRD:00497	19	19q13.3	D site of albumin promoter (albumin D-box) binding protein		GO:0005634(nucleus)	GO:0001077(transcriptional activator activity, RNA polymerase II core promoter proximal region sequence-specific binding)//GO:0000977(RNA polymerase II regulatory region sequence-specific DNA binding)//GO:0003700(transcription factor activity, sequence-specific DNA binding)	GO:0006357(regulation of transcription from RNA polymerase II promoter)//GO:0007623(circadian rhythm)//GO:0001889(liver development)//GO:0006366(transcription from RNA polymerase II promoter)//GO:0045944(positive regulation of transcription from RNA polymerase II promoter)
CAPS	ENSG00000105519	protein_coding	+	chr19:5904851-5915888	63.0284	16.3325	3.69412	1.94826	5e-05	0.000136014	up	828	CAPS1	MIM:114212|HGNC:HGNC:1487|Ensembl:ENSG00000105519|HPRD:00250|Vega:OTTHUMG00000180619	19	19p13.3	calcyphosine		GO:0005886(plasma membrane)//GO:0005634(nucleus)//GO:0031982(vesicle)//GO:0005737(cytoplasm)//GO:0070062(extracellular exosome)	GO:0005509(calcium ion binding)	GO:0035556(intracellular signal transduction)//GO:0098779(mitophagy in response to mitochondrial depolarization)
MIER2	ENSG00000105556	protein_coding	-	chr19:305572-344798	8.96816	2.65424	2.72783	1.75652	5e-05	0.000136014	up	54531	KIAA1193|Mi-er2	HGNC:HGNC:29210|HPRD:11130	19	19p13.3	MIER family member 2		GO:0005634(nucleus)	GO:0003677(DNA binding)	GO:0006351(transcription, DNA-templated)//GO:0006355(regulation of transcription, DNA-templated)
LILRB5	ENSG00000105609	protein_coding	-	chr19:54754262-54761167	2.30711	0.598817	2.06847	1.9459	5e-05	0.000136014	up	10990	CD85C|LIR-8|LIR8	MIM:604814|HGNC:HGNC:6609|Ensembl:ENSG00000105609|HPRD:11993|Vega:OTTHUMG00000066636	19	19q13.4	leukocyte immunoglobulin like receptor B5	hsa04380(Osteoclast differentiation)	GO:0016021(integral component of membrane)	GO:0004888(transmembrane signaling receptor activity)	GO:0002250(adaptive immune response)//GO:0006952(defense response)//GO:0007166(cell surface receptor signaling pathway)
DNASE2	ENSG00000105612	protein_coding	-	chr19:12986024-12994902	12.8195	5.4037	2.15805	1.24633	5e-05	0.000136014	up	1777	DNASE2A|DNL|DNL2	MIM:126350|HGNC:HGNC:2960|Ensembl:ENSG00000105612|HPRD:00531|Vega:OTTHUMG00000180535	19	19p13.2	deoxyribonuclease II, lysosomal	hsa04142(Lysosome)	GO:0005764(lysosome)//GO:0070062(extracellular exosome)	GO:0004531(deoxyribonuclease II activity)//GO:0003677(DNA binding)	GO:0006915(apoptotic process)//GO:0000737(DNA catabolic process, endonucleolytic)//GO:0006259(DNA metabolic process)//GO:0030218(erythrocyte differentiation)
COMP	ENSG00000105664	protein_coding	-	chr19:18893582-18902123	1720.7	235.701	7.27373	2.86796	5e-05	0.000136014	up	1311	EDM1|EPD1|MED|PSACH|THBS5	MIM:600310|HGNC:HGNC:2227|Ensembl:ENSG00000105664|HPRD:02632|Vega:OTTHUMG00000169318	19	19p13.1	cartilage oligomeric matrix protein	hsa04145(Phagosome)//hsa04151(PI3K-Akt signaling pathway)//hsa04510(Focal adhesion)//hsa04512(ECM-receptor interaction)//hsa05144(Malaria)	GO:0005578(proteinaceous extracellular matrix)//GO:0031012(extracellular matrix)//GO:0070062(extracellular exosome)//GO:0005576(extracellular region)//GO:0005615(extracellular space)	GO:0002020(protease binding)//GO:0005518(collagen binding)//GO:0008201(heparin binding)//GO:0043395(heparan sulfate proteoglycan binding)//GO:0005201(extracellular matrix structural constituent)//GO:0005515(protein binding)//GO:0005509(calcium ion binding)	GO:0030198(extracellular matrix organization)//GO:0009887(organ morphogenesis)//GO:0060173(limb development)//GO:0001501(skeletal system development)//GO:0007155(cell adhesion)//GO:0043066(negative regulation of apoptotic process)//GO:0006915(apoptotic process)//GO:0003417(growth plate cartilage development)
ZNF14	ENSG00000105708	protein_coding	-	chr19:19821279-19843906	6.19114	2.29412	2.18302	1.43227	5e-05	0.000136014	up	7561	GIOT-4|KOX6	MIM:194556|HGNC:HGNC:12924|Ensembl:ENSG00000105708|HPRD:01933|Vega:OTTHUMG00000182362	19	19p13.11	zinc finger protein 14		GO:0005634(nucleus)	GO:0046872(metal ion binding)//GO:0003677(DNA binding)	GO:0006351(transcription, DNA-templated)//GO:0006355(regulation of transcription, DNA-templated)
GRIK5	ENSG00000105737	protein_coding	-	chr19:42502472-42585701	2.73957	1.36021	1.58442	1.01012	0.0006	0.00138733	up	2901	EAA2|GRIK2|GluK5|KA2	MIM:600283|HGNC:HGNC:4583|Ensembl:ENSG00000105737|HPRD:02614|Vega:OTTHUMG00000044573	19	19q13.2	glutamate ionotropic receptor kainate type subunit 5	hsa04080(Neuroactive ligand-receptor interaction)//hsa04724(Glutamatergic synapse)	GO:0005886(plasma membrane)//GO:0043204(perikaryon)//GO:0030425(dendrite)//GO:0014069(postsynaptic density)//GO:0030054(cell junction)//GO:0032983(kainate selective glutamate receptor complex)//GO:0005783(endoplasmic reticulum)//GO:0042734(presynaptic membrane)//GO:0045211(postsynaptic membrane)//GO:0043195(terminal bouton)	GO:0017124(SH3 domain binding)//GO:0015277(kainate selective glutamate receptor activity)//GO:0042802(identical protein binding)//GO:0005234(extracellular-glutamate-gated ion channel activity)//GO:0030165(PDZ domain binding)	GO:0043113(receptor clustering)//GO:0060079(excitatory postsynaptic potential)//GO:0043525(positive regulation of neuron apoptotic process)//GO:0007268(synaptic transmission)//GO:0006621(protein retention in ER lumen)//GO:0035235(ionotropic glutamate receptor signaling pathway)//GO:0071333(cellular response to glucose stimulus)//GO:0051649(establishment of localization in cell)//GO:0035249(synapt…
ZNF85	ENSG00000105750	protein_coding	+	chr19:21106027-21133503	3.82953	1.4764	1.95022	1.37509	0.00015	0.000384245	up	7639	HPF4|HTF1	MIM:603899|HGNC:HGNC:13160|Ensembl:ENSG00000105750|HPRD:04875|Vega:OTTHUMG00000182747	19	19p12	zinc finger protein 85		GO:0005622(intracellular)//GO:0005634(nucleus)	GO:0003676(nucleic acid binding)//GO:0003700(transcription factor activity, sequence-specific DNA binding)//GO:0000978(RNA polymerase II core promoter proximal region sequence-specific DNA binding)//GO:0003714(transcription corepressor activity)//GO:0046872(metal ion binding)//GO:0005515(protein binding)//GO:0003677(DNA binding)	GO:0006351(transcription, DNA-templated)//GO:0006355(regulation of transcription, DNA-templated)//GO:1903507(negative regulation of nucleic acid-templated transcription)
BET1	ENSG00000105829	protein_coding	-	chr7:93592073-93640425	15.4984	3.194	3.93381	2.27869	5e-05	0.000136014	up	10282	HBET1	MIM:605456|HGNC:HGNC:14562|Ensembl:ENSG00000105829|HPRD:16107|Vega:OTTHUMG00000023487	7	7q21.1-q22	Bet1 golgi vesicular membrane trafficking protein	hsa04130(SNARE interactions in vesicular transport)	GO:0016021(integral component of membrane)//GO:0030133(transport vesicle)//GO:0016020(membrane)//GO:0033116(endoplasmic reticulum-Golgi intermediate compartment membrane)//GO:0005789(endoplasmic reticulum membrane)//GO:0031985(Golgi cisterna)//GO:0000139(Golgi membrane)//GO:0005801(cis-Golgi network)	GO:0005515(protein binding)//GO:0019905(syntaxin binding)	GO:0061024(membrane organization)//GO:0044267(cellular protein metabolic process)//GO:0048208(COPII vesicle coating)//GO:0043687(post-translational protein modification)//GO:0018279(protein N-linked glycosylation via asparagine)//GO:0015031(protein transport)//GO:0048280(vesicle fusion with Golgi apparatus)//GO:0006888(ER to Golgi vesicle-mediated transport)
ITGB8	ENSG00000105855	protein_coding	+	chr7:20367921-20455377	8.18972	3.14677	2.21612	1.37994	5e-05	0.000136014	up	3696	-	MIM:604160|HGNC:HGNC:6163|Ensembl:ENSG00000105855|HPRD:05001|Vega:OTTHUMG00000023594	7	7p21.1	integrin subunit beta 8	hsa04151(PI3K-Akt signaling pathway)//hsa04510(Focal adhesion)//hsa04512(ECM-receptor interaction)//hsa04514(Cell adhesion molecules (CAMs))//hsa04810(Regulation of actin cytoskeleton)//hsa05410(Hypertrophic cardiomyopathy (HCM))//hsa05412(Arrhythmogenic right ventricular cardiomyopathy (ARVC))//hsa05414(Dilated cardiomyopathy)	GO:0005886(plasma membrane)//GO:0070062(extracellular exosome)//GO:0008305(integrin complex)//GO:0009986(cell surface)//GO:0034686(integrin alphav-beta8 complex)	GO:0004872(receptor activity)//GO:0005102(receptor binding)//GO:1990430(extracellular matrix protein binding)	GO:0010629(negative regulation of gene expression)//GO:0051216(cartilage development)//GO:0001573(ganglioside metabolic process)//GO:0060674(placenta blood vessel development)//GO:0030198(extracellular matrix organization)//GO:0010628(positive regulation of gene expression)//GO:0007155(cell adhesion)//GO:0007229(integrin-mediated signaling pathway)//GO:0007160(cell-matrix adhesion)
DUS4L	ENSG00000105865	protein_coding	+	chr7:106809405-107218968	3.2424	0.73607	2.44368	2.13915	0.00055	0.00128077	up	11062	DUS4|PP35	HGNC:HGNC:21517|Ensembl:ENSG00000105865|HPRD:17886|Vega:OTTHUMG00000154763	7	7q22.3	dihydrouridine synthase 4 like		GO:0005829(cytosol)	GO:0017150(tRNA dihydrouridine synthase activity)//GO:0050660(flavin adenine dinucleotide binding)	GO:0055114(oxidation-reduction process)//GO:0002943(tRNA dihydrouridine synthesis)
DNAH11	ENSG00000105877	protein_coding	+	chr7:21582832-21985702	9.2679	0.634305	6.28273	3.86899	5e-05	0.000136014	up	8701	CILD7|DNAHBL|DNAHC11|DNHBL|DPL11	MIM:603339|HGNC:HGNC:2942|Ensembl:ENSG00000105877|HPRD:09134|Vega:OTTHUMG00000152524	7	7p21	dynein, axonemal, heavy chain 11	hsa05016(Huntington's disease)	GO:0031512(motile primary cilium)//GO:0030286(dynein complex)//GO:0005737(cytoplasm)//GO:0005874(microtubule)	GO:0005524(ATP binding)//GO:0016887(ATPase activity)//GO:0003777(microtubule motor activity)	GO:0008152(metabolic process)//GO:0007507(heart development)//GO:0030317(sperm motility)//GO:0003341(cilium movement)//GO:0003356(regulation of cilium beat frequency)//GO:0007368(determination of left/right symmetry)
CBLL1	ENSG00000105879	protein_coding	+	chr7:107383261-107402112	12.5254	4.43281	2.48958	1.49856	5e-05	0.000136014	up	79872	HAKAI|RNF188	MIM:606872|HGNC:HGNC:21225|Ensembl:ENSG00000105879|HPRD:07590|Vega:OTTHUMG00000154809	7	7q22.3	Cbl proto-oncogene like 1, E3 ubiquitin protein ligase		GO:0016607(nuclear speck)//GO:0000151(ubiquitin ligase complex)	GO:0003676(nucleic acid binding)//GO:0008270(zinc ion binding)//GO:0004842(ubiquitin-protein transferase activity)//GO:0042802(identical protein binding)//GO:0061630(ubiquitin protein ligase activity)//GO:0016874(ligase activity)//GO:0005515(protein binding)	GO:0030155(regulation of cell adhesion)//GO:0016567(protein ubiquitination)//GO:0016337(single organismal cell-cell adhesion)//GO:0045807(positive regulation of endocytosis)//GO:0007162(negative regulation of cell adhesion)//GO:0030335(positive regulation of cell migration)
DLX5	ENSG00000105880	protein_coding	-	chr7:96649703-96654409	4.67243	0.976772	2.86954	2.25808	5e-05	0.000136014	up	1749	SHFM1D	MIM:600028|HGNC:HGNC:2918|Ensembl:ENSG00000105880|HPRD:02492|Vega:OTTHUMG00000154200	7	7q22	distal-less homeobox 5	hsa04550(Signaling pathways regulating pluripotency of stem cells)	GO:0005737(cytoplasm)//GO:0000790(nuclear chromatin)	GO:0001077(transcriptional activator activity, RNA polymerase II core promoter proximal region sequence-specific binding)//GO:0000978(RNA polymerase II core promoter proximal region sequence-specific DNA binding)//GO:0044212(transcription regulatory region DNA binding)//GO:0071837(HMG box domain binding)	GO:0030509(BMP signaling pathway)//GO:0042472(inner ear morphogenesis)//GO:0007411(axon guidance)//GO:0060021(palate development)//GO:0030326(embryonic limb morphogenesis)//GO:0001958(endochondral ossification)//GO:0071773(cellular response to BMP stimulus)//GO:0045669(positive regulation of osteoblast differentiation)//GO:0001501(skeletal system development)//GO:1901522(positive regulation of tr…
STEAP1B	ENSG00000105889	protein_coding	-	chr7:22459062-22705152	2.12721	0.419025	2.20377	2.34386	0.0006	0.00138733	up	256227	-	HGNC:HGNC:41907|Ensembl:ENSG00000105889|Vega:OTTHUMG00000152529	7	7p15.3	STEAP family member 1B		GO:0016021(integral component of membrane)	GO:0008823(cupric reductase activity)//GO:0052851(ferric-chelate reductase (NADPH) activity)	GO:0015677(copper ion import)
ATP6V0A4	ENSG00000105929	protein_coding	-	chr7:138391039-138666064	1.48814	0	2.48814	inf	0.0004	0.000954907	up	50617	A4|ATP6N1B|ATP6N2|RDRTA2|RTA1C|RTADR|STV1|VPH1|VPP2	MIM:605239|HGNC:HGNC:866|Ensembl:ENSG00000105929|HPRD:05576|Vega:OTTHUMG00000157122	7	7q34	ATPase H+ transporting V0 subunit a4	hsa00190(Oxidative phosphorylation)//	GO:0016471(vacuolar proton-transporting V-type ATPase complex)//GO:0005768(endosome)//GO:0005886(plasma membrane)//GO:0070062(extracellular exosome)//GO:0045177(apical part of cell)//GO:0010008(endosome membrane)//GO:0000220(vacuolar proton-transporting V-type ATPase, V0 domain)//GO:0016021(integral component of membrane)//GO:0005765(lysosomal membrane)//GO:0031526(brush border membrane)//GO:0030…	GO:0005515(protein binding)//GO:0046961(proton-transporting ATPase activity, rotational mechanism)//GO:0051117(ATPase binding)	GO:0015986(ATP synthesis coupled proton transport)//GO:0015992(proton transport)//GO:0033572(transferrin transport)//GO:0006885(regulation of pH)//GO:0008286(insulin receptor signaling pathway)//GO:0007588(excretion)//GO:0001503(ossification)//GO:0045454(cell redox homeostasis)//GO:0006879(cellular iron ion homeostasis)//GO:0015991(ATP hydrolysis coupled proton transport)//GO:0007035(vacuolar aci…
ADAP1	ENSG00000105963	protein_coding	-	chr7:937539-1015235	3.01866	1.3811	1.68773	1.12809	0.00205	0.00427248	up	11033	CENTA1|GCS1L|p42IP4	MIM:608114|HGNC:HGNC:16486|Ensembl:ENSG00000105963|HPRD:09733|Vega:OTTHUMG00000023380	7	7p22.3	ArfGAP with dual PH domains 1		GO:0005886(plasma membrane)//GO:0005634(nucleus)//GO:0005737(cytoplasm)	GO:0005096(GTPase activator activity)//GO:0046872(metal ion binding)//GO:0005515(protein binding)//GO:0043533(inositol 1,3,4,5 tetrakisphosphate binding)	GO:0007166(cell surface receptor signaling pathway)//GO:0043087(regulation of GTPase activity)//GO:0043547(positive regulation of GTPase activity)
TFEC	ENSG00000105967	protein_coding	-	chr7:115575201-115799950	1.27311	0.552582	1.46408	1.2041	0.02855	0.0461814	up	22797	TCFEC|TFE-C|TFEC-L|TFECL|bHLHe34|hTFEC-L	MIM:604732|HGNC:HGNC:11754|Ensembl:ENSG00000105967|HPRD:05294|Vega:OTTHUMG00000023518	7	7q31.2	transcription factor EC		GO:0005654(nucleoplasm)//GO:0005737(cytoplasm)	GO:0003700(transcription factor activity, sequence-specific DNA binding)//GO:0003714(transcription corepressor activity)//GO:0046983(protein dimerization activity)//GO:0005515(protein binding)//GO:0003677(DNA binding)//GO:0003713(transcription coactivator activity)	GO:0034605(cellular response to heat)//GO:0006351(transcription, DNA-templated)//GO:0006355(regulation of transcription, DNA-templated)//GO:1903507(negative regulation of nucleic acid-templated transcription)
ABHD11	ENSG00000106077	protein_coding	-	chr7:73150423-73153197	7.3456	1.62884	3.17463	2.17304	5e-05	0.000136014	up	83451	PP1226|WBSCR21	HGNC:HGNC:16407|Ensembl:ENSG00000106077|HPRD:15658|Vega:OTTHUMG00000130029	7	7q11.23	abhydrolase domain containing 11		GO:0005739(mitochondrion)//GO:0005575(cellular_component)	GO:0003674(molecular_function)//GO:0016787(hydrolase activity)	GO:0008152(metabolic process)//GO:0008150(biological_process)
STX1A	ENSG00000106089	protein_coding	-	chr7:73095298-73134002	7.53363	1.97439	2.86904	1.93194	5e-05	0.000136014	up	6804	HPC-1|P35-1|STX1|SYN1A	MIM:186590|HGNC:HGNC:11433|Ensembl:ENSG00000106089|HPRD:01721|Vega:OTTHUMG00000137422	7	7q11.23	syntaxin 1A	hsa04130(SNARE interactions in vesicular transport)//hsa04721(Synaptic vesicle cycle)//hsa04911(Insulin secretion)//hsa05031(Amphetamine addiction)	GO:0016021(integral component of membrane)//GO:0008076(voltage-gated potassium channel complex)//GO:0005576(extracellular region)//GO:0043005(neuron projection)//GO:0012505(endomembrane system)//GO:0031201(SNARE complex)//GO:0005886(plasma membrane)//GO:0005829(cytosol)//GO:0042641(actomyosin)//GO:0070044(synaptobrevin 2-SNAP-25-syntaxin-1a complex)//GO:0008021(synaptic vesicle)//GO:0030054(cell …	GO:0019900(kinase binding)//GO:0043008(ATP-dependent protein binding)//GO:0019855(calcium channel inhibitor activity)//GO:0019904(protein domain specific binding)//GO:0047485(protein N-terminus binding)//GO:0046982(protein heterodimerization activity)//GO:0030674(protein binding, bridging)//GO:0044325(ion channel binding)//GO:0019869(chloride channel inhibitor activity)//GO:0000149(SNARE binding)…	GO:0045956(positive regulation of calcium ion-dependent exocytosis)//GO:0010807(regulation of synaptic vesicle priming)//GO:0048278(vesicle docking)//GO:0044281(small molecule metabolic process)//GO:0016081(synaptic vesicle docking)//GO:0017157(regulation of exocytosis)//GO:0033605(positive regulation of catecholamine secretion)//GO:0010701(positive regulation of norepinephrine secretion)//GO:000…
GARS	ENSG00000106105	protein_coding	+	chr7:30536236-30673649	41.0097	8.81004	4.28232	2.21874	5e-05	0.000136014	up	2617	CMT2D|DSMAV|GlyRS|HMN5|SMAD1	MIM:600287|HGNC:HGNC:4162|Ensembl:ENSG00000106105|HPRD:02617|Vega:OTTHUMG00000152769	7	7p15	glycyl-tRNA synthetase	hsa00970(Aminoacyl-tRNA biosynthesis)	GO:0070062(extracellular exosome)//GO:0030424(axon)//GO:0005829(cytosol)//GO:0005759(mitochondrial matrix)//GO:0005654(nucleoplasm)//GO:0005737(cytoplasm)//GO:0030141(secretory granule)	GO:0005524(ATP binding)//GO:0004820(glycine-tRNA ligase activity)//GO:0046983(protein dimerization activity)	GO:0006426(glycyl-tRNA aminoacylation)//GO:0010467(gene expression)//GO:0006418(tRNA aminoacylation for protein translation)//GO:0015966(diadenosine tetraphosphate biosynthetic process)
CYP3A5	ENSG00000106258	protein_coding	-	chr7:99214568-99336131	5.60877	0.728983	3.82235	2.94373	5e-05	0.000136014	up	1577	CP35|CYPIIIA5|P450PCN3|PCN3	MIM:605325|HGNC:HGNC:2638|Ensembl:ENSG00000106258|HPRD:05617|Vega:OTTHUMG00000156724	7	7q21.1	cytochrome P450 family 3 subfamily A member 5	hsa00140(Steroid hormone biosynthesis)//hsa00830(Retinol metabolism)//hsa00980(Metabolism of xenobiotics by cytochrome P450)//hsa00982(Drug metabolism - cytochrome P450)//	GO:0043231(intracellular membrane-bounded organelle)//GO:0005789(endoplasmic reticulum membrane)	GO:0005506(iron ion binding)//GO:0070330(aromatase activity)//GO:0020037(heme binding)//GO:0016491(oxidoreductase activity)//GO:0004497(monooxygenase activity)//GO:0019825(oxygen binding)	GO:0044281(small molecule metabolic process)//GO:0070989(oxidative demethylation)//GO:0042737(drug catabolic process)//GO:0006805(xenobiotic metabolic process)//GO:0009822(alkaloid catabolic process)//GO:0008202(steroid metabolic process)
SNX8	ENSG00000106266	protein_coding	-	chr7:2291404-2420380	13.1852	2.94679	3.59411	2.1617	5e-05	0.000136014	up	29886	Mvp1	MIM:614905|HGNC:HGNC:14972|Ensembl:ENSG00000106266|HPRD:11592|Vega:OTTHUMG00000151512	7	7p22.3	sorting nexin 8		GO:0019898(extrinsic component of membrane)//GO:0031901(early endosome membrane)//GO:0043231(intracellular membrane-bounded organelle)//GO:0030904(retromer complex)	GO:0035091(phosphatidylinositol binding)//GO:0005515(protein binding)//GO:0042802(identical protein binding)	GO:0006897(endocytosis)//GO:0016050(vesicle organization)//GO:0006886(intracellular protein transport)//GO:0034498(early endosome to Golgi transport)
TAF6	ENSG00000106290	protein_coding	-	chr7:99690350-99726118	24.6084	9.50005	2.43888	1.37314	5e-05	0.000136014	up	6878	MGC:8964|TAF(II)70|TAF(II)80|TAF2E|TAFII-70|TAFII-80|TAFII70|TAFII80|TAFII85	MIM:602955|HGNC:HGNC:11540|Ensembl:ENSG00000106290|HPRD:11807|Vega:OTTHUMG00000154771	7	7q22.1	TATA-box binding protein associated factor 6	hsa03022(Basal transcription factors)//hsa05168(Herpes simplex infection)	GO:0005669(transcription factor TFIID complex)//GO:0033276(transcription factor TFTC complex)//GO:0005654(nucleoplasm)//GO:0005634(nucleus)//GO:0071339(MLL1 complex)//GO:0005737(cytoplasm)	GO:0046982(protein heterodimerization activity)//GO:0005515(protein binding)//GO:0003677(DNA binding)//GO:0003700(transcription factor activity, sequence-specific DNA binding)	GO:0006366(transcription from RNA polymerase II promoter)//GO:0045786(negative regulation of cell cycle)//GO:0010467(gene expression)//GO:0006352(DNA-templated transcription, initiation)//GO:0006367(transcription initiation from RNA polymerase II promoter)//GO:0008285(negative regulation of cell proliferation)//GO:0006368(transcription elongation from RNA polymerase II promoter)//GO:0006355(regul…
AIMP2	ENSG00000106305	protein_coding	+	chr7:6048875-6098861	6.04251	1.41233	2.91938	2.09707	5e-05	0.000136014	up	7965	JTV-1|JTV1|P38|PRO0992	MIM:600859|HGNC:HGNC:20609|Ensembl:ENSG00000106305|HPRD:02915|Vega:OTTHUMG00000122077	7	7p22	aminoacyl tRNA synthetase complex-interacting multifunctional protein 2		GO:0016020(membrane)//GO:0005634(nucleus)//GO:0005829(cytosol)	GO:0005515(protein binding)	GO:0006418(tRNA aminoacylation for protein translation)//GO:0044281(small molecule metabolic process)//GO:1901216(positive regulation of neuron death)//GO:0031398(positive regulation of protein ubiquitination)//GO:0010467(gene expression)//GO:0001887(selenium compound metabolic process)//GO:0060510(Type II pneumocyte differentiation)//GO:0008285(negative regulation of cell proliferation)//GO:0034…
SERPINE1	ENSG00000106366	protein_coding	+	chr7:100770369-100782547	70.2838	33.9538	2.03937	1.04962	5e-05	0.000136014	up	5054	PAI|PAI-1|PAI1|PLANH1	MIM:173360|HGNC:HGNC:8583|Ensembl:ENSG00000106366|HPRD:01418|Vega:OTTHUMG00000157107	7	7q22.1	serpin peptidase inhibitor, clade E (nexin, plasminogen activator inhibitor type 1), member 1	hsa04066(HIF-1 signaling pathway)//hsa04115(p53 signaling pathway)//hsa04390(Hippo signaling pathway)//hsa04610(Complement and coagulation cascades)//	GO:0005886(plasma membrane)//GO:0070062(extracellular exosome)//GO:0005576(extracellular region)//GO:0031093(platelet alpha granule lumen)//GO:0031012(extracellular matrix)//GO:0005615(extracellular space)	GO:0005102(receptor binding)//GO:0002020(protease binding)//GO:0005515(protein binding)//GO:0004867(serine-type endopeptidase inhibitor activity)	GO:0030168(platelet activation)//GO:0050829(defense response to Gram-negative bacterium)//GO:0014912(negative regulation of smooth muscle cell migration)//GO:0030194(positive regulation of blood coagulation)//GO:0007179(transforming growth factor beta receptor signaling pathway)//GO:0010469(regulation of receptor activity)//GO:0007623(circadian rhythm)//GO:2000352(negative regulation of endotheli…
C1GALT1	ENSG00000106392	protein_coding	+	chr7:7196564-7288282	11.3377	3.2638	2.89359	1.7965	5e-05	0.000136014	up	56913	C1GALT|T-synthase	MIM:610555|HGNC:HGNC:24337|Ensembl:ENSG00000106392|HPRD:16631|Vega:OTTHUMG00000151912	7	7p21.3	core 1 synthase, glycoprotein-N-acetylgalactosamine 3-beta-galactosyltransferase 1	hsa00512(Mucin type O-Glycan biosynthesis)//	GO:0016021(integral component of membrane)//GO:0000139(Golgi membrane)	GO:0016263(glycoprotein-N-acetylgalactosamine 3-beta-galactosyltransferase activity)//GO:0005515(protein binding)//GO:0046872(metal ion binding)	GO:0060576(intestinal epithelial cell development)//GO:0044267(cellular protein metabolic process)//GO:0006493(protein O-linked glycosylation)//GO:0016266(O-glycan processing)//GO:0016267(O-glycan processing, core 1)//GO:0043687(post-translational protein modification)//GO:0001822(kidney development)//GO:0001525(angiogenesis)
RPA3	ENSG00000106399	protein_coding	-	chr7:7676148-8133902	13.8406	1.95501	5.02218	2.82366	0.00295	0.00596985	up	6119	REPA3|RP-A p14	MIM:179837|HGNC:HGNC:10291|HPRD:01567	7	7p22	replication protein A3	hsa03030(DNA replication)//hsa03420(Nucleotide excision repair)//hsa03430(Mismatch repair)//hsa03440(Homologous recombination)//hsa03460(Fanconi anemia pathway)	GO:0005654(nucleoplasm)//GO:0005634(nucleus)//GO:0005662(DNA replication factor A complex)	GO:0003697(single-stranded DNA binding)//GO:0005515(protein binding)//GO:0003684(damaged DNA binding)//GO:0003677(DNA binding)	GO:0036297(interstrand cross-link repair)//GO:0033683(nucleotide-excision repair, DNA incision)//GO:0006260(DNA replication)//GO:0042276(error-prone translesion synthesis)//GO:0070911(global genome nucleotide-excision repair)//GO:0006310(DNA recombination)//GO:0006284(base-excision repair)//GO:0000082(G1/S transition of mitotic cell cycle)//GO:0000724(double-strand break repair via homologous rec…
CLDN15	ENSG00000106404	protein_coding	-	chr7:100875372-100882101	4.85842	1.83054	2.06972	1.40822	5e-05	0.000136014	up	24146	-	MIM:615778|HGNC:HGNC:2036|Ensembl:ENSG00000106404|HPRD:13065|Vega:OTTHUMG00000150512	7	7q11.22	claudin 15	hsa04514(Cell adhesion molecules (CAMs))//hsa04530(Tight junction)//hsa04670(Leukocyte transendothelial migration)//hsa05160(Hepatitis C)	GO:0005923(bicellular tight junction)//GO:0005886(plasma membrane)//GO:0016328(lateral plasma membrane)//GO:0016021(integral component of membrane)	GO:0005198(structural molecule activity)//GO:0042802(identical protein binding)	GO:0070830(bicellular tight junction assembly)//GO:0034329(cell junction assembly)//GO:0016338(calcium-independent cell-cell adhesion via plasma membrane cell-adhesion molecules)//GO:0045216(cell-cell junction organization)//GO:0006811(ion transport)
GLCCI1	ENSG00000106415	protein_coding	+	chr7:7676148-8133902	9.03623	2.30663	3.03518	1.96994	5e-05	0.000136014	up	113263	FAM117C|GCTR|GIG18|TSSN1	MIM:614283|HGNC:HGNC:18713|Ensembl:ENSG00000106415|HPRD:17043|Vega:OTTHUMG00000151984	7	7p21.3	glucocorticoid induced 1		GO:0005737(cytoplasm)
SLC1A1	ENSG00000106688	protein_coding	+	chr9:4490443-4666674	3.13918	0.550466	2.66964	2.51166	5e-05	0.000136014	up	6505	DCBXA|EAAC1|EAAT3|SCZD18	MIM:133550|HGNC:HGNC:10939|Ensembl:ENSG00000106688|HPRD:00597|Vega:OTTHUMG00000019468	9	9p24	solute carrier family 1 member 1	hsa04724(Glutamatergic synapse)//hsa04974(Protein digestion and absorption)	GO:0016021(integral component of membrane)//GO:0005887(integral component of plasma membrane)//GO:0016020(membrane)//GO:0005886(plasma membrane)//GO:0070062(extracellular exosome)//GO:0016324(apical plasma membrane)	GO:0005313(L-glutamate transmembrane transporter activity)//GO:0015501(glutamate:sodium symporter activity)//GO:0033229(cysteine transmembrane transporter activity)//GO:0017153(sodium:dicarboxylate symporter activity)//GO:0005515(protein binding)//GO:0016595(glutamate binding)	GO:1903712(cysteine transmembrane transport)//GO:0051938(L-glutamate import)//GO:0051260(protein homooligomerization)//GO:0042883(cysteine transport)//GO:0007268(synaptic transmission)//GO:0089711(L-glutamate transmembrane transport)//GO:0014047(glutamate secretion)//GO:0006835(dicarboxylic acid transport)//GO:0010460(positive regulation of heart rate)//GO:0070779(D-aspartate import)//GO:0055085(…
C5	ENSG00000106804	protein_coding	-	chr9:123714615-123812554	7.21825	2.25648	2.52366	1.67758	5e-05	0.000136014	up	727	C5D|C5a|C5b|CPAMD4|ECLZB	MIM:120900|HGNC:HGNC:1331|Ensembl:ENSG00000106804|HPRD:00405|Vega:OTTHUMG00000020579	9	9q33-q34	complement component 5	hsa04610(Complement and coagulation cascades)//hsa05020(Prion diseases)//hsa05133(Pertussis)//hsa05150(Staphylococcus aureus infection)//hsa05168(Herpes simplex infection)//hsa05322(Systemic lupus erythematosus)	GO:0070062(extracellular exosome)//GO:0005576(extracellular region)//GO:0005615(extracellular space)//GO:0005579(membrane attack complex)	GO:0005102(receptor binding)//GO:0005515(protein binding)//GO:0008009(chemokine activity)//GO:0004866(endopeptidase inhibitor activity)	GO:0006957(complement activation, alternative pathway)//GO:0098779(mitophagy in response to mitochondrial depolarization)//GO:0090197(positive regulation of chemokine secretion)//GO:0045087(innate immune response)//GO:0006958(complement activation, classical pathway)//GO:0019835(cytolysis)//GO:0000187(activation of MAPK activity)//GO:0060326(cell chemotaxis)//GO:0045766(positive regulation of ang…
OGN	ENSG00000106809	protein_coding	-	chr9:95059639-95432547	73.3842	30.3722	2.37102	1.27272	5e-05	0.000136014	up	4969	OG|OIF|SLRR3A	MIM:602383|HGNC:HGNC:8126|Ensembl:ENSG00000106809|HPRD:03856|Vega:OTTHUMG00000020224	9	9q22	osteoglycin		GO:0070062(extracellular exosome)//GO:0005576(extracellular region)//GO:0005796(Golgi lumen)//GO:1903561(extracellular vesicle)//GO:0043202(lysosomal lumen)//GO:0005578(proteinaceous extracellular matrix)//GO:0031012(extracellular matrix)//GO:0005615(extracellular space)	GO:0008201(heparin binding)//GO:0008083(growth factor activity)//GO:0005515(protein binding)//GO:0048495(Roundabout binding)	GO:0007409(axonogenesis)//GO:0044281(small molecule metabolic process)//GO:0050770(regulation of axonogenesis)//GO:0048846(axon extension involved in axon guidance)//GO:0042339(keratan sulfate metabolic process)//GO:0018146(keratan sulfate biosynthetic process)//GO:0005975(carbohydrate metabolic process)//GO:0042340(keratan sulfate catabolic process)//GO:0030203(glycosaminoglycan metabolic proces…
PTGR1	ENSG00000106853	protein_coding	-	chr9:114287438-114393569	21.897	10.822	1.93681	1.01676	5e-05	0.000136014	up	22949	LTB4DH|PGR1|ZADH3	MIM:601274|HGNC:HGNC:18429|Ensembl:ENSG00000106853|HPRD:03173|Vega:OTTHUMG00000020493	9	9q31.3	prostaglandin reductase 1		GO:0070062(extracellular exosome)//GO:0005737(cytoplasm)	GO:0032440(2-alkenal reductase [NAD(P)] activity)//GO:0047522(15-oxoprostaglandin 13-oxidase activity)//GO:0016491(oxidoreductase activity)//GO:0008270(zinc ion binding)//GO:0036132(13-prostaglandin reductase activity)	GO:0055114(oxidation-reduction process)//GO:0006691(leukotriene metabolic process)//GO:0019371(cyclooxygenase pathway)//GO:0019369(arachidonic acid metabolic process)//GO:0009636(response to toxic substance)//GO:0044281(small molecule metabolic process)//GO:2001300(lipoxin metabolic process)
DNM1	ENSG00000106976	protein_coding	+	chr9:130928342-131017527	34.6005	14.8799	2.24186	1.21742	5e-05	0.000136014	up	1759	DNM|EIEE31	MIM:602377|HGNC:HGNC:2972|Ensembl:ENSG00000106976|HPRD:03851|Vega:OTTHUMG00000020733	9	9q34	dynamin 1		GO:0005886(plasma membrane)//GO:0043209(myelin sheath)//GO:0001917(photoreceptor inner segment)//GO:0005794(Golgi apparatus)//GO:0008021(synaptic vesicle)//GO:0043196(varicosity)//GO:0030117(membrane coat)//GO:0070062(extracellular exosome)//GO:0005874(microtubule)	GO:0050998(nitric-oxide synthase binding)//GO:0032403(protein complex binding)//GO:0019901(protein kinase binding)//GO:0003924(GTPase activity)//GO:0042802(identical protein binding)//GO:0031749(D2 dopamine receptor binding)//GO:0005525(GTP binding)//GO:0044822(poly(A) RNA binding)//GO:0046983(protein dimerization activity)//GO:0005515(protein binding)//GO:0008022(protein C-terminus binding)	GO:0006897(endocytosis)//GO:0008152(metabolic process)//GO:0006898(receptor-mediated endocytosis)//GO:0072583(clathrin-mediated endocytosis)//GO:0051932(synaptic transmission, GABAergic)//GO:0048013(ephrin receptor signaling pathway)//GO:0051262(protein tetramerization)//GO:1901998(toxin transport)//GO:0007032(endosome organization)//GO:0007411(axon guidance)//GO:1903423(positive regulation of sy…
PLGRKT	ENSG00000107020	protein_coding	-	chr9:5357972-5437878	2.74169	1.07027	1.80734	1.3571	0.00595	0.0112816	up	55848	AD025|C9orf46|MDS030|PLG-RKT|Plg-R(KT)	HGNC:HGNC:23633|Ensembl:ENSG00000107020|HPRD:12961|Vega:OTTHUMG00000019501	9	9p24.1	plasminogen receptor, C-terminal lysine transmembrane protein		GO:0005887(integral component of plasma membrane)//GO:0005739(mitochondrion)	GO:0005515(protein binding)	GO:0006954(inflammatory response)//GO:0010756(positive regulation of plasminogen activation)//GO:0006935(chemotaxis)
CA9	ENSG00000107159	protein_coding	+	chr9:35658300-35681156	8.00827	1.72319	3.30798	2.21641	5e-05	0.000136014	up	768	CAIX|MN	MIM:603179|HGNC:HGNC:1383|Ensembl:ENSG00000107159|HPRD:04417|Vega:OTTHUMG00000021029	9	9p13.3	carbonic anhydrase IX	hsa00910(Nitrogen metabolism)	GO:0016323(basolateral plasma membrane)//GO:0005730(nucleolus)//GO:0005886(plasma membrane)//GO:0031528(microvillus membrane)//GO:0016021(integral component of membrane)	GO:0004089(carbonate dehydratase activity)//GO:0008270(zinc ion binding)	GO:0015701(bicarbonate transport)//GO:0044281(small molecule metabolic process)//GO:0042493(response to drug)//GO:0006730(one-carbon metabolic process)//GO:0071456(cellular response to hypoxia)//GO:0033574(response to testosterone)//GO:0002009(morphogenesis of an epithelium)//GO:0046903(secretion)//GO:0061418(regulation of transcription from RNA polymerase II promoter in response to hypoxia)
EXOSC3	ENSG00000107371	protein_coding	-	chr9:37510888-38069210	21.299	6.70508	2.89406	1.66746	5e-05	0.000136014	up	51010	CGI-102|PCH1B|RRP40|Rrp40p|bA3J10.7|hRrp-40|p10	MIM:606489|HGNC:HGNC:17944|Ensembl:ENSG00000107371|HPRD:16220|Vega:OTTHUMG00000019932	9	9p11	exosome component 3	hsa03018(RNA degradation)	GO:0000176(nuclear exosome (RNase complex))//GO:0000177(cytoplasmic exosome (RNase complex))//GO:0035327(transcriptionally active chromatin)//GO:0005829(cytosol)//GO:0000178(exosome (RNase complex))//GO:0005730(nucleolus)//GO:0005634(nucleus)//GO:0005737(cytoplasm)	GO:0003723(RNA binding)//GO:0004532(exoribonuclease activity)//GO:0005515(protein binding)//GO:0000175(3'-5'-exoribonuclease activity)	GO:0034475(U4 snRNA 3'-end processing)//GO:0071038(nuclear polyadenylation-dependent tRNA catabolic process)//GO:0043488(regulation of mRNA stability)//GO:0010467(gene expression)//GO:0045830(positive regulation of isotype switching)//GO:0045190(isotype switching)//GO:0034427(nuclear-transcribed mRNA catabolic process, exonucleolytic, 3'-5')//GO:0000288(nuclear-transcribed mRNA catabolic process,…
TRDMT1	ENSG00000107614	protein_coding	-	chr10:17184252-17244053	5.2184	1.72455	2.28236	1.59739	5e-05	0.000136014	up	1787	DMNT2|DNMT2|MHSAIIP|PUMET|RNMT1	MIM:602478|HGNC:HGNC:2977|HPRD:16001	10	10p15.1	tRNA aspartic acid methyltransferase 1		GO:0005654(nucleoplasm)//GO:0005737(cytoplasm)	GO:0003723(RNA binding)//GO:0003886(DNA (cytosine-5-)-methyltransferase activity)//GO:0008168(methyltransferase activity)//GO:0008175(tRNA methyltransferase activity)	GO:0006400(tRNA modification)//GO:0030488(tRNA methylation)//GO:0010467(gene expression)//GO:0090116(C-5 methylation of cytosine)//GO:0001975(response to amphetamine)//GO:0032259(methylation)//GO:0008033(tRNA processing)
GDF10	ENSG00000107623	protein_coding	-	chr10:48425814-48438976	22.4787	7.88852	2.64146	1.51073	5e-05	0.000136014	up	2662	BMP-3b|BMP3B	MIM:601361|HGNC:HGNC:4215|Ensembl:ENSG00000266524|HPRD:03218|Vega:OTTHUMG00000188319	10	10q11.22	growth differentiation factor 10		GO:0005615(extracellular space)	GO:0008083(growth factor activity)//GO:0005160(transforming growth factor beta receptor binding)//GO:0005125(cytokine activity)	GO:0030509(BMP signaling pathway)//GO:0010862(positive regulation of pathway-restricted SMAD protein phosphorylation)//GO:0001501(skeletal system development)//GO:0060395(SMAD protein signal transduction)//GO:0045668(negative regulation of osteoblast differentiation)//GO:0001649(osteoblast differentiation)//GO:0048468(cell development)//GO:0043408(regulation of MAPK cascade)//GO:0007179(transform…
NSMCE4A	ENSG00000107672	protein_coding	-	chr10:123716602-123734732	36.4939	17.4319	2.03419	1.06592	5e-05	0.000136014	up	54780	C10orf86|NS4EA|NSE4A	MIM:612987|HGNC:HGNC:25935|Ensembl:ENSG00000107672|HPRD:16585|Vega:OTTHUMG00000019180	10	10q26.13	NSE4 homolog A, SMC5-SMC6 complex component		GO:0005654(nucleoplasm)//GO:0000781(chromosome, telomeric region)//GO:0030915(Smc5-Smc6 complex)	GO:0005515(protein binding)	GO:0044267(cellular protein metabolic process)//GO:2001022(positive regulation of response to DNA damage stimulus)//GO:0006310(DNA recombination)//GO:0043687(post-translational protein modification)//GO:0016925(protein sumoylation)//GO:0006281(DNA repair)
PALD1	ENSG00000107719	protein_coding	+	chr10:72238576-72328205	11.7668	5.43269	1.98468	1.11498	5e-05	0.000136014	up	27143	KIAA1274|PALD	MIM:614656|HGNC:HGNC:23530|Ensembl:ENSG00000107719|HPRD:11419|Vega:OTTHUMG00000018411	10	10q22.1	phosphatase domain containing, paladin 1		GO:0005634(nucleus)//GO:0005829(cytosol)	GO:0005515(protein binding)//GO:0004725(protein tyrosine phosphatase activity)	GO:0035335(peptidyl-tyrosine dephosphorylation)
MINPP1	ENSG00000107789	protein_coding	+	chr10:89264222-89313218	7.55206	1.34217	3.65134	2.4923	5e-05	0.000136014	up	9562	HIPER1|MINPP2|MIPP	MIM:605391|HGNC:HGNC:7102|Ensembl:ENSG00000107789|HPRD:05652|Vega:OTTHUMG00000018678	10	10q23	multiple inositol-polyphosphate phosphatase 1	hsa00010(Glycolysis / Gluconeogenesis)//hsa00562(Inositol phosphate metabolism)//	GO:0005783(endoplasmic reticulum)//GO:0005788(endoplasmic reticulum lumen)//GO:0070062(extracellular exosome)	GO:0003993(acid phosphatase activity)//GO:0052826(inositol hexakisphosphate 2-phosphatase activity)//GO:0008969(phosphohistidine phosphatase activity)//GO:0034417(bisphosphoglycerate 3-phosphatase activity)	GO:0044281(small molecule metabolic process)//GO:0016311(dephosphorylation)//GO:0006797(polyphosphate metabolic process)//GO:0043647(inositol phosphate metabolic process)//GO:0001503(ossification)//GO:0030282(bone mineralization)
KAZALD1	ENSG00000107821	protein_coding	+	chr10:102820998-102827891	6.30974	1.1293	3.43293	2.48216	5e-05	0.000136014	up	81621	BONO1|FKSG28|FKSG40|IGFBP-rP10	MIM:609208|HGNC:HGNC:25460|HPRD:13755	10	10q24.31	Kazal type serine peptidase inhibitor domain 1		GO:0005614(interstitial matrix)	GO:0005520(insulin-like growth factor binding)	GO:0001503(ossification)//GO:0030198(extracellular matrix organization)//GO:0007275(multicellular organism development)//GO:0001558(regulation of cell growth)//GO:0030154(cell differentiation)
CPEB3	ENSG00000107864	protein_coding	-	chr10:93806448-94050844	5.35219	2.1193	2.03642	1.33654	5e-05	0.000136014	up	22849	-	MIM:610606|HGNC:HGNC:21746|Ensembl:ENSG00000107864|HPRD:16745|Vega:OTTHUMG00000018756	10	10q23.32	cytoplasmic polyadenylation element binding protein 3	hsa04114(Oocyte meiosis)//hsa04320(Dorso-ventral axis formation)//hsa04914(Progesterone-mediated oocyte maturation)	GO:0043005(neuron projection)//GO:0030425(dendrite)//GO:0045202(synapse)//GO:0030014(CCR4-NOT complex)//GO:0097440(apical dendrite)//GO:0005634(nucleus)//GO:1990124(messenger ribonucleoprotein complex)//GO:0005737(cytoplasm)	GO:0008135(translation factor activity, RNA binding)//GO:0005515(protein binding)//GO:0043022(ribosome binding)//GO:0003730(mRNA 3'-UTR binding)//GO:0000166(nucleotide binding)//GO:0035925(mRNA 3'-UTR AU-rich region binding)//GO:0003723(RNA binding)//GO:0044822(poly(A) RNA binding)//GO:0000900(translation repressor activity, nucleic acid binding)//GO:0035613(RNA stem-loop binding)	GO:0007616(long-term memory)//GO:0000122(negative regulation of transcription from RNA polymerase II promoter)//GO:1900153(positive regulation of nuclear-transcribed mRNA catabolic process, deadenylation-dependent decay)//GO:2000766(negative regulation of cytoplasmic translation)//GO:1900365(positive regulation of mRNA polyadenylation)//GO:0017148(negative regulation of translation)//GO:0006412(t…
FBXL15	ENSG00000107872	protein_coding	+	chr10:104162373-104182893	3.8859	1.10024	2.32635	1.82043	5e-05	0.000136014	up	79176	FBXO37|Fbl15|JET|PSD	MIM:610287|HGNC:HGNC:28155|Ensembl:ENSG00000107872|Vega:OTTHUMG00000018957	10	10q24.32	F-box and leucine-rich repeat protein 15		GO:0005737(cytoplasm)//GO:0019005(SCF ubiquitin ligase complex)	GO:0004842(ubiquitin-protein transferase activity)//GO:0005515(protein binding)	GO:0031146(SCF-dependent proteasomal ubiquitin-dependent protein catabolic process)//GO:0030513(positive regulation of BMP signaling pathway)//GO:0016567(protein ubiquitination)//GO:0009953(dorsal/ventral pattern formation)//GO:0030282(bone mineralization)//GO:0000086(G2/M transition of mitotic cell cycle)
MTPAP	ENSG00000107951	protein_coding	-	chr10:30598729-30663377	7.1379	2.28521	2.47713	1.64317	5e-05	0.000136014	up	55149	PAPD1|SPAX4	MIM:613669|HGNC:HGNC:25532|Ensembl:ENSG00000107951|HPRD:15097|Vega:OTTHUMG00000017895	10	10p11.23	mitochondrial poly(A) polymerase		GO:0043231(intracellular membrane-bounded organelle)//GO:0005739(mitochondrion)	GO:0042803(protein homodimerization activity)//GO:0005524(ATP binding)//GO:0000287(magnesium ion binding)//GO:0042802(identical protein binding)//GO:0004652(polynucleotide adenylyltransferase activity)//GO:0030145(manganese ion binding)//GO:0044822(poly(A) RNA binding)//GO:0002134(UTP binding)//GO:0005515(protein binding)	GO:0071044(histone mRNA catabolic process)//GO:0006378(mRNA polyadenylation)//GO:0006351(transcription, DNA-templated)
TADA2A	ENSG00000108264	protein_coding	+	chr17:35766964-35839835	11.5556	4.92342	2.11965	1.23086	5e-05	0.000136014	up	6871	ADA2|ADA2A|KL04P|TADA2L|hADA2	MIM:602276|HGNC:HGNC:11531|Ensembl:ENSG00000276234|HPRD:03784|Vega:OTTHUMG00000188469	17	17q12-q21	transcriptional adaptor 2A		GO:0000125(PCAF complex)//GO:0005634(nucleus)//GO:0005694(chromosome)	GO:0008270(zinc ion binding)//GO:0003712(transcription cofactor activity)//GO:0003700(transcription factor activity, sequence-specific DNA binding)//GO:0003682(chromatin binding)//GO:0005515(protein binding)//GO:0003677(DNA binding)//GO:0004402(histone acetyltransferase activity)//GO:0003713(transcription coactivator activity)	GO:0006325(chromatin organization)//GO:0006338(chromatin remodeling)//GO:0006366(transcription from RNA polymerase II promoter)//GO:0035066(positive regulation of histone acetylation)//GO:0016573(histone acetylation)//GO:0006357(regulation of transcription from RNA polymerase II promoter)//GO:0043966(histone H3 acetylation)
PSMD3	ENSG00000108344	protein_coding	+	chr17:38137049-38154213	21.1608	10.3305	1.95585	1.03449	5e-05	0.000136014	up	5709	P58|RPN3|S3|TSTA2	HGNC:HGNC:9560|Ensembl:ENSG00000108344|HPRD:10170|Vega:OTTHUMG00000133251	17	17q21.1	proteasome 26S subunit, non-ATPase 3	hsa03050(Proteasome)//hsa05169(Epstein-Barr virus infection)	GO:0070062(extracellular exosome)//GO:0016020(membrane)//GO:0000502(proteasome complex)//GO:0005829(cytosol)//GO:0008541(proteasome regulatory particle, lid subcomplex)//GO:0005654(nucleoplasm)//GO:0005634(nucleus)//GO:0022624(proteasome accessory complex)//GO:0005737(cytoplasm)	GO:0030234(enzyme regulator activity)//GO:0005515(protein binding)	GO:0002474(antigen processing and presentation of peptide antigen via MHC class I)//GO:0043488(regulation of mRNA stability)//GO:0034641(cellular nitrogen compound metabolic process)//GO:0048011(neurotrophin TRK receptor signaling pathway)//GO:0043066(negative regulation of apoptotic process)//GO:0033209(tumor necrosis factor-mediated signaling pathway)//GO:0051437(positive regulation of ubiquiti…
DHX40	ENSG00000108406	protein_coding	+	chr17:57642885-57685706	20.1328	7.54541	2.473	1.41588	5e-05	0.000136014	up	79665	ARG147|DDX40|PAD	MIM:607570|HGNC:HGNC:18018|Ensembl:ENSG00000108406|HPRD:06346|Vega:OTTHUMG00000179401	17	17q23.1	DEAH-box helicase 40		GO:0005730(nucleolus)	GO:0003676(nucleic acid binding)//GO:0008026(ATP-dependent helicase activity)//GO:0005524(ATP binding)//GO:0004386(helicase activity)//GO:0044822(poly(A) RNA binding)//GO:0004004(ATP-dependent RNA helicase activity)	GO:0006810(transport)//GO:0008152(metabolic process)//GO:0006396(RNA processing)
RECQL5	ENSG00000108469	protein_coding	-	chr17:73584138-73704142	23.8962	10.396	2.18464	1.20075	5e-05	0.000136014	up	9400	RECQ5	MIM:603781|HGNC:HGNC:9950|Ensembl:ENSG00000108469|HPRD:04806|Vega:OTTHUMG00000179795	17	17q25	RecQ like helicase 5		GO:0005654(nucleoplasm)//GO:0005634(nucleus)//GO:0016591(DNA-directed RNA polymerase II, holoenzyme)//GO:0005737(cytoplasm)	GO:0005524(ATP binding)//GO:0003678(DNA helicase activity)//GO:0003676(nucleic acid binding)//GO:0000993(RNA polymerase II core binding)//GO:0008026(ATP-dependent helicase activity)	GO:0034244(negative regulation of transcription elongation from RNA polymerase II promoter)//GO:0007067(mitotic nuclear division)//GO:0006259(DNA metabolic process)//GO:0006310(DNA recombination)//GO:0051301(cell division)//GO:0051304(chromosome separation)//GO:0008152(metabolic process)//GO:0032508(DNA duplex unwinding)//GO:0006260(DNA replication)//GO:0006281(DNA repair)
CCDC47	ENSG00000108588	protein_coding	-	chr17:61780191-61896677	65.7204	29.0045	2.22368	1.18007	5e-05	0.000136014	up	57003	GK001|MSTP041	HGNC:HGNC:24856|Ensembl:ENSG00000108588|HPRD:17041|Vega:OTTHUMG00000178933	17	17q23.3	coiled-coil domain containing 47		GO:0005783(endoplasmic reticulum)//GO:0005791(rough endoplasmic reticulum)//GO:0016021(integral component of membrane)//GO:0016020(membrane)	GO:0044822(poly(A) RNA binding)//GO:0005515(protein binding)//GO:0005509(calcium ion binding)	GO:0055074(calcium ion homeostasis)//GO:0007029(endoplasmic reticulum organization)//GO:0009791(post-embryonic development)//GO:0001649(osteoblast differentiation)//GO:0006983(ER overload response)//GO:0030433(ER-associated ubiquitin-dependent protein catabolic process)
MED31	ENSG00000108590	protein_coding	-	chr17:6481467-6554954	2.50714	0.86506	1.88044	1.53517	0.0459	0.0702287	up	51003	3110004H13Rik|CGI-125|Soh1	HGNC:HGNC:24260|Ensembl:ENSG00000108590|HPRD:14382|Vega:OTTHUMG00000102051	17	17p13.1	mediator complex subunit 31		GO:0070847(core mediator complex)//GO:0005654(nucleoplasm)//GO:0016592(mediator complex)//GO:0000151(ubiquitin ligase complex)	GO:0061630(ubiquitin protein ligase activity)//GO:0005515(protein binding)//GO:0001104(RNA polymerase II transcription cofactor activity)//GO:0003713(transcription coactivator activity)	GO:0060173(limb development)//GO:0010467(gene expression)//GO:0048147(negative regulation of fibroblast proliferation)//GO:0016567(protein ubiquitination)//GO:0006367(transcription initiation from RNA polymerase II promoter)//GO:0006357(regulation of transcription from RNA polymerase II promoter)
DRG2	ENSG00000108591	protein_coding	+	chr17:17991199-18011285	25.5606	11.863	2.06488	1.10745	5e-05	0.000136014	up	1819	-	MIM:602986|HGNC:HGNC:3030|Ensembl:ENSG00000108591|HPRD:04286|Vega:OTTHUMG00000059399	17	17p11.2	developmentally regulated GTP binding protein 2		GO:0005654(nucleoplasm)//GO:0043231(intracellular membrane-bounded organelle)//GO:0005739(mitochondrion)//GO:0005737(cytoplasm)//GO:0016020(membrane)	GO:0005515(protein binding)//GO:0005525(GTP binding)	GO:0007165(signal transduction)
B9D1	ENSG00000108641	protein_coding	-	chr17:19240866-19290553	7.68159	3.25232	2.04161	1.23994	0.00115	0.00251848	up	27077	B9|EPPB9|MKS9|MKSR1	MIM:614144|HGNC:HGNC:24123|Ensembl:ENSG00000108641|HPRD:16866|Vega:OTTHUMG00000059586	17	17p11.2	B9 protein domain 1		GO:0036038(TCTN-B9D complex)//GO:0016020(membrane)//GO:0035869(ciliary transition zone)//GO:0005813(centrosome)//GO:0005829(cytosol)//GO:0036064(ciliary basal body)	GO:0008158(hedgehog receptor activity)	GO:0060563(neuroepithelial cell differentiation)//GO:0042384(cilium assembly)//GO:0042733(embryonic digit morphogenesis)//GO:0032880(regulation of protein localization)//GO:0001944(vasculature development)//GO:0006996(organelle organization)//GO:0060271(cilium morphogenesis)//GO:0043010(camera-type eye development)//GO:0001701(in utero embryonic development)//GO:0007224(smoothened signaling pathw…
PEX12	ENSG00000108733	protein_coding	-	chr17:33901813-34053436	2.96983	1.47711	1.60261	1.0076	0.0012	0.00261861	up	5193	PAF-3|PBD3A	MIM:601758|HGNC:HGNC:8854|Ensembl:ENSG00000108733|HPRD:03455|Vega:OTTHUMG00000132951	17	17q12	peroxisomal biogenesis factor 12	hsa04146(Peroxisome)	GO:0005777(peroxisome)//GO:0005778(peroxisomal membrane)//GO:1990429(peroxisomal importomer complex)//GO:0005779(integral component of peroxisomal membrane)	GO:0004842(ubiquitin-protein transferase activity)//GO:0008270(zinc ion binding)//GO:0005515(protein binding)//GO:0008022(protein C-terminus binding)	GO:0016558(protein import into peroxisome matrix)//GO:0007031(peroxisome organization)//GO:0006513(protein monoubiquitination)//GO:0006625(protein targeting to peroxisome)
MYH3	ENSG00000109063	protein_coding	-	chr17:10531842-10560626	3.66064	1.51615	1.85229	1.27168	0.0002	0.000503289	up	4621	DA2A|DA2B|DA8|HEMHC|MYHC-EMB|MYHSE1|SMHCE	MIM:160720|HGNC:HGNC:7573|Ensembl:ENSG00000109063|HPRD:01172|Vega:OTTHUMG00000130367	17	17p13.1	myosin, heavy chain 3, skeletal muscle, embryonic	hsa04530(Tight junction)	GO:0030017(sarcomere)//GO:0032982(myosin filament)//GO:0005859(muscle myosin complex)//GO:0070062(extracellular exosome)//GO:0005829(cytosol)	GO:0005524(ATP binding)//GO:0005516(calmodulin binding)//GO:0042623(ATPase activity, coupled)//GO:0000146(microfilament motor activity)//GO:0051015(actin filament binding)	GO:0007517(muscle organ development)//GO:0030049(muscle filament sliding)//GO:0030326(embryonic limb morphogenesis)//GO:0030048(actin filament-based movement)//GO:0045214(sarcomere organization)//GO:0003009(skeletal muscle contraction)//GO:0046034(ATP metabolic process)//GO:0060325(face morphogenesis)
TMEM33	ENSG00000109133	protein_coding	+	chr4:41937136-41962589	12.487	5.13965	2.19671	1.28069	5e-05	0.000136014	up	55161	1600019D15Rik|SHINC3	HGNC:HGNC:25541|Ensembl:ENSG00000109133|HPRD:07680|Vega:OTTHUMG00000099381	4	4p13	transmembrane protein 33		GO:0016021(integral component of membrane)//GO:0070062(extracellular exosome)//GO:0005635(nuclear envelope)//GO:0005643(nuclear pore)//GO:0042470(melanosome)//GO:0005783(endoplasmic reticulum)	GO:0017056(structural constituent of nuclear pore)//GO:0005515(protein binding)	GO:0071786(endoplasmic reticulum tubular network organization)//GO:0034613(cellular protein localization)//GO:0008150(biological_process)//GO:0051292(nuclear pore complex assembly)
TBC1D19	ENSG00000109680	protein_coding	+	chr4:26578058-26756973	10.8614	5.06642	1.95526	1.10017	5e-05	0.000136014	up	55296	-	HGNC:HGNC:25624|HPRD:07730	4	4p15.2	TBC1 domain family member 19			GO:0005096(GTPase activator activity)//GO:0005515(protein binding)	GO:1902017(regulation of cilium assembly)//GO:0043547(positive regulation of GTPase activity)
GLRB	ENSG00000109738	protein_coding	+	chr4:157997208-158093242	3.92117	0.476844	3.33222	3.0397	5e-05	0.000136014	up	2743	HKPX2	MIM:138492|HGNC:HGNC:4329|Ensembl:ENSG00000109738|HPRD:11751|Vega:OTTHUMG00000161954	4	4q31.3	glycine receptor beta	hsa04080(Neuroactive ligand-receptor interaction)	GO:0005886(plasma membrane)//GO:0005887(integral component of plasma membrane)//GO:0030054(cell junction)//GO:0045211(postsynaptic membrane)//GO:0016935(glycine-gated chloride channel complex)	GO:0016594(glycine binding)//GO:0016933(extracellular-glycine-gated ion channel activity)//GO:0016934(extracellular-glycine-gated chloride channel activity)//GO:0008144(drug binding)//GO:0005515(protein binding)	GO:0060013(righting reflex)//GO:0007628(adult walking behavior)//GO:0001964(startle response)//GO:1902476(chloride transmembrane transport)//GO:0007340(acrosome reaction)//GO:0060012(synaptic transmission, glycinergic)//GO:0007268(synaptic transmission)//GO:0042391(regulation of membrane potential)//GO:0007218(neuropeptide signaling pathway)//GO:0043200(response to amino acid)//GO:0007601(visual …
KLF3	ENSG00000109787	protein_coding	+	chr4:38614321-38702663	30.6598	12.8999	2.2777	1.24899	5e-05	0.000136014	up	51274	BKLF	MIM:609392|HGNC:HGNC:16516|Ensembl:ENSG00000109787|HPRD:13920|Vega:OTTHUMG00000097821	4	4p14	Kruppel-like factor 3 (basic)	hsa05202(Transcriptional misregulation in cancer)	GO:0005634(nucleus)	GO:0046872(metal ion binding)//GO:0005515(protein binding)//GO:0003677(DNA binding)//GO:0003700(transcription factor activity, sequence-specific DNA binding)	GO:0007275(multicellular organism development)//GO:0006351(transcription, DNA-templated)//GO:0006355(regulation of transcription, DNA-templated)//GO:1901653(cellular response to peptide)
PPARGC1A	ENSG00000109819	protein_coding	-	chr4:23562545-24474394	10.6911	3.1128	2.84261	1.78012	5e-05	0.000136014	up	10891	LEM6|PGC-1(alpha)|PGC-1alpha|PGC-1v|PGC1|PGC1A|PPARGC1	MIM:604517|HGNC:HGNC:9237|Ensembl:ENSG00000109819|HPRD:05155|Vega:OTTHUMG00000097747	4	4p15.1	PPARG coactivator 1 alpha	hsa04152(AMPK signaling pathway)//	GO:1990844(interfibrillar mitochondrion)//GO:0005665(DNA-directed RNA polymerase II, core complex)//GO:0005719(nuclear euchromatin)//GO:1990843(subsarcolemmal mitochondrion)//GO:0097440(apical dendrite)//GO:0016605(PML body)//GO:0022626(cytosolic ribosome)//GO:0005654(nucleoplasm)//GO:0005634(nucleus)//GO:0043025(neuronal cell body)	GO:0030331(estrogen receptor binding)//GO:0043014(alpha-tubulin binding)//GO:0031490(chromatin DNA binding)//GO:0031625(ubiquitin protein ligase binding)//GO:1990841(promoter-specific chromatin binding)//GO:0003723(RNA binding)//GO:0030374(ligand-dependent nuclear receptor transcription coactivator activity)//GO:0001104(RNA polymerase II transcription cofactor activity)//GO:0050681(androgen recep…	GO:0042594(response to starvation)//GO:0071392(cellular response to estradiol stimulus)//GO:0008209(androgen metabolic process)//GO:0008380(RNA splicing)//GO:0097067(cellular response to thyroid hormone stimulus)//GO:0071372(cellular response to follicle-stimulating hormone stimulus)//GO:0001678(cellular glucose homeostasis)//GO:0045820(negative regulation of glycolytic process)//GO:0022904(respi…
CCDC34	ENSG00000109881	protein_coding	-	chr11:27352373-27385415	1.38694	0.43246	1.66632	1.68127	0.00205	0.00427248	up	91057	L15|NY-REN-41|RAMA3	MIM:612324|HGNC:HGNC:25079|Ensembl:ENSG00000109881|HPRD:14868|Vega:OTTHUMG00000166211	11	11p14.1	coiled-coil domain containing 34
SC5D	ENSG00000109929	protein_coding	+	chr11:121163161-121179403	13.0826	6.34243	1.91798	1.04454	5e-05	0.000136014	up	6309	ERG3|S5DES|SC5DL	MIM:602286|HGNC:HGNC:10547|HPRD:09078	11	11q23.3	sterol-C5-desaturase	hsa00100(Steroid biosynthesis)//	GO:0016021(integral component of membrane)//GO:0005789(endoplasmic reticulum membrane)	GO:0005506(iron ion binding)//GO:0000248(C-5 sterol desaturase activity)//GO:0016491(oxidoreductase activity)	GO:0055114(oxidation-reduction process)//GO:0044281(small molecule metabolic process)//GO:0033490(cholesterol biosynthetic process via lathosterol)//GO:0006695(cholesterol biosynthetic process)//GO:0033489(cholesterol biosynthetic process via desmosterol)//GO:0006629(lipid metabolic process)//GO:0006633(fatty acid biosynthetic process)
UNC93B1	ENSG00000110057	protein_coding	-	chr11:67758574-67772452	6.79391	2.31276	2.35269	1.55463	5e-05	0.000136014	up	81622	IIAE1|UNC93|UNC93B|Unc-93B1	MIM:608204|HGNC:HGNC:13481|Ensembl:ENSG00000110057|HPRD:12191|Vega:OTTHUMG00000167472	11	11q13	unc-93 homolog B1 (C. elegans)		GO:0005768(endosome)//GO:0016021(integral component of membrane)//GO:0005789(endoplasmic reticulum membrane)//GO:0005764(lysosome)//GO:0000139(Golgi membrane)//GO:0005783(endoplasmic reticulum)//GO:0032009(early phagosome)		GO:0034138(toll-like receptor 3 signaling pathway)//GO:0034162(toll-like receptor 9 signaling pathway)//GO:0045087(innate immune response)//GO:0002224(toll-like receptor signaling pathway)//GO:0051607(defense response to virus)//GO:0006886(intracellular protein transport)//GO:0002250(adaptive immune response)//GO:0034154(toll-like receptor 7 signaling pathway)//GO:0019886(antigen processing and p…
DCPS	ENSG00000110063	protein_coding	+	chr11:126152959-126225482	6.2248	1.80747	2.57342	1.78405	5e-05	0.000136014	up	28960	ARS|DCS1|HINT-5|HINT5|HSL1|HSPC015	MIM:610534|HGNC:HGNC:29812|Ensembl:ENSG00000110063|HPRD:16787|Vega:OTTHUMG00000165829	11	11q24.2	decapping enzyme, scavenger	hsa03018(RNA degradation)	GO:0005654(nucleoplasm)//GO:0005634(nucleus)//GO:0005739(mitochondrion)//GO:0005737(cytoplasm)//GO:0005829(cytosol)	GO:0050072(m7G(5')pppN diphosphatase activity)//GO:0005515(protein binding)//GO:0000340(RNA 7-methylguanosine cap binding)	GO:0045292(mRNA cis splicing, via spliceosome)//GO:0000290(deadenylation-dependent decapping of nuclear-transcribed mRNA)//GO:0010467(gene expression)//GO:0036245(cellular response to menadione)//GO:0000288(nuclear-transcribed mRNA catabolic process, deadenylation-dependent decay)//GO:0043069(negative regulation of programmed cell death)//GO:0043928(exonucleolytic nuclear-transcribed mRNA catabol…
KIAA1377	ENSG00000110318	protein_coding	+	chr11:101761404-101871789	13.5323	5.63661	2.18972	1.2635	5e-05	0.000136014	up
PTPMT1	ENSG00000110536	protein_coding	+	chr11:47487495-47606114	6.46796	2.04856	2.44967	1.6587	5e-05	0.000136014	up	114971	DUSP23|MOSP|PLIP|PNAS-129	MIM:609538|HGNC:HGNC:26965	11	11p11.2	protein tyrosine phosphatase, mitochondrial 1		GO:0005739(mitochondrion)//GO:0005634(nucleus)//GO:0031305(integral component of mitochondrial inner membrane)	GO:0008138(protein tyrosine/serine/threonine phosphatase activity)//GO:0004725(protein tyrosine phosphatase activity)//GO:0005515(protein binding)//GO:0008962(phosphatidylglycerophosphatase activity)//GO:0004439(phosphatidylinositol-4,5-bisphosphate 5-phosphatase activity)	GO:0006644(phospholipid metabolic process)//GO:0044281(small molecule metabolic process)//GO:0032049(cardiolipin biosynthetic process)//GO:0046474(glycerophospholipid biosynthetic process)//GO:0006655(phosphatidylglycerol biosynthetic process)//GO:0035335(peptidyl-tyrosine dephosphorylation)
PTPN5	ENSG00000110786	protein_coding	-	chr11:18714668-18814268	3.16994	1.05336	2.03079	1.58945	5e-05	0.000136014	up	84867	PTPSTEP|STEP|STEP61	MIM:176879|HGNC:HGNC:9657|Ensembl:ENSG00000110786|HPRD:01472|Vega:OTTHUMG00000134304	11	11p15.1	protein tyrosine phosphatase, non-receptor type 5	hsa04010(MAPK signaling pathway)	GO:0016021(integral component of membrane)//GO:0043204(perikaryon)//GO:0005789(endoplasmic reticulum membrane)//GO:0030424(axon)//GO:0005829(cytosol)//GO:1990635(proximal dendrite)	GO:0051019(mitogen-activated protein kinase binding)//GO:0001784(phosphotyrosine binding)//GO:0035254(glutamate receptor binding)//GO:0005515(protein binding)//GO:0004725(protein tyrosine phosphatase activity)	GO:1903955(positive regulation of protein targeting to mitochondrion)//GO:0010976(positive regulation of neuron projection development)//GO:1900273(positive regulation of long-term synaptic potentiation)//GO:2001025(positive regulation of response to drug)//GO:0042493(response to drug)//GO:0002092(positive regulation of receptor internalization)//GO:1903492(response to acetylsalicylate)//GO:00331…
KRT18	ENSG00000111057	protein_coding	+	chr12:53290976-53346686	3.33857	0.940528	2.23577	1.82769	5e-05	0.000136014	up	3875	CK-18|CYK18|K18	MIM:148070|HGNC:HGNC:6430|Ensembl:ENSG00000111057|HPRD:01020|Vega:OTTHUMG00000169882	12	12q13	keratin 18, type I	hsa05130(Pathogenic Escherichia coli infection)	GO:0070062(extracellular exosome)//GO:0034451(centriolar satellite)//GO:0005815(microtubule organizing center)//GO:0045095(keratin filament)//GO:0048471(perinuclear region of cytoplasm)//GO:0005882(intermediate filament)//GO:0005730(nucleolus)//GO:0071944(cell periphery)//GO:0005737(cytoplasm)	GO:0044822(poly(A) RNA binding)//GO:0005198(structural molecule activity)//GO:0005515(protein binding)//GO:0097110(scaffold protein binding)	GO:0043000(Golgi to plasma membrane CFTR protein transport)//GO:0009653(anatomical structure morphogenesis)//GO:0045104(intermediate filament cytoskeleton organization)//GO:0097191(extrinsic apoptotic signaling pathway)//GO:0007049(cell cycle)//GO:0016032(viral process)//GO:0043066(negative regulation of apoptotic process)//GO:0097284(hepatocyte apoptotic process)//GO:0033209(tumor necrosis facto…
PPM1H	ENSG00000111110	protein_coding	-	chr12:63037761-63328915	6.13803	2.062	2.33117	1.57374	5e-05	0.000136014	up	57460	ARHCL1|NERPP-2C|URCC2	MIM:616016|HGNC:HGNC:18583|Ensembl:ENSG00000111110|Vega:OTTHUMG00000169990	12	12q14.1	protein phosphatase, Mg2+/Mn2+ dependent 1H		GO:0005634(nucleus)//GO:0005737(cytoplasm)	GO:0004722(protein serine/threonine phosphatase activity)//GO:0004721(phosphoprotein phosphatase activity)	GO:0006470(protein dephosphorylation)
SLC6A12	ENSG00000111181	protein_coding	-	chr12:299242-323736	1.66354	0.080955	2.46406	4.361	0.0368	0.057749	up	6539	BGT-1|BGT1|GAT2	MIM:603080|HGNC:HGNC:11045|Ensembl:ENSG00000111181|HPRD:04358|Vega:OTTHUMG00000090309	12	12p13	solute carrier family 6 (neurotransmitter transporter), member 12		GO:0043005(neuron projection)//GO:0016021(integral component of membrane)//GO:0005887(integral component of plasma membrane)//GO:0005886(plasma membrane)	GO:0005328(neurotransmitter:sodium symporter activity)//GO:0005332(gamma-aminobutyric acid:sodium symporter activity)//GO:0005515(protein binding)	GO:0015812(gamma-aminobutyric acid transport)//GO:0007268(synaptic transmission)//GO:0006865(amino acid transport)//GO:0071474(cellular hyperosmotic response)//GO:0009992(cellular water homeostasis)//GO:0055085(transmembrane transport)//GO:0006810(transport)//GO:0007269(neurotransmitter secretion)//GO:0006836(neurotransmitter transport)//GO:0010033(response to organic substance)//GO:0006811(ion t…
MAGOHB	ENSG00000111196	protein_coding	-	chr12:10758611-10766222	11.2984	2.82394	3.21616	2.00034	5e-05	0.000136014	up	55110	MGN2|mago|magoh	HGNC:HGNC:25504|Ensembl:ENSG00000111196|HPRD:08544|Vega:OTTHUMG00000168407	12	12p13.2	mago homolog B, exon junction complex core component	hsa03013(RNA transport)//hsa03015(mRNA surveillance pathway)//hsa03040(Spliceosome)	GO:0071013(catalytic step 2 spliceosome)//GO:0005634(nucleus)//GO:0035145(exon-exon junction complex)//GO:0043025(neuronal cell body)	GO:0044822(poly(A) RNA binding)//GO:0005515(protein binding)	GO:0006397(mRNA processing)//GO:0051028(mRNA transport)//GO:0000184(nuclear-transcribed mRNA catabolic process, nonsense-mediated decay)//GO:0008380(RNA splicing)
TRPV4	ENSG00000111199	protein_coding	-	chr12:110220889-110271241	21.2056	1.50522	8.86373	3.8164	5e-05	0.000136014	up	59341	BCYM3|CMT2C|HMSN2C|OTRPC4|SMAL|SPSMA|SSQTL1|TRP12|VRL2|VROAC	MIM:605427|HGNC:HGNC:18083|Ensembl:ENSG00000111199|HPRD:05667|Vega:OTTHUMG00000169277	12	12q24.1	transient receptor potential cation channel subfamily V member 4	hsa04750(Inflammatory mediator regulation of TRP channels)	GO:0016021(integral component of membrane)//GO:0005929(cilium)//GO:0030027(lamellipodium)//GO:0009986(cell surface)//GO:0030175(filopodium)//GO:0005881(cytoplasmic microtubule)//GO:0005886(plasma membrane)//GO:0005829(cytosol)//GO:0005912(adherens junction)//GO:0016324(apical plasma membrane)//GO:0031410(cytoplasmic vesicle)//GO:0030864(cortical actin cytoskeleton)//GO:0032587(ruffle membrane)//G…	GO:0043014(alpha-tubulin binding)//GO:0005034(osmosensor activity)//GO:0005080(protein kinase C binding)//GO:0005524(ATP binding)//GO:0005515(protein binding)//GO:0005516(calmodulin binding)//GO:0005261(cation channel activity)//GO:0005216(ion channel activity)//GO:0019901(protein kinase binding)//GO:0015275(stretch-activated, cation-selective, calcium channel activity)//GO:0051015(actin filament…	GO:0070509(calcium ion import)//GO:0007015(actin filament organization)//GO:0007204(positive regulation of cytosolic calcium ion concentration)//GO:0047484(regulation of response to osmotic stress)//GO:0097497(blood vessel endothelial cell delamination)//GO:0071470(cellular response to osmotic stress)//GO:0007043(cell-cell junction assembly)//GO:0006816(calcium ion transport)//GO:0031117(positive…
PRR4	ENSG00000111215	protein_coding	-	chr12:10977558-11324224	43.0172	18.9871	2.20228	1.17989	5e-05	0.000136014	up	11272	LPRP|PROL4	MIM:605359|HGNC:HGNC:18020|Ensembl:ENSG00000111215|HPRD:09248|Vega:OTTHUMG00000168522	12	12p13	proline rich 4 (lacrimal)		GO:0005615(extracellular space)		GO:0001895(retina homeostasis)//GO:0007601(visual perception)
GPN3	ENSG00000111231	protein_coding	-	chr12:110890288-110928190	6.54888	2.98561	1.89403	1.13322	0.00745	0.0138327	up	51184	ATPBD1C	HGNC:HGNC:30186|Ensembl:ENSG00000111231|HPRD:17498|Vega:OTTHUMG00000169524	12	12q24.11	GPN-loop GTPase 3		GO:0043234(protein complex)	GO:0005515(protein binding)//GO:0005525(GTP binding)//GO:0016787(hydrolase activity)	GO:0008152(metabolic process)
AKAP3	ENSG00000111254	protein_coding	-	chr12:4671369-4960277	4.6309	0.897425	2.96765	2.36743	0.0005	0.00117341	up	10566	AKAP 110|AKAP110|CT82|FSP95|HEL159|PRKA3|SOB1	MIM:604689|HGNC:HGNC:373|Ensembl:ENSG00000111254|HPRD:05256|Vega:OTTHUMG00000168226	12	12p13.3	A-kinase anchoring protein 3		GO:0001669(acrosomal vesicle)//GO:0005634(nucleus)//GO:0035686(sperm fibrous sheath)//GO:0005737(cytoplasm)//GO:0097228(sperm principal piece)	GO:0005515(protein binding)//GO:0051018(protein kinase A binding)	GO:0010738(regulation of protein kinase A signaling)//GO:0007338(single fertilization)//GO:0007340(acrosome reaction)//GO:0008104(protein localization)//GO:0007178(transmembrane receptor protein serine/threonine kinase signaling pathway)//GO:0006928(movement of cell or subcellular component)
MGP	ENSG00000111341	protein_coding	-	chr12:14956505-15059520	3235.42	1367.98	2.36411	1.2419	5e-05	0.000136014	up	4256	GIG36|MGLAP|NTI	MIM:154870|HGNC:HGNC:7060|Ensembl:ENSG00000111341|HPRD:01112|Vega:OTTHUMG00000168740	12	12p12.3	matrix Gla protein		GO:0005578(proteinaceous extracellular matrix)//GO:0031012(extracellular matrix)//GO:0070062(extracellular exosome)	GO:0005201(extracellular matrix structural constituent)//GO:0008147(structural constituent of bone)//GO:0005515(protein binding)//GO:0005509(calcium ion binding)	GO:0001503(ossification)//GO:0030500(regulation of bone mineralization)//GO:0001502(cartilage condensation)//GO:0030154(cell differentiation)
CPSF6	ENSG00000111605	protein_coding	+	chr12:69633316-69668138	27.7336	9.8197	2.65567	1.49788	5e-05	0.000136014	up	11052	CFIM|CFIM68|HPBRII-4|HPBRII-7	MIM:604979|HGNC:HGNC:13871|Ensembl:ENSG00000111605|Vega:OTTHUMG00000169340	12	12q15	cleavage and polyadenylation specific factor 6	hsa03015(mRNA surveillance pathway)	GO:0030529(intracellular ribonucleoprotein complex)//GO:0016020(membrane)//GO:0042382(paraspeckles)//GO:0005849(mRNA cleavage factor complex)//GO:0005654(nucleoplasm)//GO:0005634(nucleus)	GO:0003676(nucleic acid binding)//GO:0003723(RNA binding)//GO:0003729(mRNA binding)//GO:0000166(nucleotide binding)//GO:0044822(poly(A) RNA binding)//GO:0005515(protein binding)	GO:0006397(mRNA processing)//GO:0006378(mRNA polyadenylation)//GO:0051262(protein tetramerization)
ENO2	ENSG00000111674	protein_coding	+	chr12:6976282-7032861	58.4126	23.3294	2.44201	1.32413	5e-05	0.000136014	up	2026	HEL-S-279|NSE	MIM:131360|HGNC:HGNC:3353|Ensembl:ENSG00000111674|HPRD:00573|Vega:OTTHUMG00000168967	12	12p13	enolase 2 (gamma, neuronal)	hsa00010(Glycolysis / Gluconeogenesis)//	GO:0005886(plasma membrane)//GO:0043209(myelin sheath)//GO:0001917(photoreceptor inner segment)//GO:0043204(perikaryon)//GO:0005829(cytosol)//GO:0070062(extracellular exosome)//GO:0000015(phosphopyruvate hydratase complex)//GO:0005615(extracellular space)	GO:0004634(phosphopyruvate hydratase activity)//GO:0000287(magnesium ion binding)//GO:0005515(protein binding)	GO:0044281(small molecule metabolic process)//GO:0006096(glycolytic process)//GO:0006094(gluconeogenesis)//GO:0006006(glucose metabolic process)//GO:0005975(carbohydrate metabolic process)//GO:0061621(canonical glycolysis)
GOLT1B	ENSG00000111711	protein_coding	+	chr12:21654714-21671342	17.8707	6.04022	2.68041	1.56492	5e-05	0.000136014	up	51026	CGI-141|GCT2|GOT1|GOT1B|YMR292W	MIM:615078|HGNC:HGNC:20175|Ensembl:ENSG00000111711|HPRD:13035|Vega:OTTHUMG00000169133	12	12p12.1	golgi transport 1B		GO:0005783(endoplasmic reticulum)//GO:0016020(membrane)//GO:0016021(integral component of membrane)//GO:0000139(Golgi membrane)	GO:0004871(signal transducer activity)	GO:0015031(protein transport)//GO:0016192(vesicle-mediated transport)//GO:0043123(positive regulation of I-kappaB kinase/NF-kappaB signaling)//GO:0007165(signal transduction)
RIC8B	ENSG00000111785	protein_coding	+	chr12:106751435-107283090	13.1486	5.99415	2.02292	1.13328	5e-05	0.000136014	up	55188	RIC8|hSyn	MIM:609147|HGNC:HGNC:25555|Ensembl:ENSG00000111785|HPRD:16452|Vega:OTTHUMG00000144188	12	12q23.3	RIC8 guanine nucleotide exchange factor B		GO:0005813(centrosome)//GO:0005886(plasma membrane)//GO:0005938(cell cortex)//GO:0005737(cytoplasm)//GO:0005829(cytosol)	GO:0001965(G-protein alpha-subunit binding)//GO:0005096(GTPase activator activity)//GO:0005085(guanyl-nucleotide exchange factor activity)	GO:0008277(regulation of G-protein coupled receptor protein signaling pathway)//GO:0007186(G-protein coupled receptor signaling pathway)//GO:0043547(positive regulation of GTPase activity)
RNF8	ENSG00000112130	protein_coding	+	chr6:37321747-37362514	12.6986	3.20753	3.25573	1.98513	5e-05	0.000136014	up	9025	hRNF8	MIM:611685|HGNC:HGNC:10071|Ensembl:ENSG00000112130|HPRD:11521|Vega:OTTHUMG00000014620	6	6p21.3	ring finger protein 8, E3 ubiquitin protein ligase		GO:0035861(site of double-strand break)//GO:0030496(midbody)//GO:0000781(chromosome, telomeric region)//GO:0005654(nucleoplasm)//GO:0005634(nucleus)//GO:0005737(cytoplasm)//GO:0000151(ubiquitin ligase complex)	GO:0008270(zinc ion binding)//GO:0031625(ubiquitin protein ligase binding)//GO:0042803(protein homodimerization activity)//GO:0004842(ubiquitin-protein transferase activity)//GO:0003682(chromatin binding)//GO:0042393(histone binding)//GO:0016874(ligase activity)//GO:0005515(protein binding)	GO:0070535(histone H2A K63-linked ubiquitination)//GO:0034244(negative regulation of transcription elongation from RNA polymerase II promoter)//GO:0007067(mitotic nuclear division)//GO:0033522(histone H2A ubiquitination)//GO:0007286(spermatid development)//GO:0051865(protein autoubiquitination)//GO:0006974(cellular response to DNA damage stimulus)//GO:0036297(interstrand cross-link repair)//GO:00…
SAYSD1	ENSG00000112167	protein_coding	-	chr6:39071839-39082965	5.89079	1.60057	2.64972	1.87987	5e-05	0.000136014	up	55776	C6orf64	HGNC:HGNC:21025|Ensembl:ENSG00000112167|HPRD:12892|Vega:OTTHUMG00000014641	6	6p21.2	SAYSVFN motif domain containing 1		GO:0016021(integral component of membrane)//GO:0030659(cytoplasmic vesicle membrane)//GO:0043231(intracellular membrane-bounded organelle)
SIM1	ENSG00000112246	protein_coding	-	chr6:100832890-100912805	2.16089	0	3.16089	inf	5e-05	0.000136014	up	6492	bHLHe14	MIM:603128|HGNC:HGNC:10882|Ensembl:ENSG00000112246|HPRD:07049|Vega:OTTHUMG00000015275	6	6q16.3	single-minded family bHLH transcription factor 1		GO:0005634(nucleus)	GO:0000981(RNA polymerase II transcription factor activity, sequence-specific DNA binding)//GO:0046982(protein heterodimerization activity)//GO:0003677(DNA binding)//GO:0003700(transcription factor activity, sequence-specific DNA binding)	GO:0006357(regulation of transcription from RNA polymerase II promoter)//GO:0007399(nervous system development)//GO:0001657(ureteric bud development)//GO:0006351(transcription, DNA-templated)//GO:0030154(cell differentiation)
COL9A1	ENSG00000112280	protein_coding	-	chr6:70924763-71012786	4.47632	0	5.47632	inf	5e-05	0.000136014	up	1297	DJ149L1.1.2|EDM6|MED|STL4	MIM:120210|HGNC:HGNC:2217|Ensembl:ENSG00000112280|HPRD:00367|Vega:OTTHUMG00000014988	6	6q13	collagen type IX alpha 1	hsa04151(PI3K-Akt signaling pathway)//hsa04510(Focal adhesion)//hsa04512(ECM-receptor interaction)//hsa04974(Protein digestion and absorption)	GO:0005578(proteinaceous extracellular matrix)//GO:0005594(collagen type IX trimer)//GO:0005576(extracellular region)//GO:0005788(endoplasmic reticulum lumen)	GO:0030020(extracellular matrix structural constituent conferring tensile strength)//GO:0046872(metal ion binding)	GO:0007411(axon guidance)//GO:0022617(extracellular matrix disassembly)//GO:0030198(extracellular matrix organization)//GO:0009887(organ morphogenesis)//GO:0003417(growth plate cartilage development)//GO:0001894(tissue homeostasis)//GO:0030574(collagen catabolic process)//GO:0002062(chondrocyte differentiation)
GPLD1	ENSG00000112293	protein_coding	-	chr6:24403152-24537435	3.11367	0.738017	2.36688	2.07689	5e-05	0.000136014	up	2822	GPIPLD|GPIPLDM|PIGPLD|PIGPLD1|PLD	MIM:602515|HGNC:HGNC:4459|Ensembl:ENSG00000112293|HPRD:03946|Vega:OTTHUMG00000016104	6	6p22.1	glycosylphosphatidylinositol specific phospholipase D1	hsa00563(Glycosylphosphatidylinositol(GPI)-anchor biosynthesis)	GO:0070062(extracellular exosome)//GO:0005765(lysosomal membrane)//GO:0043231(intracellular membrane-bounded organelle)//GO:0005578(proteinaceous extracellular matrix)//GO:0005622(intracellular)//GO:0005615(extracellular space)//GO:0005737(cytoplasm)	GO:0004630(phospholipase D activity)//GO:0017080(sodium channel regulator activity)//GO:0004621(glycosylphosphatidylinositol phospholipase D activity)	GO:0008285(negative regulation of cell proliferation)//GO:0035774(positive regulation of insulin secretion involved in cellular response to glucose stimulus)//GO:0070633(transepithelial transport)//GO:0002042(cell migration involved in sprouting angiogenesis)//GO:0071397(cellular response to cholesterol)//GO:0002430(complement receptor mediated signaling pathway)//GO:0010595(positive regulation o…
PEX7	ENSG00000112357	protein_coding	+	chr6:137143716-137235075	4.35007	1.99414	1.78685	1.12527	5e-05	0.000136014	up	5191	PBD9B|PTS2R|RCDP1|RD	MIM:601757|HGNC:HGNC:8860|Ensembl:ENSG00000112357|HPRD:03454|Vega:OTTHUMG00000015650	6	6q23.3	peroxisomal biogenesis factor 7	hsa04146(Peroxisome)	GO:0005777(peroxisome)//GO:0005782(peroxisomal matrix)//GO:0005829(cytosol)	GO:0019899(enzyme binding)//GO:0005053(peroxisome matrix targeting signal-2 binding)//GO:0042803(protein homodimerization activity)	GO:0008611(ether lipid biosynthetic process)//GO:0007031(peroxisome organization)//GO:0001958(endochondral ossification)//GO:0006635(fatty acid beta-oxidation)//GO:0001764(neuron migration)//GO:0016558(protein import into peroxisome matrix)
FIG4	ENSG00000112367	protein_coding	+	chr6:110012498-110146631	11.4065	5.51162	1.90529	1.04931	5e-05	0.000136014	up	9896	ALS11|BTOP|CMT4J|KIAA0274|SAC3|YVS|dJ249I4.1	MIM:609390|HGNC:HGNC:16873|Ensembl:ENSG00000112367|HPRD:11073|Vega:OTTHUMG00000015352	6	6q21	FIG4 phosphoinositide 5-phosphatase		GO:0016021(integral component of membrane)//GO:0055037(recycling endosome)//GO:0010008(endosome membrane)//GO:0031901(early endosome membrane)//GO:0000139(Golgi membrane)//GO:0005783(endoplasmic reticulum)//GO:0031902(late endosome membrane)	GO:0043812(phosphatidylinositol-4-phosphate phosphatase activity)//GO:0042578(phosphoric ester hydrolase activity)//GO:0005515(protein binding)//GO:0004438(phosphatidylinositol-3-phosphatase activity)//GO:0043813(phosphatidylinositol-3,5-bisphosphate 5-phosphatase activity)	GO:0006644(phospholipid metabolic process)//GO:0008152(metabolic process)//GO:0031642(negative regulation of myelination)//GO:0010976(positive regulation of neuron projection development)//GO:0048666(neuron development)//GO:0016311(dephosphorylation)//GO:0036092(phosphatidylinositol-3-phosphate biosynthetic process)//GO:0007626(locomotory behavior)//GO:0006661(phosphatidylinositol biosynthetic pr…
SLC16A10	ENSG00000112394	protein_coding	+	chr6:111408780-111580237	3.47954	0.293776	3.46238	3.56611	5e-05	0.000136014	up	117247	MCT10|PRO0813|TAT1	MIM:607550|HGNC:HGNC:17027|Ensembl:ENSG00000112394|HPRD:09613|Vega:OTTHUMG00000015371	6	6q21	solute carrier family 16 member 10	hsa04919(Thyroid hormone signaling pathway)//hsa04974(Protein digestion and absorption)	GO:0016323(basolateral plasma membrane)//GO:0005886(plasma membrane)//GO:0005887(integral component of plasma membrane)//GO:0016021(integral component of membrane)	GO:0005215(transporter activity)//GO:0015349(thyroid hormone transmembrane transporter activity)//GO:0015173(aromatic amino acid transmembrane transporter activity)	GO:0070327(thyroid hormone transport)//GO:0015801(aromatic amino acid transport)//GO:0006865(amino acid transport)//GO:0055085(transmembrane transport)//GO:0006811(ion transport)//GO:0034220(ion transmembrane transport)
TBP	ENSG00000112592	protein_coding	+	chr6:170863389-170881958	4.02634	1.41874	2.07808	1.50486	5e-05	0.000136014	up	6908	GTF2D|GTF2D1|HDL4|SCA17|TFIID	MIM:600075|HGNC:HGNC:11588|Ensembl:ENSG00000112592|HPRD:02511|Vega:OTTHUMG00000016084	6	6q27	TATA-box binding protein	hsa03022(Basal transcription factors)//hsa05016(Huntington's disease)//hsa05166(HTLV-I infection)//hsa05168(Herpes simplex infection)//hsa05169(Epstein-Barr virus infection)//hsa05203(Viral carcinogenesis)	GO:0005672(transcription factor TFIIA complex)//GO:0005669(transcription factor TFIID complex)//GO:0005719(nuclear euchromatin)//GO:0005654(nucleoplasm)//GO:0001939(female pronucleus)//GO:0001940(male pronucleus)//GO:0005737(cytoplasm)	GO:0019899(enzyme binding)//GO:0003700(transcription factor activity, sequence-specific DNA binding)//GO:0000979(RNA polymerase II core promoter sequence-specific DNA binding)//GO:0000978(RNA polymerase II core promoter proximal region sequence-specific DNA binding)//GO:0044212(transcription regulatory region DNA binding)//GO:0070491(repressing transcription factor binding)//GO:0008134(transcript…	GO:0000183(chromatin silencing at rDNA)//GO:0045815(positive regulation of gene expression, epigenetic)//GO:0006367(transcription initiation from RNA polymerase II promoter)//GO:0006362(transcription elongation from RNA polymerase I promoter)//GO:0006360(transcription from RNA polymerase I promoter)//GO:0040029(regulation of gene expression, epigenetic)//GO:0010467(gene expression)//GO:0007283(sp…
GUCA1B	ENSG00000112599	protein_coding	-	chr6:42152138-42162654	2.34434	0.554849	2.15091	2.07902	0.00355	0.00707093	up	2979	GCAP2|GUCA2|RP48	MIM:602275|HGNC:HGNC:4679|HPRD:03783	6	6p21.1	guanylate cyclase activator 1B	hsa04744(Phototransduction)	GO:0001917(photoreceptor inner segment)//GO:0097381(photoreceptor disc membrane)	GO:0008048(calcium sensitive guanylate cyclase activator activity)//GO:0005509(calcium ion binding)	GO:0022400(regulation of rhodopsin mediated signaling pathway)//GO:0031284(positive regulation of guanylate cyclase activity)//GO:0007267(cell-cell signaling)//GO:0007168(receptor guanylyl cyclase signaling pathway)//GO:0016056(rhodopsin mediated signaling pathway)//GO:0007601(visual perception)//GO:0007603(phototransduction, visible light)//GO:0007589(body fluid secretion)
PTK7	ENSG00000112655	protein_coding	+	chr6:43044005-43129458	8.76078	3.73305	2.06226	1.23071	5e-05	0.000136014	up	5754	CCK-4|CCK4	MIM:601890|HGNC:HGNC:9618|Ensembl:ENSG00000112655|HPRD:03534|Vega:OTTHUMG00000014721	6	6p21.1-p12.2	protein tyrosine kinase 7 (inactive)		GO:0016021(integral component of membrane)//GO:0005887(integral component of plasma membrane)//GO:0005925(focal adhesion)//GO:0005911(cell-cell junction)	GO:0004672(protein kinase activity)//GO:0005524(ATP binding)//GO:0004713(protein tyrosine kinase activity)//GO:0005515(protein binding)//GO:1904929(coreceptor activity involved in Wnt signaling pathway, planar cell polarity pathway)	GO:0010976(positive regulation of neuron projection development)//GO:0090179(planar cell polarity pathway involved in neural tube closure)//GO:0071300(cellular response to retinoic acid)//GO:0031532(actin cytoskeleton reorganization)//GO:0045198(establishment of epithelial cell apical/basal polarity)//GO:0018108(peptidyl-tyrosine phosphorylation)//GO:0006468(protein phosphorylation)//GO:0003401(a…
VEGFA	ENSG00000112715	protein_coding	+	chr6:43737920-43754224	60.2399	28.5658	2.07131	1.07643	5e-05	0.000136014	up	7422	MVCD1|VEGF|VPF	MIM:192240|HGNC:HGNC:12680|Ensembl:ENSG00000112715|HPRD:01889|Vega:OTTHUMG00000014745	6	6p12	vascular endothelial growth factor A	hsa04014(Ras signaling pathway)//hsa04015(Rap1 signaling pathway)//hsa04060(Cytokine-cytokine receptor interaction)//hsa04066(HIF-1 signaling pathway)//hsa04150(mTOR signaling pathway)//hsa04151(PI3K-Akt signaling pathway)//hsa04370(VEGF signaling pathway)//hsa04510(Focal adhesion)//	GO:0005576(extracellular region)//GO:0009986(cell surface)//GO:0031093(platelet alpha granule lumen)//GO:0016020(membrane)//GO:0005578(proteinaceous extracellular matrix)//GO:0005615(extracellular space)//GO:0005737(cytoplasm)//GO:0030141(secretory granule)	GO:0008083(growth factor activity)//GO:0005125(cytokine activity)//GO:0042803(protein homodimerization activity)//GO:0005161(platelet-derived growth factor receptor binding)//GO:0008201(heparin binding)//GO:0001968(fibronectin binding)//GO:0042802(identical protein binding)//GO:0038191(neuropilin binding)//GO:0005172(vascular endothelial growth factor receptor binding)//GO:0048018(receptor agonis…	GO:0002042(cell migration involved in sprouting angiogenesis)//GO:0038091(positive regulation of cell proliferation by VEGF-activated platelet derived growth factor receptor signaling pathway)//GO:0010595(positive regulation of endothelial cell migration)//GO:0045766(positive regulation of angiogenesis)//GO:0030823(regulation of cGMP metabolic process)//GO:0061419(positive regulation of transcrip…
PCDHB2	ENSG00000112852	protein_coding	+	chr5:140474226-140476962	3.21133	0.895622	2.22161	1.84221	5e-05	0.000136014	up	56133	PCDH-BETA2	MIM:606328|HGNC:HGNC:8687|HPRD:07558	5	5q31	protocadherin beta 2		GO:0016021(integral component of membrane)//GO:0005887(integral component of plasma membrane)	GO:0005509(calcium ion binding)	GO:0007416(synapse assembly)//GO:0007156(homophilic cell adhesion via plasma membrane adhesion molecules)//GO:0007268(synaptic transmission)//GO:0007155(cell adhesion)//GO:0007399(nervous system development)//GO:0016339(calcium-dependent cell-cell adhesion via plasma membrane cell adhesion molecules)
CEP72	ENSG00000112877	protein_coding	+	chr5:612386-693510	6.87036	1.60144	3.02539	2.10101	5e-05	0.000136014	up	55722	-	MIM:616475|HGNC:HGNC:25547|Ensembl:ENSG00000112877|HPRD:07685|Vega:OTTHUMG00000161745	5	5p15.33	centrosomal protein 72kDa		GO:0005813(centrosome)//GO:0034451(centriolar satellite)//GO:0005829(cytosol)	GO:0005515(protein binding)//GO:0042802(identical protein binding)	GO:0007099(centriole replication)//GO:0033566(gamma-tubulin complex localization)//GO:0000278(mitotic cell cycle)//GO:0006996(organelle organization)//GO:0007051(spindle organization)//GO:1904779(regulation of protein localization to centrosome)//GO:0000086(G2/M transition of mitotic cell cycle)
TMCO6	ENSG00000113119	protein_coding	+	chr5:140018324-140042064	5.8461	1.52428	2.7121	1.93934	5e-05	0.000136014	up	55374	PRO1580	HGNC:HGNC:28814|Ensembl:ENSG00000113119|HPRD:15177|Vega:OTTHUMG00000129497	5	5q31.3	transmembrane and coiled-coil domains 6		GO:0016021(integral component of membrane)//GO:0005634(nucleus)//GO:0005737(cytoplasm)	GO:0005515(protein binding)//GO:0008565(protein transporter activity)	GO:0006606(protein import into nucleus)
PDE8B	ENSG00000113231	protein_coding	+	chr5:76506273-76916436	1.41673	0.381549	1.74929	1.89262	0.002	0.0041793	up	8622	ADSD|PPNAD3	MIM:603390|HGNC:HGNC:8794|Ensembl:ENSG00000113231|HPRD:04546|Vega:OTTHUMG00000102170	5	5q13.3	phosphodiesterase 8B	hsa00230(Purine metabolism)//hsa05032(Morphine addiction)	GO:0005575(cellular_component)//GO:0005829(cytosol)	GO:0004115(3',5'-cyclic-AMP phosphodiesterase activity)//GO:0046872(metal ion binding)//GO:0004114(3',5'-cyclic-nucleotide phosphodiesterase activity)	GO:0006198(cAMP catabolic process)//GO:0008542(visual learning)//GO:0090032(negative regulation of steroid hormone biosynthetic process)//GO:0001662(behavioral fear response)//GO:0009187(cyclic nucleotide metabolic process)//GO:0035106(operant conditioning)//GO:0046676(negative regulation of insulin secretion)//GO:0050885(neuromuscular process controlling balance)//GO:0007165(signal transduction)
CLK4	ENSG00000113240	protein_coding	-	chr5:178029664-178057616	25.04	10.5656	2.2515	1.24486	5e-05	0.000136014	up	57396	-	MIM:607969|HGNC:HGNC:13659|Ensembl:ENSG00000113240|HPRD:12140|Vega:OTTHUMG00000130893	5	5q35	CDC like kinase 4		GO:0005634(nucleus)	GO:0004674(protein serine/threonine kinase activity)//GO:0004672(protein kinase activity)//GO:0004712(protein serine/threonine/tyrosine kinase activity)//GO:0005524(ATP binding)//GO:0004713(protein tyrosine kinase activity)//GO:0005515(protein binding)	GO:0018108(peptidyl-tyrosine phosphorylation)//GO:0006468(protein phosphorylation)//GO:0046777(protein autophosphorylation)//GO:0043484(regulation of RNA splicing)
THBS4	ENSG00000113296	protein_coding	+	chr5:79287133-79379477	155.947	19.7454	7.56539	2.98146	5e-05	0.000136014	up	7060	TSP-4|TSP4	MIM:600715|HGNC:HGNC:11788|Ensembl:ENSG00000113296|HPRD:02836|Vega:OTTHUMG00000108173	5	5q13	thrombospondin 4	hsa04145(Phagosome)//hsa04151(PI3K-Akt signaling pathway)//hsa04510(Focal adhesion)//hsa04512(ECM-receptor interaction)//hsa05144(Malaria)	GO:0005604(basement membrane)//GO:0070062(extracellular exosome)//GO:0005576(extracellular region)//GO:0016529(sarcoplasmic reticulum)//GO:0031594(neuromuscular junction)//GO:0005783(endoplasmic reticulum)//GO:0031012(extracellular matrix)//GO:0005615(extracellular space)	GO:0008083(growth factor activity)//GO:0005518(collagen binding)//GO:0008201(heparin binding)//GO:0001968(fibronectin binding)//GO:0043237(laminin-1 binding)//GO:0005178(integrin binding)//GO:0005515(protein binding)//GO:0005509(calcium ion binding)	GO:0048771(tissue remodeling)//GO:0051260(protein homooligomerization)//GO:0090023(positive regulation of neutrophil chemotaxis)//GO:0007155(cell adhesion)//GO:0051451(myoblast migration)//GO:0071603(endothelial cell-cell adhesion)//GO:0006986(response to unfolded protein)//GO:0050731(positive regulation of peptidyl-tyrosine phosphorylation)//GO:0048812(neuron projection morphogenesis)//GO:003410…
TRAPPC13	ENSG00000113597	protein_coding	+	chr5:64885506-65167553	9.13562	4.45268	1.85883	1.03683	0.0003	0.000733625	up	80006	C5orf44	HGNC:HGNC:25828|Ensembl:ENSG00000113597|Ensembl:ENSG00000253251|HPRD:07832|Vega:OTTHUMG00000162694|Vega:OTTHUMG00000163649	5	5q12.3	trafficking protein particle complex 13			GO:0005515(protein binding)
STC2	ENSG00000113739	protein_coding	-	chr5:172741715-172756506	58.9368	0.422713	42.1285	7.12335	5e-05	0.000136014	up	8614	STC-2|STCRP	MIM:603665|HGNC:HGNC:11374|Ensembl:ENSG00000113739|HPRD:04717|Vega:OTTHUMG00000130542	5	5q35.1	stanniocalcin 2		GO:0005783(endoplasmic reticulum)//GO:0005794(Golgi apparatus)//GO:0048471(perinuclear region of cytoplasm)//GO:0005576(extracellular region)//GO:0005615(extracellular space)	GO:0020037(heme binding)//GO:0019899(enzyme binding)//GO:0005179(hormone activity)//GO:0042803(protein homodimerization activity)	GO:0010629(negative regulation of gene expression)//GO:0006979(response to oxidative stress)//GO:0046697(decidualization)//GO:0030968(endoplasmic reticulum unfolded protein response)//GO:0006874(cellular calcium ion homeostasis)//GO:0033280(response to vitamin D)//GO:0007566(embryo implantation)//GO:2001256(regulation of store-operated calcium entry)//GO:0046885(regulation of hormone biosynthetic…
HRH2	ENSG00000113749	protein_coding	+	chr5:175085032-175113245	2.57928	0.995684	1.79351	1.37321	5e-05	0.000136014	up	3274	H2R	MIM:142703|HGNC:HGNC:5183|Ensembl:ENSG00000113749|HPRD:00816|Vega:OTTHUMG00000130660	5	5q35.2	histamine receptor H2	hsa04020(Calcium signaling pathway)//hsa04080(Neuroactive ligand-receptor interaction)//hsa04971(Gastric acid secretion)	GO:0005886(plasma membrane)//GO:0005887(integral component of plasma membrane)	GO:0004969(histamine receptor activity)	GO:0003382(epithelial cell morphogenesis)//GO:0048732(gland development)//GO:0045907(positive regulation of vasoconstriction)//GO:0008542(visual learning)//GO:0048565(digestive tract development)//GO:0048167(regulation of synaptic plasticity)//GO:0007187(G-protein coupled receptor signaling pathway, coupled to cyclic nucleotide second messenger)//GO:0001698(gastrin-induced gastric acid secretion)…
EHHADH	ENSG00000113790	protein_coding	-	chr3:184880658-184999778	2.85706	0.979121	1.94888	1.54497	5e-05	0.000136014	up	1962	ECHD|FRTS3|L-PBE|LBFP|LBP|PBFE	MIM:607037|HGNC:HGNC:3247|Ensembl:ENSG00000113790|HPRD:06125|Vega:OTTHUMG00000156698	3	3q26.3-q28	enoyl-CoA, hydratase/3-hydroxyacyl CoA dehydrogenase	hsa00071(Fatty acid degradation)//hsa00280(Valine, leucine and isoleucine degradation)//hsa00310(Lysine degradation)//hsa00380(Tryptophan metabolism)//hsa00410(beta-Alanine metabolism)//hsa00640(Propanoate metabolism)//hsa00650(Butanoate metabolism)//	GO:0005777(peroxisome)//GO:0005739(mitochondrion)//GO:0005829(cytosol)	GO:0005102(receptor binding)//GO:0019899(enzyme binding)//GO:0004165(dodecenoyl-CoA delta-isomerase activity)//GO:0003857(3-hydroxyacyl-CoA dehydrogenase activity)//GO:0004300(enoyl-CoA hydratase activity)//GO:0003824(catalytic activity)//GO:0005515(protein binding)	GO:0006475(internal protein amino acid acetylation)//GO:0008152(metabolic process)//GO:0006635(fatty acid beta-oxidation)
TBCCD1	ENSG00000113838	protein_coding	-	chr3:186256229-186315061	10.9047	2.30947	3.59716	2.23932	5e-05	0.000136014	up	55171	-	HGNC:HGNC:25546|Ensembl:ENSG00000113838|HPRD:07684|Vega:OTTHUMG00000156613	3	3q27.3	TBCC domain containing 1		GO:0005737(cytoplasm)//GO:0031616(spindle pole centrosome)	GO:0003779(actin binding)	GO:0008360(regulation of cell shape)//GO:0000902(cell morphogenesis)//GO:0051684(maintenance of Golgi location)//GO:0007010(cytoskeleton organization)//GO:0051661(maintenance of centrosome location)//GO:0030334(regulation of cell migration)
BCL6	ENSG00000113916	protein_coding	-	chr3:187416046-187463515	280.784	96.7902	2.88152	1.53653	5e-05	0.000136014	up	604	BCL5|BCL6A|LAZ3|ZBTB27|ZNF51	MIM:109565|HGNC:HGNC:1001|Ensembl:ENSG00000113916|HPRD:00180|Vega:OTTHUMG00000156441	3	3q27	B-cell CLL/lymphoma 6	hsa04068(FoxO signaling pathway)//hsa05202(Transcriptional misregulation in cancer)	GO:0005634(nucleus)//GO:0005657(replication fork)	GO:0001161(intronic transcription regulatory region sequence-specific DNA binding)//GO:0001227(transcriptional repressor activity, RNA polymerase II transcription regulatory region sequence-specific binding)//GO:0003700(transcription factor activity, sequence-specific DNA binding)//GO:0043565(sequence-specific DNA binding)//GO:0003682(chromatin binding)//GO:0000977(RNA polymerase II regulatory re…	GO:0030890(positive regulation of B cell proliferation)//GO:0000060(protein import into nucleus, translocation)//GO:0035024(negative regulation of Rho protein signal transduction)//GO:0032764(negative regulation of mast cell cytokine production)//GO:0007283(spermatogenesis)//GO:0050727(regulation of inflammatory response)//GO:0048821(erythrocyte development)//GO:0008285(negative regulation of cel…
OGG1	ENSG00000114026	protein_coding	+	chr3:9791627-9896822	17.1119	7.61006	2.10357	1.16902	5e-05	0.000136014	up	4968	HMMH|HOGG1|MUTM|OGH1	MIM:601982|HGNC:HGNC:8125|Ensembl:ENSG00000114026|HPRD:03582|Vega:OTTHUMG00000097091	3	3p26.2	8-oxoguanine DNA glycosylase	hsa03410(Base excision repair)	GO:0043234(protein complex)//GO:0016363(nuclear matrix)//GO:0005739(mitochondrion)//GO:0016607(nuclear speck)//GO:0005654(nucleoplasm)//GO:0005634(nucleus)	GO:0034039(8-oxo-7,8-dihydroguanine DNA N-glycosylase activity)//GO:0032357(oxidized purine DNA binding)//GO:0003684(damaged DNA binding)//GO:0008534(oxidized purine nucleobase lesion DNA N-glycosylase activity)//GO:0003824(catalytic activity)//GO:0004519(endonuclease activity)//GO:0005515(protein binding)//GO:0008017(microtubule binding)	GO:0006979(response to oxidative stress)//GO:0033683(nucleotide-excision repair, DNA incision)//GO:0051593(response to folic acid)//GO:0043066(negative regulation of apoptotic process)//GO:0006974(cellular response to DNA damage stimulus)//GO:0006284(base-excision repair)//GO:0045007(depurination)//GO:0009314(response to radiation)//GO:0045471(response to ethanol)//GO:0042493(response to drug)//G…
PDCD10	ENSG00000114209	protein_coding	-	chr3:167401085-167452727	23.1846	9.81248	2.23673	1.24048	5e-05	0.000136014	up	11235	CCM3|TFAR15	MIM:609118|HGNC:HGNC:8761|Ensembl:ENSG00000114209|HPRD:10141|Vega:OTTHUMG00000158415	3	3q26.1	programmed cell death 10		GO:0005886(plasma membrane)//GO:0070062(extracellular exosome)//GO:0005794(Golgi apparatus)//GO:0005829(cytosol)//GO:0000139(Golgi membrane)//GO:0005737(cytoplasm)	GO:0019901(protein kinase binding)//GO:0047485(protein N-terminus binding)//GO:0005515(protein binding)//GO:0042803(protein homodimerization activity)	GO:0010629(negative regulation of gene expression)//GO:0044319(wound healing, spreading of cells)//GO:0008284(positive regulation of cell proliferation)//GO:0035023(regulation of Rho protein signal transduction)//GO:0071902(positive regulation of protein serine/threonine kinase activity)//GO:0010628(positive regulation of gene expression)//GO:0043406(positive regulation of MAP kinase activity)//G…
ECT2	ENSG00000114346	protein_coding	+	chr3:172468471-172539264	4.90766	1.38842	2.47346	1.82159	5e-05	0.000136014	up	1894	ARHGEF31	MIM:600586|HGNC:HGNC:3155|Ensembl:ENSG00000114346|HPRD:11860|Vega:OTTHUMG00000156762	3	3q26.1-q26.2	epithelial cell transforming 2		GO:0005923(bicellular tight junction)//GO:0005829(cytosol)//GO:0030496(midbody)//GO:0097149(centralspindlin complex)//GO:0005737(cytoplasm)//GO:0005634(nucleus)//GO:0032154(cleavage furrow)//GO:0005911(cell-cell junction)//GO:0072686(mitotic spindle)	GO:0017048(Rho GTPase binding)//GO:0004871(signal transducer activity)//GO:0042803(protein homodimerization activity)//GO:0005096(GTPase activator activity)//GO:0005085(guanyl-nucleotide exchange factor activity)//GO:0005089(Rho guanyl-nucleotide exchange factor activity)//GO:0005515(protein binding)	GO:0051260(protein homooligomerization)//GO:0043123(positive regulation of I-kappaB kinase/NF-kappaB signaling)//GO:0090630(activation of GTPase activity)//GO:0070301(cellular response to hydrogen peroxide)//GO:0097190(apoptotic signaling pathway)//GO:0048011(neurotrophin TRK receptor signaling pathway)//GO:0000910(cytokinesis)//GO:0000902(cell morphogenesis)//GO:0032147(activation of protein kin…
USP9Y	ENSG00000114374	protein_coding	+	chrY:14813159-14972764	8.31354	0.0371642	8.97981	7.80541	0.04205	0.064972	up	8287	DFFRY|SPGFY2	MIM:400005|HGNC:HGNC:12633|Ensembl:ENSG00000114374|HPRD:02449|Vega:OTTHUMG00000036469	Y	Yq11.2	ubiquitin specific peptidase 9, Y-linked		GO:0005737(cytoplasm)	GO:0070410(co-SMAD binding)//GO:0004843(thiol-dependent ubiquitin-specific protease activity)//GO:0008234(cysteine-type peptidase activity)	GO:0030509(BMP signaling pathway)//GO:0016579(protein deubiquitination)//GO:0007283(spermatogenesis)//GO:0016477(cell migration)//GO:0006511(ubiquitin-dependent protein catabolic process)//GO:0007179(transforming growth factor beta receptor signaling pathway)
CYB561D2	ENSG00000114395	protein_coding	+	chr3:50384760-50541675	3.74942	0.91307	2.48262	2.03787	5e-05	0.000136014	up	11068	101F6|TSP10|XXcos-LUCA11.4	MIM:607068|HGNC:HGNC:30253|Ensembl:ENSG00000114395|Ensembl:ENSG00000271858|HPRD:06143|Vega:OTTHUMG00000156813	3	3p21.3	cytochrome b561 family member D2		GO:0016021(integral component of membrane)	GO:0046872(metal ion binding)	GO:0055114(oxidation-reduction process)
GBE1	ENSG00000114480	protein_coding	-	chr3:81538849-81811312	21.0926	9.28756	2.14751	1.18337	5e-05	0.000136014	up	2632	APBD|GBE|GSD4	MIM:607839|HGNC:HGNC:4180|Ensembl:ENSG00000114480|HPRD:01985|Vega:OTTHUMG00000158978	3	3p12.3	glucan (1,4-alpha-), branching enzyme 1	hsa00500(Starch and sucrose metabolism)//	GO:0070062(extracellular exosome)//GO:0005829(cytosol)	GO:0043169(cation binding)//GO:0004553(hydrolase activity, hydrolyzing O-glycosyl compounds)//GO:0003844(1,4-alpha-glucan branching enzyme activity)	GO:0044281(small molecule metabolic process)//GO:0005978(glycogen biosynthetic process)//GO:0006006(glucose metabolic process)//GO:0005975(carbohydrate metabolic process)//GO:0006091(generation of precursor metabolites and energy)//GO:0005977(glycogen metabolic process)
NEK11	ENSG00000114670	protein_coding	+	chr3:130569438-131100319	15.0196	4.52206	2.90102	1.73179	5e-05	0.000136014	up	79858	-	MIM:609779|HGNC:HGNC:18593|Ensembl:ENSG00000114670|HPRD:14821|Vega:OTTHUMG00000159654	3	3q22.1	NIMA related kinase 11		GO:0005654(nucleoplasm)//GO:0005730(nucleolus)	GO:0004672(protein kinase activity)//GO:0005524(ATP binding)//GO:0046872(metal ion binding)//GO:0004674(protein serine/threonine kinase activity)//GO:0005515(protein binding)	GO:0031573(intra-S DNA damage checkpoint)//GO:0031572(G2 DNA damage checkpoint)//GO:0044772(mitotic cell cycle phase transition)//GO:1901990(regulation of mitotic cell cycle phase transition)//GO:0006468(protein phosphorylation)//GO:0016572(histone phosphorylation)//GO:0035556(intracellular signal transduction)
COMMD2	ENSG00000114744	protein_coding	-	chr3:149456256-149470286	12.7591	5.59027	2.08779	1.19053	5e-05	0.000136014	up	51122	HSPC042	MIM:616699|HGNC:HGNC:24993|Ensembl:ENSG00000114744|HPRD:13081|Vega:OTTHUMG00000159616	3	3q25.1	COMM domain containing 2		GO:0005737(cytoplasm)	GO:0005515(protein binding)	GO:0006351(transcription, DNA-templated)//GO:0006355(regulation of transcription, DNA-templated)
NEK4	ENSG00000114904	protein_coding	-	chr3:52744799-52804965	16.9067	5.36807	2.81195	1.65512	5e-05	0.000136014	up	6787	NRK2|STK2|pp12301	MIM:601959|HGNC:HGNC:11399|Ensembl:ENSG00000114904|HPRD:11880|Vega:OTTHUMG00000158836	3	3p21.1	NIMA related kinase 4		GO:0005929(cilium)//GO:0005737(cytoplasm)	GO:0004672(protein kinase activity)//GO:0005524(ATP binding)//GO:0030145(manganese ion binding)//GO:0004674(protein serine/threonine kinase activity)	GO:1900062(regulation of replicative cell aging)//GO:0007067(mitotic nuclear division)//GO:0032147(activation of protein kinase activity)//GO:2001020(regulation of response to DNA damage stimulus)//GO:0006974(cellular response to DNA damage stimulus)//GO:2000772(regulation of cellular senescence)//GO:0023014(signal transduction by protein phosphorylation)//GO:0007346(regulation of mitotic cell cy…
SLC4A3	ENSG00000114923	protein_coding	+	chr2:220492048-220506702	1.63291	0.500672	1.75449	1.70551	0.0005	0.00117341	up	6508	AE3|SLC2C	MIM:106195|HGNC:HGNC:11029|Ensembl:ENSG00000114923|HPRD:00109|Vega:OTTHUMG00000059238	2	2q36	solute carrier family 4 member 3		GO:0016020(membrane)//GO:0016021(integral component of membrane)//GO:0005887(integral component of plasma membrane)//GO:0005886(plasma membrane)	GO:0005452(inorganic anion exchanger activity)	GO:0015701(bicarbonate transport)//GO:0051453(regulation of intracellular pH)//GO:0098656(anion transmembrane transport)//GO:1902476(chloride transmembrane transport)//GO:0055085(transmembrane transport)//GO:0006810(transport)//GO:0006811(ion transport)
TTL	ENSG00000114999	protein_coding	+	chr2:113239730-113299316	9.35425	4.57579	1.857	1.0316	5e-05	0.000136014	up	150465	-	MIM:608291|HGNC:HGNC:21586|HPRD:12206	2	2q13	tubulin tyrosine ligase			GO:0005524(ATP binding)//GO:0004835(tubulin-tyrosine ligase activity)	GO:0030516(regulation of axon extension)//GO:0006464(cellular protein modification process)//GO:0000226(microtubule cytoskeleton organization)
FAHD2A	ENSG00000115042	protein_coding	+	chr2:96068468-96082364	15.4825	4.32803	3.09354	1.83886	5e-05	0.000136014	up	51011	CGI-105	HGNC:HGNC:24252|Ensembl:ENSG00000115042|HPRD:13287|Vega:OTTHUMG00000130397	2	2q11.2	fumarylacetoacetate hydrolase domain containing 2A			GO:0003824(catalytic activity)//GO:0046872(metal ion binding)//GO:0016787(hydrolase activity)	GO:0008152(metabolic process)
STAM2	ENSG00000115145	protein_coding	-	chr2:152973314-153032506	33.5354	11.4412	2.77589	1.55145	5e-05	0.000136014	up	10254	Hbp|STAM2A|STAM2B	MIM:606244|HGNC:HGNC:11358|Ensembl:ENSG00000115145|HPRD:05876|Vega:OTTHUMG00000131885	2	2q23.3	signal transducing adaptor molecule 2	hsa04144(Endocytosis)//hsa04630(Jak-STAT signaling pathway)	GO:0033565(ESCRT-0 complex)//GO:0043231(intracellular membrane-bounded organelle)//GO:0005829(cytosol)//GO:0031901(early endosome membrane)//GO:0005654(nucleoplasm)//GO:0005737(cytoplasm)	GO:0005515(protein binding)	GO:0061024(membrane organization)//GO:0006886(intracellular protein transport)//GO:0042059(negative regulation of epidermal growth factor receptor signaling pathway)//GO:0007173(epidermal growth factor receptor signaling pathway)//GO:0036258(multivesicular body assembly)//GO:0006914(autophagy)//GO:0016197(endosomal transport)
EIF2B4	ENSG00000115211	protein_coding	-	chr2:27548715-27593353	29.7251	6.46517	4.11579	2.20092	5e-05	0.000136014	up	8890	EIF-2B|EIF2B|EIF2Bdelta	MIM:606687|HGNC:HGNC:3260|Ensembl:ENSG00000115211|HPRD:09459|Vega:OTTHUMG00000151927	2	2p23.3	eukaryotic translation initiation factor 2B subunit delta	hsa03013(RNA transport)	GO:0005851(eukaryotic translation initiation factor 2B complex)//GO:0005737(cytoplasm)//GO:0005829(cytosol)	GO:0005085(guanyl-nucleotide exchange factor activity)//GO:0031369(translation initiation factor binding)//GO:0005515(protein binding)//GO:0003743(translation initiation factor activity)//GO:0046523(S-methyl-5-thioribose-1-phosphate isomerase activity)	GO:0006417(regulation of translation)//GO:0044267(cellular protein metabolic process)//GO:0009408(response to heat)//GO:0009749(response to glucose)//GO:0051716(cellular response to stimulus)//GO:0010467(gene expression)//GO:0042552(myelination)//GO:0043547(positive regulation of GTPase activity)//GO:0006412(translation)//GO:0001541(ovarian follicle development)//GO:0006413(translational initiati…
ITGA4	ENSG00000115232	protein_coding	+	chr2:182321928-182400914	5.25558	1.68236	2.33212	1.64337	0.0001	0.00026153	up	3676	CD49D|IA4	MIM:192975|HGNC:HGNC:6140|HPRD:01894	2	2q31.3	integrin subunit alpha 4	hsa04151(PI3K-Akt signaling pathway)//hsa04510(Focal adhesion)//hsa04512(ECM-receptor interaction)//hsa04514(Cell adhesion molecules (CAMs))//hsa04640(Hematopoietic cell lineage)//hsa04670(Leukocyte transendothelial migration)//hsa04672(Intestinal immune network for IgA production)//hsa04810(Regulation of actin cytoskeleton)//hsa05140(Leishmaniasis)//hsa05410(Hypertrophic cardiomyopathy (HCM))//h…	GO:0009897(external side of plasma membrane)//GO:0070062(extracellular exosome)//GO:0009986(cell surface)//GO:0034669(integrin alpha4-beta7 complex)//GO:0016020(membrane)//GO:0005911(cell-cell junction)//GO:0005886(plasma membrane)//GO:0008305(integrin complex)//GO:0005925(focal adhesion)	GO:0005515(protein binding)//GO:0050839(cell adhesion molecule binding)//GO:0046872(metal ion binding)//GO:0001968(fibronectin binding)//GO:1990405(protein antigen binding)	GO:0043113(receptor clustering)//GO:0034113(heterotypic cell-cell adhesion)//GO:0050901(leukocyte tethering or rolling)//GO:0050900(leukocyte migration)//GO:1990771(clathrin-mediated extracellular exosome endocytosis)//GO:0007507(heart development)//GO:0007157(heterophilic cell-cell adhesion via plasma membrane cell adhesion molecules)//GO:0060324(face development)//GO:0007229(integrin-mediated s…
GPR75-ASB3	ENSG00000115239	protein_coding	-	chr2:53759809-54087297	17.0331	6.79576	2.31319	1.32563	5e-05	0.000136014	up	100302652	-	HGNC:HGNC:40043|Ensembl:ENSG00000270898|Vega:OTTHUMG00000129279	2	2p16	GPR75-ASB3 readthrough		GO:0005622(intracellular)		GO:0035556(intracellular signal transduction)//GO:0016567(protein ubiquitination)
POLE4	ENSG00000115350	protein_coding	+	chr2:75185618-75197255	41.8569	12.8333	3.0981	1.70557	5e-05	0.000136014	up	56655	YHHQ1|p12	MIM:607269|HGNC:HGNC:18755|HPRD:16238	2	2p12	polymerase (DNA-directed), epsilon 4, accessory subunit	hsa00230(Purine metabolism)//hsa00240(Pyrimidine metabolism)//	GO:0005634(nucleus)//GO:0005671(Ada2/Gcn5/Ada3 transcription activator complex)//GO:0008622(epsilon DNA polymerase complex)	GO:0003887(DNA-directed DNA polymerase activity)//GO:0046982(protein heterodimerization activity)//GO:0005515(protein binding)//GO:0003677(DNA binding)	GO:0071897(DNA biosynthetic process)//GO:0043966(histone H3 acetylation)
ACADL	ENSG00000115361	protein_coding	-	chr2:211036241-211095107	25.1697	5.58504	3.97411	2.17205	5e-05	0.000136014	up	33	ACAD4|LCAD	MIM:609576|HGNC:HGNC:88|Ensembl:ENSG00000115361|HPRD:01939|Vega:OTTHUMG00000132989	2	2q34	acyl-CoA dehydrogenase, long chain	hsa00071(Fatty acid degradation)//	GO:0031966(mitochondrial membrane)//GO:0005739(mitochondrion)//GO:0005759(mitochondrial matrix)	GO:0052890(oxidoreductase activity, acting on the CH-CH group of donors, with a flavin as acceptor)//GO:0003995(acyl-CoA dehydrogenase activity)//GO:0016401(palmitoyl-CoA oxidase activity)//GO:0009055(electron carrier activity)//GO:0000062(fatty-acyl-CoA binding)//GO:0004466(long-chain-acyl-CoA dehydrogenase activity)//GO:0050660(flavin adenine dinucleotide binding)	GO:0044255(cellular lipid metabolic process)//GO:0055114(oxidation-reduction process)//GO:0006635(fatty acid beta-oxidation)//GO:0044281(small molecule metabolic process)//GO:0051289(protein homotetramerization)//GO:0045717(negative regulation of fatty acid biosynthetic process)//GO:0019254(carnitine metabolic process, CoA-linked)//GO:0046322(negative regulation of fatty acid oxidation)//GO:00550…
EVA1A	ENSG00000115363	protein_coding	-	chr2:75696427-75796848	1.59438	0	2.59438	inf	5e-05	0.000136014	up	84141	FAM176A|TMEM166	HGNC:HGNC:25816|Ensembl:ENSG00000115363|HPRD:07827|Vega:OTTHUMG00000129991	2	2p12	eva-1 homolog A, regulator of programmed cell death		GO:0005765(lysosomal membrane)//GO:0005886(plasma membrane)//GO:0005789(endoplasmic reticulum membrane)//GO:0016021(integral component of membrane)//GO:0043231(intracellular membrane-bounded organelle)		GO:0006915(apoptotic process)//GO:0006914(autophagy)
FN1	ENSG00000115414	protein_coding	-	chr2:216225162-216300895	3217.03	654.86	4.90658	2.29647	5e-05	0.000136014	up	2335	CIG|ED-B|FINC|FN|FNZ|GFND|GFND2|LETS|MSF	MIM:135600|HGNC:HGNC:3778|Ensembl:ENSG00000115414|HPRD:00626|Vega:OTTHUMG00000133054	2	2q34	fibronectin 1	hsa04151(PI3K-Akt signaling pathway)//hsa04510(Focal adhesion)//hsa04512(ECM-receptor interaction)//hsa04810(Regulation of actin cytoskeleton)//	GO:0070062(extracellular exosome)//GO:0005576(extracellular region)//GO:0031093(platelet alpha granule lumen)//GO:0005577(fibrinogen complex)//GO:0005605(basal lamina)//GO:0031012(extracellular matrix)//GO:0005793(endoplasmic reticulum-Golgi intermediate compartment)//GO:0072562(blood microparticle)//GO:0005615(extracellular space)//GO:0016324(apical plasma membrane)	GO:0045340(mercury ion binding)//GO:0002020(protease binding)//GO:0005518(collagen binding)//GO:0008201(heparin binding)//GO:0016504(peptidase activator activity)//GO:0005178(integrin binding)//GO:0005515(protein binding)	GO:0030168(platelet activation)//GO:0035924(cellular response to vascular endothelial growth factor stimulus)//GO:0043066(negative regulation of apoptotic process)//GO:0022617(extracellular matrix disassembly)//GO:0010628(positive regulation of gene expression)//GO:0009611(response to wounding)//GO:1904237(positive regulation of substrate-dependent cell migration, cell attachment to substrate)//G…
DNAH6	ENSG00000115423	protein_coding	+	chr2:84743578-85046713	3.78388	1.24135	2.13437	1.60795	5e-05	0.000136014	up	1768	DNHL1|Dnahc6|HL-2|HL2	MIM:603336|HGNC:HGNC:2951|Ensembl:ENSG00000115423|Vega:OTTHUMG00000128957	2	2p11.2	dynein, axonemal, heavy chain 6	hsa05016(Huntington's disease)	GO:0005874(microtubule)//GO:0005858(axonemal dynein complex)	GO:0005524(ATP binding)//GO:0016887(ATPase activity)//GO:0003777(microtubule motor activity)	GO:0008152(metabolic process)//GO:0001539(cilium or flagellum-dependent cell motility)//GO:0007018(microtubule-based movement)
CHST10	ENSG00000115526	protein_coding	-	chr2:101008326-101034118	6.85643	2.96594	1.98098	1.20897	5e-05	0.000136014	up	9486	HNK-1ST|HNK1ST	MIM:606376|HGNC:HGNC:19650|Ensembl:ENSG00000115526|HPRD:07332|Vega:OTTHUMG00000130669	2	2q11.2	carbohydrate sulfotransferase 10	hsa00514(Other types of O-glycan biosynthesis)	GO:0016020(membrane)//GO:0016021(integral component of membrane)//GO:0005794(Golgi apparatus)//GO:0000139(Golgi membrane)	GO:0008146(sulfotransferase activity)//GO:0016232(HNK-1 sulfotransferase activity)	GO:0007616(long-term memory)//GO:0044267(cellular protein metabolic process)//GO:0007612(learning)//GO:0007155(cell adhesion)//GO:0043687(post-translational protein modification)//GO:0018279(protein N-linked glycosylation via asparagine)//GO:0016051(carbohydrate biosynthetic process)
IL1RL2	ENSG00000115598	protein_coding	+	chr2:102803432-102856462	1.30211	0.255674	1.83337	2.34847	0.00065	0.00149311	up	8808	IL-1Rrp2|IL-36R|IL1R-rp2|IL1RRP2	MIM:604512|HGNC:HGNC:5999|Ensembl:ENSG00000115598|HPRD:05150|Vega:OTTHUMG00000130776	2	2q12	interleukin 1 receptor like 2		GO:0005887(integral component of plasma membrane)	GO:0004908(interleukin-1 receptor activity)//GO:0004909(interleukin-1, Type I, activating receptor activity)	GO:0045087(innate immune response)//GO:0045582(positive regulation of T cell differentiation)//GO:0050727(regulation of inflammatory response)//GO:0006954(inflammatory response)//GO:0019221(cytokine-mediated signaling pathway)//GO:0032755(positive regulation of interleukin-6 production)//GO:0070498(interleukin-1-mediated signaling pathway)//GO:0006968(cellular defense response)//GO:0007165(signal…
IL1RL1	ENSG00000115602	protein_coding	+	chr2:102927961-103015218	6.79211	1.29273	3.39862	2.39344	5e-05	0.000136014	up	9173	DER4|FIT-1|IL33R|ST2|ST2L|ST2V|T1	MIM:601203|HGNC:HGNC:5998|Ensembl:ENSG00000115602|HPRD:03123|Vega:OTTHUMG00000130782	2	2q12	interleukin 1 receptor like 1		GO:0005886(plasma membrane)//GO:0009986(cell surface)//GO:0016021(integral component of membrane)//GO:0005578(proteinaceous extracellular matrix)//GO:0005622(intracellular)//GO:0005615(extracellular space)	GO:0002114(interleukin-33 receptor activity)//GO:0002113(interleukin-33 binding)//GO:0004896(cytokine receptor activity)//GO:0004908(interleukin-1 receptor activity)//GO:0005515(protein binding)//GO:0005057(receptor signaling protein activity)	GO:0032754(positive regulation of interleukin-5 production)//GO:0038172(interleukin-33-mediated signaling pathway)//GO:0090197(positive regulation of chemokine secretion)//GO:0032689(negative regulation of interferon-gamma production)//GO:0050729(positive regulation of inflammatory response)//GO:1901653(cellular response to peptide)//GO:0019221(cytokine-mediated signaling pathway)//GO:0008285(neg…
TPO	ENSG00000115705	protein_coding	+	chr2:1377994-1547483	3.97513	1.85117	1.74494	1.10257	0.00885	0.0161632	up	7173	MSA|TDH2A|TPX	MIM:606765|HGNC:HGNC:12015|Ensembl:ENSG00000115705|HPRD:06000|Vega:OTTHUMG00000090271	2	2p25	thyroid peroxidase	hsa00350(Tyrosine metabolism)//	GO:0005886(plasma membrane)//GO:0005887(integral component of plasma membrane)//GO:0009986(cell surface)//GO:0016021(integral component of membrane)//GO:0005739(mitochondrion)//GO:0005615(extracellular space)	GO:0020037(heme binding)//GO:0004601(peroxidase activity)//GO:0004447(iodide peroxidase activity)//GO:0005509(calcium ion binding)	GO:0055114(oxidation-reduction process)//GO:0035162(embryonic hemopoiesis)//GO:0044281(small molecule metabolic process)//GO:0033993(response to lipid)//GO:0006979(response to oxidative stress)//GO:0042744(hydrogen peroxide catabolic process)//GO:0071732(cellular response to nitric oxide)//GO:0098869(cellular oxidant detoxification)//GO:0034641(cellular nitrogen compound metabolic process)//GO:00…
RMDN2	ENSG00000115841	protein_coding	+	chr2:38150329-38408997	3.29433	1.08989	2.05481	1.59581	0.0003	0.000733625	up	151393	BLOCK18|FAM82A|FAM82A1|PRO34163|PYST9371|RMD-2|RMD2|RMD4	MIM:611872|HGNC:HGNC:26567|Ensembl:ENSG00000115841|HPRD:08741|Vega:OTTHUMG00000128487	2	2p22.2	regulator of microtubule dynamics 2		GO:0016021(integral component of membrane)//GO:0005739(mitochondrion)//GO:0005874(microtubule)//GO:0005737(cytoplasm)//GO:0000922(spindle pole)	GO:0005515(protein binding)
ARID3A	ENSG00000116017	protein_coding	+	chr19:925780-975939	7.30221	2.05065	2.72146	1.83225	5e-05	0.000136014	up	1820	BRIGHT|DRIL1|DRIL3|E2FBP1	MIM:603265|HGNC:HGNC:3031|HPRD:10343	19	19p13.3	AT-rich interaction domain 3A		GO:0005654(nucleoplasm)//GO:0045121(membrane raft)//GO:0005794(Golgi apparatus)//GO:0005737(cytoplasm)//GO:0005730(nucleolus)	GO:0042803(protein homodimerization activity)//GO:0003682(chromatin binding)//GO:0000977(RNA polymerase II regulatory region sequence-specific DNA binding)//GO:0001228(transcriptional activator activity, RNA polymerase II transcription regulatory region sequence-specific binding)//GO:0005515(protein binding)//GO:0003677(DNA binding)	GO:0006366(transcription from RNA polymerase II promoter)//GO:0045944(positive regulation of transcription from RNA polymerase II promoter)
MORN1	ENSG00000116151	protein_coding	-	chr1:2252691-2323146	7.55574	2.14168	2.7233	1.81883	5e-05	0.000136014	up	79906	-	HGNC:HGNC:25852|Ensembl:ENSG00000116151|HPRD:07843|Vega:OTTHUMG00000001402	1	1p36.33-p36.32	MORN repeat containing 1
CEP104	ENSG00000116198	protein_coding	-	chr1:3728644-3773797	33.9506	14.6782	2.22925	1.20976	5e-05	0.000136014	up	9731	CFAP256|GlyBP|JBTS25|KIAA0562|ROC22	MIM:616690|HGNC:HGNC:24866|Ensembl:ENSG00000116198|HPRD:11091|Vega:OTTHUMG00000003507	1	1p36.32	centrosomal protein 104kDa		GO:0005814(centriole)	GO:0005515(protein binding)
STXBP3	ENSG00000116266	protein_coding	+	chr1:109289295-109352148	35.077	17.2974	1.9717	1.01997	5e-05	0.000136014	up	6814	MUNC18-3|MUNC18C|PSP|UNC-18C	MIM:608339|HGNC:HGNC:11446|Ensembl:ENSG00000116266|HPRD:10517|Vega:OTTHUMG00000011122	1	1p13.3	syntaxin binding protein 3		GO:0005886(plasma membrane)//GO:0070062(extracellular exosome)//GO:0070820(tertiary granule)//GO:0005829(cytosol)//GO:0016323(basolateral plasma membrane)//GO:0042581(specific granule)//GO:0031091(platelet alpha granule)//GO:0016324(apical plasma membrane)	GO:0017075(syntaxin-1 binding)//GO:0005515(protein binding)//GO:0019905(syntaxin binding)	GO:0030168(platelet activation)//GO:0015758(glucose transport)//GO:0007596(blood coagulation)//GO:0007420(brain development)//GO:0070527(platelet aggregation)//GO:0045955(negative regulation of calcium ion-dependent exocytosis)//GO:0051291(protein heterooligomerization)//GO:0022615(protein to membrane docking)//GO:0061024(membrane organization)//GO:0030073(insulin secretion)//GO:0006904(vesicle d…
WDR77	ENSG00000116455	protein_coding	-	chr1:111981259-112005395	9.97387	2.7589	2.91944	1.85406	5e-05	0.000136014	up	79084	HKMT1069|MEP-50|MEP50|Nbla10071|p44|p44/Mep50	MIM:611734|HGNC:HGNC:29652|Ensembl:ENSG00000116455|HPRD:14387|Vega:OTTHUMG00000011748	1	1p13.2	WD repeat domain 77		GO:0034709(methylosome)//GO:0005794(Golgi apparatus)//GO:0005829(cytosol)//GO:0005654(nucleoplasm)//GO:0005634(nucleus)//GO:0005737(cytoplasm)	GO:0030374(ligand-dependent nuclear receptor transcription coactivator activity)//GO:0005515(protein binding)//GO:0008327(methyl-CpG binding)	GO:0006325(chromatin organization)//GO:0008284(positive regulation of cell proliferation)//GO:0060770(negative regulation of epithelial cell proliferation involved in prostate gland development)//GO:0060528(secretory columnal luminar epithelial cell differentiation involved in prostate glandular acinus development)//GO:0000387(spliceosomal snRNP assembly)//GO:0010467(gene expression)//GO:0034660(…
FBXO2	ENSG00000116661	protein_coding	-	chr1:11708423-11723384	25.6155	10.1263	2.39212	1.33892	5e-05	0.000136014	up	26232	FBG1|FBX2|Fbs1|NFB42|OCP1	MIM:607112|HGNC:HGNC:13581|Ensembl:ENSG00000116661|HPRD:06171|Vega:OTTHUMG00000002072	1	1p36.22	F-box protein 2	hsa04120(Ubiquitin mediated proteolysis)//hsa04141(Protein processing in endoplasmic reticulum)	GO:0070062(extracellular exosome)//GO:0019005(SCF ubiquitin ligase complex)//GO:0005783(endoplasmic reticulum)//GO:0005829(cytosol)//GO:0031090(organelle membrane)//GO:0043197(dendritic spine)	GO:0005515(protein binding)//GO:0004842(ubiquitin-protein transferase activity)//GO:0030246(carbohydrate binding)//GO:0001540(beta-amyloid binding)//GO:0001948(glycoprotein binding)	GO:0031146(SCF-dependent proteasomal ubiquitin-dependent protein catabolic process)//GO:0016567(protein ubiquitination)//GO:0008285(negative regulation of cell proliferation)//GO:0030433(ER-associated ubiquitin-dependent protein catabolic process)//GO:0006508(proteolysis)//GO:0006464(cellular protein modification process)//GO:0031396(regulation of protein ubiquitination)//GO:0006516(glycoprotein …
IVNS1ABP	ENSG00000116679	protein_coding	-	chr1:185265519-185286461	182.572	67.1876	2.69216	1.4422	5e-05	0.000136014	up	10625	FLARA3|HSPC068|KLHL39|ND1|NS-1|NS1-BP|NS1BP	MIM:609209|HGNC:HGNC:16951|Ensembl:ENSG00000116679|HPRD:10004|Vega:OTTHUMG00000035384	1	1q25.1-q31.1	influenza virus NS1A binding protein	hsa05164(Influenza A)	GO:0005654(nucleoplasm)//GO:0005667(transcription factor complex)//GO:0015629(actin cytoskeleton)//GO:0005737(cytoplasm)//GO:0005681(spliceosomal complex)		GO:0006383(transcription from RNA polymerase III promoter)//GO:0009615(response to virus)//GO:0008380(RNA splicing)//GO:0016032(viral process)//GO:2001243(negative regulation of intrinsic apoptotic signaling pathway)
PRG4	ENSG00000116690	protein_coding	+	chr1:186265404-186344825	240.015	26.3566	8.81012	3.18689	5e-05	0.000136014	up	10216	CACP|HAPO|JCAP|MSF|SZP	MIM:604283|HGNC:HGNC:9364|Ensembl:ENSG00000116690|HPRD:05047|Vega:OTTHUMG00000035574	1	1q25-q31	proteoglycan 4		GO:0005615(extracellular space)	GO:0005044(scavenger receptor activity)//GO:0030247(polysaccharide binding)	GO:0006898(receptor-mediated endocytosis)//GO:0045409(negative regulation of interleukin-6 biosynthetic process)//GO:0008283(cell proliferation)//GO:0042127(regulation of cell proliferation)//GO:0071425(hematopoietic stem cell proliferation)//GO:0006955(immune response)
PLA2G4A	ENSG00000116711	protein_coding	+	chr1:186798084-186958113	6.99403	2.18237	2.51197	1.68023	5e-05	0.000136014	up	5321	PLA2G4|cPLA2|cPLA2-alpha	MIM:600522|HGNC:HGNC:9035|Ensembl:ENSG00000116711|HPRD:08986|Vega:OTTHUMG00000035512	1	1q31.1	phospholipase A2 group IVA	hsa00564(Glycerophospholipid metabolism)//hsa00565(Ether lipid metabolism)//hsa00590(Arachidonic acid metabolism)//hsa00591(Linoleic acid metabolism)//hsa00592(alpha-Linolenic acid metabolism)//	GO:0005743(mitochondrial inner membrane)//GO:0042588(zymogen granule)//GO:0005789(endoplasmic reticulum membrane)//GO:0048471(perinuclear region of cytoplasm)//GO:0005794(Golgi apparatus)//GO:0005829(cytosol)//GO:0005634(nucleus)//GO:0005737(cytoplasm)	GO:0004623(phospholipase A2 activity)//GO:0035035(histone acetyltransferase binding)//GO:0004622(lysophospholipase activity)//GO:0047498(calcium-dependent phospholipase A2 activity)//GO:0005544(calcium-dependent phospholipid binding)//GO:0005509(calcium ion binding)	GO:0006644(phospholipid metabolic process)//GO:0006690(icosanoid metabolic process)//GO:0009395(phospholipid catabolic process)//GO:0030168(platelet activation)//GO:0046697(decidualization)//GO:0036148(phosphatidylglycerol acyl-chain remodeling)//GO:0031622(positive regulation of fever generation)//GO:0031394(positive regulation of prostaglandin biosynthetic process)//GO:0050482(arachidonic acid …
CRYZ	ENSG00000116791	protein_coding	-	chr1:75171169-75232362	28.3333	13.9863	1.95734	1.01849	5e-05	0.000136014	up	1429	-	MIM:123691|HGNC:HGNC:2419|Ensembl:ENSG00000116791|HPRD:00437|Vega:OTTHUMG00000009620	1	1p31.1	crystallin zeta		GO:0070062(extracellular exosome)//GO:0005737(cytoplasm)//GO:0005829(cytosol)	GO:0008270(zinc ion binding)//GO:0003960(NADPH:quinone reductase activity)//GO:0016491(oxidoreductase activity)//GO:0003730(mRNA 3'-UTR binding)//GO:0070402(NADPH binding)//GO:0070404(NADH binding)	GO:0055114(oxidation-reduction process)//GO:0042178(xenobiotic catabolic process)//GO:0007601(visual perception)//GO:0051289(protein homotetramerization)
ZBTB17	ENSG00000116809	protein_coding	-	chr1:16268363-16302627	17.6165	6.87637	2.36359	1.3572	5e-05	0.000136014	up	7709	MIZ-1|ZNF151|ZNF60|pHZ-67	MIM:604084|HGNC:HGNC:12936|Ensembl:ENSG00000116809|HPRD:04968|Vega:OTTHUMG00000009377	1	1p36.13	zinc finger and BTB domain containing 17	hsa04110(Cell cycle)//hsa05202(Transcriptional misregulation in cancer)	GO:0005654(nucleoplasm)	GO:0003676(nucleic acid binding)//GO:0046872(metal ion binding)//GO:0005515(protein binding)//GO:0003677(DNA binding)//GO:0003700(transcription factor activity, sequence-specific DNA binding)	GO:1903955(positive regulation of protein targeting to mitochondrion)//GO:0044267(cellular protein metabolic process)//GO:0001702(gastrulation with mouth forming second)//GO:0030968(endoplasmic reticulum unfolded protein response)//GO:0006351(transcription, DNA-templated)//GO:0036498(IRE1-mediated unfolded protein response)//GO:0007398(ectoderm development)//GO:1903146(regulation of mitophagy)//G…
TFAP2E	ENSG00000116819	protein_coding	+	chr1:36035413-36060929	1.80289	0.212659	2.31136	3.0837	0.0009	0.00201185	up	339488	AP2E	MIM:614428|HGNC:HGNC:30774|Ensembl:ENSG00000116819|HPRD:18174|Vega:OTTHUMG00000004388	1	1p34.3	transcription factor AP-2 epsilon (activating enhancer binding protein 2 epsilon)		GO:0005634(nucleus)	GO:0000978(RNA polymerase II core promoter proximal region sequence-specific DNA binding)//GO:0042803(protein homodimerization activity)//GO:0000981(RNA polymerase II transcription factor activity, sequence-specific DNA binding)//GO:0046982(protein heterodimerization activity)//GO:0000977(RNA polymerase II regulatory region sequence-specific DNA binding)//GO:0001077(transcriptional activator acti…	GO:0048856(anatomical structure development)//GO:0006366(transcription from RNA polymerase II promoter)//GO:0045944(positive regulation of transcription from RNA polymerase II promoter)//GO:0042127(regulation of cell proliferation)
ZNF684	ENSG00000117010	protein_coding	+	chr1:40997232-41013841	3.05363	0.819406	2.228	1.89788	5e-05	0.000136014	up	127396	-	HGNC:HGNC:28418|Ensembl:ENSG00000117010|HPRD:11328|Vega:OTTHUMG00000007359	1	1p34.2	zinc finger protein 684		GO:0005622(intracellular)//GO:0005634(nucleus)	GO:0003676(nucleic acid binding)//GO:0046872(metal ion binding)//GO:0003677(DNA binding)	GO:0006351(transcription, DNA-templated)//GO:0006355(regulation of transcription, DNA-templated)
GALE	ENSG00000117308	protein_coding	-	chr1:24122088-24127271	9.12361	3.8415	2.09101	1.24794	5e-05	0.000136014	up	2582	SDR1E1	MIM:606953|HGNC:HGNC:4116|Ensembl:ENSG00000117308|HPRD:06092|Vega:OTTHUMG00000002958	1	1p36-p35	UDP-galactose-4-epimerase	hsa00052(Galactose metabolism)//hsa00520(Amino sugar and nucleotide sugar metabolism)//	GO:0070062(extracellular exosome)//GO:0005829(cytosol)	GO:0003974(UDP-N-acetylglucosamine 4-epimerase activity)//GO:0050662(coenzyme binding)//GO:0003978(UDP-glucose 4-epimerase activity)//GO:0042803(protein homodimerization activity)	GO:0006012(galactose metabolic process)//GO:0005975(carbohydrate metabolic process)//GO:0044281(small molecule metabolic process)//GO:0019388(galactose catabolic process)
APH1A	ENSG00000117362	protein_coding	-	chr1:150237798-150253327	19.3898	7.32517	2.44918	1.40436	5e-05	0.000136014	up	51107	6530402N02Rik|APH-1|APH-1A|CGI-78	MIM:607629|HGNC:HGNC:29509|Ensembl:ENSG00000117362|Vega:OTTHUMG00000012545	1	1p36.13-q31.3	aph-1 homolog A, gamma secretase subunit	hsa04330(Notch signaling pathway)//hsa05010(Alzheimer's disease)	GO:0016021(integral component of membrane)//GO:0005887(integral component of plasma membrane)//GO:0005789(endoplasmic reticulum membrane)//GO:0005794(Golgi apparatus)//GO:0005886(plasma membrane)//GO:0016020(membrane)//GO:0005783(endoplasmic reticulum)//GO:0032580(Golgi cisterna membrane)	GO:0005515(protein binding)//GO:0004175(endopeptidase activity)	GO:0031293(membrane protein intracellular domain proteolysis)//GO:0001656(metanephros development)//GO:0048013(ephrin receptor signaling pathway)//GO:0006509(membrane protein ectodomain proteolysis)//GO:0043065(positive regulation of apoptotic process)//GO:0016485(protein processing)//GO:0097190(apoptotic signaling pathway)//GO:0007219(Notch signaling pathway)//GO:0007220(Notch receptor processin…
SLC2A1	ENSG00000117394	protein_coding	-	chr1:43391051-43424530	11.5872	4.3506	2.35248	1.41324	5e-05	0.000136014	up	6513	CSE|DYT17|DYT18|DYT9|EIG12|GLUT|GLUT-1|GLUT1|GLUT1DS|HTLVR|PED|SDCHCN	MIM:138140|MIM:143090|HGNC:HGNC:11005|Ensembl:ENSG00000117394|HPRD:00683|Vega:OTTHUMG00000007657	1	1p34.2	solute carrier family 2 member 1	hsa04066(HIF-1 signaling pathway)//hsa04911(Insulin secretion)//hsa04919(Thyroid hormone signaling pathway)//hsa04920(Adipocytokine signaling pathway)//hsa04922(Glucagon signaling pathway)//	GO:0016021(integral component of membrane)//GO:0005887(integral component of plasma membrane)//GO:0005901(caveola)//GO:0016020(membrane)//GO:0005886(plasma membrane)//GO:0005829(cytosol)//GO:0016323(basolateral plasma membrane)//GO:0030496(midbody)//GO:0070062(extracellular exosome)//GO:0000139(Golgi membrane)//GO:0042470(melanosome)//GO:0030864(cortical actin cytoskeleton)//GO:0001939(female pro…	GO:0019900(kinase binding)//GO:0022857(transmembrane transporter activity)//GO:0042802(identical protein binding)//GO:0042910(xenobiotic transporter activity)//GO:0022891(substrate-specific transmembrane transporter activity)//GO:0055056(D-glucose transmembrane transporter activity)//GO:0043621(protein self-association)//GO:0033300(dehydroascorbic acid transporter activity)//GO:0005355(glucose tr…	GO:0050796(regulation of insulin secretion)//GO:0015758(glucose transport)//GO:0044281(small molecule metabolic process)//GO:0019852(L-ascorbic acid metabolic process)//GO:0042149(cellular response to glucose starvation)//GO:0006970(response to osmotic stress)//GO:0042908(xenobiotic transport)//GO:0070837(dehydroascorbic acid transport)//GO:0005975(carbohydrate metabolic process)//GO:0006112(ener…
IPO13	ENSG00000117408	protein_coding	+	chr1:44412610-44433694	9.72496	4.48307	1.95601	1.11721	5e-05	0.000136014	up	9670	IMP13|KAP13|LGL2|RANBP13	MIM:610411|HGNC:HGNC:16853|Ensembl:ENSG00000117408|HPRD:13742|Vega:OTTHUMG00000008297	1	1p34.1	importin 13		GO:0031965(nuclear membrane)//GO:0005737(cytoplasm)	GO:0008139(nuclear localization sequence binding)//GO:0005515(protein binding)//GO:0008565(protein transporter activity)//GO:0008536(Ran GTPase binding)	GO:0006606(protein import into nucleus)
AKR1A1	ENSG00000117448	protein_coding	+	chr1:46016214-46035721	55.835	21.673	2.50673	1.36527	5e-05	0.000136014	up	10327	ALDR1|ALR|ARM|DD3|HEL-S-6	MIM:103830|HGNC:HGNC:380|Ensembl:ENSG00000117448|HPRD:00069|Vega:OTTHUMG00000007740	1	1p33-p32	aldo-keto reductase family 1, member A1 (aldehyde reductase)	hsa00010(Glycolysis / Gluconeogenesis)//hsa00040(Pentose and glucuronate interconversions)//hsa00561(Glycerolipid metabolism)//	GO:0070062(extracellular exosome)//GO:0005615(extracellular space)//GO:0016324(apical plasma membrane)//GO:0005829(cytosol)	GO:0009055(electron carrier activity)//GO:0047939(L-glucuronate reductase activity)//GO:0016491(oxidoreductase activity)//GO:0005515(protein binding)//GO:0004032(alditol:NADP+ 1-oxidoreductase activity)	GO:0019640(glucuronate catabolic process to xylulose 5-phosphate)//GO:0055114(oxidation-reduction process)//GO:0044281(small molecule metabolic process)//GO:1901687(glutathione derivative biosynthetic process)//GO:0046185(aldehyde catabolic process)//GO:0042840(D-glucuronate catabolic process)//GO:0006081(cellular aldehyde metabolic process)//GO:0006006(glucose metabolic process)//GO:0005975(carb…
TSPAN1	ENSG00000117472	protein_coding	+	chr1:46505811-46651630	6.53965	0.429448	5.27452	3.92866	5e-05	0.000136014	up	10103	NET1|TM4C|TM4SF	MIM:613170|HGNC:HGNC:20657|Ensembl:ENSG00000117472|HPRD:18232|Vega:OTTHUMG00000007602	1	1p34.1	tetraspanin 1		GO:0005886(plasma membrane)//GO:0005887(integral component of plasma membrane)//GO:0016020(membrane)//GO:0048471(perinuclear region of cytoplasm)//GO:0005765(lysosomal membrane)//GO:0070062(extracellular exosome)//GO:0005737(cytoplasm)//GO:0031982(vesicle)	GO:0005515(protein binding)	GO:0045807(positive regulation of endocytosis)//GO:0050821(protein stabilization)//GO:0008283(cell proliferation)//GO:0007166(cell surface receptor signaling pathway)//GO:0016477(cell migration)
HSD11B1	ENSG00000117594	protein_coding	+	chr1:209834708-209908295	2.58458	0.8277	1.96125	1.64275	0.00265	0.00541414	up	3290	11-DH|11-beta-HSD1|CORTRD2|HDL|HSD11|HSD11B|HSD11L|SDR26C1	MIM:600713|HGNC:HGNC:5208|Ensembl:ENSG00000117594|HPRD:07042|Vega:OTTHUMG00000036481	1	1q32-q41	hydroxysteroid (11-beta) dehydrogenase 1	hsa00140(Steroid hormone biosynthesis)//hsa00980(Metabolism of xenobiotics by cytochrome P450)//	GO:0016020(membrane)//GO:0016021(integral component of membrane)//GO:0005789(endoplasmic reticulum membrane)	GO:0003845(11-beta-hydroxysteroid dehydrogenase [NAD(P)] activity)//GO:0016491(oxidoreductase activity)//GO:0070524(11-beta-hydroxysteroid dehydrogenase (NADP+) activity)	GO:0055114(oxidation-reduction process)//GO:0044281(small molecule metabolic process)//GO:0006704(glucocorticoid biosynthetic process)//GO:0030324(lung development)//GO:0008202(steroid metabolic process)
TXNDC12	ENSG00000117862	protein_coding	-	chr1:52485802-52556388	23.9375	9.76853	2.31578	1.29306	5e-05	0.000136014	up	51060	AG1|AGR1|ERP16|ERP18|ERP19|PDIA16|TLP19|hAG-1|hTLP19	MIM:609448|HGNC:HGNC:24626|Ensembl:ENSG00000117862|HPRD:11633|Vega:OTTHUMG00000008629	1	1p32.3	thioredoxin domain containing 12 (endoplasmic reticulum)	hsa00480(Glutathione metabolism)	GO:0005788(endoplasmic reticulum lumen)	GO:0015037(peptide disulfide oxidoreductase activity)//GO:0019153(protein-disulfide reductase (glutathione) activity)//GO:0005515(protein binding)	GO:0045454(cell redox homeostasis)//GO:0055114(oxidation-reduction process)//GO:1902236(negative regulation of endoplasmic reticulum stress-induced intrinsic apoptotic signaling pathway)
MREG	ENSG00000118242	protein_coding	-	chr2:216809212-216967506	1.66393	0.459106	1.82573	1.85769	0.0313	0.0501127	up	55686	DSU|WDT2	MIM:609207|HGNC:HGNC:25478|Ensembl:ENSG00000118242|HPRD:07645	2	2q35	melanoregulin		GO:0043234(protein complex)//GO:0016324(apical plasma membrane)//GO:0042470(melanosome)		GO:0030318(melanocyte differentiation)//GO:0032402(melanosome transport)
CASC1	ENSG00000118307	protein_coding	-	chr12:25261353-25348096	1.5195	0.529286	1.6475	1.52148	0.00155	0.0033119	up	55259	LAS1|PPP1R54	HGNC:HGNC:29599|Ensembl:ENSG00000118307|HPRD:16684|Vega:OTTHUMG00000150195	12	12p12.1	cancer susceptibility candidate 1
ELOVL4	ENSG00000118402	protein_coding	-	chr6:80624528-80657297	1.6109	0.303654	2.00276	2.40737	5e-05	0.000136014	up	6785	ADMD|CT118|ISQMR|SCA34|STGD2|STGD3	MIM:605512|HGNC:HGNC:14415|Ensembl:ENSG00000118402|HPRD:05697|Vega:OTTHUMG00000015087	6	6q14	ELOVL fatty acid elongase 4	hsa00062(Fatty acid elongation)	GO:0005783(endoplasmic reticulum)//GO:0030176(integral component of endoplasmic reticulum membrane)	GO:0008020(G-protein coupled photoreceptor activity)//GO:0005515(protein binding)//GO:0016740(transferase activity)	GO:0044255(cellular lipid metabolic process)//GO:0044281(small molecule metabolic process)//GO:0035338(long-chain fatty-acyl-CoA biosynthetic process)//GO:0019432(triglyceride biosynthetic process)//GO:0042761(very long-chain fatty acid biosynthetic process)//GO:0009584(detection of visible light)//GO:0006633(fatty acid biosynthetic process)//GO:0019367(fatty acid elongation, saturated fatty acid)
PLAGL1	ENSG00000118495	protein_coding	-	chr6:144261436-144385735	39.9627	16.2024	2.38122	1.30245	5e-05	0.000136014	up	5325	LOT1|ZAC|ZAC1	MIM:603044|HGNC:HGNC:9046|Ensembl:ENSG00000118495|HPRD:16010|Vega:OTTHUMG00000015738	6	6q24-q25	PLAG1 like zinc finger 1		GO:0005654(nucleoplasm)//GO:0043231(intracellular membrane-bounded organelle)//GO:0005634(nucleus)//GO:0005794(Golgi apparatus)	GO:0001228(transcriptional activator activity, RNA polymerase II transcription regulatory region sequence-specific binding)//GO:0046872(metal ion binding)//GO:0000977(RNA polymerase II regulatory region sequence-specific DNA binding)//GO:0003677(DNA binding)//GO:0003700(transcription factor activity, sequence-specific DNA binding)	GO:0007050(cell cycle arrest)//GO:0006351(transcription, DNA-templated)//GO:0030154(cell differentiation)//GO:0006366(transcription from RNA polymerase II promoter)//GO:0045944(positive regulation of transcription from RNA polymerase II promoter)//GO:0006357(regulation of transcription from RNA polymerase II promoter)//GO:0006915(apoptotic process)//GO:0035914(skeletal muscle cell differentiation)
CTGF	ENSG00000118523	protein_coding	-	chr6:132269315-132398533	445.074	198.489	2.23608	1.16498	5e-05	0.000136014	up	1490	CCN2|HCS24|IGFBP8|NOV2	MIM:121009|HGNC:HGNC:2500|Ensembl:ENSG00000118523|HPRD:00412|Vega:OTTHUMG00000015573	6	6q23.1	connective tissue growth factor	hsa04390(Hippo signaling pathway)	GO:0005886(plasma membrane)//GO:0005576(extracellular region)//GO:0005938(cell cortex)//GO:0048471(perinuclear region of cytoplasm)//GO:0005794(Golgi apparatus)//GO:0005829(cytosol)//GO:0043231(intracellular membrane-bounded organelle)//GO:0005578(proteinaceous extracellular matrix)//GO:0005615(extracellular space)//GO:0005801(cis-Golgi network)	GO:0008083(growth factor activity)//GO:0008201(heparin binding)//GO:0001968(fibronectin binding)//GO:0005178(integrin binding)//GO:0005520(insulin-like growth factor binding)//GO:0005515(protein binding)//GO:0008022(protein C-terminus binding)	GO:0070374(positive regulation of ERK1 and ERK2 cascade)//GO:0072593(reactive oxygen species metabolic process)//GO:0070278(extracellular matrix constituent secretion)//GO:0010260(organ senescence)//GO:0070318(positive regulation of G0 to G1 transition)//GO:0010628(positive regulation of gene expression)//GO:0001502(cartilage condensation)//GO:0060548(negative regulation of cell death)//GO:001647…
DCLRE1B	ENSG00000118655	protein_coding	+	chr1:114304453-114456708	1.85836	0.573464	1.8166	1.69626	5e-05	0.000136014	up	64858	APOLLO|SNM1B|SNMIB	MIM:609683|HGNC:HGNC:17641|Ensembl:ENSG00000118655|HPRD:16785|Vega:OTTHUMG00000011937	1	1p13.2	DNA cross-link repair 1B		GO:0005813(centrosome)//GO:0000784(nuclear chromosome, telomeric region)//GO:0000781(chromosome, telomeric region)//GO:0005737(cytoplasm)	GO:0005515(protein binding)//GO:0008409(5'-3' exonuclease activity)//GO:0003684(damaged DNA binding)//GO:0035312(5'-3' exodeoxyribonuclease activity)	GO:0000723(telomere maintenance)//GO:0036297(interstrand cross-link repair)//GO:0031627(telomeric loop formation)//GO:0006303(double-strand break repair via nonhomologous end joining)//GO:0031860(telomeric 3' overhang formation)//GO:0090305(nucleic acid phosphodiester bond hydrolysis)//GO:0000075(cell cycle checkpoint)//GO:0031848(protection from non-homologous end joining at telomere)
SPP1	ENSG00000118785	protein_coding	+	chr4:88896818-88904562	80.9996	16.0251	4.81639	2.33758	5e-05	0.000136014	up	6696	BNSP|BSPI|ETA-1|OPN	MIM:166490|HGNC:HGNC:11255|Ensembl:ENSG00000118785|HPRD:01325|Vega:OTTHUMG00000130599	4	4q22.1	secreted phosphoprotein 1	hsa04151(PI3K-Akt signaling pathway)//hsa04510(Focal adhesion)//hsa04512(ECM-receptor interaction)//hsa04620(Toll-like receptor signaling pathway)	GO:0070062(extracellular exosome)//GO:0045177(apical part of cell)//GO:0048471(perinuclear region of cytoplasm)//GO:0042995(cell projection)//GO:0005576(extracellular region)//GO:0005615(extracellular space)	GO:0050840(extracellular matrix binding)//GO:0005515(protein binding)//GO:0005125(cytokine activity)	GO:0045780(positive regulation of bone resorption)//GO:0007566(embryo implantation)//GO:0048685(negative regulation of collateral sprouting of intact axon in response to injury)//GO:0071498(cellular response to fluid shear stress)//GO:0022617(extracellular matrix disassembly)//GO:0030198(extracellular matrix organization)//GO:0046697(decidualization)//GO:0007155(cell adhesion)//GO:0033280(respons…
FAM47E-STBD1	ENSG00000118804	protein_coding	+	chr4:77135192-77232752	3.66134	1.72521	1.71045	1.0856	0.00085	0.00191134	up	100631383	-	HGNC:HGNC:44667|Ensembl:ENSG00000272414|Vega:OTTHUMG00000160966	4	4q	FAM47E-STBD1 readthrough
RARRES1	ENSG00000118849	protein_coding	-	chr3:158414680-158547508	3.06856	0.561684	2.60524	2.44973	0.00025	0.000618933	up	5918	LXNL|PERG-1|TIG1	MIM:605090|HGNC:HGNC:9867|Ensembl:ENSG00000118849|HPRD:05477|Vega:OTTHUMG00000158834	3	3q25.32	retinoic acid receptor responder (tazarotene induced) 1		GO:0016021(integral component of membrane)//GO:0070062(extracellular exosome)		GO:0008285(negative regulation of cell proliferation)
DNAH7	ENSG00000118997	protein_coding	-	chr2:196602426-196933536	3.75909	1.65609	1.79177	1.1826	5e-05	0.000136014	up	56171	-	MIM:610061|HGNC:HGNC:18661|Ensembl:ENSG00000118997|HPRD:10914|Vega:OTTHUMG00000154438	2	2q32.3	dynein, axonemal, heavy chain 7	hsa05016(Huntington's disease)	GO:0036156(inner dynein arm)//GO:0005929(cilium)//GO:0005858(axonemal dynein complex)//GO:0005737(cytoplasm)//GO:0005874(microtubule)	GO:0005524(ATP binding)//GO:0005509(calcium ion binding)//GO:0003777(microtubule motor activity)//GO:0016887(ATPase activity)	GO:0008152(metabolic process)//GO:0001539(cilium or flagellum-dependent cell motility)//GO:0003341(cilium movement)//GO:0036159(inner dynein arm assembly)
NDUFB3	ENSG00000119013	protein_coding	+	chr2:201773695-201950473	13.4694	4.94521	2.43379	1.44558	5e-05	0.000136014	up	4709	B12|CI-B12	MIM:603839|HGNC:HGNC:7698|Ensembl:ENSG00000119013|HPRD:11954|Vega:OTTHUMG00000132820	2	2q31.3	NADH:ubiquinone oxidoreductase subunit B3	hsa00190(Oxidative phosphorylation)//	GO:0005743(mitochondrial inner membrane)//GO:0070062(extracellular exosome)//GO:0005747(mitochondrial respiratory chain complex I)//GO:0016021(integral component of membrane)	GO:0008137(NADH dehydrogenase (ubiquinone) activity)	GO:0032981(mitochondrial respiratory chain complex I assembly)//GO:0044281(small molecule metabolic process)//GO:0022904(respiratory electron transport chain)//GO:0022900(electron transport chain)//GO:0006120(mitochondrial electron transport, NADH to ubiquinone)//GO:0044237(cellular metabolic process)
GTF3C3	ENSG00000119041	protein_coding	-	chr2:197504277-197664449	22.9807	11.1572	1.97255	1.04245	5e-05	0.000136014	up	9330	TFIIIC102|TFIIICgamma|TFiiiC2-102	MIM:604888|HGNC:HGNC:4666|Ensembl:ENSG00000119041|HPRD:11997|Vega:OTTHUMG00000154633	2	2q33.1	general transcription factor IIIC subunit 3		GO:0016021(integral component of membrane)//GO:0031965(nuclear membrane)//GO:0000127(transcription factor TFIIIC complex)//GO:0005730(nucleolus)//GO:0005654(nucleoplasm)//GO:0005634(nucleus)	GO:0005515(protein binding)//GO:0003677(DNA binding)	GO:0006383(transcription from RNA polymerase III promoter)//GO:0042791(5S class rRNA transcription from RNA polymerase III type 1 promoter)//GO:0010467(gene expression)//GO:0006351(transcription, DNA-templated)//GO:0042797(tRNA transcription from RNA polymerase III promoter)
[truncated: 1,464 more rows]

## Sheet: dn.LFH_vs_LFN
LFH vs LFN.down Fold Change: 2.0 p-value: 0.05 FPKM >= 0.1 in at least one group Column A: gene, the gene name. Column B: gene_id, the Ensembl gene identifier. Column C: biotype, protein_coding. Column D: strand, transcription direction. Column E: locus, genomic locus. chromosome: start-end. Column F ~ G, FPKM value of each group. Column H: fold change, fold change between two groups (to avoid di…
[truncated: 1,985 more rows]
